# Supplementary material for: Suppression of Molecular Inflammatory Pathways by Toll-Like Receptor 7, 8, and 9 Antagonists in a Model of IL-23-Induced Skin Inflammation
Source: PLoS One. 2013 Dec 27;8(12):e84634. doi: 10.1371/journal.pone.0084634 (PMC3874038; doi:10.1371/journal.pone.0084634)
Supplement: Table S1 — The IL-23-induced mouse model transcriptome. (XLSX) [file pone.0084634.s002.xlsx]

## Sheet: Resfdr05fch2SomeDiff.txt
Probe	Symbol	Description	Gene	logFCH_IL23_IMO3100vsSaline	FCH_IL23_IMO3100vsSaline	P_IL23_IMO3100vsSaline	FDR_IL23_IMO3100vsSaline	Status_IL23_IMO3100vsSaline	logFCH_IL23_IMO8400vsSaline	FCH_IL23_IMO8400vsSaline	P_IL23_IMO8400vsSaline	FDR_IL23_IMO8400vsSaline	Status_IL23_IMO8400vsSaline	logFCH_IL23vsNormal	FCH_IL23vsNormal	P_IL23vsNormal	FDR_IL23vsNormal	Status_IL23vsNormal	GroupNormal	GroupIL-23/saline	GroupIL-23/IMO-3100	GroupIL-23/IMO-8400
1423944_at	Hpx	hemopexin	15458	-4.37819	-20.7954	5.33e-18	1.65e-13	-1	-4.3552	-20.4666	5.86e-18	1.82e-13	-1	4.43825	21.6794	4.17e-18	1.29e-13	1	2.01907	6.45732	2.07913	2.10212
1456936_at	Cabp4	calcium binding protein 4	73660	3.38302	10.4325	2.5588e-15	3.961e-11	1	-0.0457654	-1.03223	0.749158	0.855707	0	0.122353	1.08851	0.396707	0.495984	0	2.03997	2.16232	5.54534	2.11655
1424063_at	Abpa	androgen binding protein alpha	11354	6.66604	101.549	2.63462e-14	2.71892e-10	1	7.43177	172.658	3.83047e-15	5.9296e-11	1	0.154463	1.11301	0.631655	0.714689	0	2.12261	2.27708	8.94311	9.70885
1420515_a_at	Pglyrp2	peptidoglycan recognition protein 2	57757	-1.96399	-3.90141	1.08627e-13	8.4077e-10	-1	-1.8384	-3.57612	3.45235e-13	2.1377e-09	-1	1.96929	3.91574	1.03615e-13	4.00991e-10	1	2.06271	4.032	2.068	2.1936
1450297_at	Il6	interleukin 6	16193	-6.62597	-98.7678	2.6036e-13	1.61215e-09	-1	-6.61812	-98.2322	2.65803e-13	2.1377e-09	-1	6.56687	94.8038	3.04447e-13	7.85474e-10	1	2.08611	8.65298	2.02701	2.03486
1449965_at	Mcpt8	mast cell protease 8	17231	-5.98626	-63.3932	3.23365e-13	1.66856e-09	-1	-6.03908	-65.7574	2.77389e-13	2.1377e-09	-1	6.03734	65.6779	2.78794e-13	7.84679e-10	1	2.08309	8.12043	2.13417	2.08135
1419725_at	Slc26a4	solute carrier family 26, member 4	23985	-6.08574	-67.9188	4.50626e-13	1.99305e-09	-1	-6.08574	-67.9188	4.50626e-13	2.32523e-09	-1	6.08574	67.9188	4.50626e-13	9.94384e-10	1	2.01891	8.10465	2.01891	2.01891
1421672_at	Il17a	interleukin 17A	16171	-3.68283	-12.8423	9.42894e-13	3.649e-09	-1	-3.6495	-12.549	1.10377e-12	4.88181e-09	-1	3.68805	12.8889	9.20027e-13	1.35638e-09	1	2.02029	5.70834	2.02551	2.05884
1419503_at	Stc2	stanniocalcin 2	20856	-3.11531	-8.66564	1.38983e-12	4.78101e-09	-1	-2.79252	-6.92841	9.0946e-12	2.81569e-08	-1	3.1558	8.9123	1.11152e-12	1.47999e-09	1	2.1612	5.317	2.20169	2.52447
1418304_at	Cdhr1	cadherin-related family member 1	170677	-5.17286	-36.0734	1.72844e-12	5.35125e-09	-1	-4.79005	-27.6661	6.47746e-12	2.22825e-08	-1	5.46775	44.2543	6.61641e-13	1.22473e-09	1	2.67548	8.14323	2.97036	3.35318
1450645_at	Mt4	metallothionein 4	17752	7.63666	199.005	1.16529e-11	3.27976e-08	1	6.98517	126.691	5.25748e-11	1.25209e-07	1	-7.67363	-204.171	1.07334e-11	7.39022e-09	-1	12.733	5.05936	12.696	12.0445
1429565_s_at	Lce1m	late cornified envelope 1M	66203	2.90743	7.5028	6.18694e-11	1.59623e-07	1	2.97574	7.86661	4.19028e-11	1.08109e-07	1	-3.67142	-12.7412	1.15917e-12	1.47999e-09	-1	14.5981	10.9267	13.8341	13.9024
1420692_at	Il2ra	interleukin 2 receptor, alpha chain	16184	-3.0514	-8.29017	7.85222e-11	1.74718e-07	-1	-1.79082	-3.46012	3.26939e-07	5.56008e-05	-1	3.53585	11.5984	6.5013e-12	5.16103e-09	1	4.22901	7.76486	4.71346	5.97403
1419728_at	Cxcl5	chemokine (C-X-C motif) ligand 5	20311	-6.8318	-113.914	7.90067e-11	1.74718e-07	-1	-6.46151	-88.1269	1.99427e-10	3.63191e-07	-1	7.0428	131.854	4.74711e-11	1.95961e-08	1	2.01891	9.06171	2.22991	2.6002
1425475_at	Col4a5	collagen, type IV, alpha 5	12830	1.81295	3.51361	1.03902e-10	2.14453e-07	1	2.01851	4.05164	1.70848e-11	4.80858e-08	1	-2.62482	-6.16807	1.8405e-13	6.33132e-10	-1	7.816	5.19118	7.00414	7.20969
1449326_x_at	Saa2	serum amyloid A 2	20209	-5.67315	-51.0258	1.20517e-10	2.33199e-07	-1	-6.78864	-110.557	5.82278e-12	2.22825e-08	-1	7.24054	151.224	1.92402e-12	2.20621e-09	1	4.71454	11.9551	6.28193	5.16644
1440796_at	A330021E22Rik	RIKEN cDNA A330021E22 gene	207686	-3.45925	-10.9986	2.23797e-10	4.07573e-07	-1	-2.84632	-7.19162	5.21572e-09	3.63063e-06	-1	3.73408	13.3066	6.27842e-11	2.28682e-08	1	3.29084	7.02491	3.56566	4.17859
1449366_at	Mmp8	matrix metallopeptidase 8	17394	-4.69551	-25.9114	2.42749e-10	4.17528e-07	-1	-4.21563	-18.5793	1.40662e-09	1.3609e-06	-1	4.69567	25.9141	2.42619e-10	5.58402e-08	1	2.01891	6.71457	2.01906	2.49895
1417546_at	Il2rb	interleukin 2 receptor, beta chain	16185	-2.59077	-6.02422	2.95742e-10	4.81904e-07	-1	-2.55876	-5.89202	3.62746e-10	5.10482e-07	-1	2.59836	6.05598	2.8185e-10	6.23292e-08	1	2.01891	4.61727	2.0265	2.05851
1425476_at	Col4a5	collagen, type IV, alpha 5	12830	2.273	4.83327	3.19295e-10	4.94269e-07	1	2.1226	4.35479	9.7515e-10	1.11817e-06	1	-2.87481	-7.33505	6.18916e-12	5.04254e-09	-1	9.7372	6.86239	9.13539	8.985
1429869_at	Wdr65	WD repeat domain 65	68625	6.16016	71.5144	4.54536e-10	6.43887e-07	1	6.9265	121.642	6.52709e-11	1.44342e-07	1	-6.79548	-111.082	8.9803e-11	2.76912e-08	-1	9.83909	3.04361	9.20377	9.97012
1421092_at	Serpina12	serine (or cysteine) peptidase inhibitor, clade A (alpha-1 antiproteinase, antitrypsin), member 12	68054	5.80197	55.7914	4.57543e-10	6.43887e-07	1	5.96758	62.5779	2.88359e-10	4.69873e-07	1	-6.54767	-93.5503	6.18076e-11	2.27805e-08	-1	13.0654	6.51768	12.3197	12.4853
1417943_at	Gng4	guanine nucleotide binding protein (G protein), gamma 4	14706	4.42923	21.5442	4.83953e-10	6.51443e-07	1	4.31919	19.962	7.29232e-10	9.03081e-07	1	-5.03214	-32.7209	5.85082e-11	2.21065e-08	-1	8.8838	3.85166	8.28089	8.17084
1427624_s_at				-5.85608	-57.9237	5.38956e-10	6.95253e-07	-1	-4.2066	-18.4635	9.43413e-08	2.73519e-05	-1	6.62423	98.649	7.02868e-11	2.3913e-08	1	2.01891	8.64314	2.78706	4.43654
1420413_at	Slc7a11	solute carrier family 7 (cationic amino acid transporter, y+ system), member 11	26570	-4.94389	-30.7794	5.96545e-10	7.38761e-07	-1	-4.7576	-27.0508	1.11247e-09	1.18766e-06	-1	5.38754	41.8612	1.45166e-10	3.84132e-08	1	2.17524	7.56278	2.61888	2.80518
1445242_at	Gyk	glycerol kinase	14933	-3.51286	-11.415	6.26777e-10	7.46347e-07	-1	-3.59362	-12.0722	4.3248e-10	5.82156e-07	-1	4.17145	18.019	3.63362e-11	1.73072e-08	1	2.28453	6.45598	2.94312	2.86237
1450995_at	Folr1	folate receptor 1 (adult)	14275	-2.82971	-7.10929	7.21356e-10	8.27155e-07	-1	-2.4989	-5.65255	5.27738e-09	3.63063e-06	-1	2.86451	7.28288	5.91217e-10	1.05804e-07	1	2.07934	4.94385	2.11414	2.44495
1442863_at	Cacna2d4	calcium channel, voltage-dependent, alpha 2/delta subunit 4	319734	-3.46154	-11.0161	7.75493e-10	8.57474e-07	-1	-3.27237	-9.66229	1.91966e-09	1.74802e-06	-1	3.53517	11.5929	5.50555e-10	1.01459e-07	1	2.01891	5.55408	2.09254	2.28171
1418094_s_at	Car4	carbonic anhydrase 4	12351	-4.77699	-27.4169	9.2492e-10	9.87432e-07	-1	-3.9188	-15.1244	2.10492e-08	9.86985e-06	-1	4.64353	24.9944	1.46128e-09	2.15434e-07	1	4.88615	9.52969	4.75269	5.61088
1448949_at	Car4	carbonic anhydrase 4	12351	-5.57318	-47.6095	9.7825e-10	1.00955e-06	-1	-4.51957	-22.9364	2.64686e-08	1.14798e-05	-1	5.00163	32.0361	5.50339e-09	5.49629e-07	1	4.34281	9.34444	3.77126	4.82487
1450298_at	Tnfsf14	tumor necrosis factor (ligand) superfamily, member 14	50930	-3.06068	-8.34364	1.05371e-09	1.05235e-06	-1	-2.70692	-6.52926	7.44023e-09	4.60699e-06	-1	3.26778	9.63166	3.62746e-10	7.4375e-08	1	3.03192	6.29971	3.23903	3.59279
1456907_at	Cxcl9	chemokine (C-X-C motif) ligand 9	17329	-3.99991	-15.9991	1.3419e-09	1.2594e-06	-1	-4.36859	-20.6575	3.1963e-10	4.82512e-07	-1	4.66446	25.3596	1.08125e-10	3.0996e-08	1	4.2771	8.94156	4.94165	4.57297
1453568_at	Dapl1	death associated protein-like 1	76747	1.30564	2.47194	1.36248e-09	1.2594e-06	1	1.29107	2.4471	1.63195e-09	1.53107e-06	1	-1.4395	-2.71227	2.77985e-10	6.23292e-08	-1	14.9891	13.5496	14.8552	14.8406
1434845_at				1.52113	2.87016	1.40379e-09	1.2594e-06	1	1.81216	3.51168	7.9338e-11	1.63754e-07	1	-1.80069	-3.48387	8.82097e-11	2.76912e-08	-1	12.1448	10.3441	11.8653	12.1563
1421091_at	Serpina12	serine (or cysteine) peptidase inhibitor, clade A (alpha-1 antiproteinase, antitrypsin), member 12	68054	3.89057	14.8313	1.8341e-09	1.57732e-06	1	4.32637	20.0617	3.27285e-10	4.82512e-07	1	-4.68028	-25.6393	8.90388e-11	2.76912e-08	-1	7.64521	2.96493	6.8555	7.2913
1425035_s_at	Dnmt3l	DNA (cytosine-5-)-methyltransferase 3-like	54427	-3.49877	-11.304	2.20226e-09	1.84275e-06	-1	-3.39251	-10.5014	3.59801e-09	2.78486e-06	-1	2.92817	7.61146	3.52968e-08	2.04642e-06	1	7.11318	10.0414	6.54259	6.64884
1435459_at	Fmo2	flavin containing monooxygenase 2	55990	3.96799	15.6489	2.37771e-09	1.9285e-06	1	4.75062	26.9203	1.26335e-10	2.44459e-07	1	-5.01533	-32.3419	5.10851e-11	2.08105e-08	-1	7.89291	2.87757	6.84557	7.6282
1427747_a_at	Lcn2	lipocalin 2	16819	-2.54414	-5.83258	2.42931e-09	1.9285e-06	-1	-1.95252	-3.87049	1.4062e-07	3.45523e-05	-1	5.73738	53.3487	2.21402e-15	1.7137e-11	1	8.53066	14.268	11.7239	12.3155
1425570_at	Slamf1	signaling lymphocytic activation molecule family member 1	27218	-2.16646	-4.48921	3.05075e-09	2.32395e-06	-1	-1.91103	-3.76078	2.16346e-08	9.86985e-06	-1	2.3212	4.99746	1.009e-09	1.57771e-07	1	2.01891	4.3401	2.17364	2.42907
1455123_at	St18	suppression of tumorigenicity 18	240690	2.65461	6.29675	3.07758e-09	2.32395e-06	1	1.01999	2.02791	0.000708213	0.00611612	1	0.780191	1.71736	0.00599192	0.0172359	0	2.07168	2.85187	5.50648	3.87186
1447669_s_at	Gng4	guanine nucleotide binding protein (G protein), gamma 4	14706	5.23566	37.6783	3.26194e-09	2.40451e-06	1	5.0717	33.6305	5.39435e-09	3.63063e-06	1	-5.42212	-42.8766	1.86656e-09	2.59064e-07	-1	9.86569	4.44357	9.67924	9.51527
1422701_at	Zap70	zeta-chain (TCR) associated protein kinase	22637	-2.24157	-4.72911	4.24366e-09	3.05543e-06	-1	-1.71622	-3.28575	2.42423e-07	4.9055e-05	-1	2.72405	6.60727	1.80556e-10	4.50807e-08	1	2.11478	4.83884	2.59727	3.12262
1452001_at	Nfe2	nuclear factor, erythroid derived 2	18022	-3.07162	-8.40717	5.84901e-09	4.11557e-06	-1	-3.0967	-8.55461	5.1464e-09	3.63063e-06	-1	2.8972	7.44977	1.45448e-08	1.12017e-06	1	2.44288	5.34008	2.26846	2.24337
1439755_at	Sipa1l1	signal-induced proliferation-associated 1 like 1	217692	1.29728	2.45765	6.87014e-09	4.72666e-06	1	0.321448	1.24958	0.0226181	0.070826	0	-0.74419	-1.67503	1.70534e-05	0.000181497	0	9.51512	8.77093	10.0682	9.09238
1440275_at	Runx3	runt related transcription factor 3	12399	-1.77458	-3.42139	7.40407e-09	4.98326e-06	-1	-1.0821	-2.11711	8.50818e-06	0.000365344	-1	1.93379	3.82058	1.89883e-09	2.61278e-07	1	7.32039	9.25418	7.4796	8.17208
1449835_at	Pdcd1	programmed cell death 1	18566	-1.57238	-2.97395	7.73667e-09	5.09632e-06	-1	-1.77662	-3.42623	1.10958e-09	1.18766e-06	-1	2.02005	4.05598	1.35342e-10	3.67561e-08	1	2.58246	4.60251	3.03013	2.82589
1424437_s_at	Abcg4	ATP-binding cassette, sub-family G (WHITE), member 4	192663	-2.77617	-6.85029	8.00725e-09	5.16468e-06	-1	-1.68302	-3.21099	9.74462e-06	0.000396474	-1	2.33639	5.05038	1.10054e-07	4.62943e-06	1	4.93923	7.27563	4.49946	5.59261
1436643_x_at	Hamp2	hepcidin antimicrobial peptide 2	66438	7.63968	199.422	8.92897e-09	5.64165e-06	1	6.72881	106.065	6.21295e-08	2.06831e-05	1	-10.6477	-1604.32	4.04399e-11	1.79401e-08	-1	13.3842	2.73643	10.3761	9.46524
1453435_a_at	Fmo2	flavin containing monooxygenase 2	55990	3.57116	11.8858	1.0563e-08	6.48684e-06	1	4.3054	19.7722	5.35409e-10	6.90677e-07	1	-4.58469	-23.9955	1.90637e-10	4.68022e-08	-1	8.07946	3.49477	7.06593	7.80016
1456609_at	Camk2n1	calcium/calmodulin-dependent protein kinase II inhibitor 1	66259	2.76908	6.81673	1.06857e-08	6.48684e-06	1	2.85893	7.25479	6.49029e-09	4.2753e-06	1	-3.2552	-9.54799	8.1717e-10	1.36019e-07	-1	9.55198	6.29678	9.06586	9.15571
1431109_at	Prr16	proline rich 16	71373	-1.56494	-2.95866	1.10807e-08	6.59729e-06	-1	-1.38286	-2.60785	7.27879e-08	2.32321e-05	-1	1.15247	2.22294	9.94199e-07	2.24889e-05	1	3.1136	4.26606	2.70112	2.8832
1421006_at	Col4a6	collagen, type IV, alpha 6	94216	3.7793	13.7304	1.13354e-08	6.62159e-06	1	3.48696	11.2119	3.89209e-08	1.5253e-05	1	-4.40296	-21.1554	1.0055e-09	1.57771e-07	-1	7.57257	3.16961	6.94891	6.65657
1457231_at				-1.62286	-3.07985	1.18703e-08	6.80564e-06	-1	-1.57915	-2.98793	1.80948e-08	8.89228e-06	-1	1.74323	3.34783	3.86779e-09	4.4187e-07	1	8.30023	10.0435	8.4206	8.46431
1437595_at	E030010A14Rik	RIKEN cDNA E030010A14 gene	226040	-2.74516	-6.70462	1.37074e-08	7.71604e-06	-1	-2.80747	-7.00057	9.67601e-09	5.44671e-06	-1	2.40761	5.30596	9.9731e-08	4.2944e-06	1	5.95121	8.35883	5.61367	5.55135
1444090_at	Pram1	PML-RAR alpha-regulated adaptor molecule 1	378460	-2.70767	-6.53265	1.5496e-08	8.56709e-06	-1	-2.21804	-4.65261	3.02151e-07	5.35621e-05	-1	3.28781	9.76629	7.13091e-10	1.23337e-07	1	5.40886	8.69667	5.989	6.47862
1434287_at	Agpat5	1-acylglycerol-3-phosphate O-acyltransferase 5 (lysophosphatidic acid acyltransferase, epsilon)	52123	1.34154	2.53421	1.68127e-08	9.13195e-06	1	1.26328	2.4004	4.20363e-08	1.60208e-05	1	-1.51809	-2.86411	2.41768e-09	3.11884e-07	-1	11.2574	9.73932	11.0809	11.0026
1419600_at	Defb4	defensin beta 4	56519	-4.36316	-20.5798	2.02209e-08	1.07938e-05	-1	-4.903	-29.9192	3.27128e-09	2.66523e-06	-1	4.93766	30.6466	2.92481e-09	3.60766e-07	1	2.03177	6.96943	2.60627	2.06643
1416368_at	Gsta4	glutathione S-transferase, alpha 4	14860	-3.16013	-8.93913	2.07166e-08	1.08709e-05	-1	-3.00104	-8.00578	4.54208e-08	1.65439e-05	-1	3.37653	10.3857	7.42523e-09	6.84182e-07	1	9.97464	13.3512	10.191	10.3501
1460227_at	Timp1	tissue inhibitor of metalloproteinase 1	21857	-3.51624	-11.4418	2.14614e-08	1.09769e-05	-1	-3.28062	-9.71774	6.13289e-08	2.06385e-05	-1	4.54599	23.3604	3.61883e-10	7.4375e-08	1	9.27964	13.8256	10.3094	10.545
1426755_at	Ckap4	cytoskeleton-associated protein 4	216197	-1.50656	-2.84131	2.17866e-08	1.09769e-05	-1	-0.966797	-1.9545	1.07399e-05	0.000419513	0	1.14358	2.20928	1.19746e-06	2.54625e-05	1	9.2755	10.4191	8.91252	9.45228
1450788_at	Saa1	serum amyloid A 1	20208	-5.94532	-61.6199	2.19821e-08	1.09769e-05	-1	-6.25304	-76.2697	1.0088e-08	5.47935e-06	-1	8.58566	384.185	5.92976e-11	2.21187e-08	1	2.11682	10.7025	4.75715	4.44944
1451858_at				-5.02146	-32.4795	2.31907e-08	1.13966e-05	-1	-5.02552	-32.5711	2.29055e-08	1.02776e-05	-1	5.02552	32.5711	2.29055e-08	1.52979e-06	1	2.01891	7.04443	2.02297	2.01891
1451565_s_at	Uroc1	urocanase domain containing 1	243537	-2.20632	-4.61497	2.37703e-08	1.14989e-05	-1	-1.97376	-3.92791	1.26208e-07	3.31136e-05	-1	2.16385	4.4811	3.19623e-08	1.9252e-06	1	2.2029	4.36675	2.16043	2.39299
1424502_at	Oit1	oncoprotein induced transcript 1	18300	-3.55268	-11.7345	2.62687e-08	1.2512e-05	-1	-3.74905	-13.4455	1.148e-08	6.12792e-06	-1	4.0333	16.3736	3.64831e-09	4.22789e-07	1	2.02187	6.05517	2.50249	2.30612
1441045_at	Ddx43	DEAD (Asp-Glu-Ala-Asp) box polypeptide 43	100048658	-1.21288	-2.318	2.73701e-08	1.28391e-05	-1	-1.23196	-2.34885	2.15645e-08	9.86985e-06	-1	1.33647	2.52533	6.09633e-09	5.95402e-07	1	2.52397	3.86044	2.64756	2.62848
1451866_a_at	Hgf	hepatocyte growth factor	15234	-2.79419	-6.93642	3.05662e-08	1.40888e-05	-1	-2.86135	-7.26697	2.12724e-08	9.86985e-06	-1	3.03885	8.21837	8.38488e-09	7.53493e-07	1	2.15965	5.1985	2.40431	2.33715
1429298_at	Ddah1	dimethylarginine dimethylaminohydrolase 1	69219	-2.85991	-7.2597	3.09443e-08	1.40888e-05	-1	-2.05489	-4.15512	3.40008e-06	0.000225894	-1	2.95409	7.74943	1.88619e-08	1.33368e-06	1	6.6291	9.5832	6.72329	7.5283
1455031_at	Cdk19	cyclin-dependent kinase 19	78334	1.28795	2.44181	3.35091e-08	1.50149e-05	1	0.507752	1.42183	0.00211856	0.0130077	0	-0.0403442	-1.02836	0.779657	0.837143	0	9.01483	8.97448	10.2624	9.48223
1422704_at	Gyk	glycerol kinase	14933	-1.41626	-2.66893	3.39483e-08	1.50149e-05	-1	-1.73841	-3.33666	1.37226e-09	1.3609e-06	-1	2.80774	7.00185	4.26498e-13	9.94384e-10	1	9.26522	12.073	10.6567	10.3345
1433923_at	Krt77	keratin 77	406220	1.61865	3.07087	3.71163e-08	1.61848e-05	1	1.76284	3.39364	1.00161e-08	5.47935e-06	1	-1.85458	-3.61645	4.52193e-09	4.86108e-07	-1	14.1338	12.2792	13.8979	14.042
1433212_at	2700008E08Rik	RIKEN cDNA 2700008E08 gene	72539	1.99899	3.9972	3.89789e-08	1.65451e-05	1	0.922674	1.89563	0.000590187	0.00537892	0	-0.933192	-1.9095	0.000530841	0.00253977	0	5.32122	4.38803	6.38702	5.31071
1421462_a_at	Lepre1	leprecan 1	56401	-2.26126	-4.79412	3.90114e-08	1.65451e-05	-1	-1.93482	-3.82331	3.84515e-07	6.26557e-05	-1	1.73705	3.33352	1.71279e-06	3.31084e-05	1	4.34671	6.08376	3.8225	4.14894
1418379_s_at	Gpr124	G protein-coupled receptor 124	78560	-1.29407	-2.45219	4.01531e-08	1.67992e-05	-1	-0.910952	-1.88029	5.54446e-06	0.000298117	0	1.11444	2.16511	3.60395e-07	1.06727e-05	1	9.3039	10.4183	9.12427	9.50739
1451320_at	Arhgap8	Rho GTPase activating protein 8	73167	-2.96908	-7.83036	4.08057e-08	1.68446e-05	-1	-2.36453	-5.14986	1.09201e-06	0.000109413	-1	2.79002	6.9164	1.0329e-07	4.3987e-06	1	4.2637	7.05373	4.08465	4.68919
1452597_at	2310061C15Rik	RIKEN cDNA 2310061C15 gene	66531	-1.13471	-2.19574	4.22179e-08	1.71982e-05	-1	-0.91371	-1.88388	9.67608e-07	0.000101895	0	0.977413	1.96893	3.76639e-07	1.10007e-05	0	11.1346	12.112	10.9773	11.1983
1429459_at	Sema3d	sema domain, immunoglobulin domain (Ig), short basic domain, secreted, (semaphorin) 3D	108151	2.62232	6.1574	4.27976e-08	1.7208e-05	1	2.04858	4.137	1.48218e-06	0.000131069	1	-2.36541	-5.153	1.96785e-07	6.82505e-06	-1	10.9972	8.63175	11.2541	10.6803
1428471_at	Sorbs1	sorbin and SH3 domain containing 1	20411	1.14593	2.21289	4.71549e-08	1.87169e-05	1	1.0076	2.01056	3.11867e-07	5.39408e-05	1	-1.68136	-3.20729	1.053e-10	3.04681e-08	-1	12.0813	10.4	11.5459	11.4076
1425086_a_at	Slamf6	SLAM family member 6	30925	-2.63139	-6.19621	5.06455e-08	1.98479e-05	-1	-2.84525	-7.18631	1.5409e-08	7.82068e-06	-1	4.28096	19.44	2.01253e-11	1.19468e-08	1	4.52276	8.80372	6.17233	5.95847
1439615_at	Gan	giant axonal neuropathy	209239	1.80204	3.48713	5.25273e-08	2.03281e-05	1	2.33369	5.04093	9.21606e-10	1.09742e-06	1	-2.17849	-4.52679	2.78342e-09	3.46537e-07	-1	11.4997	9.32119	11.1232	11.6549
1433051_at	2610011I18Rik	RIKEN cDNA 2610011I18 gene	70295	1.67856	3.20109	5.73706e-08	2.15857e-05	1	1.45905	2.74926	4.42322e-07	6.81307e-05	1	-1.52422	-2.87631	2.36951e-07	7.8376e-06	-1	4.65864	3.13442	4.81299	4.59347
1441855_x_at	Cxcl1	chemokine (C-X-C motif) ligand 1	14825	-4.21881	-18.6203	5.7654e-08	2.15857e-05	-1	-2.91419	-7.53804	9.55416e-06	0.000392303	-1	6.9165	120.802	2.04515e-11	1.19468e-08	1	2.67598	9.59248	5.37367	6.67829
1435435_at	Cttnbp2	cortactin binding protein 2	30785	2.30604	4.94524	5.78687e-08	2.15857e-05	1	1.66298	3.16669	5.55599e-06	0.000298117	1	-1.93808	-3.83197	7.15351e-07	1.77317e-05	-1	8.41444	6.47636	8.7824	8.13933
1453310_at	Ppil6	peptidylprolyl isomerase (cyclophilin)-like 6	73075	2.89671	7.44726	6.20925e-08	2.26875e-05	1	2.54374	5.831	4.12487e-07	6.51891e-05	1	-1.662	-3.16455	8.93161e-05	0.000645628	-1	6.93028	5.26828	8.16499	7.81203
1435679_at	Optn	optineurin	71648	1.09288	2.133	6.26791e-08	2.26875e-05	1	0.581996	1.49692	0.000198284	0.00265064	0	-0.436642	-1.35345	0.00264715	0.0089923	0	10.6524	10.2158	11.3087	10.7978
1460314_s_at				-2.59883	-6.05797	6.30207e-08	2.26875e-05	-1	-2.33361	-5.04064	3.0454e-07	5.35621e-05	-1	1.69241	3.23196	2.11516e-05	0.000214065	1	5.18997	6.88238	4.28355	4.54877
1434735_at	Hlf	hepatic leukemia factor	217082	2.3362	5.04971	6.81239e-08	2.41891e-05	1	2.65578	6.30187	9.63948e-09	5.44671e-06	1	-2.07945	-4.22645	3.71831e-07	1.08911e-05	-1	7.94544	5.866	8.2022	8.52178
1425829_a_at	Steap4	STEAP family member 4	117167	-2.58909	-6.0172	7.04669e-08	2.4513e-05	-1	-1.55051	-2.9292	6.10421e-05	0.00123198	-1	1.64817	3.13436	3.0269e-05	0.000282778	1	5.81048	7.45865	4.86956	5.90814
1419300_at	Flt1	FMS-like tyrosine kinase 1	14254	-1.44436	-2.72141	7.29761e-08	2.51038e-05	-1	-0.63412	-1.55199	0.00133621	0.00950136	0	0.146989	1.10726	0.392437	0.491678	0	6.65102	6.79801	5.35366	6.16389
1453257_at	Agpat5	1-acylglycerol-3-phosphate O-acyltransferase 5 (lysophosphatidic acid acyltransferase, epsilon)	52123	1.17295	2.25473	7.61981e-08	2.58251e-05	1	1.22565	2.33861	3.94254e-08	1.52576e-05	1	-0.806062	-1.74843	1.28439e-05	0.000146841	0	12.2708	11.4648	12.6377	12.6904
1420183_at	Lor	loricrin	16939	1.32427	2.50406	7.67412e-08	2.58251e-05	1	1.42392	2.68313	2.57212e-08	1.13761e-05	1	-1.27672	-2.42287	1.31687e-07	5.22407e-06	-1	13.3424	12.0657	13.39	13.4896
1451796_s_at	Hdc	histidine decarboxylase	15186	-3.64455	-12.506	8.58419e-08	2.79754e-05	-1	-3.41283	-10.6503	2.24546e-07	4.69727e-05	-1	6.67571	102.233	4.87541e-12	4.31265e-09	1	2.78487	9.46058	5.81603	6.04775
1418551_at	Mybpc3	myosin binding protein C, cardiac	17868	4.15648	17.8331	9.27302e-08	2.99055e-05	1	2.6091	6.10121	4.41402e-05	0.00100696	1	0.404855	1.32396	0.420046	0.518692	0	2.46043	2.86528	7.02177	5.47438
1457038_at	Frem2	Fras1 related extracellular matrix protein 2	242022	3.03343	8.18753	9.41316e-08	3.00445e-05	1	3.46276	11.0254	1.26713e-08	6.53837e-06	1	-3.87914	-14.7143	2.11993e-09	2.84126e-07	-1	7.24753	3.36839	6.40182	6.83115
1455587_at	Fam167b	family with sequence similarity 167, member B	230766	-1.74319	-3.34774	9.68779e-08	3.05004e-05	-1	-1.67843	-3.20079	1.68834e-07	3.87669e-05	-1	1.3236	2.50289	4.46625e-06	6.69614e-05	1	3.6234	4.947	3.20381	3.26857
1457909_at	Dna2	DNA replication helicase 2 homolog (yeast)	327762	-1.5716	-2.97235	9.75303e-08	3.05004e-05	-1	-1.16231	-2.23815	6.30227e-06	0.000313695	-1	1.45995	2.75099	2.85244e-07	8.97834e-06	1	4.87867	6.33862	4.76702	5.17631
1439776_at	Ogfod1	2-oxoglutarate and iron-dependent oxygenase domain containing 1	270086	-1.46464	-2.75994	1.07494e-07	3.32802e-05	-1	-1.55841	-2.94528	4.26001e-08	1.60208e-05	-1	1.42449	2.68419	1.61572e-07	5.97643e-06	1	2.29935	3.72383	2.25919	2.16543
1448872_at	Reg3g	regenerating islet-derived 3 gamma	19695	-4.43523	-21.634	1.09083e-07	3.34377e-05	-1	-4.43523	-21.634	1.09083e-07	3.01536e-05	-1	4.43523	21.634	1.09083e-07	4.60738e-06	1	2.01891	6.45414	2.01891	2.01891
1422703_at	Gyk	glycerol kinase	14933	-1.18729	-2.27725	1.11074e-07	3.37144e-05	-1	-1.40847	-2.65455	8.29528e-09	5.03572e-06	-1	1.92201	3.78951	5.32659e-11	2.09414e-08	1	2.81729	4.73931	3.55202	3.33084
1425137_a_at	H2-Q10	histocompatibility 2, Q region locus 10	15007	-3.07686	-8.43777	1.12915e-07	3.39402e-05	-1	-2.87741	-7.34829	2.98868e-07	5.34853e-05	-1	3.21374	9.27754	5.91735e-08	2.96442e-06	1	2.75795	5.97169	2.89483	3.09428
1430321_at	Krba1	KRAB-A domain containing 1	77827	1.70588	3.26229	1.15039e-07	3.42461e-05	1	1.86627	3.64588	2.99803e-08	1.26416e-05	1	-2.12645	-4.36641	3.95195e-09	4.49824e-07	-1	4.24916	2.12271	3.8286	3.98898
1455251_at	Itga1	integrin alpha 1	109700	-1.87055	-3.65671	1.26567e-07	3.72501e-05	-1	-1.37753	-2.59823	8.32341e-06	0.000362437	-1	0.46537	1.38067	0.0535646	0.100824	0	7.57647	8.04184	6.17129	6.66431
1426181_a_at	Il24	interleukin 24	93672	-4.75898	-27.0766	1.31437e-07	3.80309e-05	-1	-4.75898	-27.0766	1.31437e-07	3.39108e-05	-1	4.75898	27.0766	1.31437e-07	5.22375e-06	1	2.01891	6.77788	2.01891	2.01891
1431084_x_at	1810014B01Rik	RIKEN cDNA 1810014B01 gene	66263	1.18545	2.27435	1.3612e-07	3.90211e-05	1	1.00598	2.00831	1.38617e-06	0.000126223	1	-1.71788	-3.28953	4.20143e-10	8.33822e-08	-1	6.35524	4.63736	5.82281	5.64334
1448451_at	Ak2	adenylate kinase 2	11637	-1.05119	-2.07224	1.44405e-07	4.10162e-05	-1	-0.72782	-1.65613	1.98699e-05	0.000609685	0	1.03109	2.04357	1.91298e-07	6.72257e-06	1	11.042	12.0731	11.0219	11.3453
1419762_at	Ubd	ubiquitin D	24108	-5.4157	-42.6863	1.51722e-07	4.23065e-05	-1	-4.47825	-22.2888	2.17227e-06	0.000165646	-1	6.0398	65.7901	2.98296e-08	1.83551e-06	1	3.36256	9.40236	3.98666	4.92411
1457027_at	Dhtkd1	dehydrogenase E1 and transketolase domain containing 1	209692	1.78835	3.4542	1.53047e-07	4.23065e-05	1	2.23371	4.70343	5.20749e-09	3.63063e-06	1	-2.57574	-5.96176	5.29394e-10	9.93336e-08	-1	8.06433	5.4886	7.27695	7.72231
1455965_at	Adamts4	a disintegrin-like and metallopeptidase (reprolysin type) with thrombospondin type 1 motif, 4	240913	-3.1117	-8.644	1.57355e-07	4.27343e-05	-1	-2.33308	-5.0388	8.00631e-06	0.000351596	-1	0.4058	1.32482	0.300534	0.396449	0	8.89662	9.30242	6.19072	6.96934
1435265_at	Fbxo32	F-box protein 32	67731	1.75707	3.38011	1.64967e-07	4.37008e-05	1	2.26572	4.80895	3.41259e-09	2.70907e-06	1	-2.46168	-5.50859	9.02261e-10	1.44736e-07	-1	10.2797	7.81797	9.57504	10.0837
1455961_at				2.03466	4.09727	1.65148e-07	4.37008e-05	1	1.9331	3.81874	3.45494e-07	5.78189e-05	1	-2.58539	-6.00178	4.31216e-09	4.76802e-07	-1	8.73892	6.15353	8.18819	8.08662
1442514_a_at				1.99154	3.97661	1.71857e-07	4.50906e-05	1	1.80983	3.50601	6.72343e-07	8.17088e-05	1	-1.68282	-3.21056	1.82262e-06	3.48538e-05	-1	11.3212	9.6384	11.6299	11.4482
1430735_at	Patl2	protein associated with topoisomerase II homolog 2 (yeast)	67578	1.01423	2.01982	1.75705e-07	4.57129e-05	1	0.360489	1.28386	0.00979047	0.0385542	0	0.0177921	1.01241	0.888452	0.922366	0	2.22886	2.24665	3.26088	2.60714
1453168_at	1700029J07Rik	RIKEN cDNA 1700029J07 gene	69479	2.41848	5.34607	1.77999e-07	4.58886e-05	1	2.89804	7.45415	1.17104e-08	6.14497e-06	1	-3.57598	-11.9255	4.08262e-10	8.1547e-08	-1	7.05615	3.48018	5.89866	6.37822
1429299_at	Ddah1	dimethylarginine dimethylaminohydrolase 1	69219	-2.14246	-4.41514	1.80712e-07	4.58886e-05	-1	-2.00383	-4.01064	4.71209e-07	6.91405e-05	-1	1.9353	3.82457	7.67142e-07	1.87161e-05	1	3.59083	5.52613	3.38367	3.5223
1427921_s_at	2310061C15Rik	RIKEN cDNA 2310061C15 gene	66531	-1.13125	-2.19048	1.80827e-07	4.58886e-05	-1	-1.27358	-2.41761	3.10324e-08	1.26416e-05	-1	0.845399	1.79676	9.40725e-06	0.000115667	0	8.971	9.8164	8.68515	8.54282
1439501_at	Micu1	mitochondrial calcium uptake 1	216001	1.80954	3.50529	1.91291e-07	4.7761e-05	1	1.76463	3.39786	2.74925e-07	5.19005e-05	1	-1.84633	-3.59585	1.42666e-07	5.46452e-06	-1	9.68678	7.84045	9.64998	9.60507
1449976_a_at	Gpr35	G protein-coupled receptor 35	64095	-2.23419	-4.705	1.94901e-07	4.82732e-05	-1	-2.06019	-4.17042	6.18881e-07	7.91421e-05	-1	2.86581	7.28945	4.44868e-09	4.81578e-07	1	7.76456	10.6304	8.39617	8.57018
1458444_at	Gm20204	predicted gene, 20204	100504395	2.06149	4.17417	1.97806e-07	4.86037e-05	1	2.86796	7.30033	1.23691e-09	1.27649e-06	1	-2.83071	-7.11424	1.52671e-09	2.21911e-07	-1	9.5862	6.75549	8.81698	9.62345
1428956_at	Tmem177	transmembrane protein 177	66343	1.86188	3.63482	2.1728e-07	5.29685e-05	1	1.86735	3.64861	2.08265e-07	4.53832e-05	1	-2.21842	-4.65384	1.58181e-08	1.18578e-06	-1	7.26873	5.05031	6.9122	6.91766
1458519_at	Gm19865	predicted gene, 19865	100503742	3.30774	9.90216	2.20111e-07	5.32394e-05	1	3.27133	9.65537	2.58196e-07	4.99609e-05	1	3.93476	15.2926	1.64446e-08	1.21439e-06	1	2.72047	6.65523	9.96297	9.92656
1425396_a_at	Lck	lymphocyte protein tyrosine kinase	16818	-2.5454	-5.83772	2.27876e-07	5.39693e-05	-1	-2.04977	-4.14041	4.45124e-06	0.000262445	-1	4.3889	20.9503	4.22378e-11	1.84181e-08	1	4.54359	8.93248	6.38708	6.88271
1421291_at	Il18rap	interleukin 18 receptor accessory protein	16174	-3.37722	-10.3907	2.28421e-07	5.39693e-05	-1	-2.70464	-6.51897	4.79119e-06	0.000270685	-1	4.52334	22.9964	2.66673e-09	3.35617e-07	1	2.26115	6.78448	3.40727	4.07984
1435332_at	Htr7	5-hydroxytryptamine (serotonin) receptor 7	15566	-3.0383	-8.21525	2.30747e-07	5.39693e-05	-1	-3.01966	-8.10974	2.52157e-07	4.91829e-05	-1	3.55453	11.7495	2.23316e-08	1.50361e-06	1	3.22159	6.77612	3.73781	3.75646
1436966_at	Peli2	pellino 2	93834	1.87146	3.65903	2.30963e-07	5.39693e-05	1	2.48047	5.58079	3.18875e-09	2.66523e-06	1	-3.33791	-10.1114	2.4256e-11	1.31748e-08	-1	8.47142	5.13351	7.00497	7.61398
1429862_at	Pla2g4e	phospholipase A2, group IVE	329502	-2.10215	-4.2935	2.31845e-07	5.39693e-05	-1	-1.57091	-2.97092	1.16531e-05	0.000446508	-1	3.50248	11.3332	7.6545e-11	2.5211e-08	1	9.19808	12.7006	10.5984	11.1296
1454995_at	Ddah1	dimethylarginine dimethylaminohydrolase 1	69219	-1.84762	-3.59905	2.45794e-07	5.67882e-05	-1	-1.57918	-2.98799	2.17758e-06	0.000165646	-1	2.38288	5.21576	5.25894e-09	5.36525e-07	1	9.6494	12.0323	10.1847	10.4531
1423306_at	2010002N04Rik	RIKEN cDNA 2010002N04 gene	106878	-1.4888	-2.80656	2.47623e-07	5.67882e-05	-1	-1.40301	-2.64452	5.75709e-07	7.74955e-05	-1	2.03977	4.11181	2.03045e-09	2.74483e-07	1	9.54241	11.5822	10.0934	10.1792
1434736_at	Hlf	hepatic leukemia factor	217082	3.09563	8.54826	2.51587e-07	5.69523e-05	1	3.39685	10.533	6.4433e-08	2.12218e-05	1	-2.48452	-5.59649	5.07965e-06	7.33859e-05	-1	8.95978	6.47526	9.57089	9.8721
1420407_at	Ltb4r1	leukotriene B4 receptor 1	16995	-2.02208	-4.06169	2.5236e-07	5.69523e-05	-1	-1.18624	-2.27558	0.000194539	0.00263125	-1	1.50618	2.84058	1.30421e-05	0.000148723	1	8.66526	10.1714	8.14936	8.98521
1417686_at	Lgals12	lectin, galactose binding, soluble 12	56072	1.29734	2.45776	2.55674e-07	5.69523e-05	1	1.23368	2.35167	5.23143e-07	7.27585e-05	1	-2.59837	-6.05602	3.79381e-12	3.91521e-09	-1	9.49244	6.89407	8.19141	8.12775
1441413_at				2.70462	6.51888	2.61877e-07	5.79122e-05	1	2.61554	6.12853	4.22375e-07	6.63668e-05	1	-3.10577	-8.60854	3.39066e-08	1.99952e-06	-1	6.5762	3.47043	6.17505	6.08597
1448786_at	Plbd1	phospholipase B domain containing 1	66857	-0.748062	-1.67954	2.73573e-07	5.98896e-05	0	-0.707572	-1.63305	6.02323e-07	7.83101e-05	0	1.28115	2.43032	5.85508e-11	2.21065e-08	1	12.1887	13.4698	12.7218	12.7623
1436100_at	Sh2d5	SH2 domain containing 5	230863	-3.51651	-11.444	2.74687e-07	5.98896e-05	-1	-3.71046	-13.0906	1.25983e-07	3.31136e-05	-1	3.59271	12.0646	2.01636e-07	6.95155e-06	1	2.88625	6.47896	2.96244	2.7685
1445938_at	5930427L02Rik	RIKEN cDNA 5930427L02 gene	402754	2.43378	5.40306	2.78862e-07	6.03746e-05	1	2.53065	5.7783	1.58537e-07	3.7468e-05	1	-2.00184	-4.00512	4.05615e-06	6.22311e-05	-1	8.03657	6.03472	8.4685	8.56537
1452595_at	Adamts4	a disintegrin-like and metallopeptidase (reprolysin type) with thrombospondin type 1 motif, 4	240913	-2.48216	-5.58733	2.81635e-07	6.05516e-05	-1	-1.65064	-3.13973	5.45048e-05	0.0011437	-1	0.1856	1.13729	0.564522	0.656067	0	9.4492	9.6348	7.15264	7.98416
1435058_x_at	Stxbp3a	syntaxin binding protein 3A	20912	1.30343	2.46815	3.01047e-07	6.38384e-05	1	0.0599482	1.04243	0.723524	0.837269	0	0.126217	1.09143	0.459047	0.557075	0	8.29969	8.42591	9.72934	8.48586
1437549_at	2810408I11Rik	RIKEN cDNA 2810408I11 gene	69941	-3.07438	-8.42325	3.12857e-07	6.58916e-05	-1	-3.63107	-12.3897	2.66972e-08	1.14798e-05	-1	2.82371	7.0798	1.03144e-06	2.31067e-05	1	3.28963	6.11333	3.03896	2.48227
1451385_at	Fam162a	family with sequence similarity 162, member A	70186	-0.821838	-1.76766	3.27128e-07	6.79723e-05	0	-0.636439	-1.55449	1.00806e-05	0.000403225	0	1.06409	2.09085	6.76306e-09	6.32581e-07	1	12.621	13.685	12.8632	13.0486
1435577_at	Dab1	disabled homolog 1 (Drosophila)	13131	4.02359	16.2637	3.3017e-07	6.79723e-05	1	4.06637	16.7533	2.83797e-07	5.26129e-05	1	-3.68162	-12.8315	1.14384e-06	2.47645e-05	-1	8.65634	4.97472	8.99831	9.04109
1435185_at	Lrrcc1	leucine rich repeat and coiled-coil domain containing 1	71710	1.21621	2.32335	3.31097e-07	6.79723e-05	1	0.892449	1.85632	1.97072e-05	0.000605893	0	-0.873733	-1.8324	2.53858e-05	0.000246532	0	7.76557	6.89184	8.10804	7.78429
1418932_at	Nfil3	nuclear factor, interleukin 3, regulated	18030	-2.00157	-4.00435	3.34447e-07	6.79723e-05	-1	-1.67272	-3.18816	3.89071e-06	0.000242776	-1	0.164003	1.12039	0.533086	0.62685	0	10.7078	10.8718	8.87021	9.19906
1433815_at	Jakmip1	janus kinase and microtubule interacting protein 1	76071	-1.94973	-3.86301	3.37058e-07	6.79723e-05	-1	-1.86427	-3.64083	6.34808e-07	8.00308e-05	-1	2.17363	4.51157	6.8964e-08	3.31027e-06	1	2.38081	4.55444	2.60471	2.69017
1441610_at	N28178	expressed sequence N28178	230085	1.77221	3.41577	3.37903e-07	6.79723e-05	1	1.78806	3.4535	2.97524e-07	5.34853e-05	1	-1.79502	-3.47021	2.81401e-07	8.89905e-06	-1	6.35174	4.55671	6.32892	6.34477
1440882_at	Lrp8	low density lipoprotein receptor-related protein 8, apolipoprotein e receptor	16975	-2.99794	-7.98859	3.38105e-07	6.79723e-05	-1	-2.67189	-6.37262	1.67344e-06	0.000139649	-1	2.38679	5.22993	7.32858e-06	9.67981e-05	1	4.95058	7.33737	4.33943	4.66548
1424672_at	Dmxl1	Dmx-like 1	240283	1.06816	2.09676	3.59963e-07	7.18457e-05	1	0.0908803	1.06502	0.519797	0.672866	0	-0.294265	-1.22626	0.0474119	0.0913026	0	9.08799	8.79373	9.86188	8.88461
1419075_s_at				-4.58781	-24.0474	3.62013e-07	7.18457e-05	-1	-4.61903	-24.5734	3.28648e-07	5.56008e-05	-1	8.89859	477.246	9.94986e-12	7.1639e-09	1	4.70479	13.6034	9.01557	8.98435
1416664_at	Cdc20	cell division cycle 20 homolog (S. cerevisiae)	107995	-2.24543	-4.74177	3.65693e-07	7.19825e-05	-1	-1.47396	-2.77783	7.73001e-05	0.0014342	-1	1.26351	2.40079	0.000382377	0.00197537	1	9.25067	10.5142	8.26875	9.04022
1421712_at	Sele	selectin, endothelial cell	20339	-2.55514	-5.87725	3.67353e-07	7.19825e-05	-1	-2.30901	-4.95542	1.50123e-06	0.000131151	-1	2.37998	5.20531	9.92736e-07	2.24836e-05	1	2.81863	5.19861	2.64347	2.8896
1459030_at	Bbox1	butyrobetaine (gamma), 2-oxoglutarate dioxygenase 1 (gamma-butyrobetaine hydroxylase)	170442	2.43338	5.40156	3.7137e-07	7.2312e-05	1	1.94736	3.85668	7.46143e-06	0.000339715	1	-1.3953	-2.63043	0.000321438	0.00172953	-1	9.30875	7.91345	10.3468	9.86081
1455694_at	Nbeal2	neurobeachin-like 2	235627	-1.48249	-2.79431	3.83387e-07	7.41853e-05	-1	-0.878409	-1.83835	0.000236831	0.00295776	0	2.29601	4.91098	4.57962e-10	8.86157e-08	1	6.62155	8.91756	7.43507	8.03915
1451664_x_at	Klra7	killer cell lectin-like receptor, subfamily A, member 7	16638	-1.96555	-3.9056	3.98312e-07	7.59647e-05	-1	-2.05533	-4.15638	2.09985e-07	4.53832e-05	-1	2.41211	5.32251	1.92557e-08	1.3549e-06	1	2.70891	5.12102	3.15547	3.06569
1428823_at	Hddc2	HD domain containing 2	69692	-1.13049	-2.18933	3.99944e-07	7.59647e-05	-1	-0.89826	-1.86382	8.71917e-06	0.00036998	0	1.09246	2.13237	6.47554e-07	1.6433e-05	1	11.2619	12.3543	11.2238	11.4561
1429430_at	Pcmtd1	protein-L-isoaspartate (D-aspartate) O-methyltransferase domain containing 1	319263	1.08277	2.1181	4.04316e-07	7.63271e-05	1	0.516047	1.43003	0.00179812	0.0115569	0	-0.26848	-1.20454	0.0736709	0.130304	0	7.96064	7.69216	8.77493	8.20821
1419000_at	Cpxm2	carboxypeptidase X 2 (M14 family)	55987	1.6418	3.12055	4.10573e-07	7.70385e-05	1	1.74637	3.35513	1.69042e-07	3.87669e-05	1	-2.67393	-6.38165	2.16899e-10	5.12611e-08	-1	10.2037	7.5298	9.1716	9.27617
1423286_at	Cbln1	cerebellin 1 precursor protein	12404	-2.92761	-7.6085	4.2498e-07	7.90809e-05	-1	-2.92732	-7.60698	4.25575e-07	6.63668e-05	-1	2.92761	7.6085	4.2498e-07	1.1994e-05	1	2.01891	4.94652	2.01891	2.0192
1435952_at	Gm19597	predicted gene, 19597	100503222	1.30836	2.47659	4.26567e-07	7.90809e-05	1	1.03328	2.04667	9.96139e-06	0.000402092	1	-1.49861	-2.82571	5.89607e-08	2.96335e-06	-1	9.11341	7.6148	8.92316	8.64807
1426600_at	Slc2a1	solute carrier family 2 (facilitated glucose transporter), member 1	20525	-0.855736	-1.80968	4.32687e-07	7.9738e-05	0	-0.34805	-1.27284	0.00611517	0.0273915	0	1.13096	2.19004	6.67309e-09	6.26057e-07	1	11.8914	13.0224	12.1666	12.6743
1449235_at	Fasl	Fas ligand (TNF superfamily, member 6)	14103	-2.91413	-7.53774	4.36523e-07	7.99689e-05	-1	-2.74081	-6.68445	1.02694e-06	0.00010598	-1	4.47872	22.2961	6.0284e-10	1.06839e-07	1	2.03937	6.51809	3.60396	3.77728
1455699_at	Bcat1	branched chain aminotransferase 1, cytosolic	12035	-2.91542	-7.54446	4.40351e-07	8.01957e-05	-1	-2.33843	-5.05751	8.43698e-06	0.000364412	-1	2.53509	5.79614	2.97994e-06	4.96015e-05	1	2.42238	4.95747	2.04206	2.61905
1427600_at				1.61637	3.06603	4.54875e-07	8.23562e-05	1	1.06891	2.09785	8.44073e-05	0.00151313	1	-1.11395	-2.16438	5.32652e-05	0.000437201	-1	8.75618	7.64223	9.2586	8.71113
1436509_at	Mlec	malectin	109154	-1.41359	-2.66399	4.58629e-07	8.25533e-05	-1	-1.57306	-2.97536	9.7761e-08	2.80248e-05	-1	0.799668	1.7407	0.000423804	0.00213418	0	9.47487	10.2745	8.86096	8.70148
1417193_at	Sod2	superoxide dismutase 2, mitochondrial	20656	-1.05955	-2.08428	4.66046e-07	8.34033e-05	-1	-1.0183	-2.02553	8.12342e-07	9.12699e-05	-1	1.15059	2.22005	1.4244e-07	5.46452e-06	1	11.8218	12.9724	11.9128	11.9541
1449399_a_at	Il1b	interleukin 1 beta	16176	-2.57131	-5.94348	4.74159e-07	8.43676e-05	-1	-3.59828	-12.1113	2.99607e-09	2.57662e-06	-1	5.78226	55.0343	1.08709e-12	1.47999e-09	1	7.67723	13.4595	10.8882	9.86122
1435578_s_at	Dab1	disabled homolog 1 (Drosophila)	13131	3.74032	13.3644	4.79249e-07	8.4786e-05	1	3.68733	12.8824	5.8576e-07	7.78332e-05	1	-3.50438	-11.3481	1.18513e-06	2.53045e-05	-1	9.12916	5.62478	9.3651	9.31211
1420541_at	Rdh16	retinol dehydrogenase 16	19683	-1.66942	-3.18086	4.87949e-07	8.51207e-05	-1	-1.27971	-2.4279	1.61707e-05	0.000543192	-1	2.06879	4.19534	2.06605e-08	1.41682e-06	1	2.12569	4.19448	2.52506	2.91478
1458900_at				3.1866	9.10461	4.89669e-07	8.51207e-05	1	2.9694	7.83209	1.30326e-06	0.000120025	1	-3.12975	-8.75285	6.30474e-07	1.60786e-05	-1	9.4893	6.35954	9.54614	9.32894
1427268_at	Flg	filaggrin	14246	1.48383	2.79691	4.91216e-07	8.51207e-05	1	1.57552	2.98043	2.08561e-07	4.53832e-05	1	0.0819167	1.05842	0.681814	0.757	0	11.612	11.6939	13.1778	13.2694
1434158_at	Gmds	GDP-mannose 4, 6-dehydratase	218138	-1.21503	-2.32145	4.92138e-07	8.51207e-05	-1	-0.898467	-1.86408	2.51016e-05	0.000710871	0	0.713067	1.63929	0.000310996	0.00168565	0	9.17944	9.8925	8.67748	8.99404
1421007_at	Col4a6	collagen, type IV, alpha 6	94216	3.14119	8.82249	4.97883e-07	8.56358e-05	1	3.1857	9.09893	4.0807e-07	6.51229e-05	1	-3.8475	-14.395	2.52431e-08	1.63158e-06	-1	9.64033	5.79283	8.93402	8.97853
1440173_x_at	Selp	selectin, platelet	20344	-1.82958	-3.55433	5.03825e-07	8.59513e-05	-1	-1.57144	-2.97201	3.96823e-06	0.000245713	-1	1.77514	3.42272	7.68721e-07	1.87398e-05	1	3.82522	5.60037	3.77079	4.02893
1418803_a_at	Fasl	Fas ligand (TNF superfamily, member 6)	14103	-2.55572	-5.87961	5.34399e-07	8.95455e-05	-1	-2.60675	-6.09131	4.04201e-07	6.48398e-05	-1	2.76798	6.81152	1.70601e-07	6.17035e-06	1	2.03208	4.80006	2.24434	2.19331
1441589_at				-2.16349	-4.47999	5.37967e-07	8.95455e-05	-1	-1.62363	-3.08149	2.27015e-05	0.000661808	-1	3.3228	10.0061	7.75636e-10	1.32177e-07	1	2.54598	5.86879	3.70529	4.24516
1418991_at	Bak1	BCL2-antagonist/killer 1	12018	-1.17158	-2.25259	5.43326e-07	8.99539e-05	-1	-1.17363	-2.25578	5.30189e-07	7.32595e-05	-1	1.3876	2.61644	4.61599e-08	2.47251e-06	1	8.99598	10.3836	9.212	9.20996
1452408_at				1.96866	3.91405	5.56608e-07	9.16627e-05	1	-3.23014	-9.38357	2.73894e-10	4.69873e-07	-1	3.57004	11.8765	5.19104e-11	2.0872e-08	1	2.13872	5.70875	7.67742	2.47862
1423952_a_at	Krt7	keratin 7	110310	1.77397	3.41995	5.73012e-07	9.3782e-05	1	1.22882	2.34376	6.0503e-05	0.0012235	1	-0.796627	-1.73703	0.00347593	0.011158	0	4.61969	3.82306	5.59704	5.05189
1434992_at	Zfr2	zinc finger RNA binding protein 2	103406	1.66853	3.1789	5.8054e-07	9.3782e-05	1	1.90992	3.75789	8.2476e-08	2.4812e-05	1	-2.20964	-4.62561	8.95779e-09	7.79026e-07	-1	7.22781	5.01817	6.6867	6.92809
1435092_at	Arl4a	ADP-ribosylation factor-like 4A	11861	1.17443	2.25704	5.81222e-07	9.3782e-05	1	0.626513	1.54383	0.000853813	0.00695999	0	-0.772736	-1.70851	0.000107785	0.000747869	0	11.5348	10.7621	11.9365	11.3886
1421721_a_at	Arnt	aryl hydrocarbon receptor nuclear translocator	11863	-1.33643	-2.52526	5.82761e-07	9.3782e-05	-1	-1.19719	-2.29292	2.61564e-06	0.00018622	-1	1.14454	2.21075	4.71364e-06	6.94798e-05	1	4.71924	5.86378	4.52735	4.6666
1429786_a_at	Zwint	ZW10 interactor	52696	-0.882294	-1.8433	5.91964e-07	9.39518e-05	0	-0.896923	-1.86209	4.6972e-07	6.91405e-05	0	1.10669	2.15352	2.11824e-08	1.44133e-06	1	9.19033	10.297	9.41473	9.4001
1419321_at	F7	coagulation factor VII	14068	-1.9095	-3.75678	5.92452e-07	9.39518e-05	-1	-1.41271	-2.66237	2.91649e-05	0.00078372	-1	3.54915	11.7058	3.69697e-11	1.73421e-08	1	3.26022	6.80938	4.89988	5.39666
1416939_at	Ppa1	pyrophosphatase (inorganic) 1	67895	-1.13932	-2.20277	5.94785e-07	9.39518e-05	-1	-0.821049	-1.76669	3.9743e-05	0.000950885	0	0.608272	1.52443	0.000860225	0.00370618	0	11.7644	12.3727	11.2333	11.5516
1419458_at	Rgnef	Rho-guanine nucleotide exchange factor	110596	2.5945	6.03978	5.99006e-07	9.41382e-05	1	2.8726	7.32386	1.39247e-07	3.45523e-05	1	-3.51503	-11.4322	6.49732e-09	6.2269e-07	-1	7.23056	3.71553	6.31003	6.58814
1451314_a_at	Vcam1	vascular cell adhesion molecule 1	22329	-2.92661	-7.6032	6.1853e-07	9.64723e-05	-1	-1.53531	-2.89851	0.00102983	0.0079431	-1	3.43447	10.8113	6.08825e-08	3.02071e-06	1	3.96431	7.39878	4.47217	5.86346
1425793_a_at	Rorc	RAR-related orphan receptor gamma	19885	1.83769	3.57438	6.2009e-07	9.64723e-05	1	2.12068	4.34899	7.84153e-08	2.4037e-05	1	-1.63628	-3.10864	3.00481e-06	4.97562e-05	-1	5.22818	3.5919	5.42959	5.71258
1429156_at	Cenpw	centromere protein W	66311	-1.89596	-3.7217	6.35742e-07	9.79232e-05	-1	-1.99602	-3.98899	3.07143e-07	5.35621e-05	-1	1.7829	3.44118	1.48258e-06	2.98057e-05	1	6.63095	8.41385	6.51789	6.41783
1439030_at	Gmppb	GDP-mannose pyrophosphorylase B	331026	-1.36096	-2.56857	6.44506e-07	9.87817e-05	-1	-1.31065	-2.48053	1.08579e-06	0.000109413	-1	1.17564	2.25893	4.62763e-06	6.86824e-05	1	10.3145	11.4902	10.1292	10.1795
1439377_x_at	Cdc20	cell division cycle 20 homolog (S. cerevisiae)	107995	-1.67809	-3.20005	6.59413e-07	9.96625e-05	-1	-1.18203	-2.26895	5.61065e-05	0.00116425	-1	0.964421	1.95128	0.000466555	0.00229862	0	10.6305	11.595	9.91688	10.4129
1454037_a_at	Flt1	FMS-like tyrosine kinase 1	14254	-1.5162	-2.86036	6.63195e-07	9.96725e-05	-1	-1.00569	-2.0079	0.000109374	0.00180888	-1	1.05711	2.08076	6.32414e-05	0.000499733	1	2.83868	3.89579	2.37959	2.8901
1455848_at	Tmprss11a	transmembrane protease, serine 11a	194597	-3.86397	-14.5603	6.72235e-07	0.000100098	-1	-4.2569	-19.1185	1.68921e-07	3.87669e-05	-1	4.26023	19.1628	1.67003e-07	6.09718e-06	1	2.02125	6.28148	2.41752	2.02459
1420589_at	Has3	hyaluronan synthase 3	15118	-2.91522	-7.54342	6.72492e-07	0.000100098	-1	-2.69216	-6.4628	1.99843e-06	0.000155848	-1	2.6171	6.13514	2.91124e-06	4.8852e-05	1	4.00665	6.62375	3.70853	3.93159
1434497_at	4933431E20Rik	RIKEN cDNA 4933431E20 gene	329735	1.83229	3.56102	6.91011e-07	0.000101903	1	1.87283	3.6625	5.0854e-07	7.15655e-05	1	-2.33228	-5.036	2.00445e-08	1.39143e-06	-1	9.84236	7.51008	9.34237	9.38291
1421802_at	Ear1	eosinophil-associated, ribonuclease A family, member 1	13586	-3.51288	-11.4152	6.97869e-07	0.000101903	-1	-2.18299	-4.54093	0.000224971	0.00286628	-1	3.9114	15.047	1.50469e-07	5.702e-06	1	2.44858	6.35999	2.84711	4.177
1450200_s_at				-2.0593	-4.16783	7.00706e-07	0.000101903	-1	-1.74819	-3.35938	6.25057e-06	0.000312629	-1	2.81755	7.04964	6.63936e-09	6.24786e-07	1	4.3291	7.14665	5.08735	5.39845
1452389_at	Cd27	CD27 antigen	21940	-2.34118	-5.06717	7.01076e-07	0.000101903	-1	-1.78465	-3.44534	2.36117e-05	0.000681919	-1	3.64673	12.5249	8.38886e-10	1.37418e-07	1	3.81642	7.46315	5.12197	5.67851
1457257_x_at	Pvrl3	poliovirus receptor-related 3	58998	2.2427	4.73283	7.11025e-07	0.000102388	1	1.94711	3.856	4.74886e-06	0.000269276	1	-4.79124	-27.689	4.32932e-12	4.06169e-09	-1	7.35562	2.56438	4.80708	4.51148
1434224_at	Tbl2	transducin (beta)-like 2	27368	-1.19185	-2.28446	7.19499e-07	0.000102923	-1	-0.720767	-1.64806	0.000302237	0.00343512	0	0.513965	1.42797	0.00524253	0.015487	0	9.75423	10.2682	9.07634	9.54743
1450269_a_at	Pfkl	phosphofructokinase, liver, B-type	18641	-1.29566	-2.45489	7.2139e-07	0.000102923	-1	-0.617333	-1.53404	0.00250656	0.0146294	0	1.06289	2.08911	9.8886e-06	0.000120012	1	10.1086	11.1715	9.87582	10.5541
1430612_at	1810033B17Rik	RIKEN cDNA 1810033B17 gene	69189	-3.17344	-9.02198	7.28959e-07	0.000103393	-1	-2.93946	-7.67126	2.07412e-06	0.000160137	-1	4.76898	27.2651	1.56593e-09	2.23994e-07	1	6.07916	10.8481	7.6747	7.90868
1444262_at	1110017F19Rik	RIKEN cDNA 1110017F19 gene	68528	2.12331	4.35694	7.31364e-07	0.000103393	1	2.18987	4.56266	4.74551e-07	6.93023e-05	1	-0.694472	-1.61829	0.0272561	0.0584707	0	6.67454	5.98007	8.10338	8.16994
1449105_at	Sh2d2a	SH2 domain protein 2A	27371	-2.29045	-4.8921	7.42138e-07	0.000104382	-1	-2.49733	-5.64638	2.17675e-07	4.59722e-05	-1	4.31906	19.9603	3.80551e-11	1.75849e-08	1	3.95368	8.27275	5.98229	5.77542
1429808_at	Wdr65	WD repeat domain 65	68625	2.48329	5.59171	7.51264e-07	0.000104382	1	2.68216	6.41814	2.52587e-07	4.91829e-05	1	-2.0116	-4.0323	1.19935e-05	0.000139437	-1	9.53397	7.52237	10.0057	10.2045
1436203_a_at	1110059G02Rik	RIKEN cDNA 1110059G02 gene	68786	0.999854	1.9998	7.62064e-07	0.000105328	0	0.946585	1.9273	1.61399e-06	0.000137656	0	-1.48275	-2.79481	2.03912e-09	2.74483e-07	-1	11.789	10.3063	11.3061	11.2529
1419209_at	Cxcl1	chemokine (C-X-C motif) ligand 1	14825	-3.75615	-13.5119	7.67233e-07	0.000105571	-1	-2.8179	-7.05137	3.07859e-05	0.000808952	-1	5.57717	47.7414	2.01463e-09	2.73565e-07	1	4.10244	9.67961	5.92345	6.86171
1419135_at	Ltb	lymphotoxin B	16994	-1.49499	-2.81861	7.71492e-07	0.000105688	-1	-1.26806	-2.40837	6.90035e-06	0.00032635	-1	1.99401	3.98342	1.10068e-08	9.18523e-07	1	2.53653	4.53054	3.03555	3.26248
1457017_at	Fam82b	family with sequence similarity 82, member B	66302	1.4719	2.77387	7.90669e-07	0.000107184	1	1.15392	2.22517	1.87135e-05	0.00058735	1	-1.56032	-2.9492	3.48038e-07	1.0431e-05	-1	7.6445	6.08418	7.55608	7.23809
1438288_x_at	1110059G02Rik	RIKEN cDNA 1110059G02 gene	68786	0.980871	1.97366	7.97865e-07	0.000107184	0	0.886458	1.84863	3.13491e-06	0.000211453	0	-1.49247	-2.81371	1.42347e-09	2.10864e-07	-1	11.9869	10.4945	11.4753	11.3809
1420184_at	Lor	loricrin	16939	1.59524	3.02145	7.97966e-07	0.000107184	1	1.99431	3.98427	3.0904e-08	1.26416e-05	1	-1.70301	-3.2558	3.1777e-07	9.70019e-06	-1	13.3638	11.6608	13.256	13.6551
1420646_at	Nus1	nuclear undecaprenyl pyrophosphate synthase 1 homolog (S. cerevisiae)	52014	-1.16072	-2.23569	7.984e-07	0.000107184	-1	-1.31445	-2.48708	1.3535e-07	3.43478e-05	-1	1.75548	3.37639	1.56998e-09	2.23994e-07	1	6.6399	8.39538	7.23466	7.08093
1431893_a_at	Pdss1	prenyl (solanesyl) diphosphate synthase, subunit 1	56075	-1.67791	-3.19965	8.03186e-07	0.000107184	-1	-1.418	-2.67214	7.50047e-06	0.000340491	-1	1.35892	2.56494	1.27597e-05	0.000146365	1	9.96204	11.321	9.64305	9.90297
1424509_at	Cd177	CD177 antigen	68891	-3.73653	-13.3293	8.09896e-07	0.000107615	-1	-3.71143	-13.0994	8.89074e-07	9.65815e-05	-1	3.73667	13.3306	8.09486e-07	1.94454e-05	1	2.01893	5.75559	2.01906	2.04416
1424991_s_at				-1.43313	-2.70032	8.33636e-07	0.000110296	-1	-1.51587	-2.85972	3.79184e-07	6.2114e-05	-1	0.975784	1.96671	9.84749e-05	0.000696553	0	10.8495	11.8253	10.3921	10.3094
1427376_a_at	Map4k5	mitogen-activated protein kinase kinase kinase kinase 5	399510	-1.20695	-2.30849	8.53035e-07	0.000112383	-1	-0.978714	-1.97071	1.3256e-05	0.000481754	0	1.89846	3.72815	9.00283e-10	1.44736e-07	1	8.1412	10.0397	8.83271	9.06094
1456211_at	Nlrp10	NLR family, pyrin domain containing 10	244202	1.39067	2.62201	8.90525e-07	0.000116332	1	1.44954	2.73121	4.99318e-07	7.09123e-05	1	-1.48715	-2.80334	3.47312e-07	1.04295e-05	-1	12.4309	10.9437	12.3344	12.3933
1428326_s_at	Hrsp12	heat-responsive protein 12	15473	1.07849	2.11182	9.14949e-07	0.000118219	1	0.662711	1.58306	0.000306341	0.00346396	0	-1.26476	-2.40288	9.35323e-08	4.08429e-06	-1	9.99729	8.73252	9.81101	9.39523
1424409_at	Cldn23	claudin 23	71908	1.91515	3.77152	9.16426e-07	0.000118219	1	1.75164	3.36741	3.05536e-06	0.000208035	1	-2.00634	-4.01761	4.78768e-07	1.32109e-05	-1	10.9638	8.95745	10.8726	10.7091
1436033_at	BC031353	cDNA sequence BC031353	235493	0.973018	1.96294	9.20299e-07	0.000118226	0	1.33502	2.52279	8.64342e-09	5.04906e-06	1	-0.960025	-1.94534	1.10723e-06	2.42261e-05	0	11.784	10.824	11.797	12.159
1449084_s_at	Sh3d19	SH3 domain protein D19	27059	0.71249	1.63863	9.24562e-07	0.000118283	0	0.714593	1.64102	8.87687e-07	9.65815e-05	0	-1.02334	-2.03262	4.23448e-09	4.70882e-07	-1	12.9259	11.9025	12.615	12.6171
1427740_a_at	Gm12606	predicted gene 12606	100379609	-3.00053	-8.00296	9.32053e-07	0.000118669	-1	-3.11468	-8.66187	5.54297e-07	7.55993e-05	-1	3.45376	10.9568	1.25591e-07	5.04974e-06	1	3.8836	7.33736	4.33683	4.22268
1425947_at	Ifng	interferon gamma	15978	-3.07922	-8.45155	9.3525e-07	0.000118669	-1	-3.53178	-11.5657	1.32779e-07	3.3974e-05	-1	4.30547	19.7731	6.54837e-09	6.2269e-07	1	2.21682	6.52228	3.44307	2.99051
1453285_at	Tmem88	transmembrane protein 88	67020	-1.01102	-2.01533	9.49043e-07	0.000119928	-1	-0.249766	-1.18901	0.0919389	0.194349	0	-0.253202	-1.19185	0.0878842	0.150044	0	8.48915	8.23595	7.22493	7.98619
1424511_at	Aurka	aurora kinase A	20878	-2.01081	-4.03009	9.675e-07	0.000121729	-1	-1.67443	-3.19192	1.0687e-05	0.000418821	-1	0.792799	1.73243	0.0108571	0.0277912	0	8.66886	9.46166	7.45085	7.78723
1447891_at				0.974373	1.96479	9.79301e-07	0.000121729	0	1.07385	2.10504	2.48926e-07	4.91829e-05	1	-0.481409	-1.39611	0.00224067	0.00788488	0	11.2177	10.7363	11.7107	11.8102
1422905_s_at	Fmo2	flavin containing monooxygenase 2	55990	2.81187	7.02194	9.81026e-07	0.000121729	1	3.20953	9.2505	1.49967e-07	3.62733e-05	1	-3.64255	-12.4887	2.25682e-08	1.51236e-06	-1	8.85572	5.21317	8.02504	8.4227
1456158_at	2610109H07Rik	RIKEN cDNA 2610109H07 gene	70433	-2.21396	-4.63945	9.8337e-07	0.000121729	-1	-2.21396	-4.63945	9.8337e-07	0.000102855	-1	2.22236	4.66655	9.33366e-07	2.14211e-05	1	2.41208	4.63443	2.42048	2.42048
1427919_at	Srpx2	sushi-repeat-containing protein, X-linked 2	68792	-1.96977	-3.91705	9.84625e-07	0.000121729	-1	-0.963927	-1.95061	0.00242451	0.0143126	0	0.829406	1.77695	0.00719701	0.0199828	0	7.45709	8.28649	6.31673	7.32257
1443960_at	Asrgl1	asparaginase like 1	66514	1.08391	2.11977	9.8714e-07	0.000121729	1	1.13976	2.20344	4.90164e-07	7.02569e-05	1	-1.28669	-2.43967	8.47474e-08	3.82475e-06	-1	7.41725	6.13057	7.21448	7.27032
1445701_at	Atp2b4	ATPase, Ca++ transporting, plasma membrane 4	381290	1.1329	2.193	9.90821e-07	0.000121729	1	0.796601	1.737	7.94033e-05	0.00145205	0	-0.767366	-1.70216	0.000119191	0.000807829	0	9.91399	9.14662	10.2795	9.94322
1445186_at	Stc2	stanniocalcin 2	20856	-1.52177	-2.87143	1.02258e-06	0.000124642	-1	-0.824345	-1.77073	0.00106811	0.00815361	0	1.24832	2.37564	1.35209e-05	0.000152871	1	6.76014	8.00845	6.48668	7.18411
1424266_s_at	Ces1f	carboxylesterase 1F	234564	3.2266	9.36061	1.04233e-06	0.000126057	1	3.7369	13.3327	1.29272e-07	3.36324e-05	1	-4.02766	-16.3097	4.23904e-08	2.31058e-06	-1	7.06925	3.0416	6.2682	6.77849
1440171_x_at	1700049G17Rik	RIKEN cDNA 1700049G17 gene	73430	1.33524	2.52317	1.0511e-06	0.000126377	1	1.16897	2.24851	6.13325e-06	0.00030926	1	-1.65474	-3.14867	4.76955e-08	2.54535e-06	-1	8.39373	6.73898	8.07422	7.90795
1418460_at	Sh3d19	SH3 domain protein D19	27059	0.740059	1.67024	1.05314e-06	0.000126377	0	0.94446	1.92447	3.06674e-08	1.26416e-05	0	-1.15397	-2.22526	1.32664e-09	1.98646e-07	-1	11.0978	9.94384	10.6839	10.8883
1453119_at	Otud1	OTU domain containing 1	71198	1.23157	2.34822	1.06107e-06	0.000126837	1	1.51953	2.86698	5.15041e-08	1.81201e-05	1	-1.75732	-3.38068	5.499e-09	5.49629e-07	-1	12.4261	10.6688	11.9004	12.1883
1438337_x_at	Tmprss11g	transmembrane protease, serine 11g	320454	-3.64678	-12.5254	1.11023e-06	0.000131696	-1	-4.52563	-23.033	4.96087e-08	1.76539e-05	-1	5.01314	32.2928	1.03748e-08	8.77609e-07	1	2.07491	7.08805	3.44127	2.56242
1436122_at	Zfp667	zinc finger protein 667	384763	0.753519	1.6859	1.123e-06	0.000132198	0	1.06189	2.08767	7.1338e-09	4.5074e-06	1	-1.23906	-2.36045	6.05217e-10	1.06839e-07	-1	9.75374	8.51467	9.26819	9.57656
1435987_x_at	1110059G02Rik	RIKEN cDNA 1110059G02 gene	68786	1.05439	2.07685	1.1491e-06	0.000134544	1	0.849989	1.80249	1.85399e-05	0.000583625	0	-1.485	-2.79917	7.39338e-09	6.84182e-07	-1	11.7683	10.2833	11.3377	11.1333
1446982_at				1.11004	2.15852	1.16987e-06	0.000136162	1	0.873272	1.83181	2.52231e-05	0.000712859	0	-0.901655	-1.86821	1.71859e-05	0.000182405	0	8.06163	7.15998	8.27002	8.03325
1429361_at	Pmch	pro-melanin-concentrating hormone	110312	-1.54153	-2.91103	1.18025e-06	0.000136711	-1	-1.37482	-2.59335	5.39036e-06	0.000292782	-1	1.31538	2.48868	9.44136e-06	0.000115902	1	6.51096	7.82634	6.28481	6.45152
1444392_at				1.6671	3.17575	1.2444e-06	0.000143221	1	1.41616	2.66873	1.04793e-05	0.000413826	1	-1.53524	-2.89836	3.74141e-06	5.87693e-05	-1	9.14472	7.60948	9.27658	9.02564
1448299_at	Slc1a1	solute carrier family 1 (neuronal/epithelial high affinity glutamate transporter, system Xag), member 1	20510	-2.65144	-6.28295	1.29403e-06	0.000147834	-1	-1.34517	-2.5406	0.00213335	0.0130722	-1	2.05995	4.16973	3.18884e-05	0.000294354	1	8.0221	10.0821	7.43061	8.73689
1455691_at	Cyp21a1	cytochrome P450, family 21, subfamily a, polypeptide 1	13079	1.78876	3.45518	1.32247e-06	0.000150528	1	1.88386	3.69062	6.47159e-07	8.00308e-05	1	-1.47059	-2.77134	1.6556e-05	0.000177423	-1	7.42301	5.95242	7.74118	7.83628
1457644_s_at	Cxcl1	chemokine (C-X-C motif) ligand 1	14825	-3.94197	-15.3692	1.345e-06	0.000152532	-1	-2.70068	-6.50109	0.000133912	0.00205931	-1	6.76925	109.081	3.69757e-10	7.53136e-08	1	3.79812	10.5674	6.6254	7.86669
1449335_at	Timp3	tissue inhibitor of metalloproteinase 3	21859	1.27085	2.41304	1.36211e-06	0.000152987	1	1.19249	2.28547	3.19182e-06	0.000214824	1	-1.75894	-3.38449	1.17777e-08	9.64957e-07	-1	12.8688	11.1099	12.3807	12.3024
1428785_at	Amotl1	angiomotin-like 1	75723	0.668519	1.58944	1.36384e-06	0.000152987	0	1.02	2.02792	2.54526e-09	2.25146e-06	1	-1.3487	-2.54683	2.56882e-11	1.3369e-08	-1	12.0189	10.6702	11.3387	11.6902
1429759_at	Rps6ka6	ribosomal protein S6 kinase polypeptide 6	67071	1.22138	2.3317	1.37632e-06	0.000153688	1	0.939184	1.91744	3.78992e-05	0.000919561	0	-0.744973	-1.67594	0.000440141	0.00219645	0	10.6616	9.91662	11.138	10.8558
1453148_at	Sema3d	sema domain, immunoglobulin domain (Ig), short basic domain, secreted, (semaphorin) 3D	108151	2.74995	6.72696	1.38321e-06	0.000153688	1	2.40797	5.30726	7.89693e-06	0.000349867	1	-2.57268	-5.94912	3.36947e-06	5.41073e-05	-1	7.44668	4.874	7.62396	7.28197
1418919_at	Sgol1	shugoshin-like 1 (S. pombe)	72415	-1.77365	-3.41917	1.38498e-06	0.000153688	-1	-2.13395	-4.38917	1.00188e-07	2.81985e-05	-1	1.19526	2.28987	0.000162954	0.00101641	1	8.35801	9.55327	7.77963	7.41933
1457070_at				1.19486	2.28923	1.44387e-06	0.000159651	1	0.604081	1.52001	0.00233856	0.0139174	0	-0.398686	-1.31831	0.0314518	0.0656918	0	7.13276	6.73408	7.92894	7.33816
1421624_a_at	Enah	enabled homolog (Drosophila)	13800	-2.00641	-4.01781	1.45233e-06	0.000159733	-1	-1.27512	-2.42019	0.000306608	0.00346571	-1	1.64751	3.13293	1.82646e-05	0.000191157	1	8.49222	10.1397	8.13332	8.86461
1451957_at	Il1f10	interleukin 1 family, member 10	215274	4.50624	22.7255	1.45493e-06	0.000159733	1	4.57096	23.7682	1.19808e-06	0.000116982	1	-6.22406	-74.7531	1.31094e-08	1.04795e-06	-1	9.34357	3.11951	7.62575	7.69047
1453405_at	Pla2g4d	phospholipase A2, group IVD	78390	-4.98402	-31.6474	1.52385e-06	0.000166671	-1	-4.90386	-29.937	1.89643e-06	0.000152038	-1	6.59748	96.8364	2.65444e-08	1.69446e-06	1	2.01891	8.61639	3.63237	3.71253
1415905_at	Reg1	regenerating islet-derived 1	19692	-5.24175	-37.8376	1.53389e-06	0.000166671	-1	-5.24175	-37.8376	1.53389e-06	0.000132651	-1	5.24175	37.8376	1.53389e-06	3.05396e-05	1	2.01891	7.26066	2.01891	2.01891
1434711_at	BC030867	cDNA sequence BC030867	217216	-1.22246	-2.33344	1.53535e-06	0.000166671	-1	-1.20203	-2.30063	1.92717e-06	0.000153381	-1	1.0074	2.01028	1.83788e-05	0.000191908	1	5.99933	7.00672	5.78426	5.8047
1437409_s_at	Gpr126	G protein-coupled receptor 126	215798	1.01075	2.01495	1.56805e-06	0.000169153	1	0.554639	1.4688	0.00125244	0.00910222	0	-0.564918	-1.4793	0.00106868	0.00439161	0	10.8632	10.2982	11.309	10.8529
1418967_a_at	St7	suppression of tumorigenicity 7	64213	1.14031	2.20429	1.57754e-06	0.000169585	1	-0.37886	-1.30031	0.0330994	0.0932394	0	0.501639	1.41582	0.00676677	0.0190057	0	5.18802	5.68966	6.82997	5.3108
1453673_at	Atp13a4	ATPase type 13A4	224079	-2.2706	-4.82524	1.60393e-06	0.000171826	-1	-2.26104	-4.79336	1.698e-06	0.000140939	-1	2.49829	5.65017	4.27088e-07	1.20315e-05	1	2.30492	4.80322	2.53262	2.54218
1437249_at	Skap1	src family associated phosphoprotein 1	78473	-2.57504	-5.95887	1.62907e-06	0.000173319	-1	-1.97633	-3.93492	4.47002e-05	0.0010146	-1	4.60694	24.3684	2.37717e-10	5.53363e-08	1	3.08272	7.68965	5.11461	5.71332
1449181_at	Fech	ferrochelatase	14151	1.04301	2.06053	1.65882e-06	0.000175481	1	0.463984	1.37935	0.00643623	0.0284422	0	-0.774098	-1.71012	6.63263e-05	0.000516854	0	9.79868	9.02459	10.0676	9.48857
1434626_at	Rpusd3	RNA pseudouridylate synthase domain containing 3	101122	-1.08484	-2.12114	1.66676e-06	0.000175481	-1	-0.322161	-1.2502	0.0548075	0.133981	0	0.399872	1.31939	0.0200722	0.045778	0	5.63186	6.03173	4.94689	5.70957
1441102_at	Prlr	prolactin receptor	19116	1.42289	2.68122	1.67097e-06	0.000175481	1	1.18226	2.26931	1.79462e-05	0.000573983	1	-1.77648	-3.42589	7.10651e-08	3.37702e-06	-1	8.42443	6.64795	8.07084	7.8302
1415951_at	Fkbp10	FK506 binding protein 10	14230	-1.64753	-3.13296	1.67206e-06	0.000175481	-1	-1.17568	-2.25899	0.000102783	0.00173226	-1	1.24845	2.37586	5.28399e-05	0.000434224	1	8.0426	9.29105	7.64352	8.11537
1449906_at	Selp	selectin, platelet	20344	-2.95613	-7.76041	1.70872e-06	0.000178723	-1	-1.90005	-3.73225	0.000308777	0.00348103	-1	2.78944	6.91362	3.69334e-06	5.83068e-05	1	5.26783	8.05728	5.10114	6.15723
1417028_a_at	Trim2	tripartite motif-containing 2	80890	1.55436	2.93703	1.77331e-06	0.000184854	1	1.8247	3.54232	1.87642e-07	4.17943e-05	1	-2.71721	-6.57602	3.8574e-10	7.80555e-08	-1	10.1796	7.46236	9.01672	9.28706
1453244_at	5830416P10Rik	RIKEN cDNA 5830416P10 gene	381232	-1.7407	-3.34197	1.78615e-06	0.000185568	-1	-1.62893	-3.09284	4.29623e-06	0.000258274	-1	1.85279	3.61197	7.60545e-07	1.85991e-05	1	2.09822	3.951	2.21031	2.32207
1458644_at	Ccdc62	coiled-coil domain containing 62	208908	1.99039	3.97345	1.80184e-06	0.000186572	1	2.31504	4.97619	2.18279e-07	4.59722e-05	1	-1.98114	-3.94806	1.91824e-06	3.62791e-05	-1	7.19525	5.21411	7.2045	7.52915
1449341_a_at	Stom	stomatin	13830	-1.79029	-3.45884	1.82385e-06	0.000187328	-1	-1.71993	-3.2942	3.11003e-06	0.000210692	-1	1.97784	3.93903	4.61389e-07	1.28806e-05	1	5.16882	7.14666	5.35637	5.42674
1425787_a_at	Sytl3	synaptotagmin-like 3	83672	-1.24226	-2.3657	1.8273e-06	0.000187328	-1	-1.0535	-2.07556	1.51735e-05	0.00052139	-1	1.92008	3.78443	2.923e-09	3.60766e-07	1	2.13613	4.05621	2.81394	3.00271
1420338_at	Alox15	arachidonate 15-lipoxygenase	11687	-3.52631	-11.5219	1.87161e-06	0.000190609	-1	-1.49028	-2.80944	0.0095328	0.0378427	-1	2.21382	4.63903	0.000415002	0.00210148	1	4.69088	6.9047	3.37839	5.41442
1456297_at	Slc46a2	solute carrier family 46, member 2	30936	1.40673	2.65135	1.87941e-06	0.000190776	1	1.72384	3.30314	1.06646e-07	2.97455e-05	1	-1.00335	-2.00465	0.000113469	0.000777211	-1	9.23663	8.23328	9.64001	9.95712
1424842_a_at	Arhgap24	Rho GTPase activating protein 24	231532	1.1379	2.2006	1.88861e-06	0.000191083	1	1.40635	2.65066	9.45303e-08	2.73519e-05	1	-1.29002	-2.44531	3.31646e-07	1.00664e-05	-1	10.1595	8.86949	10.0074	10.2758
1427700_x_at	Krt6a	keratin 6A	16687	-2.63355	-6.2055	1.91305e-06	0.000192925	-1	-2.67417	-6.38271	1.55631e-06	0.000133104	-1	2.45811	5.49495	4.74593e-06	6.97361e-05	1	10.9957	13.4538	10.8203	10.7797
1426767_at	Wdr90	WD repeat domain 90	106618	-1.7291	-3.3152	1.9662e-06	0.000195416	-1	-0.566487	-1.48091	0.0380521	0.103154	0	0.0143717	1.01001	0.955392	0.971489	0	7.71058	7.72495	5.99586	7.15847
1425543_s_at	Plekha5	pleckstrin homology domain containing, family A member 5	109135	0.826979	1.77397	1.96633e-06	0.000195416	0	1.0415	2.05836	7.47608e-08	2.33798e-05	1	-0.525383	-1.43932	0.000383375	0.00197986	0	10.3801	9.85474	10.6817	10.8962
1417023_a_at	Fabp4	fatty acid binding protein 4, adipocyte	11770	0.657389	1.57723	1.97339e-06	0.000195416	0	0.859348	1.81422	4.29499e-08	1.60208e-05	0	-1.36233	-2.571	2.59089e-11	1.3369e-08	-1	14.2542	12.8919	13.5493	13.7512
1421210_at	Ciita	class II transactivator	12265	-1.97507	-3.93147	1.97562e-06	0.000195416	-1	-1.56459	-2.95793	3.661e-05	0.000903144	-1	2.38944	5.23953	1.36013e-07	5.31108e-06	1	4.67484	7.06428	5.08921	5.49969
1420901_a_at	Hk1	hexokinase 1	15275	-1.62818	-3.09123	1.9924e-06	0.000196448	-1	-0.671405	-1.59262	0.0114181	0.0431839	0	1.55473	2.93778	3.6714e-06	5.81636e-05	1	5.26267	6.8174	5.18922	6.14599
1449450_at	Ptges	prostaglandin E synthase	64292	-1.95218	-3.86958	2.01732e-06	0.000197966	-1	-1.47592	-2.78162	6.34512e-05	0.00126088	-1	2.15949	4.46755	5.03654e-07	1.36662e-05	1	8.71688	10.8764	8.92419	9.40044
1458371_at				1.40562	2.64932	2.02058e-06	0.000197966	1	1.56737	2.96363	4.50701e-07	6.81421e-05	1	-1.16961	-2.24951	2.09053e-05	0.000212485	-1	6.34604	5.17643	6.58205	6.7438
1420399_at	Gfi1b	growth factor independent 1B	14582	2.01611	4.04491	2.05202e-06	0.000199782	1	0.518284	1.43225	0.0971154	0.202444	0	-0.441536	-1.35805	0.15336	0.233305	0	3.28208	2.84055	4.85666	3.35883
1420388_at	Prss12	protease, serine, 12 neurotrypsin (motopsin)	19142	-1.72556	-3.30708	2.07223e-06	0.000201117	-1	-1.49141	-2.81163	1.34885e-05	0.000487855	-1	1.76196	3.39159	1.56458e-06	3.09715e-05	1	10.0142	11.7762	10.0506	10.2848
1453067_at	Apitd1	apoptosis-inducing, TAF9-like domain 1	69928	-1.49406	-2.81681	2.08976e-06	0.000202184	-1	-1.26594	-2.40484	1.73182e-05	0.000562722	-1	1.47617	2.78209	2.45412e-06	4.29506e-05	1	8.06584	9.54201	8.04794	8.27607
1451492_at	Sla2	Src-like-adaptor 2	77799	-1.57244	-2.97408	2.10886e-06	0.000203231	-1	-1.51098	-2.85004	3.57419e-06	0.000232647	-1	1.99322	3.98124	7.33693e-08	3.42095e-06	1	4.01833	6.01155	4.43911	4.50057
1423290_at	Hyou1	hypoxia up-regulated 1	12282	-1.54061	-2.90917	2.1137e-06	0.000203231	-1	-1.20635	-2.30754	4.43541e-05	0.00100971	-1	0.350292	1.27482	0.139916	0.217406	0	8.67942	9.02972	7.48911	7.82336
1441973_at	Zfp295	zinc finger protein 295	114565	1.01859	2.02594	2.14501e-06	0.000205602	1	0.250853	1.18991	0.112015	0.224566	0	-0.907207	-1.87541	9.59927e-06	0.000117282	0	8.52524	7.61803	8.63662	7.86888
1417018_at	Efemp2	epidermal growth factor-containing fibulin-like extracellular matrix protein 2	58859	-1.38046	-2.60351	2.15408e-06	0.000205834	-1	-1.23898	-2.36032	8.75316e-06	0.000370012	-1	0.980224	1.97277	0.000132675	0.000875635	0	10.8427	11.8229	10.4424	10.5839
1434428_at	D330028D13Rik	RIKEN cDNA D330028D13 gene	231946	1.54374	2.91549	2.16826e-06	0.000205861	1	1.21828	2.32669	4.14488e-05	0.00097334	1	-1.43507	-2.70396	5.63934e-06	7.95055e-05	-1	9.89817	8.46309	10.0068	9.68137
1419089_at	Timp3	tissue inhibitor of metalloproteinase 3	21859	1.29054	2.4462	2.16855e-06	0.000205861	1	1.15032	2.21963	9.60351e-06	0.000393073	1	-1.81784	-3.52554	1.53014e-08	1.15827e-06	-1	12.2029	10.3851	11.6756	11.5354
1417450_a_at	Tacc3	transforming, acidic coiled-coil containing protein 3	21335	-1.39348	-2.62712	2.18746e-06	0.000206475	-1	-1.14675	-2.21414	2.56024e-05	0.000720592	-1	1.04259	2.05992	7.6229e-05	0.000573245	1	10.9407	11.9833	10.5898	10.8366
1451594_s_at	Serpinb6c	serine (or cysteine) peptidase inhibitor, clade B, member 6c	97848	-2.52951	-5.77374	2.22518e-06	0.000207796	-1	-2.55265	-5.86709	1.96992e-06	0.000154794	-1	4.57428	23.823	2.92014e-10	6.36673e-08	1	5.89841	10.4727	7.94319	7.92005
1443983_at				1.28125	2.43049	2.23161e-06	0.000207796	1	1.7061	3.26278	3.73265e-08	1.48157e-05	1	-1.68648	-3.2187	4.44511e-08	2.39762e-06	-1	8.17826	6.49178	7.77303	8.19789
1422604_at	Uox	urate oxidase	22262	-8.20547	-295.184	2.25124e-06	0.000207796	-1	-7.40878	-169.928	8.46293e-06	0.000364412	-1	8.66878	406.969	1.07038e-06	2.36875e-05	1	3.41078	12.0796	3.87408	4.67077
1416430_at	Cat	catalase	12359	1.2654	2.40393	2.25212e-06	0.000207796	1	0.986411	1.98125	4.92944e-05	0.00106949	0	-1.39063	-2.62194	6.19842e-07	1.58467e-05	-1	11.3832	9.99254	11.2579	10.979
1452792_at	Dzip1	DAZ interacting protein 1	66573	1.02767	2.03872	2.25536e-06	0.000207796	1	1.05974	2.08456	1.49166e-06	0.000131069	1	-1.65907	-3.15814	1.87436e-09	2.59064e-07	-1	9.1771	7.51803	8.54569	8.57777
1416926_at	Trp53inp1	transformation related protein 53 inducible nuclear protein 1	60599	1.11439	2.16503	2.25734e-06	0.000207796	1	0.867253	1.82419	5.03334e-05	0.00108067	0	-0.932492	-1.90857	2.1586e-05	0.000217384	0	12.4602	11.5277	12.6421	12.395
1449191_at	Wfdc12	WAP four-disulfide core domain 12	192200	-3.97658	-15.7424	2.26992e-06	0.000207796	-1	-4.66136	-25.3051	2.5015e-07	4.91829e-05	-1	8.69922	415.649	1.23603e-11	7.97242e-09	1	3.43565	12.1349	8.15829	7.47351
1421921_at	Serpina3m	serine (or cysteine) peptidase inhibitor, clade A, member 3M	20717	-1.4439	-2.72055	2.27602e-06	0.000207796	-1	-1.07684	-2.10942	8.16125e-05	0.00148021	-1	1.71233	3.2769	2.12127e-07	7.24883e-06	1	3.76003	5.47236	4.02846	4.39551
1453503_at	Spink12	serine peptidase inhibitor, Kazal type 11	78242	-4.54712	-23.3787	2.282e-06	0.000207796	-1	-4.50926	-22.7732	2.55047e-06	0.000184492	-1	3.41149	10.6405	7.65801e-05	0.000575187	1	3.63934	7.05083	2.50371	2.54157
1446426_at				-2.45608	-5.48722	2.31442e-06	0.000208965	-1	-2.48374	-5.59344	1.99262e-06	0.000155787	-1	2.13942	4.40585	1.35672e-05	0.00015317	1	3.00101	5.14043	2.68436	2.65669
1443340_at	Micu1	mitochondrial calcium uptake 1	216001	2.33655	5.05093	2.31506e-06	0.000208965	1	1.83157	3.55925	4.73661e-05	0.00104597	1	-2.97629	-7.86959	7.57053e-08	3.514e-06	-1	6.77179	3.7955	6.13205	5.62707
1460248_at	Cpxm2	carboxypeptidase X 2 (M14 family)	55987	1.4707	2.77156	2.32191e-06	0.000208972	1	1.54109	2.91015	1.23569e-06	0.000118077	1	-2.18158	-4.5365	7.41707e-09	6.84182e-07	-1	10.6528	8.47119	9.94189	10.0123
1441981_at	Tmprss11f	transmembrane protease, serine 11f	243083	1.55867	2.94581	2.38671e-06	0.000213562	1	1.07933	2.11306	0.000187032	0.00256217	1	-1.11011	-2.15862	0.000139406	0.000905013	-1	9.30591	8.1958	9.75447	9.27514
1448780_at	Slc12a2	solute carrier family 12, member 2	20496	1.39782	2.63502	2.43566e-06	0.000214838	1	1.53645	2.9008	6.71151e-07	8.17088e-05	1	-1.09201	-2.13171	5.14147e-05	0.000426299	-1	8.93096	7.83895	9.23677	9.3754
1440578_at				1.10395	2.14943	2.47085e-06	0.000217257	1	1.04474	2.063	5.08455e-06	0.000281103	1	-1.37761	-2.59838	1.10332e-07	4.63485e-06	-1	8.68446	7.30685	8.4108	8.35159
1440607_at	Gm19929	predicted gene, 19929	100503855	1.12046	2.17416	2.47775e-06	0.000217257	1	0.798908	1.73978	0.000141917	0.00212875	0	-0.279931	-1.21414	0.110834	0.180934	0	7.87641	7.59648	8.71693	8.39538
1439293_at	BC031353	cDNA sequence BC031353	235493	1.40391	2.64618	2.48601e-06	0.000217257	1	1.80764	3.50068	6.98521e-08	2.27644e-05	1	-1.31621	-2.49012	5.76913e-06	8.082e-05	-1	9.39021	8.074	9.47791	9.88164
1436423_at	Themis	thymocyte selection associated	210757	-2.04711	-4.13277	2.49115e-06	0.000217257	-1	-1.98265	-3.95217	3.7968e-06	0.000239896	-1	2.76967	6.81953	3.32358e-08	1.97881e-06	1	2.47767	5.24734	3.20023	3.2647
1455359_at	Ptpn14	protein tyrosine phosphatase, non-receptor type 14	19250	1.31118	2.48145	2.62064e-06	0.00022397	1	1.61812	3.06975	1.38633e-07	3.45523e-05	1	-2.03661	-4.10281	4.14786e-09	4.63602e-07	-1	11.3132	9.27657	10.5878	10.8947
1435400_at	Efha2	EF-hand domain family, member A2	78506	1.0723	2.10279	2.6557e-06	0.00022588	1	0.635867	1.55387	0.000897271	0.0071949	0	-0.706708	-1.63208	0.000333863	0.00178245	0	8.9163	8.20959	9.28189	8.84545
1457352_x_at	Svopl	SV2 related protein homolog (rat)-like	320590	3.20373	9.21336	2.67339e-06	0.000226735	1	2.02771	4.07757	0.00049561	0.00477266	1	-3.47328	-11.1061	8.95769e-07	2.07894e-05	-1	7.33444	3.86115	7.06488	5.88886
1439323_a_at	Map4k1	mitogen-activated protein kinase kinase kinase kinase 1	26411	-1.18862	-2.27935	2.6874e-06	0.000226735	-1	-0.850681	-1.80335	0.000145537	0.00216315	0	1.38574	2.61306	3.245e-07	9.86889e-06	1	5.8704	7.25613	6.06751	6.40545
1451377_a_at	Aaas	achalasia, adrenocortical insufficiency, alacrimia	223921	-1.12304	-2.17806	2.68772e-06	0.000226735	-1	-0.928925	-1.90386	2.89406e-05	0.000781852	0	0.725037	1.65294	0.000411683	0.00208946	0	8.5275	9.25254	8.12949	8.32361
1435773_at	4930547N16Rik	RIKEN cDNA 4930547N16 gene	75317	-1.65527	-3.14982	2.71233e-06	0.00022819	-1	-1.72935	-3.31579	1.50865e-06	0.000131151	-1	1.61144	3.05556	3.85944e-06	6.01047e-05	1	7.11633	8.72777	7.0725	6.99841
1418655_at	B4galnt1	beta-1,4-N-acetyl-galactosaminyl transferase 1	14421	-1.10742	-2.1546	2.73755e-06	0.000229687	-1	-0.582657	-1.4976	0.00248728	0.0145542	0	1.62837	3.09163	1.03187e-08	8.75253e-07	1	8.26911	9.89748	8.79006	9.31482
1416120_at	Rrm2	ribonucleotide reductase M2	20135	-2.67519	-6.38725	2.78981e-06	0.00023306	-1	-2.36036	-5.13497	1.37772e-05	0.000493275	-1	1.63671	3.10956	0.000700122	0.0031533	1	7.30627	8.94298	6.26778	6.58262
1417267_s_at	Fkbp11	FK506 binding protein 11	66120	-1.86156	-3.63401	2.7928e-06	0.00023306	-1	-1.99945	-3.99849	1.06593e-06	0.000108915	-1	1.66321	3.16721	1.18165e-05	0.000137637	1	7.70265	9.36586	7.50429	7.3664
1455080_at	Ppp1r16b	protein phosphatase 1, regulatory (inhibitor) subunit 16B	228852	-1.6322	-3.09985	2.80223e-06	0.000233218	-1	-0.85158	-1.80448	0.00269238	0.0154163	0	1.61408	3.06116	3.24661e-06	5.27361e-05	1	7.03936	8.65344	7.02124	7.80186
1416781_at	Praf2	PRA1 domain family 2	54637	-1.26392	-2.40148	2.88247e-06	0.000237344	-1	-1.1083	-2.15591	1.53169e-05	0.00052457	-1	0.510481	1.42453	0.015192	0.0365544	0	9.82051	10.331	9.06706	9.22269
1419457_at	Rgnef	Rho-guanine nucleotide exchange factor	110596	2.20507	4.61098	2.90267e-06	0.000238373	1	2.4697	5.5393	6.21173e-07	7.91421e-05	1	-3.10753	-8.61905	2.12859e-08	1.4452e-06	-1	8.69819	5.59066	7.79574	8.06037
1449268_at	Gfpt1	glutamine fructose-6-phosphate transaminase 1	14583	-1.6217	-3.07738	2.92352e-06	0.000238818	-1	-1.73009	-3.31748	1.22611e-06	0.000117855	-1	2.07786	4.22181	9.01079e-08	3.97887e-06	1	2.56597	4.64383	3.02213	2.91374
1448745_s_at	Lor	loricrin	16939	1.81876	3.52778	2.93619e-06	0.000238934	1	2.3546	5.11452	7.7654e-08	2.4037e-05	1	-2.04244	-4.1194	6.05896e-07	1.56061e-05	-1	14.5779	12.5355	14.3543	14.8901
1460271_at	Trem3	triggering receptor expressed on myeloid cells 3	58218	-2.61429	-6.12323	2.94037e-06	0.000238934	-1	-2.61429	-6.12323	2.94037e-06	0.000202312	-1	2.61429	6.12323	2.94037e-06	4.91491e-05	1	2.01891	4.6332	2.01891	2.01891
1417522_at	Fbxo32	F-box protein 32	67731	1.71354	3.27965	2.98627e-06	0.000241617	1	2.60882	6.10004	6.6423e-09	4.28428e-06	1	-2.20382	-4.60698	8.72712e-08	3.9045e-06	-1	10.2435	8.03967	9.75321	10.6485
1449627_at	Osbpl6	oxysterol binding protein-like 6	99031	1.83211	3.56057	3.00267e-06	0.000241617	1	1.97181	3.9226	1.11775e-06	0.000111272	1	-2.64868	-6.27095	1.49536e-08	1.14879e-06	-1	7.05683	4.40814	6.24025	6.37995
1459860_x_at	Trim2	tripartite motif-containing 2	80890	1.8666	3.64673	3.01148e-06	0.000241617	1	1.80981	3.50597	4.50971e-06	0.000262445	1	-2.56111	-5.90163	3.33928e-08	1.98434e-06	-1	10.8729	8.31179	10.1784	10.1216
1426733_at	Itpk1	inositol 1,3,4-triphosphate 5/6 kinase	217837	-1.11753	-2.16975	3.019e-06	0.000241617	-1	-1.05934	-2.08398	6.04445e-06	0.00030926	-1	1.41859	2.67324	1.07194e-07	4.53377e-06	1	7.86793	9.28653	8.169	8.22718
1449555_a_at	Fetub	fetuin beta	59083	-5.36283	-41.1504	3.02926e-06	0.000241617	-1	-4.178	-18.1011	6.38698e-05	0.00126514	-1	8.31099	317.584	5.11145e-09	5.25749e-07	1	2.65485	10.9658	5.60301	6.78785
1427509_at	Baiap3	BAI1-associated protein 3	545192	-1.24892	-2.37663	3.03251e-06	0.000241617	-1	-1.15159	-2.22158	8.62037e-06	0.000367107	-1	1.28793	2.44178	2.01488e-06	3.76371e-05	1	2.43544	3.72337	2.47445	2.57178
1429294_at	Trip13	thyroid hormone receptor interactor 13	69716	-1.99756	-3.99323	3.03582e-06	0.000241617	-1	-1.94226	-3.84307	4.38215e-06	0.000260323	-1	1.4988	2.82607	9.6875e-05	0.000688407	1	7.54438	9.04317	7.04562	7.10091
1451263_a_at	Fabp4	fatty acid binding protein 4, adipocyte	11770	0.5901	1.50535	3.09004e-06	0.000244674	0	0.697822	1.62205	3.07948e-07	5.35621e-05	0	-1.12681	-2.18376	1.78993e-10	4.50538e-08	-1	14.7078	13.581	14.1711	14.2788
1460353_at	Tmem48	transmembrane protein 48	72787	-1.67419	-3.1914	3.10511e-06	0.00024524	-1	-1.79273	-3.4647	1.24055e-06	0.000118177	-1	1.21677	2.32425	0.000138874	0.000903266	1	7.58591	8.80268	7.12848	7.00994
1416429_a_at	Cat	catalase	12359	1.10163	2.14596	3.1133e-06	0.000245261	1	0.909174	1.87797	3.38463e-05	0.000858216	0	-1.00979	-2.01362	9.51801e-06	0.000116612	-1	12.2612	11.2515	12.3531	12.1606
1448747_at	Fbxo32	F-box protein 32	67731	1.67827	3.20045	3.12488e-06	0.000245549	1	2.26898	4.81982	4.35522e-08	1.60521e-05	1	-2.29369	-4.9031	3.69779e-08	2.10835e-06	-1	11.6393	9.34557	11.0238	11.6145
1424300_at	Gemin6	gem (nuclear organelle) associated protein 6	67242	-1.38029	-2.60321	3.14711e-06	0.000246127	-1	-1.52646	-2.88078	8.07286e-07	9.12699e-05	-1	1.09484	2.13589	5.39043e-05	0.000441152	1	8.54722	9.64205	8.26176	8.1156
1416875_at	Parvg	parvin, gamma	64099	-1.84045	-3.58122	3.15681e-06	0.000246127	-1	-1.53857	-2.90505	2.94822e-05	0.000790183	-1	2.22838	4.68608	2.24559e-07	7.5487e-06	1	2.02481	4.25319	2.41274	2.71463
1419610_at	Ccr1	chemokine (C-C motif) receptor 1	12768	-4.38064	-20.8307	3.16403e-06	0.000246127	-1	-4.92651	-30.4109	6.4276e-07	8.00308e-05	-1	3.47834	11.1451	5.35133e-05	0.000438996	1	4.25829	7.73663	3.35599	2.81012
1418601_at	Aldh1a7	aldehyde dehydrogenase family 1, subfamily A7	26358	2.17143	4.50469	3.20888e-06	0.000248367	1	1.60039	3.03225	0.000122902	0.00194282	1	-2.33473	-5.04456	1.2137e-06	2.57195e-05	-1	9.62274	7.28802	9.45944	8.88841
1423813_at	Kif22	kinesin family member 22	110033	-1.78411	-3.44406	3.22211e-06	0.00024877	-1	-1.38401	-2.60993	7.05866e-05	0.00135065	-1	0.909426	1.8783	0.00348358	0.0111775	0	9.09465	10.0041	8.21997	8.62007
1429486_at	Pfkfb2	6-phosphofructo-2-kinase/fructose-2,6-biphosphatase 2	18640	0.836124	1.78525	3.25698e-06	0.000249793	0	0.886431	1.8486	1.49296e-06	0.000131069	0	-1.17935	-2.26475	2.40092e-08	1.57264e-06	-1	10.0371	8.85771	9.69384	9.74414
1419088_at	Timp3	tissue inhibitor of metalloproteinase 3	21859	2.22371	4.67093	3.25957e-06	0.000249793	1	2.23403	4.70445	3.06698e-06	0.000208232	1	-3.3237	-10.0123	9.82941e-09	8.41694e-07	-1	9.07551	5.75181	7.97552	7.98584
1415976_a_at	Carhsp1	calcium regulated heat stable protein 1	52502	-1.26047	-2.39574	3.28989e-06	0.000250874	-1	-1.19672	-2.29218	6.43982e-06	0.000318629	-1	1.40063	2.64017	7.91703e-07	1.91643e-05	1	9.23633	10.637	9.37649	9.44025
1442116_at	Gpr176	G protein-coupled receptor 176	381413	-2.74805	-6.71807	3.2982e-06	0.00025089	-1	-1.50963	-2.84737	0.00197391	0.0123709	-1	3.58752	12.0213	7.82049e-08	3.59766e-06	1	5.66546	9.25297	6.50493	7.74334
1418668_at	Acsm1	acyl-CoA synthetase medium-chain family member 1	117147	2.44639	5.4505	3.31001e-06	0.000251171	1	2.57746	5.9689	1.65163e-06	0.000138826	1	0.140548	1.10232	0.710585	0.781629	0	3.77841	3.91896	6.36535	6.49642
1423405_at	Timp4	tissue inhibitor of metalloproteinase 4	110595	3.06884	8.39099	3.34799e-06	0.000253433	1	3.8472	14.3921	1.44555e-07	3.52397e-05	1	-3.42542	-10.7437	7.57786e-07	1.85658e-05	-1	7.4891	4.06369	7.13253	7.91089
1435246_at	Paqr8	progestin and adipoQ receptor family member VIII	74229	2.75122	6.73287	3.3733e-06	0.000253881	1	3.18137	9.07165	4.65588e-07	6.91405e-05	1	-3.76695	-13.6133	3.92828e-08	2.1874e-06	-1	8.77972	5.01277	7.76399	8.19413
1424538_at	Ubl4	ubiquitin-like 4	27643	-1.03768	-2.05293	3.39703e-06	0.000253881	-1	-0.800846	-1.74212	7.8131e-05	0.0014407	0	0.871636	1.82974	2.97595e-05	0.000279025	0	10.6122	11.4838	10.4462	10.683
1437756_at	Gimap9	GTPase, IMAP family member 9	317758	-1.08256	-2.11779	3.39836e-06	0.000253881	-1	-1.03035	-2.04253	6.43939e-06	0.000318629	-1	1.51777	2.86349	2.76543e-08	1.74374e-06	1	8.08966	9.60744	8.52488	8.57708
1417976_at	Ada	adenosine deaminase	11486	-1.9894	-3.97072	3.40312e-06	0.000253881	-1	-2.16438	-4.48272	1.09808e-06	0.000109666	-1	3.22095	9.324	2.94138e-09	3.61369e-07	1	7.00049	10.2214	8.23204	8.05707
1417205_at	Kdelr2	KDEL (Lys-Asp-Glu-Leu) endoplasmic reticulum protein retention receptor 2	66913	-1.13541	-2.19681	3.42473e-06	0.000254268	-1	-0.9738	-1.96401	2.34292e-05	0.000679183	0	1.18168	2.26841	2.0168e-06	3.76371e-05	1	8.98284	10.1645	9.02911	9.19072
1432202_a_at	Poc1a	POC1 centriolar protein homolog A (Chlamydomonas)	70235	-1.9652	-3.90468	3.4562e-06	0.000255379	-1	-1.80513	-3.49461	1.02421e-05	0.000408629	-1	1.69625	3.24058	2.18956e-05	0.000220093	1	5.21383	6.91008	4.94488	5.10495
1429226_at	2310014F06Rik	RIKEN cDNA 2310014F06 gene	69625	0.838128	1.78773	3.47381e-06	0.000256069	0	1.33161	2.51684	4.06771e-09	3.07161e-06	1	-1.57116	-2.97143	2.81186e-10	6.23292e-08	-1	6.24106	4.6699	5.50803	6.00151
1444034_at	Rapgef4	Rap guanine nucleotide exchange factor (GEF) 4	56508	3.05427	8.30665	3.61281e-06	0.000265461	1	3.29594	9.8215	1.30647e-06	0.000120025	1	-1.2324	-2.34958	0.0168285	0.0397232	-1	5.53803	4.30563	7.3599	7.60157
1422783_a_at	Krt6a	keratin 6A	16687	-2.98644	-7.92516	3.64498e-06	0.000266782	-1	-2.85553	-7.2377	6.50109e-06	0.000319855	-1	2.60266	6.07405	2.04831e-05	0.000209017	1	11.8984	14.5011	11.5146	11.6456
1430634_a_at	Pfkp	phosphofructokinase, platelet	56421	-1.78862	-3.45485	3.67201e-06	0.000268126	-1	-1.0777	-2.11067	0.000968767	0.00758359	-1	0.815712	1.76017	0.00811017	0.0220236	0	6.82848	7.64419	5.85557	6.56649
1436638_at	6720401G13Rik	RIKEN cDNA 6720401G13 gene	103012	1.29796	2.4588	3.69458e-06	0.000268871	1	1.39219	2.62476	1.45228e-06	0.000130326	1	-2.17248	-4.50798	1.91277e-09	2.62033e-07	-1	8.95377	6.78129	8.07925	8.17348
1453321_at	Fndc1	fibronectin type III domain containing 1	68655	1.25945	2.39405	3.72212e-06	0.000269836	1	1.19946	2.29654	6.97917e-06	0.000328082	1	-0.989677	-1.98574	6.91296e-05	0.000532799	0	11.147	10.1573	11.4168	11.3568
1453380_a_at	Xrcc6bp1	XRCC6 binding protein 1	68876	-1.43234	-2.69884	3.7303e-06	0.000269836	-1	-1.23825	-2.35912	2.30417e-05	0.00066988	-1	1.04135	2.05816	0.000160305	0.00100527	1	6.41474	7.4561	6.02376	6.21785
1429185_at	Arhgef26	Rho guanine nucleotide exchange factor (GEF) 26	622434	1.28691	2.44005	3.76285e-06	0.000271557	1	1.73747	3.3345	5.50236e-08	1.89281e-05	1	-1.90107	-3.73489	1.39764e-08	1.0927e-06	-1	7.63816	5.73709	7.024	7.47456
1446675_at	Adk	adenosine kinase	11534	1.47359	2.77711	3.79532e-06	0.000273263	1	0.916646	1.88772	0.000745005	0.00632274	0	-1.45894	-2.74905	4.32245e-06	6.53114e-05	-1	8.98707	7.52813	9.00172	8.44478
1430418_at	Tmem57	transmembrane protein 57	66146	1.42966	2.69384	3.912e-06	0.000279712	1	1.1108	2.15965	8.17202e-05	0.0014813	1	-1.82127	-3.53391	1.36045e-07	5.31108e-06	-1	7.09262	5.27135	6.70101	6.38215
1435184_at	Npr3	natriuretic peptide receptor 3	18162	1.86562	3.64424	3.97722e-06	0.00028372	1	1.73646	3.33217	9.93124e-06	0.000401398	1	-4.02667	-16.2985	3.19064e-11	1.56797e-08	-1	8.43548	4.40881	6.27443	6.14527
1431786_s_at	1190003J15Rik	RIKEN cDNA 1190003J15 gene	76974	-0.887914	-1.8505	4.02182e-06	0.000285586	0	-0.843033	-1.79382	7.8221e-06	0.000348449	0	1.19692	2.29249	6.07951e-08	3.02071e-06	1	12.9853	14.1822	13.2943	13.3391
1450468_at	Myoc	myocilin	17926	4.46456	22.0783	4.04361e-06	0.000286476	1	4.42844	21.5324	4.49352e-06	0.000262445	1	-4.28041	-19.4326	6.95035e-06	9.31139e-05	-1	10.6059	6.32544	10.79	10.7539
1453289_at	Eif2c4	eukaryotic translation initiation factor 2C, 4	76850	1.3633	2.57273	4.06464e-06	0.000287165	1	1.30981	2.47908	6.80226e-06	0.000323997	1	-0.984104	-1.97808	0.000184902	0.00111939	0	10.8892	9.90511	11.2684	11.2149
1455859_at	A330021E22Rik	RIKEN cDNA A330021E22 gene	207686	-2.60586	-6.08755	4.07188e-06	0.000287165	-1	-1.93007	-3.81074	0.000141512	0.00212673	-1	4.21641	18.5894	3.69438e-09	4.23622e-07	1	5.70921	9.92562	7.31975	7.99554
1420558_at	Selp	selectin, platelet	20344	-2.09498	-4.27219	4.08508e-06	0.00028728	-1	-1.64969	-3.13767	7.31083e-05	0.00138267	-1	2.02536	4.07093	6.31415e-06	8.6767e-05	1	8.49517	10.5205	8.42555	8.87083
1422230_s_at				-4.39757	-21.0766	4.09206e-06	0.00028728	-1	-4.39757	-21.0766	4.09206e-06	0.000249882	-1	3.97169	15.6891	1.48011e-05	0.000163261	1	2.44479	6.41648	2.01891	2.01891
1458345_s_at	Colec11	collectin sub-family member 11	71693	2.64767	6.26656	4.17792e-06	0.000291983	1	2.36487	5.15107	1.7274e-05	0.000562722	1	-1.09941	-2.14267	0.0152451	0.036648	-1	3.33104	2.23163	4.8793	4.5965
1440926_at	Flt1	FMS-like tyrosine kinase 1	14254	-1.65775	-3.15524	4.20776e-06	0.000293406	-1	-0.203747	-1.15169	0.438713	0.59756	0	0.798269	1.73901	0.00605421	0.0173747	0	6.64644	7.44471	5.78696	7.24096
1437517_x_at	Serpinb3a	serine (or cysteine) peptidase inhibitor, clade B (ovalbumin), member 3A	20248	-2.66539	-6.344	4.24748e-06	0.00029551	-1	-2.38891	-5.2376	1.68251e-05	0.000557118	-1	9.06283	534.79	1.31454e-14	8.1397e-11	1	3.80998	12.8728	10.2074	10.4839
1460077_at	Ttc3	tetratricopeptide repeat domain 3	22129	1.01049	2.01459	4.28986e-06	0.000297789	1	0.809189	1.75223	6.32255e-05	0.0012572	0	-0.877215	-1.83683	2.49114e-05	0.000243139	0	8.1083	7.23109	8.24158	8.04028
1428774_at	Gpc6	glypican 6	23888	1.13472	2.19575	4.49026e-06	0.00030893	1	1.10088	2.14486	6.62371e-06	0.000319855	1	-1.52578	-2.87942	7.16302e-08	3.38576e-06	-1	10.4418	8.91599	10.0507	10.0169
1452405_x_at	Trav9d-3	T cell receptor alpha variable 9D-3	100038850	-1.32937	-2.51292	4.51887e-06	0.000310209	-1	-1.04665	-2.06572	7.98064e-05	0.00145598	-1	3.62977	12.3785	6.72494e-13	1.22473e-09	1	5.81177	9.44154	8.11218	8.39489
1454858_x_at	Mettl7a1	methyltransferase like 7A1	70152	1.33147	2.5166	4.5555e-06	0.000312032	1	1.16531	2.24281	2.38961e-05	0.000685657	1	-1.53825	-2.90441	6.51856e-07	1.64747e-05	-1	11.1715	9.63324	10.9647	10.7986
1458324_x_at				2.51664	5.72248	4.56972e-06	0.000312315	1	2.90483	7.48929	6.62372e-07	8.13771e-05	1	-2.45052	-5.46615	6.43312e-06	8.79724e-05	-1	5.63372	3.18319	5.69983	6.08802
1425415_a_at	Slc1a1	solute carrier family 1 (neuronal/epithelial high affinity glutamate transporter, system Xag), member 1	20510	-2.95134	-7.73468	4.5934e-06	0.000312553	-1	-1.74411	-3.34988	0.00133012	0.00947198	-1	2.68314	6.42253	1.52257e-05	0.000166922	1	6.00214	8.68528	5.73394	6.94117
1433207_at	5033430J17Rik	RIKEN cDNA 5033430J17 gene	76004	1.80923	3.50455	4.64419e-06	0.00031431	1	2.21485	4.64233	2.93317e-07	5.3172e-05	1	-4.04314	-16.4856	2.16982e-11	1.22356e-08	-1	6.70184	2.65871	4.46794	4.87356
1448104_at	Aldh6a1	aldehyde dehydrogenase family 6, subfamily A1	104776	1.12683	2.18379	4.64939e-06	0.00031431	1	1.05264	2.07432	1.10254e-05	0.000426684	1	-1.49233	-2.81342	9.34171e-08	4.08429e-06	-1	11.8246	10.3323	11.4591	11.3849
1427075_s_at	Pcmtd2	protein-L-isoaspartate (D-aspartate) O-methyltransferase domain containing 2	245867	1.11416	2.16469	4.65564e-06	0.00031431	1	0.715709	1.64229	0.000641038	0.00569975	0	-0.990779	-1.98726	2.01491e-05	0.000206288	0	10.9453	9.95452	11.0687	10.6702
1425268_a_at	Pear1	platelet endothelial aggregation receptor 1	73182	-1.12656	-2.18338	4.66998e-06	0.00031431	-1	-0.1068	-1.07684	0.552137	0.701447	0	0.440301	1.35689	0.0222323	0.0497229	0	6.07089	6.51119	5.38463	6.40439
1426782_at	Gpr125	G protein-coupled receptor 125	70693	1.44092	2.71493	4.71381e-06	0.000315204	1	1.64724	3.13235	7.83052e-07	9.046e-05	1	-2.65869	-6.31458	5.35413e-10	9.98578e-08	-1	12.4697	9.81104	11.252	11.4583
1429344_at	9130022000000000	uncharacterized 9130022E09	74564	1.80912	3.50428	4.73952e-06	0.000316241	1	1.30004	2.46236	0.000218706	0.00281396	1	-1.42829	-2.69128	8.06316e-05	0.00059673	-1	9.1724	7.74411	9.55322	9.04415
1429301_at				0.94643	1.9271	4.85165e-06	0.000321642	0	1.0279	2.03906	1.62903e-06	0.0001378	1	-0.734987	-1.66438	9.84878e-05	0.000696553	0	9.98936	9.25437	10.2008	10.2823
1425090_s_at	Kcnc4	potassium voltage gated channel, Shaw-related subfamily, member 4	99738	-0.914319	-1.88468	4.88736e-06	0.000321833	0	0.116726	1.08427	0.426759	0.586445	0	1.33758	2.52727	2.2129e-08	1.49915e-06	1	6.92945	8.26703	7.35271	8.38376
1436237_at	Ttc9	tetratricopeptide repeat domain 9	69480	1.35555	2.55895	4.89155e-06	0.000321833	1	1.60394	3.03972	5.03612e-07	7.11956e-05	1	-2.23605	-4.71104	3.40573e-09	4.07731e-07	-1	9.0732	6.83715	8.19271	8.44109
1455918_at	Adrb3	adrenergic receptor, beta 3	11556	2.58944	6.01863	4.99935e-06	0.00032723	1	2.3163	4.98054	2.00571e-05	0.000612998	1	-4.1755	-18.0697	5.00917e-09	5.20415e-07	-1	8.34931	4.1738	6.76324	6.49011
1433626_at	Plscr4	phospholipid scramblase 4	235527	1.5892	3.00882	5.01184e-06	0.000327356	1	1.31762	2.49254	4.89079e-05	0.00106558	1	-1.33316	-2.51953	4.27686e-05	0.000368629	-1	9.4009	8.06775	9.65694	9.38536
1426916_at	Scrn3	secernin 3	74616	1.0482	2.06796	5.10852e-06	0.000332968	1	0.803901	1.74582	0.000117687	0.00189556	0	-1.3691	-2.58309	1.27569e-07	5.10937e-06	-1	8.08309	6.71399	7.7622	7.51789
1452253_at	Crim1	cysteine rich transmembrane BMP regulator 1 (chordin like)	50766	0.915474	1.88619	5.13802e-06	0.000334187	0	0.830525	1.77833	1.7361e-05	0.000563299	0	-1.28273	-2.43298	4.51929e-08	2.42769e-06	-1	8.97138	7.68866	8.60413	8.51918
1451057_x_at	Dnm2	dynamin 2	13430	-1.04877	-2.06876	5.21247e-06	0.000337198	-1	-0.716761	-1.64349	0.000387634	0.00403536	0	1.35544	2.55874	1.52357e-07	5.75945e-06	1	6.42589	7.78133	6.73256	7.06457
1451128_s_at	Kif22	kinesin family member 22	110033	-1.73516	-3.32917	5.21699e-06	0.000337198	-1	-1.40713	-2.6521	6.5038e-05	0.00128009	-1	0.834452	1.78318	0.00683461	0.0191562	0	9.49653	10.331	8.59582	8.92385
1434436_at	Morc4	microrchidia 4	75746	-1.02278	-2.03183	5.23661e-06	0.000337433	-1	-0.81058	-1.75392	8.41661e-05	0.00150972	0	0.0132427	1.00922	0.93554	0.958164	0	9.76914	9.78238	8.7596	8.9718
1440175_at	Epn2	epsin 2	13855	1.48936	2.80765	5.44833e-06	0.000347794	1	0.402861	1.32213	0.104559	0.213745	0	-1.11028	-2.15887	0.000167475	0.00103866	-1	6.15862	5.04834	6.5377	5.4512
1418353_at	Cd5	CD5 antigen	12507	-1.34738	-2.5445	5.46717e-06	0.000348279	-1	-0.784796	-1.72285	0.00168152	0.0110695	0	2.54845	5.85004	4.31083e-10	8.50085e-08	1	5.45697	8.00542	6.65804	7.22062
1426917_s_at	Scrn3	secernin 3	74616	0.892628	1.85656	5.47923e-06	0.000348331	0	0.666592	1.58732	0.000165212	0.00237906	0	-1.22298	-2.33428	6.81712e-08	3.2773e-06	-1	8.92747	7.70449	8.59712	8.37108
1425424_at				1.12988	2.18841	5.50716e-06	0.000348874	1	1.26725	2.40703	1.20287e-06	0.000116982	1	-0.941774	-1.92089	5.00498e-05	0.000417316	0	7.77884	6.83706	7.96695	8.10431
1445781_at				1.11826	2.17086	5.5842e-06	0.000351624	1	0.912451	1.88224	6.44196e-05	0.00127277	0	-0.715876	-1.64248	0.000752692	0.00334338	0	11.2464	10.5305	11.6488	11.443
1453497_a_at	Piga	phosphatidylinositol glycan anchor biosynthesis, class A	18700	-1.40806	-2.65381	5.58783e-06	0.000351624	-1	-1.61169	-3.05609	9.24088e-07	9.89957e-05	-1	1.84489	3.59227	1.34966e-07	5.28931e-06	1	3.63434	5.47924	4.07117	3.86755
1434454_at	Adcy9	adenylate cyclase 9	11515	1.09812	2.14075	5.6346e-06	0.000353848	1	1.19658	2.29196	1.82274e-06	0.000148505	1	-1.64445	-3.12629	1.83196e-08	1.32208e-06	-1	10.1534	8.50892	9.60704	9.7055
1449393_at	Sh2d1a	SH2 domain protein 1A	20400	-2.23842	-4.71881	5.66584e-06	0.00035509	-1	-2.17021	-4.5009	8.39429e-06	0.000364412	-1	5.54839	46.7986	4.83322e-12	4.31265e-09	1	3.64432	9.19272	6.95429	7.0225
1445855_at	Ggct	gamma-glutamyl cyclotransferase	110175	1.41724	2.67075	5.73331e-06	0.00035787	1	1.31119	2.48146	1.51733e-05	0.00052139	1	-0.468946	-1.3841	0.0517335	0.0980454	0	10.6431	10.1742	11.5914	11.4854
1418445_at	Slc16a2	solute carrier family 16 (monocarboxylic acid transporters), member 2	20502	-1.10946	-2.15764	5.74736e-06	0.000358025	-1	-0.576077	-1.49079	0.00422136	0.0211034	0	0.563603	1.47796	0.00493765	0.0147529	0	10.6826	11.2462	10.1368	10.6702
1445326_at	Sdk1	sidekick homolog 1 (chicken)	330222	-1.19229	-2.28515	5.82254e-06	0.000360387	-1	-1.16594	-2.24379	7.73671e-06	0.000347143	-1	0.877623	1.83735	0.000201445	0.0011957	0	4.61845	5.49607	4.30379	4.33014
1434411_at	Col12a1	collagen, type XII, alpha 1	12816	-2.64615	-6.25993	5.83184e-06	0.000360387	-1	-2.02063	-4.05762	0.000137552	0.00209165	-1	1.03457	2.04851	0.024259	0.0533384	0	8.74506	9.77964	7.13349	7.759
1418166_at	Il12rb1	interleukin 12 receptor, beta 1	16161	-1.65416	-3.1474	5.89336e-06	0.00036274	-1	-1.77364	-3.41916	2.37053e-06	0.000174742	-1	2.68904	6.44884	5.39507e-09	5.45854e-07	1	4.05998	6.74902	5.09486	4.97537
1419057_at	Slc5a1	solute carrier family 5 (sodium/glucose cotransporter), member 1	20537	-1.76055	-3.38826	5.93772e-06	0.000364119	-1	-1.55621	-2.94079	2.71151e-05	0.000747079	-1	4.87417	29.3272	7.64089e-13	1.31423e-09	1	6.92449	11.7987	10.0381	10.2425
1426258_at	Sorl1	sortilin-related receptor, LDLR class A repeats-containing	20660	-1.72979	-3.3168	5.94471e-06	0.000364119	-1	-1.33361	-2.52032	0.00012624	0.00197711	-1	0.888369	1.85108	0.00465596	0.0140798	0	7.26533	8.1537	6.42391	6.8201
1417427_at	Rnaseh2c	ribonuclease H2, subunit C	68209	-1.72886	-3.31466	6.04073e-06	0.000366708	-1	-1.49339	-2.8155	3.60803e-05	0.000895069	-1	1.94726	3.85641	1.25304e-06	2.62478e-05	1	5.97372	7.92098	6.19212	6.42759
1440264_at				1.24794	2.37503	6.13364e-06	0.000371087	1	1.04495	2.0633	5.22788e-05	0.00111226	1	-0.797069	-1.73757	0.000820932	0.00357369	0	7.98739	7.19032	8.43826	8.23527
1436271_at				-1.3339	-2.52084	6.13684e-06	0.000371087	-1	-1.10508	-2.1511	5.90017e-05	0.00120098	-1	1.77657	3.4261	1.18184e-07	4.87163e-06	1	6.2199	7.99647	6.66257	6.8914
1422177_at	Il13ra2	interleukin 13 receptor, alpha 2	16165	-1.67511	-3.19343	6.16773e-06	0.000372228	-1	-1.14512	-2.21164	0.000438796	0.00439087	-1	2.7321	6.6442	5.41696e-09	5.46284e-07	1	8.63788	11.37	9.69487	10.2249
1431087_at	Spc24	SPC24, NDC80 kinetochore complex component, homolog (S. cerevisiae)	67629	-1.54226	-2.9125	6.18661e-06	0.000372641	-1	-1.61199	-3.05673	3.49158e-06	0.000229998	-1	1.26064	2.39602	6.90594e-05	0.000532391	1	8.42536	9.686	8.14375	8.07401
1454883_at	Gsdmc2	gasdermin C2	331063	-2.69137	-6.45926	6.23953e-06	0.000374372	-1	-1.81857	-3.52732	0.000494416	0.00476857	-1	8.48438	358.141	8.46131e-14	3.74232e-10	1	2.17998	10.6644	7.973	8.84579
1424801_at	Enah	enabled homolog (Drosophila)	13800	-1.2893	-2.4441	6.32154e-06	0.000378559	-1	-0.962493	-1.94867	0.000186187	0.00255398	0	0.678144	1.60008	0.00405761	0.0126078	0	9.91419	10.5923	9.30303	9.62984
1429987_at	9930013L23Rik	RIKEN cDNA 9930013L23 gene	80982	-2.81402	-7.0324	6.34388e-06	0.000379073	-1	-2.60824	-6.09761	1.63389e-05	0.000545441	-1	2.65215	6.28603	1.33227e-05	0.000151088	1	2.74705	5.3992	2.58518	2.79096
1449517_at	Qpctl	glutaminyl-peptide cyclotransferase-like	67369	-1.48214	-2.79363	6.35461e-06	0.000379073	-1	-1.40752	-2.6528	1.21546e-05	0.000458912	-1	1.14529	2.2119	0.000130251	0.000863561	1	3.95631	5.10159	3.61945	3.69408
1427308_at	Dab1	disabled homolog 1 (Drosophila)	13131	3.23097	9.38896	6.37602e-06	0.000379618	1	3.32469	10.0192	4.41413e-06	0.000261303	1	-3.09448	-8.54147	1.09756e-05	0.000129795	-1	6.67003	3.57554	6.80651	6.90024
1426028_a_at	Cit	citron	12704	-1.4978	-2.82411	6.43308e-06	0.000381778	-1	-1.09722	-2.13942	0.000229136	0.00289435	-1	0.523379	1.43732	0.0427126	0.0838649	0	6.09002	6.6134	5.11561	5.51619
1452385_at	Usp53	ubiquitin specific peptidase 53	99526	0.954079	1.93734	6.43695e-06	0.000381778	0	0.72643	1.65454	0.000153872	0.00225242	0	-1.10306	-2.1481	9.3729e-07	2.14793e-05	-1	6.72877	5.62571	6.57979	6.35214
1439714_at				1.70575	3.26198	6.46499e-06	0.000382339	1	1.89347	3.71529	1.64112e-06	0.000138444	1	-0.373445	-1.29544	0.189127	0.275509	0	7.77693	7.40348	9.10923	9.29696
1419238_at	Abca7	ATP-binding cassette, sub-family A (ABC1), member 7	27403	-1.03964	-2.05571	6.47111e-06	0.000382339	-1	-0.273874	-1.20905	0.11785	0.233214	0	1.00272	2.00378	1.02058e-05	0.000122803	1	7.03181	8.03453	6.99489	7.76066
1423062_at	Igfbp3	insulin-like growth factor binding protein 3	16009	1.62578	3.08609	6.74787e-06	0.000395128	1	1.58377	2.99752	9.3885e-06	0.000388368	1	-1.50264	-2.8336	1.79331e-05	0.00018827	-1	12.6473	11.1446	12.7704	12.7284
1453355_at	Wnk2	WNK lysine deficient protein kinase 2	75607	1.35467	2.55738	6.75137e-06	0.000395128	1	1.90763	3.75191	5.77576e-08	1.96503e-05	1	-2.22973	-4.69045	5.24598e-09	5.36525e-07	-1	9.87826	7.64853	9.0032	9.55616
1441254_at	Pard3b	par-3 partitioning defective 3 homolog B (C. elegans)	72823	1.34273	2.53631	6.78009e-06	0.000395374	1	1.39511	2.63008	4.14512e-06	0.000252127	1	-2.68595	-6.43505	2.26474e-10	5.31184e-08	-1	5.4652	2.77924	4.12198	4.17435
1448627_s_at	Pbk	PDZ binding kinase	52033	-1.6886	-3.22343	6.78287e-06	0.000395374	-1	-1.80469	-3.49355	2.86437e-06	0.000199732	-1	0.578673	1.49348	0.0472496	0.091041	0	9.84207	10.4207	8.73214	8.61604
1428481_s_at	Cdca8	cell division cycle associated 8	52276	-1.59942	-3.03021	6.84773e-06	0.000397015	-1	-1.48434	-2.79788	1.7306e-05	0.000562722	-1	0.938335	1.91631	0.00183168	0.00672861	0	8.85268	9.79102	8.1916	8.30668
1449898_at	2013-09-01	septin 1	54204	-1.42006	-2.67597	7.03275e-06	0.000404469	-1	-0.933119	-1.9094	0.000699651	0.00606587	0	2.64127	6.23882	7.8137e-10	1.32192e-07	1	5.34966	7.99093	6.57087	7.05782
1454713_s_at	Hdc	histidine decarboxylase	15186	-2.55342	-5.87025	7.04811e-06	0.000404469	-1	-2.84992	-7.20961	1.67118e-06	0.000139649	-1	5.28022	38.8603	1.37495e-10	3.7016e-08	1	5.99341	11.2736	8.72022	8.42372
1435371_x_at	Ces1d	carboxylesterase 1D	104158	0.994791	1.99279	7.06765e-06	0.000404469	0	1.16264	2.23867	8.93459e-07	9.67185e-05	1	-1.86314	-3.63798	7.0267e-10	1.22217e-07	-1	8.83865	6.97551	7.9703	8.13815
1433557_at	Cbx7	chromobox homolog 7	52609	1.85208	3.61021	7.08749e-06	0.000404469	1	2.79305	6.93093	2.1678e-08	9.86985e-06	1	-2.20687	-4.61671	6.85182e-07	1.71628e-05	-1	7.92136	5.71449	7.56658	8.50754
1448147_at	Tnfrsf19	tumor necrosis factor receptor superfamily, member 19	29820	0.880877	1.84149	7.09324e-06	0.000404469	0	0.862194	1.8178	9.29358e-06	0.000385696	0	-1.06076	-2.08604	5.91651e-07	1.53413e-05	-1	12.3484	11.2876	12.1685	12.1498
1455983_at	Cdca2	cell division cycle associated 2	108912	-2.1162	-4.3355	7.1141e-06	0.000404876	-1	-1.96191	-3.89576	1.81732e-05	0.00057707	-1	1.29671	2.45668	0.00130671	0.0051595	1	7.59161	8.88832	6.77212	6.92641
1425855_a_at	Crk	v-crk sarcoma virus CT10 oncogene homolog (avian)	12928	-0.913819	-1.88403	7.16763e-06	0.000406428	0	-1.06391	-2.09059	9.56704e-07	0.000101895	-1	1.73803	3.3358	5.56851e-10	1.02012e-07	1	5.79569	7.53372	6.6199	6.46981
1439029_at	Gpt2	glutamic pyruvate transaminase (alanine aminotransferase) 2	108682	-1.83071	-3.55711	7.21084e-06	0.000406889	-1	-1.05709	-2.08073	0.00215237	0.0131564	-1	0.688963	1.61212	0.0317695	0.0661721	0	6.13698	6.82595	4.99524	5.76886
1418522_at	Mtx1	metaxin 1	17827	-1.02482	-2.03471	7.32857e-06	0.000411997	-1	-0.724688	-1.65254	0.00036069	0.00384008	0	1.13053	2.1894	2.03819e-06	3.78723e-05	1	8.48013	9.61067	8.58584	8.88598
1427105_at	Cenpn	centromere protein N	72155	-2.22574	-4.67752	7.38763e-06	0.00041435	-1	-2.14494	-4.42273	1.17369e-05	0.000446957	-1	1.30996	2.47935	0.00187382	0.00684282	1	5.24547	6.55543	4.32969	4.41049
1454779_s_at	C230052I12Rik	RIKEN cDNA C230052I12 gene	101831	-1.0101	-2.01405	7.49443e-06	0.000418822	-1	-0.684969	-1.60767	0.000547618	0.00510516	0	0.468623	1.38379	0.0103388	0.0267254	0	8.97886	9.44748	8.43738	8.76251
1430353_at	Glis3	GLIS family zinc finger 3	226075	-1.73623	-3.33162	7.58768e-06	0.000423052	-1	-1.6707	-3.18369	1.2271e-05	0.000460465	-1	1.3118	2.48251	0.000190778	0.00114867	1	7.57859	8.89038	7.15416	7.21968
1431105_a_at	Tmem33	transmembrane protein 33	67878	-1.31662	-2.49082	7.59744e-06	0.000423052	-1	-1.22135	-2.33166	1.92089e-05	0.000595303	-1	0.981284	1.97422	0.000219654	0.00127901	0	7.47745	8.45874	7.14212	7.23738
1434094_at	Tmem125	transmembrane protein 125	230678	-1.53151	-2.89089	7.64125e-06	0.000423852	-1	-0.981611	-1.97467	0.000928473	0.00736498	0	1.76502	3.39879	1.179e-06	2.52783e-05	1	9.05267	10.8177	9.28618	9.83609
1425902_a_at	Nfkb2	nuclear factor of kappa light polypeptide gene enhancer in B cells 2, p49/p100	18034	-1.01393	-2.0194	7.64613e-06	0.000423852	-1	-0.583239	-1.49821	0.00230189	0.0137738	0	1.31753	2.49238	2.17888e-07	7.41298e-06	1	8.51026	9.82779	8.81386	9.24455
1416299_at	Shcbp1	Shc SH2-domain binding protein 1	20419	-1.48666	-2.8024	7.65289e-06	0.000423852	-1	-1.79904	-3.47987	6.00901e-07	7.83101e-05	-1	1.16386	2.24057	0.000132476	0.000874583	1	9.7265	10.8904	9.40371	9.09133
1444555_at				1.24109	2.36377	7.69317e-06	0.000425323	1	1.06813	2.09671	4.68576e-05	0.00103696	1	-1.01633	-2.02276	8.18211e-05	0.000602135	-1	7.97627	6.95994	8.20103	8.02807
1416818_at	Parva	parvin, alpha	57342	-2.27261	-4.83195	7.71132e-06	0.000425524	-1	-1.63508	-3.10605	0.000316633	0.0035256	-1	0.663857	1.58431	0.0892144	0.151787	0	7.07327	7.73713	5.46452	6.10205
1420412_at	Tnfsf10	tumor necrosis factor (ligand) superfamily, member 10	22035	-2.4431	-5.43809	7.72431e-06	0.000425524	-1	-2.99082	-7.94925	5.16152e-07	7.2308e-05	-1	3.11894	8.68748	2.84399e-07	8.97554e-06	1	2.87736	5.99629	3.5532	3.00547
1426158_at	Tcrb-J	T cell receptor beta, joining region	21580	-2.24247	-4.73207	7.79673e-06	0.000428198	-1	-2.08098	-4.23094	1.96021e-05	0.000603261	-1	2.60998	6.10495	1.05277e-06	2.3415e-05	1	2.61767	5.22765	2.98518	3.14667
1439163_at	Zbtb16	zinc finger and BTB domain containing 16	235320	2.67928	6.40535	7.8005e-06	0.000428198	1	2.93761	7.66143	2.36247e-06	0.000174563	1	-2.27556	-4.84185	5.51492e-05	0.000448731	-1	8.27132	5.99576	8.67504	8.93337
1449334_at	Timp3	tissue inhibitor of metalloproteinase 3	21859	1.31718	2.49179	7.8191e-06	0.000428459	1	1.23121	2.34764	1.80112e-05	0.000575465	1	-2.00961	-4.02673	2.04328e-08	1.41036e-06	-1	12.03	10.0203	11.3375	11.2516
1445421_at				1.15824	2.23185	7.87812e-06	0.000430685	1	1.37204	2.58837	8.34919e-07	9.29823e-05	1	-1.3136	-2.48561	1.5158e-06	3.02378e-05	-1	7.42336	6.10976	7.268	7.4818
1424938_at	Steap1	six transmembrane epithelial antigen of the prostate 1	70358	-5.43511	-43.2645	7.9003e-06	0.000430685	-1	-4.66799	-25.4217	4.91429e-05	0.00106695	-1	4.27672	19.3829	0.000128902	0.000857339	1	4.59395	8.87067	3.43556	4.20268
1417177_at	Galk1	galactokinase 1	14635	-1.20887	-2.31156	7.90811e-06	0.000430685	-1	-0.874448	-1.83331	0.000306189	0.00346396	0	0.951477	1.93385	0.000128637	0.000856106	0	8.25982	9.2113	8.00243	8.33685
1424849_at	Wdr62	WD repeat domain 62	233064	-2.42083	-5.35478	7.91537e-06	0.000430685	-1	-1.64909	-3.13635	0.000546499	0.00509934	-1	3.01063	8.05916	4.24618e-07	1.1994e-05	1	4.30423	7.31486	4.89403	5.66577
1416076_at	Ccnb1	cyclin B1	268697	-2.41705	-5.3408	7.94054e-06	0.000430839	-1	-2.38211	-5.21297	9.53461e-06	0.000392303	-1	2.06025	4.17058	5.38003e-05	0.00044065	1	8.88321	10.9435	8.52641	8.56135
1425271_at	Psmc3ip	proteasome (prosome, macropain) 26S subunit, ATPase 3, interacting protein	19183	-1.52988	-2.88762	8.04949e-06	0.000434168	-1	-1.41441	-2.6655	2.11352e-05	0.000633067	-1	0.819402	1.76467	0.00408515	0.0126769	0	8.54082	9.36022	7.83034	7.94581
1426914_at	Marveld2	MARVEL (membrane-associating) domain containing 2	218518	1.00988	2.01375	8.13222e-06	0.000437867	1	1.1629	2.23906	1.27556e-06	0.00011895	1	-1.49461	-2.81788	3.40705e-08	2.00156e-06	-1	9.86454	8.36993	9.37981	9.53282
1423827_s_at	Noc4l	nucleolar complex associated 4 homolog (S. cerevisiae)	100608	-1.38302	-2.60814	8.17208e-06	0.000439249	-1	-0.978866	-1.97092	0.000388799	0.00404613	0	1.15879	2.2327	6.6945e-05	0.000520703	1	8.5232	9.68199	8.29897	8.70312
1451910_a_at	Cd6	CD6 antigen	12511	-2.53562	-5.79825	8.29241e-06	0.00044283	-1	-2.08772	-4.25076	8.22879e-05	0.00148984	-1	2.53992	5.81558	8.11701e-06	0.000104521	1	2.01904	4.55896	2.02335	2.47124
1426044_a_at	Prkcq	protein kinase C, theta	18761	-1.25803	-2.39169	8.29965e-06	0.00044283	-1	-0.72028	-1.6475	0.0025135	0.0146522	0	1.53547	2.89882	5.83136e-07	1.51459e-05	1	9.70617	11.2416	9.98361	10.5214
1457883_at	Pm20d2	peptidase M20 domain containing 2	242377	1.27543	2.42071	8.34207e-06	0.00044283	1	1.31308	2.48472	5.76529e-06	0.000305335	1	-1.45012	-2.7323	1.55844e-06	3.08697e-05	-1	7.90793	6.45781	7.73324	7.77089
1420650_at	Zfhx3	zinc finger homeobox 3	11906	1.7624	3.39262	8.36742e-06	0.00044283	1	1.30956	2.47866	0.000244782	0.00301618	1	-1.28389	-2.43494	0.000298454	0.00163023	-1	7.70322	6.41933	8.18173	7.72889
1436610_at	Ankrd12	ankyrin repeat domain 12	106585	1.13078	2.18977	8.41884e-06	0.000443527	1	0.722795	1.65038	0.00101767	0.00787178	0	-0.458694	-1.3743	0.0232948	0.051629	0	7.83058	7.37189	8.50267	8.09468
1449340_at	Sostdc1	sclerostin domain containing 1	66042	1.04787	2.06747	8.42358e-06	0.000443527	1	1.07458	2.10611	6.12195e-06	0.00030926	1	-1.27034	-2.41218	6.51681e-07	1.64747e-05	-1	11.5143	10.244	11.2919	11.3186
1424415_s_at	Spon1	spondin 1, (f-spondin) extracellular matrix protein	233744	-1.56588	-2.96058	8.43963e-06	0.000443618	-1	-1.37355	-2.59108	4.09769e-05	0.00096843	-1	-0.46885	-1.38401	0.0841177	0.144908	0	9.47027	9.00142	7.43554	7.62786
1448696_at	Heph	hephaestin	15203	1.24827	2.37556	8.49733e-06	0.000444387	1	0.772954	1.70876	0.00134695	0.00955357	0	-1.26819	-2.40859	6.95647e-06	9.31139e-05	-1	9.70309	8.4349	9.68317	9.20785
1423826_at	Noc4l	nucleolar complex associated 4 homolog (S. cerevisiae)	100608	-1.38024	-2.60312	8.52425e-06	0.000445043	-1	-0.946345	-1.92698	0.000543442	0.00508154	0	1.15231	2.2227	7.23225e-05	0.000552048	1	9.39931	10.5516	9.17138	9.60527
1431108_at	2410131K14Rik	RIKEN cDNA 2410131K14 gene	76792	-1.03836	-2.0539	8.61112e-06	0.000447882	-1	-0.769322	-1.70447	0.000257925	0.00312173	0	0.880027	1.84041	6.17044e-05	0.000490845	0	2.34291	3.22293	2.18457	2.45361
1448713_at	Stat4	signal transducer and activator of transcription 4	20849	-2.4031	-5.2894	8.61895e-06	0.000447882	-1	-2.48049	-5.58088	5.76473e-06	0.000305335	-1	4.97742	31.5031	1.74319e-10	4.4237e-08	1	3.79931	8.77673	6.37362	6.29623
1429760_at	Rps6ka6	ribosomal protein S6 kinase polypeptide 6	67071	1.54005	2.90805	8.64989e-06	0.000448577	1	0.735762	1.66528	0.00923957	0.0370157	0	-0.489508	-1.40397	0.0685597	0.122912	0	5.74005	5.25054	6.79059	5.9863
1455818_at	4930427A07Rik	RIKEN cDNA 4930427A07 gene	104732	-1.69963	-3.24817	8.78177e-06	0.00045335	-1	-1.44833	-2.72891	5.90677e-05	0.00120154	-1	0.837412	1.78684	0.00763517	0.020971	0	7.60351	8.44093	6.7413	6.9926
1458823_at				1.41606	2.66856	8.80484e-06	0.00045335	1	1.94967	3.86286	1.10282e-07	3.02153e-05	1	-1.68713	-3.22016	8.71282e-07	2.0386e-05	-1	8.03741	6.35028	7.76634	8.29995
1435026_at	Spock2	sparc/osteonectin, cwcv and kazal-like domains proteoglycan 2	94214	3.19275	9.1435	8.88827e-06	0.000456353	1	4.08082	16.9219	3.27952e-07	5.56008e-05	1	-3.5704	-11.8795	2.08452e-06	3.84247e-05	-1	7.77828	4.20788	7.40063	8.2887
1421319_at	Ptgfrn	prostaglandin F2 receptor negative regulator	19221	-1.3705	-2.5856	8.93881e-06	0.000458188	-1	-1.44707	-2.72653	4.46849e-06	0.000262445	-1	1.56605	2.96093	1.56852e-06	3.099e-05	1	3.78051	5.34655	3.97606	3.89949
1452954_at	Ube2c	ubiquitin-conjugating enzyme E2C	68612	-1.34832	-2.54615	8.97522e-06	0.000458461	-1	-1.29215	-2.44893	1.51958e-05	0.000521576	-1	0.630156	1.54773	0.0107915	0.0276691	0	10.602	11.2322	9.88388	9.94005
1455029_at	Kif21a	kinesin family member 21A	16564	1.26988	2.41142	9.05096e-06	0.000460884	1	1.2706	2.41262	8.98697e-06	0.000375995	1	-1.97031	-3.91852	1.88679e-08	1.33368e-06	-1	11.9301	9.95983	11.2297	11.2304
1449877_s_at	Kifc5b	kinesin family member C5B	16580	-1.58178	-2.99338	9.0696e-06	0.000461075	-1	-1.4136	-2.66401	3.52913e-05	0.000880434	-1	0.972394	1.96209	0.00149592	0.00575611	0	8.4447	9.41709	7.83532	8.00349
1448441_at	Cks1b	CDC28 protein kinase 1b	54124	-1.20448	-2.30454	9.10539e-06	0.000461379	-1	-1.12437	-2.18007	2.11717e-05	0.000633309	-1	0.563845	1.4782	0.01076	0.0275992	0	11.3069	11.8707	10.6662	10.7463
1439571_at	E230008J23Rik	RIKEN cDNA E230008J23 gene	319683	1.00963	2.01339	9.18923e-06	0.000464109	1	0.414371	1.33272	0.0227322	0.0710466	0	-0.410482	-1.32913	0.0238642	0.0526162	0	8.05672	7.64624	8.65587	8.06061
1449060_at	Kif2c	kinesin family member 2C	73804	-2.36166	-5.13962	9.36679e-06	0.000471538	-1	-2.42634	-5.37527	6.66053e-06	0.000320156	-1	2.10928	4.31475	3.66215e-05	0.000327499	1	4.81308	6.92236	4.5607	4.49602
1417698_at	Gtf2f1	general transcription factor IIF, polypeptide 1	98053	-0.835635	-1.78464	9.55467e-06	0.000480215	0	-0.762197	-1.69607	2.9179e-05	0.00078372	0	1.0055	2.00764	8.31572e-07	1.9653e-05	1	11.5118	12.5173	11.6817	11.7551
1421931_at	Icos	inducible T cell co-stimulator	54167	-1.89691	-3.72414	9.63888e-06	0.000483663	-1	-1.27423	-2.41869	0.000718992	0.00617819	-1	4.72566	26.4585	9.08534e-12	6.81937e-09	1	3.89682	8.62248	6.72557	7.34825
1450811_at	Sprr2j-ps	small proline-rich protein 2J, pseudogene	20764	-5.81368	-56.2462	9.67197e-06	0.000483846	-1	-5.64305	-49.972	1.3985e-05	0.000496899	-1	8.56358	378.35	4.50913e-08	2.42769e-06	1	2.87898	11.4426	5.62887	5.79951
1423801_a_at	Aprt	adenine phosphoribosyl transferase	11821	-0.748807	-1.6804	9.70529e-06	0.000484638	0	-0.712507	-1.63865	1.7881e-05	0.000573081	0	1.39775	2.6349	1.11583e-09	1.7102e-07	1	10.8463	12.2441	11.4952	11.5316
1423809_at	Tcf19	transcription factor 19	106795	-1.14511	-2.21163	9.73817e-06	0.000485157	-1	-0.907272	-1.8755	0.000142971	0.00213732	0	0.351446	1.27584	0.0803677	0.139731	0	10.8463	11.1977	10.0526	10.2905
1456888_at	Pfkfb4	6-phosphofructo-2-kinase/fructose-2,6-biphosphatase 4	270198	-0.860455	-1.81561	9.74701e-06	0.000485157	0	-0.796119	-1.73642	2.51193e-05	0.000710871	0	2.0944	4.27049	1.36955e-11	8.6533e-09	1	8.30578	10.4002	9.53973	9.60407
1457830_at				-1.19945	-2.29653	9.80233e-06	0.000487127	-1	-1.23098	-2.34726	7.07124e-06	0.000330224	-1	1.24152	2.36448	6.34436e-06	8.70662e-05	1	4.74309	5.98461	4.78516	4.75363
1434474_at	Abca5	ATP-binding cassette, sub-family A (ABC1), member 5	217265	1.91694	3.7762	9.86749e-06	0.000489579	1	1.91459	3.77006	1.00195e-05	0.000402861	1	-3.15169	-8.88695	8.56007e-09	7.61551e-07	-1	10.2874	7.13569	9.05263	9.05028
1423176_at	Tob1	transducer of ErbB-2.1	22057	1.09438	2.13522	9.9402e-06	0.000490816	1	0.768714	1.70375	0.000485716	0.00470961	0	-1.14152	-2.20614	5.83259e-06	8.14511e-05	-1	10.9433	9.80177	10.8962	10.5705
1447124_at				0.963774	1.95041	9.94081e-06	0.000490816	0	0.960323	1.94575	1.03953e-05	0.000413145	0	-1.09783	-2.14032	1.83523e-06	3.50516e-05	-1	7.68647	6.58864	7.55241	7.54896
1426383_at	Cry2	cryptochrome 2 (photolyase-like)	12953	0.729276	1.65781	9.9514e-06	0.000490816	0	1.02094	2.02923	9.9668e-08	2.81985e-05	1	-0.94977	-1.93156	2.85358e-07	8.97834e-06	0	10.3066	9.35681	10.0861	10.3777
1438658_a_at	S1pr3	sphingosine-1-phosphate receptor 3	13610	-2.46562	-5.52365	9.95583e-06	0.000490816	-1	-1.70366	-3.25725	0.000567644	0.00523667	-1	0.933064	1.90933	0.0349031	0.0712186	0	9.23126	10.1643	7.6987	8.46067
1454315_at	3300002A11Rik	RIKEN cDNA 3300002A11 gene	100503812	1.9769	3.93646	1.01266e-05	0.000495702	1	2.20144	4.5994	2.53374e-06	0.000183711	1	-1.8447	-3.59178	2.35461e-05	0.000233262	-1	6.09455	4.24985	6.22675	6.45129
1429779_at	Eif2c4	eukaryotic translation initiation factor 2C, 4	76850	1.30432	2.46967	1.0151e-05	0.000495702	1	1.34813	2.54581	6.69599e-06	0.000320414	1	-1.03558	-2.04994	0.000144832	0.000929329	-1	11.0026	9.96706	11.2714	11.3152
1419357_at	Isy1	ISY1 splicing factor homolog (S. cerevisiae)	57905	-1.02441	-2.03412	1.02728e-05	0.000500072	-1	-1.00599	-2.00832	1.28611e-05	0.000475026	-1	1.02498	2.03494	1.02011e-05	0.000122794	1	8.5565	9.58149	8.55708	8.5755
1455609_at	Cit	citron	12704	-1.16053	-2.2354	1.03634e-05	0.000503478	-1	-0.655867	-1.57556	0.00318463	0.0172915	0	0.400537	1.32	0.0527315	0.0995346	0	7.23454	7.63508	6.47455	6.97922
1451340_at	Arid5a	AT rich interactive domain 5A (MRF1-like)	214855	-0.98976	-1.98585	1.03753e-05	0.000503478	0	-1.07588	-2.10801	3.57434e-06	0.000232647	-1	1.23661	2.35644	5.3945e-07	1.43023e-05	1	5.07533	6.31193	5.32217	5.23605
1433635_at	Wdr18	WD repeat domain 18	216156	-1.21456	-2.3207	1.04091e-05	0.000503738	-1	-1.21779	-2.3259	1.00704e-05	0.000403225	-1	1.10271	2.14757	3.33838e-05	0.000304437	1	7.45317	8.55587	7.34132	7.33809
1423929_at	Ubac2	ubiquitin associated domain containing 2	68889	-0.750971	-1.68293	1.0471e-05	0.000505312	0	-0.633144	-1.55094	7.78246e-05	0.00143848	0	1.37054	2.58567	1.76907e-09	2.4783e-07	1	8.57274	9.94328	9.19231	9.31014
1416077_at	Adm	adrenomedullin	11535	-2.24863	-4.7523	1.04784e-05	0.000505312	-1	-1.93556	-3.82526	6.18199e-05	0.00124282	-1	0.850329	1.80291	0.0356875	0.0724467	0	9.28497	10.1353	7.88667	8.19974
1437181_at	Peli2	pellino 2	93834	1.20203	2.30064	1.05167e-05	0.000506373	1	1.58097	2.99171	2.63988e-07	5.07645e-05	1	-1.98392	-3.95566	8.73074e-09	7.66102e-07	-1	8.96847	6.98455	8.18659	8.56552
1435575_at	Kntc1	kinetochore associated 1	208628	-1.68351	-3.21208	1.06137e-05	0.000509457	-1	-1.6978	-3.24407	9.55139e-06	0.000392303	-1	0.984037	1.97799	0.00249317	0.00856508	0	8.54503	9.52906	7.84556	7.83126
1417027_at	Trim2	tripartite motif-containing 2	80890	1.1239	2.17935	1.06414e-05	0.000509996	1	1.17751	2.26187	5.91097e-06	0.00030778	1	-1.92217	-3.78991	5.07181e-09	5.23411e-07	-1	12.246	10.3238	11.4477	11.5013
1441937_s_at	Pink1	PTEN induced putative kinase 1	68943	0.895116	1.85976	1.071e-05	0.000512491	0	1.06641	2.09422	1.08201e-06	0.000109413	1	-0.990725	-1.98718	2.9155e-06	4.88971e-05	0	13.2945	12.3037	13.1988	13.3701
1448155_at	Pdcd6ip	programmed cell death 6 interacting protein	18571	0.76937	1.70453	1.07622e-05	0.000513123	0	0.60564	1.52165	0.000166457	0.00239141	0	-1.00616	-2.00856	2.94198e-07	9.19252e-06	-1	9.24384	8.23767	9.00704	8.84331
1450156_a_at	Hmmr	hyaluronan mediated motility receptor (RHAMM)	15366	-1.8174	-3.52446	1.08297e-05	0.000513123	-1	-2.24141	-4.7286	6.78807e-07	8.18643e-05	-1	1.49144	2.81169	0.000107623	0.000746918	1	7.11153	8.60296	6.78556	6.36155
1450842_a_at	Cenpa	centromere protein A	12615	-1.31472	-2.48754	1.08381e-05	0.000513123	-1	-0.969774	-1.95853	0.000323734	0.00357574	0	0.604237	1.52017	0.0130724	0.0322899	0	10.2503	10.8546	9.53983	9.88478
1428480_at	Cdca8	cell division cycle associated 8	52276	-2.08783	-4.25108	1.08392e-05	0.000513123	-1	-1.82532	-3.54386	5.34956e-05	0.00112898	-1	1.22694	2.3407	0.00242223	0.008371	1	7.60396	8.8309	6.74307	7.00558
1434150_a_at				1.67333	3.1895	1.09038e-05	0.000515392	1	1.31729	2.49197	0.000168209	0.00240477	1	-1.8784	-3.67666	2.46485e-06	4.30653e-05	-1	11.186	9.30761	10.9809	10.6249
1427012_at	Lancl1	LanC (bacterial lantibiotic synthetase component C)-like 1	14768	0.965772	1.95311	1.09635e-05	0.000517422	0	1.05175	2.07304	3.69721e-06	0.000236012	1	-0.558775	-1.47302	0.00275468	0.00927109	0	9.20731	8.64853	9.61431	9.70028
1418675_at	Osmr	oncostatin M receptor	18414	-1.56143	-2.95145	1.105e-05	0.000519134	-1	-1.87457	-3.66692	1.00797e-06	0.00010437	-1	1.58938	3.00919	8.85502e-06	0.000110948	1	6.72984	8.31922	6.75779	6.44465
1455771_at	Bzrap1	benzodiazepine receptor associated protein 1	207777	1.54764	2.92339	1.11744e-05	0.000524181	1	0.573076	1.48769	0.0401581	0.107076	0	0.982053	1.97527	0.00131836	0.00519472	0	2.89757	3.87962	5.42726	4.4527
1421167_at	Atp11a	ATPase, class VI, type 11A	50770	-1.2852	-2.43716	1.12235e-05	0.000525597	-1	-0.849651	-1.80206	0.000926279	0.00735323	0	1.18047	2.26651	3.12874e-05	0.000289994	1	6.04411	7.22458	5.93938	6.37493
1460685_at	Timm17b	translocase of inner mitochondrial membrane 17b	21855	-1.144	-2.20993	1.12412e-05	0.000525597	-1	-0.994583	-1.9925	5.89023e-05	0.00119975	0	0.740626	1.6709	0.0011143	0.00454267	0	7.22184	7.96247	6.81847	6.96788
1442025_a_at				1.78584	3.44819	1.12555e-05	0.000525597	1	1.82159	3.53471	8.78926e-06	0.000370626	1	-1.48358	-2.79641	9.75e-05	0.000691705	-1	9.36004	7.87647	9.66231	9.69806
1456792_at	Tbc1d2	TBC1 domain family, member 2	381605	-1.12852	-2.18634	1.12862e-05	0.000526236	-1	-1.11974	-2.17308	1.24303e-05	0.000464225	-1	1.31553	2.48894	1.54196e-06	3.06769e-05	1	2.47244	3.78797	2.65945	2.66823
1429641_x_at	Lce3b	late cornified envelope 3B	66344	-6.23758	-75.4567	1.13269e-05	0.000527172	-1	-5.42969	-43.1023	5.84785e-05	0.001199	-1	9.99288	1018.96	1.52043e-08	1.15374e-06	1	2.32339	12.3163	6.07869	6.88657
1416342_at	Tnc	tenascin C	21923	-3.5542	-11.7468	1.13495e-05	0.000527172	-1	-2.49216	-5.62619	0.000546014	0.00509789	-1	3.55107	11.7214	1.14738e-05	0.000134404	1	10.1013	13.6523	10.0981	11.1602
1451406_a_at	Pcsk5	proprotein convertase subtilisin/kexin type 5	18552	-1.58554	-3.00121	1.13728e-05	0.000527172	-1	-1.84207	-3.58524	1.62754e-06	0.0001378	-1	0.785355	1.72352	0.00843985	0.0227294	0	7.92325	8.70861	7.12306	6.86654
1458427_at	Brip1	BRCA1 interacting protein C-terminal helicase 1	237911	-1.93189	-3.81554	1.14186e-05	0.00052843	-1	-2.08415	-4.24025	4.36195e-06	0.000260204	-1	1.93156	3.81468	1.14425e-05	0.000134189	1	2.93113	4.86269	2.9308	2.77854
1419874_x_at	Zbtb16	zinc finger and BTB domain containing 16	235320	1.41953	2.67499	1.15183e-05	0.000529877	1	1.49499	2.81862	6.00153e-06	0.00030926	1	-1.28408	-2.43527	3.83005e-05	0.000339669	-1	8.53097	7.24688	8.66641	8.74187
1430811_a_at	Nuf2	NUF2, NDC80 kinetochore complex component, homolog (S. cerevisiae)	66977	-1.44838	-2.72901	1.15835e-05	0.000530611	-1	-1.57259	-2.97438	4.07395e-06	0.000249268	-1	1.13011	2.18875	0.000193999	0.00116309	1	9.13124	10.2613	8.81297	8.68876
1441048_at	5930430L01Rik	RIKEN cDNA 5930430L01 gene	319982	1.30584	2.47228	1.16448e-05	0.000531743	1	1.64627	3.13023	5.41718e-07	7.42106e-05	1	-1.22163	-2.3321	2.61081e-05	0.000252184	-1	6.4542	5.23257	6.53842	6.87884
1422651_at	Adipoq	adiponectin, C1Q and collagen domain containing	11450	1.0346	2.04855	1.17739e-05	0.00053606	1	1.09481	2.13586	5.77537e-06	0.000305335	1	-1.7707	-3.41219	5.7023e-09	5.6224e-07	-1	13.4787	11.708	12.7426	12.8028
1423134_at	Rilpl2	Rab interacting lysosomal protein-like 2	80291	1.04559	2.06421	1.18165e-05	0.000537209	1	0.0784642	1.05589	0.661143	0.789844	0	1.35596	2.55967	3.69376e-07	1.08294e-05	1	8.63051	9.98647	11.0321	10.0649
1424308_at	Slc24a3	solute carrier family 24 (sodium/potassium/calcium exchanger), member 3	94249	2.05489	4.15511	1.1834e-05	0.000537214	1	2.18296	4.54085	5.52314e-06	0.000297903	1	-3.0793	-8.45201	4.44521e-08	2.39762e-06	-1	10.726	7.64671	9.7016	9.82967
1417445_at	Ndc80	NDC80 homolog, kinetochore complex component (S. cerevisiae)	67052	-1.81151	-3.51009	1.18545e-05	0.000537358	-1	-1.9436	-3.84664	4.86977e-06	0.000273614	-1	1.37391	2.59171	0.000263817	0.00147633	1	7.16117	8.53508	6.72357	6.59148
1450044_at	Fzd7	frizzled homolog 7 (Drosophila)	14369	0.719223	1.64629	1.1907e-05	0.00053895	0	0.933384	1.90975	3.68841e-07	6.0741e-05	0	-1.41674	-2.66982	6.08713e-10	1.06839e-07	-1	12.5078	11.0911	11.8103	12.0245
1421806_at	Defb3	defensin beta 3	27358	-4.37593	-20.7628	1.19584e-05	0.000540486	-1	-4.05472	-16.6186	2.99785e-05	0.000795999	-1	9.98436	1012.96	5.38644e-11	2.09414e-08	1	2.5463	12.5307	8.15473	8.47594
1452020_a_at	Siva1	SIVA1, apoptosis-inducing factor	30954	-1.1348	-2.19589	1.20862e-05	0.00054382	-1	-0.920913	-1.89331	0.00013336	0.00205414	0	0.765291	1.69971	0.000818177	0.0035662	0	10.3012	11.0665	9.93171	10.1456
1448191_at	Plk1	polo-like kinase 1 (Drosophila)	18817	-2.29281	-4.90009	1.21192e-05	0.00054382	-1	-1.57439	-2.9781	0.000696098	0.00605031	-1	1.42933	2.69322	0.00161681	0.00611714	1	6.37068	7.80001	5.5072	6.22562
1436847_s_at	Cdca8	cell division cycle associated 8	52276	-1.20457	-2.30468	1.212e-05	0.00054382	-1	-1.11695	-2.16888	3.01075e-05	0.000797373	-1	0.764293	1.69854	0.00139478	0.00543652	0	11.1368	11.9011	10.6965	10.7842
1435634_at	Pcmtd1	protein-L-isoaspartate (D-aspartate) O-methyltransferase domain containing 1	319263	1.12581	2.18223	1.22156e-05	0.000546525	1	0.550577	1.46467	0.00949552	0.0377431	0	-0.718704	-1.6457	0.00133146	0.00523721	0	10.645	9.92631	11.0521	10.4769
1437644_at	B3galt2	UDP-Gal:betaGlcNAc beta 1,3-galactosyltransferase, polypeptide 2	26878	2.01811	4.05054	1.22727e-05	0.000547497	1	1.80348	3.4906	4.67273e-05	0.00103537	1	-2.39334	-5.25373	1.33862e-06	2.75283e-05	-1	7.62231	5.22897	7.24709	7.03245
1421040_a_at	Gsta2	glutathione S-transferase, alpha 2 (Yc2)	14858	1.51015	2.84839	1.23006e-05	0.00054795	1	1.16068	2.23563	0.000237765	0.00296465	1	-0.544164	-1.45817	0.0467165	0.0902159	0	8.0572	7.51304	9.02318	8.67372
1421546_a_at	Racgap1	Rac GTPase-activating protein 1	26934	-1.20499	-2.30535	1.2348e-05	0.000549273	-1	-0.997566	-1.99663	0.00010977	0.00181446	0	0.631839	1.54954	0.00604511	0.017355	0	9.39885	10.0307	8.8257	9.03312
1417194_at	Sod2	superoxide dismutase 2, mitochondrial	20656	-0.98848	-1.98409	1.23704e-05	0.000549408	0	-0.789057	-1.72794	0.000161813	0.00234318	0	1.04576	2.06445	6.09696e-06	8.44573e-05	1	4.01635	5.06211	4.07363	4.27305
1428420_a_at	1200009I06Rik	RIKEN cDNA 1200009I06 gene	74190	-1.39438	-2.62875	1.23865e-05	0.000549408	-1	-1.12738	-2.18461	0.000141644	0.00212673	-1	2.37354	5.18213	6.6225e-09	6.24786e-07	1	5.57581	7.94936	6.55498	6.82198
1419697_at	Cxcl11	chemokine (C-X-C motif) ligand 11	56066	-4.88803	-29.6104	1.24073e-05	0.00054954	-1	-4.84184	-28.6774	1.39442e-05	0.000496793	-1	4.89771	29.8096	1.21082e-05	0.000140453	1	2.02071	6.91842	2.03039	2.07658
1424365_at	1810037I17Rik	RIKEN cDNA 1810037I17 gene	67704	-1.02443	-2.03415	1.24614e-05	0.000550362	-1	-0.84369	-1.79463	0.000117004	0.00189063	0	1.85782	3.62459	2.45044e-09	3.14795e-07	1	10.8695	12.7273	11.7029	11.8836
1436230_at	Gpr114	G protein-coupled receptor 114	382045	-2.22133	-4.66322	1.25342e-05	0.00055279	-1	-1.59771	-3.02664	0.000463143	0.00456217	-1	2.9014	7.47153	3.57023e-07	1.06385e-05	1	4.21586	7.11726	4.89593	5.51955
1447184_at	AU021760	expressed sequence AU021760	106717	1.07804	2.11116	1.26859e-05	0.000557098	1	1.30999	2.4794	9.95054e-07	0.000103379	1	-1.18746	-2.27752	3.71668e-06	5.8534e-05	-1	9.19646	8.009	9.08704	9.31899
1438226_at	AU022252	expressed sequence AU022252	230696	-1.53891	-2.90574	1.27573e-05	0.000558703	-1	-1.52209	-2.87206	1.45998e-05	0.000510745	-1	0.667965	1.58883	0.0194404	0.0446131	0	7.45007	8.11803	6.57913	6.59594
1423092_at	Incenp	inner centromere protein	16319	-1.34859	-2.54663	1.27585e-05	0.000558703	-1	-1.2332	-2.35088	3.71819e-05	0.000908186	-1	0.955512	1.93927	0.000541199	0.00257579	0	8.08685	9.04236	7.69378	7.80916
1455423_at	Khdc1a	KH domain containing 1A	368204	-2.35954	-5.13208	1.28178e-05	0.000560509	-1	-1.96502	-3.90417	0.000106382	0.00177497	-1	3.53847	11.6195	4.84513e-08	2.56419e-06	1	2.04635	5.58482	3.22528	3.6198
1432188_s_at	Nup43	nucleoporin 43	69912	-1.40216	-2.64297	1.29808e-05	0.000566035	-1	-1.51688	-2.86172	4.81322e-06	0.000271434	-1	1.16747	2.24617	0.000107808	0.000747869	1	9.15166	10.3191	8.91697	8.80225
1425106_a_at	Wars	tryptophanyl-tRNA synthetase	22375	-1.36579	-2.57717	1.30318e-05	0.000566666	-1	-1.03513	-2.0493	0.00028686	0.00331539	-1	0.639794	1.55811	0.0127544	0.0316631	0	6.95639	7.59618	6.23039	6.56105
1416575_at	Cdc45	cell division cycle 45 homolog (S. cerevisiae)	12544	-1.5623	-2.95325	1.30522e-05	0.000566689	-1	-1.24447	-2.36932	0.000173106	0.00245055	-1	1.23723	2.35745	0.000183913	0.00111558	1	7.6886	8.92582	7.36352	7.68135
1446771_at	Tuba8	tubulin, alpha 8	53857	-1.46646	-2.76342	1.3069e-05	0.000566689	-1	-1.18978	-2.28119	0.000142959	0.00213732	-1	0.370874	1.29314	0.153387	0.233325	0	8.61205	8.98293	7.51647	7.79314
1419691_at	Camp	cathelicidin antimicrobial peptide	12796	-2.93543	-7.64982	1.31353e-05	0.00056703	-1	-2.15742	-4.46117	0.000390405	0.00406137	-1	2.72504	6.61177	3.20674e-05	0.000295302	1	4.37301	7.09805	4.16262	4.94063
1437361_at	Gm11545	predicted gene 11545	217122	-1.6443	-3.12595	1.33804e-05	0.000573765	-1	-1.49135	-2.81153	4.27305e-05	0.000988003	-1	2.70283	6.5108	1.25892e-08	1.015e-06	1	2.57311	5.27595	3.63165	3.78459
1443536_at	Slc7a11	solute carrier family 7 (cationic amino acid transporter, y+ system), member 11	26570	-2.85902	-7.25521	1.34682e-05	0.00057673	-1	-3.01336	-8.07445	6.9834e-06	0.000328082	-1	3.09279	8.53144	5.00607e-06	7.25599e-05	1	2.80343	5.89622	3.0372	2.88286
1459902_at	2700007P21Rik	RIKEN cDNA 2700007P21 gene	212772	-0.835388	-1.78434	1.35735e-05	0.000580189	0	-0.796891	-1.73735	2.40112e-05	0.000688322	0	1.18352	2.27131	1.20963e-07	4.92764e-06	1	7.93332	9.11685	8.28146	8.31996
1452040_a_at	Cdca3	cell division cycle associated 3	14793	-1.30518	-2.47114	1.37169e-05	0.000584147	-1	-1.28655	-2.43945	1.63491e-05	0.000545441	-1	0.986183	1.98094	0.000308165	0.00167353	0	11.2237	12.2099	10.9047	10.9233
1443639_at	Apcdd1	adenomatosis polyposis coli down-regulated 1	494504	2.24658	4.74556	1.37412e-05	0.000584378	1	2.55354	5.87074	2.67845e-06	0.000190194	1	-4.01656	-16.1848	3.48807e-09	4.11589e-07	-1	10.9725	6.95597	9.20255	9.50951
1428636_at	Steap2	six transmembrane epithelial antigen of prostate 2	74051	-2.58136	-5.98503	1.38034e-05	0.00058562	-1	-2.04173	-4.1174	0.00019522	0.00263417	-1	2.09608	4.27547	0.000148517	0.000948451	1	3.45752	5.5536	2.97224	3.51187
1449149_at	Traf3	TNF receptor-associated factor 3	22031	-1.00123	-2.0017	1.38082e-05	0.00058562	-1	-0.640131	-1.55847	0.00143023	0.00997972	0	0.681596	1.60391	0.000828546	0.00359722	0	7.61297	8.29456	7.29334	7.65443
1419760_a_at	Rwdd2b	RWD domain containing 2B	53858	-0.864001	-1.82008	1.38528e-05	0.000586309	0	-1.07599	-2.10817	7.82496e-07	9.046e-05	-1	0.992926	1.99022	2.33439e-06	4.16318e-05	0	8.34231	9.33524	8.47124	8.25924
1419943_s_at	Ccnb1	cyclin B1	268697	-2.09311	-4.26667	1.38623e-05	0.000586309	-1	-2.39843	-5.2723	2.42868e-06	0.000177751	-1	1.79782	3.47694	8.14371e-05	0.000600177	1	9.35767	11.1555	9.06237	8.75705
1417236_at	Ehd3	EH-domain containing 3	57440	-1.24001	-2.362	1.39537e-05	0.000588566	-1	-0.342833	-1.26824	0.1224	0.23963	0	0.0333568	1.02339	0.876517	0.913395	0	6.29908	6.33244	5.09243	5.98961
1423847_at	Ncapd2	non-SMC condensin I complex, subunit D2	68298	-1.52196	-2.87181	1.40403e-05	0.000590281	-1	-0.922463	-1.89535	0.00223929	0.013521	0	0.668812	1.58976	0.0189688	0.0436992	0	9.12645	9.79526	8.2733	8.8728
1419099_x_at	Stom	stomatin	13830	-2.54429	-5.83322	1.40608e-05	0.000590281	-1	-2.21232	-4.63421	7.20276e-05	0.00137124	-1	2.92475	7.59341	2.36387e-06	4.1892e-05	1	5.39534	8.32009	5.77579	6.10776
1437287_at	1110020G09Rik	RIKEN cDNA 1110020G09 gene	68646	1.01011	2.01407	1.40824e-05	0.000590281	1	0.727222	1.65545	0.000502188	0.00481951	0	-0.946394	-1.92705	3.07642e-05	0.000286454	0	9.02211	8.07572	9.08583	8.80294
1426423_at	Shmt2	serine hydroxymethyltransferase 2 (mitochondrial)	108037	-1.06574	-2.09325	1.41104e-05	0.000590281	-1	-0.655559	-1.57523	0.00199586	0.0124606	0	0.76409	1.6983	0.000523061	0.00250952	0	8.36184	9.12593	8.06018	8.47037
1422482_at	Ruvbl2	RuvB-like protein 2	20174	-1.34104	-2.53334	1.41279e-05	0.000590281	-1	-0.792709	-1.73232	0.00273604	0.0156028	0	0.452569	1.36847	0.0635305	0.115768	0	10.4528	10.9053	9.56431	10.1126
1420603_s_at				-2.73799	-6.67138	1.41525e-05	0.000590446	-1	-2.58704	-6.00864	2.79872e-05	0.000764096	-1	2.84071	7.16371	8.9644e-06	0.000112137	1	2.18407	5.02478	2.28679	2.43774
1456510_x_at				1.3309	2.5156	1.41814e-05	0.000590446	1	1.07896	2.11251	0.000154598	0.00225985	1	-1.45475	-2.74109	4.62223e-06	6.86351e-05	-1	10.1078	8.65305	9.98395	9.73201
1448225_at	Gpaa1	GPI anchor attachment protein 1	14731	-1.08017	-2.11429	1.42023e-05	0.000590446	-1	-0.51399	-1.42799	0.0121127	0.0449665	0	0.809284	1.75234	0.000344483	0.0018256	0	8.26935	9.07863	7.99845	8.56464
1427945_at	Dpyd	dihydropyrimidine dehydrogenase	99586	2.37111	5.17339	1.43826e-05	0.000596897	1	2.36598	5.15504	1.47683e-05	0.000514611	1	-2.32568	-5.01301	1.81988e-05	0.000190672	-1	5.72539	3.39971	5.77082	5.7657
1418281_at	Rad51	RAD51 homolog (S. cerevisiae)	19361	-2.21748	-4.6508	1.45689e-05	0.000602208	-1	-2.57268	-5.94913	2.17272e-06	0.000165646	-1	1.23577	2.35507	0.00433119	0.0133016	1	6.79996	8.03573	5.81825	5.46305
1437173_at	S1pr3	sphingosine-1-phosphate receptor 3	13610	-2.62783	-6.18095	1.48534e-05	0.000611516	-1	-1.91894	-3.78145	0.000457372	0.00452548	-1	1.101	2.14503	0.0249503	0.0545254	0	7.76442	8.86542	6.23759	6.94648
1434151_at	Mettl7a1	methyltransferase like 7A1	70152	1.10068	2.14456	1.50125e-05	0.000615811	1	1.18249	2.26968	6.12885e-06	0.00030926	1	-1.4131	-2.66309	5.60819e-07	1.47268e-05	-1	12.2218	10.8087	11.9094	11.9912
1420472_at	Mtpn	myotrophin	14489	-0.928208	-1.90291	1.50667e-05	0.000615811	0	-1.01822	-2.02542	4.70494e-06	0.000267766	-1	0.697048	1.62118	0.000353026	0.00185879	0	8.92001	9.61706	8.68885	8.59884
1434936_at	Hirip3	HIRA interacting protein 3	233876	-1.3876	-2.61644	1.5077e-05	0.000615811	-1	-1.15209	-2.22235	0.000126664	0.00198256	-1	0.524125	1.43806	0.0409584	0.0810632	0	8.59017	9.11429	7.72669	7.96221
1441972_at	6230424C14Rik	RIKEN cDNA 6230424C14 gene	67786	-1.43756	-2.70862	1.51372e-05	0.000616641	-1	-0.487969	-1.40247	0.0634899	0.148789	0	-0.037028	-1.026	0.882499	0.918271	0	8.46771	8.43068	6.99312	7.94271
1434484_at	1100001G20Rik	RIKEN cDNA 1100001G20 gene	66107	1.66589	3.17309	1.51967e-05	0.000618254	1	1.41364	2.66409	0.000100898	0.00170606	1	-1.96332	-3.89957	1.84372e-06	3.51704e-05	-1	12.6943	10.731	12.3969	12.1446
1422784_at	Krt6a	keratin 6A	16687	-2.053	-4.14967	1.52574e-05	0.000618654	-1	-2.09758	-4.27991	1.17171e-05	0.000446957	-1	1.88624	3.69671	4.16659e-05	0.000361136	1	12.1629	14.0491	11.9961	11.9515
1428034_a_at	Tnfrsf9	tumor necrosis factor receptor superfamily, member 9	21942	-3.0147	-8.08193	1.53388e-05	0.000620063	-1	-3.36204	-10.282	3.87089e-06	0.000242107	-1	3.57155	11.889	1.73627e-06	3.34297e-05	1	2.12941	5.70097	2.68627	2.33892
1443082_at				1.31205	2.48294	1.53414e-05	0.000620063	1	0.590326	1.50559	0.0173448	0.0584708	0	-0.319234	-1.24767	0.174047	0.257711	0	8.36622	8.04699	9.35904	8.63731
1417725_a_at	Sssca1	Sjogren's syndrome/scleroderma autoantigen 1 homolog (human)	56390	-1.10605	-2.15256	1.53638e-05	0.000620162	-1	-0.677176	-1.59901	0.00219132	0.0133418	0	0.668617	1.58955	0.00242358	0.00837245	0	9.29529	9.9639	8.85785	9.28673
1446730_at				0.881682	1.84252	1.54167e-05	0.000621487	0	1.50224	2.83281	8.62591e-09	5.04906e-06	1	-0.8091	-1.75212	4.26581e-05	0.000367779	0	8.94442	8.13532	9.01701	9.63756
1417290_at	Lrg1	leucine-rich alpha-2-glycoprotein 1	76905	-2.12093	-4.34975	1.54633e-05	0.000621778	-1	-1.72426	-3.30411	0.000161676	0.0023423	-1	-0.116476	-1.08408	0.753339	0.816331	0	9.19264	9.07617	6.95523	7.35191
1424107_at	Kif18a	kinesin family member 18A	228421	-1.70151	-3.25241	1.54692e-05	0.000621778	-1	-2.00715	-4.01988	1.85697e-06	0.000150109	-1	1.51003	2.84816	6.25748e-05	0.000496112	1	6.9929	8.50292	6.80141	6.49577
1425815_a_at	Hmmr	hyaluronan mediated motility receptor (RHAMM)	15366	-1.47355	-2.77705	1.54842e-05	0.000621778	-1	-1.87038	-3.6563	6.81423e-07	8.18643e-05	-1	1.32065	2.49779	5.6071e-05	0.000454202	1	9.12479	10.4454	8.97188	8.57505
1433543_at	Anln	anillin, actin binding protein	68743	-1.30593	-2.47243	1.56113e-05	0.000623645	-1	-1.35743	-2.56228	9.68537e-06	0.000395071	-1	0.533315	1.44725	0.0289148	0.0613615	0	8.88371	9.41703	8.1111	8.0596
1434917_at	Cobl	cordon-bleu	12808	1.26892	2.40981	1.56488e-05	0.000624341	1	1.66354	3.16794	4.38062e-07	6.7812e-05	1	-1.84158	-3.58402	1.00658e-07	4.31032e-06	-1	10.9689	9.12733	10.3962	10.7909
1419098_at	Stom	stomatin	13830	-2.60289	-6.07501	1.58882e-05	0.000631448	-1	-2.30709	-4.94883	6.50313e-05	0.00128009	-1	3.14293	8.83317	1.39537e-06	2.84029e-05	1	4.62604	7.76897	5.16608	5.46188
1429918_at	Arhgap20	Rho GTPase activating protein 20	244867	2.02392	4.06686	1.59159e-05	0.00063174	1	2.24652	4.74536	4.2807e-06	0.000258274	1	-3.59358	-12.0719	4.70552e-09	5.00628e-07	-1	9.49587	5.90229	7.92621	8.14881
1455059_at	Helz	helicase with zinc finger domain	78455	0.986238	1.98101	1.59513e-05	0.000632335	0	0.987547	1.98281	1.56957e-05	0.000533998	0	-1.22894	-2.34394	9.10692e-07	2.10424e-05	-1	8.78184	7.5529	8.53914	8.54045
1422252_a_at	Cdc25c	cell division cycle 25 homolog C (S. pombe)	12532	-2.24036	-4.72514	1.60228e-05	0.000634354	-1	-1.99273	-3.97991	6.30153e-05	0.00125383	-1	1.54102	2.90999	0.000842212	0.00364786	1	7.73	9.27101	7.03065	7.27828
1449833_at	Sprr2f	small proline-rich protein 2F	20760	-4.63007	-24.7623	1.6126e-05	0.000637049	-1	-4.21916	-18.6249	4.82272e-05	0.00105595	-1	7.59599	193.474	1.64212e-08	1.21439e-06	1	4.44791	12.0439	7.41384	7.82475
1451204_at	Scara5	scavenger receptor class A, member 5 (putative)	71145	1.7138	3.28024	1.61508e-05	0.000637049	1	1.6141	3.06122	3.30015e-05	0.000844403	1	-1.69914	-3.24708	1.7925e-05	0.00018827	-1	12.9969	11.2977	13.0115	12.9118
1445445_s_at				-1.33125	-2.5162	1.63827e-05	0.000644482	-1	-1.76503	-3.3988	3.93881e-07	6.35134e-05	-1	1.76458	3.39775	3.95301e-07	1.14059e-05	1	2.02184	3.78642	2.45517	2.02139
1416607_at	4931406C07Rik	RIKEN cDNA 4931406C07 gene	70984	1.043	2.06051	1.64667e-05	0.000645748	1	0.807886	1.75064	0.000279411	0.00326683	0	-1.22968	-2.34514	2.00424e-06	3.74933e-05	-1	9.88527	8.6556	9.6986	9.46348
1420032_at	Chek1	checkpoint kinase 1	12649	-1.05532	-2.07818	1.65829e-05	0.000648241	-1	-1.0477	-2.06723	1.81054e-05	0.000576496	-1	0.953394	1.93642	5.46037e-05	0.000445815	0	7.176	8.1294	7.07407	7.08169
1448314_at	Cdk1	cyclin-dependent kinase 1	12534	-1.42573	-2.6865	1.66504e-05	0.000650059	-1	-1.46893	-2.76817	1.15456e-05	0.000442938	-1	0.852055	1.80507	0.00278957	0.00936408	0	10.9486	11.8007	10.3749	10.3317
1429295_s_at	Trip13	thyroid hormone receptor interactor 13	69716	-1.50142	-2.83121	1.70174e-05	0.000662715	-1	-1.5483	-2.92473	1.16746e-05	0.000446779	-1	1.1109	2.15981	0.000448817	0.00223255	1	8.6856	9.7965	8.29508	8.24819
1450692_at	Kif4	kinesin family member 4	16571	-1.39138	-2.62329	1.71548e-05	0.000666644	-1	-1.35563	-2.55909	2.34569e-05	0.000679351	-1	1.47963	2.78877	8.01693e-06	0.000103591	1	7.24441	8.72404	7.33266	7.36841
1436119_at	Aldh1l2	aldehyde dehydrogenase 1 family, member L2	216188	-1.5946	-3.02012	1.74034e-05	0.000673816	-1	-1.7748	-3.4219	4.54627e-06	0.000263022	-1	2.06309	4.17881	5.96693e-07	1.54293e-05	1	5.86551	7.92861	6.334	6.15381
1429284_at	Mob3b	MOB kinase activator 3B	214944	0.860499	1.81567	1.74277e-05	0.000673816	0	0.660736	1.58089	0.000319142	0.00354271	0	-1.06543	-2.09279	1.09922e-06	2.41018e-05	-1	10.4631	9.39769	10.2582	10.0584
1423552_at	Leprotl1	leptin receptor overlapping transcript-like 1	68192	-0.844263	-1.79535	1.7433e-05	0.000673816	0	-0.634325	-1.55221	0.000394772	0.00408649	0	1.07853	2.11189	7.13783e-07	1.77073e-05	1	10.503	11.5815	10.7372	10.9472
1421117_at	Dst	dystonin	13518	1.01236	2.01721	1.75177e-05	0.000675359	1	0.946071	1.92662	3.90476e-05	0.00093787	0	-0.61036	-1.52664	0.00269192	0.00910982	0	12.6924	12.0821	13.0944	13.0282
1423476_at	Slc46a2	solute carrier family 46, member 2	30936	1.19505	2.28952	1.75613e-05	0.000675401	1	1.69787	3.24421	1.58101e-07	3.7468e-05	1	-1.12015	-2.1737	3.78045e-05	0.00033604	-1	11.0823	9.96218	11.1572	11.66
1423844_s_at	Cbs	cystathionine beta-synthase	12411	3.6016	12.1392	1.76118e-05	0.000676445	1	3.924	15.1789	6.05788e-06	0.00030926	1	-5.03148	-32.7059	2.02683e-07	6.97229e-06	-1	10.1919	5.16038	8.76198	9.08438
1445501_at				1.225	2.33756	1.76321e-05	0.000676445	1	1.514	2.85601	1.14178e-06	0.000112694	1	-1.50152	-2.8314	1.27857e-06	2.66743e-05	-1	6.06908	4.56756	5.79257	6.08156
1437451_at	Ecscr	endothelial cell-specific chemotaxis regulator	68545	-1.21932	-2.32836	1.76966e-05	0.000678078	-1	-0.994753	-1.99274	0.000174991	0.00246372	0	1.07066	2.1004	7.9638e-05	0.000591922	1	10.2228	11.2935	10.0742	10.2987
1435009_at	Slc9a6	solute carrier family 9 (sodium/hydrogen exchanger), member 6	236794	-0.739283	-1.66935	1.78093e-05	0.000680702	0	-0.602337	-1.51817	0.000178361	0.00248741	0	1.10872	2.15654	7.24488e-08	3.39337e-06	1	8.61196	9.72069	8.9814	9.11835
1451703_s_at	Aprt	adenine phosphoribosyl transferase	11821	-0.613973	-1.53047	1.7926e-05	0.000681804	0	-0.654783	-1.57438	8.0953e-06	0.000353998	0	1.22457	2.33686	8.56252e-10	1.39524e-07	1	11.0494	12.274	11.66	11.6192
1428430_at	Rgmb	RGM domain family, member B	68799	1.34499	2.54029	1.80222e-05	0.000684622	1	1.50423	2.83673	4.43324e-06	0.000261933	1	-2.16308	-4.47871	2.56433e-08	1.64713e-06	-1	10.3829	8.21981	9.5648	9.72403
1425398_at				-1.50986	-2.84783	1.80758e-05	0.000685817	-1	-2.15258	-4.44622	1.55641e-07	3.73538e-05	-1	2.28686	4.87993	6.36791e-08	3.11564e-06	1	7.11517	9.40203	7.89217	7.24945
1457374_at	Nedd4l	neural precursor cell expressed, developmentally down-regulated gene 4-like	83814	0.707862	1.63338	1.81004e-05	0.000685908	0	0.713967	1.64031	1.63104e-05	0.000545323	0	-1.16949	-2.24932	1.70656e-08	1.25123e-06	-1	6.33921	5.16973	5.87759	5.88369
1449449_at	Ptges	prostaglandin E synthase	64292	-2.11282	-4.32536	1.84299e-05	0.000692463	-1	-1.31869	-2.49439	0.00211823	0.0130077	-1	2.2216	4.66411	9.94921e-06	0.000120653	1	7.381	9.6026	7.48978	8.28392
1448998_at	Lpo	lactoperoxidase	76113	-3.1728	-9.01794	1.84894e-05	0.000693692	-1	-2.18736	-4.5547	0.000916948	0.00730162	-1	8.21239	296.603	1.16826e-11	7.76544e-09	1	2.14526	10.3576	7.18485	8.17029
1416034_at	Cd24a	CD24a antigen	12484	-0.989684	-1.98575	1.85529e-05	0.000693717	0	-1.10318	-2.14827	4.77447e-06	0.000270233	-1	1.35162	2.55199	2.98882e-07	9.27506e-06	1	11.4914	12.8431	11.8534	11.7399
1443993_at	Zc3h12a	zinc finger CCCH type containing 12A	230738	-1.23799	-2.3587	1.86671e-05	0.00069656	-1	-0.819571	-1.76488	0.00131337	0.00939295	0	1.61489	3.06288	5.76975e-07	1.5011e-05	1	4.72321	6.3381	5.10011	5.51853
1456836_at	Itk	IL2 inducible T cell kinase	16428	-1.31227	-2.48332	1.86739e-05	0.00069656	-1	-1.22341	-2.33497	4.2663e-05	0.00098718	-1	1.44168	2.71636	5.79483e-06	8.10333e-05	1	2.0617	3.50338	2.19111	2.27997
1428104_at	Tpx2	TPX2, microtubule-associated protein homolog (Xenopus laevis)	72119	-1.66022	-3.16064	1.87273e-05	0.000697711	-1	-1.65019	-3.13876	2.01442e-05	0.000614448	-1	1.45753	2.74637	8.40312e-05	0.00061591	1	9.28277	10.7403	9.08008	9.0901
1453159_at	Efhc1	EF-hand domain (C-terminal) containing 1	71877	1.31934	2.49552	1.88502e-05	0.000699909	1	1.43713	2.70782	6.52621e-06	0.000319855	1	-1.9496	-3.86268	9.6741e-08	4.1831e-06	-1	6.06191	4.11231	5.43165	5.54944
1450886_at	Gsg2	germ cell-specific gene 2	14841	-1.61051	-3.0536	1.89512e-05	0.000700466	-1	-1.66831	-3.17842	1.23254e-05	0.00046142	-1	1.14171	2.20643	0.00072683	0.00324667	1	6.76008	7.90179	6.29128	6.23348
1418154_at	N4bp1	NEDD4 binding protein 1	80750	-1.02437	-2.03408	1.91232e-05	0.000703989	-1	-0.808165	-1.75098	0.000263103	0.00315624	0	1.32181	2.4998	6.90566e-07	1.72419e-05	1	8.25968	9.5815	8.55712	8.77333
1457147_at	Etl4	enhancer trap locus 4	208618	1.7726	3.41668	1.92815e-05	0.000708972	1	2.28529	4.87461	7.05748e-07	8.33968e-05	1	-1.83807	-3.57532	1.23893e-05	0.000143125	-1	6.94885	5.11077	6.88337	7.39606
1436592_at	Zfp799	zinc finger protein 799	240064	2.23457	4.70623	1.93935e-05	0.00071056	1	0.966017	1.95344	0.0237915	0.07339	0	0.366516	1.28924	0.361891	0.460299	0	3.43117	3.79769	6.03226	4.76371
1436737_a_at	Sorbs1	sorbin and SH3 domain containing 1	20411	1.08038	2.11459	1.95603e-05	0.000714135	1	1.10347	2.14871	1.51357e-05	0.00052139	1	-1.80057	-3.48357	1.64743e-08	1.21439e-06	-1	10.7436	8.94299	10.0234	10.0465
1417623_at	Slc12a2	solute carrier family 12, member 2	20496	1.70517	3.26066	1.97684e-05	0.000720034	1	1.83869	3.57684	7.80184e-06	0.000348047	1	-1.38873	-2.61848	0.000195853	0.0011708	-1	9.4988	8.11007	9.81523	9.94875
1440717_at	AA407881	expressed sequence AA407881	101931	0.93469	1.91148	1.99188e-05	0.00072381	0	0.648868	1.56794	0.000910815	0.00727149	0	-1.29519	-2.45409	2.64093e-07	8.4641e-06	-1	8.64128	7.34609	8.28078	7.99496
1439105_at	Cdadc1	cytidine and dCMP deaminase domain containing 1	71891	0.945059	1.92527	2.00534e-05	0.000726993	0	0.809877	1.75306	0.000116161	0.0018829	0	-1.35757	-2.56254	1.58047e-07	5.89237e-06	-1	8.10574	6.74816	7.69322	7.55804
1421498_a_at	2010204K13Rik	RIKEN cDNA 2010204K13 gene	68355	-1.27725	-2.42377	2.03525e-05	0.000733545	-1	-1.02863	-2.04008	0.000225178	0.00286628	-1	1.27999	2.42837	1.98356e-05	0.000203714	1	3.4041	4.68409	3.40684	3.65546
1426436_at	Tmem159	transmembrane protein 159	233806	0.803446	1.74526	2.04162e-05	0.000734794	0	1.14703	2.21458	1.76747e-07	4.00434e-05	1	-1.28539	-2.43748	3.25078e-08	1.95029e-06	-1	11.9071	10.6217	11.4252	11.7688
1450119_at	Dst	dystonin	13518	1.20174	2.30016	2.04347e-05	0.000734794	1	1.25338	2.38399	1.22417e-05	0.000460465	1	-0.876782	-1.83628	0.00059097	0.00274654	0	12.0133	11.1365	12.3383	12.3899
1425412_at	Nlrp3	NLR family, pyrin domain containing 3	216799	-1.93409	-3.82138	2.04768e-05	0.0007352	-1	-1.9233	-3.7929	2.18973e-05	0.000645288	-1	1.93142	3.81432	2.0819e-05	0.0002118	1	3.12965	5.06107	3.12698	3.13777
1422944_a_at	Diap3	diaphanous homolog 3 (Drosophila)	56419	-1.4849	-2.79897	2.05107e-05	0.0007352	-1	-1.44305	-2.71895	2.88131e-05	0.00078045	-1	0.719968	1.64715	0.012972	0.0320879	0	6.86706	7.58703	6.10213	6.14398
1456077_x_at	Cdc25c	cell division cycle 25 homolog C (S. pombe)	12532	-1.71167	-3.27539	2.05413e-05	0.0007352	-1	-1.67917	-3.20244	2.58174e-05	0.000724014	-1	1.23547	2.35457	0.000655408	0.00298887	1	9.09464	10.3301	8.61844	8.65094
1433727_at	Glb1l2	galactosidase, beta 1-like 2	244757	1.49819	2.82487	2.05647e-05	0.0007352	1	2.04296	4.1209	3.45185e-07	5.78189e-05	1	-3.45627	-10.9759	9.4253e-11	2.86085e-08	-1	9.96438	6.50811	8.0063	8.55107
1434763_at	Orai2	ORAI calcium release-activated calcium modulator 2	269717	-1.31212	-2.48306	2.08159e-05	0.000739909	-1	-1.19395	-2.28778	6.22464e-05	0.00124815	-1	1.51467	2.85733	3.42915e-06	5.48739e-05	1	4.66737	6.18203	4.86992	4.98808
1445027_at	Cdr2l	cerebellar degeneration-related protein 2-like	237988	-1.52929	-2.88644	2.10966e-05	0.000744834	-1	-1.01493	-2.0208	0.00140191	0.00982862	-1	0.654881	1.57449	0.0258665	0.0560922	0	7.68418	8.33906	6.80977	7.32414
1426168_a_at				-2.53271	-5.78658	2.11003e-05	0.000744834	-1	-1.62726	-3.08926	0.001835	0.0117186	-1	5.6831	51.3787	1.54867e-10	4.06328e-08	1	3.33359	9.01669	6.48398	7.38943
1443137_at				1.98478	3.95801	2.11322e-05	0.000744834	1	1.81729	3.52418	5.88754e-05	0.00119975	1	-1.49056	-2.80997	0.000462191	0.00228075	-1	9.13654	7.64598	9.63076	9.46327
1417271_a_at	Eng	endoglin	13805	-1.16722	-2.24578	2.11399e-05	0.000744834	-1	-0.574172	-1.48882	0.0120835	0.0449123	0	0.518109	1.43208	0.021528	0.048438	0	9.56798	10.0861	8.91887	9.51192
1417911_at	Ccna2	cyclin A2	12428	-1.47584	-2.78146	2.11423e-05	0.000744834	-1	-1.33762	-2.52734	6.6017e-05	0.0012936	-1	0.794594	1.73459	0.00681724	0.0191149	0	10.2588	11.0534	9.57754	9.71576
1429293_at	Gpc2	glypican 2 (cerebroglycan)	71951	1.02284	2.03191	2.11469e-05	0.000744834	1	1.2473	2.37397	1.6822e-06	0.000140003	1	-1.2208	-2.33075	2.24419e-06	4.05669e-05	-1	10.008	8.78725	9.81009	10.0345
1418993_s_at	F10	coagulation factor X	14058	-2.1861	-4.55074	2.14117e-05	0.000751595	-1	-2.2336	-4.70304	1.65212e-05	0.000549994	-1	2.56152	5.90328	2.90635e-06	4.87964e-05	1	2.15417	4.71568	2.52958	2.48209
1419372_at	Gosr2	golgi SNAP receptor complex member 2	56494	-1.50392	-2.83612	2.15638e-05	0.000754368	-1	-1.32607	-2.50718	9.11051e-05	0.00159267	-1	2.07817	4.22271	3.02195e-07	9.34661e-06	1	7.11124	9.18941	7.68549	7.86334
1457999_at	Fam82b	family with sequence similarity 82, member B	66302	1.06922	2.09829	2.16991e-05	0.000758243	1	1.03423	2.04802	3.21659e-05	0.000831265	1	-1.10025	-2.14392	1.53558e-05	0.000167674	-1	9.43932	8.33907	9.40829	9.3733
1448624_at	Cd2bp2	CD2 antigen (cytoplasmic tail) binding protein 2	70233	-0.992663	-1.98985	2.18487e-05	0.000761751	0	-0.597615	-1.51321	0.00313337	0.0171002	0	1.14045	2.20449	3.84793e-06	6.0016e-05	1	8.80355	9.94399	8.95133	9.34638
1419944_at				-2.03456	-4.09697	2.19056e-05	0.000762875	-1	-2.20934	-4.62462	7.95434e-06	0.000350807	-1	1.65446	3.14805	0.000217185	0.00126773	1	8.5383	10.1928	8.1582	7.98343
1417094_at	Acot7	acyl-CoA thioesterase 7	70025	-1.47321	-2.7764	2.20221e-05	0.000763392	-1	-0.870057	-1.82773	0.00363676	0.0189744	0	1.10973	2.15806	0.00046403	0.00228837	1	10.5175	11.6273	10.154	10.7572
1421054_at	Xpo4	exportin 4	57258	-1.11451	-2.16522	2.22277e-05	0.000768047	-1	-1.36067	-2.56805	1.75165e-06	0.000144539	-1	1.5034	2.83511	4.41468e-07	1.23467e-05	1	6.86874	8.37215	7.25764	7.01147
1416802_a_at	Cdca5	cell division cycle associated 5	67849	-1.6269	-3.0885	2.25551e-05	0.000776077	-1	-1.66586	-3.17303	1.69641e-05	0.000559328	-1	0.965516	1.95276	0.00355999	0.0113837	0	8.27053	9.23605	7.60914	7.57019
1446316_at	Lpin2	lipin 2	64898	-1.06677	-2.09474	2.26294e-05	0.000777588	-1	-1.37604	-2.59555	8.43285e-07	9.35774e-05	-1	1.32677	2.5084	1.39077e-06	2.83464e-05	1	5.23631	6.56308	5.4963	5.18703
1447926_at	Arl5a	ADP-ribosylation factor-like 5A	75423	-0.658129	-1.57804	2.28007e-05	0.000780875	0	-0.471179	-1.38624	0.000764426	0.00644516	0	1.14104	2.2054	1.08974e-08	9.1336e-07	1	8.11994	9.26098	8.60285	8.7898
1416492_at	Ccne1	cyclin E1	12447	-1.92747	-3.80386	2.28441e-05	0.000781496	-1	-2.0466	-4.13131	1.10068e-05	0.000426497	-1	1.64999	3.13831	0.000131964	0.000872431	1	7.50161	9.1516	7.22413	7.105
1419055_a_at	Ptpn21	protein tyrosine phosphatase, non-receptor type 21	24000	2.73881	6.67519	2.32163e-05	0.000790427	1	3.22793	9.36923	2.94239e-06	0.000202312	1	-3.83224	-14.2436	2.75967e-07	8.79005e-06	-1	6.65579	2.82354	5.56235	6.05147
1440686_at	Prss27	protease, serine, 27	213171	-2.28737	-4.88166	2.32284e-05	0.000790427	-1	-1.40628	-2.65053	0.00277525	0.0157452	-1	5.60619	48.7116	4.05623e-11	1.79401e-08	1	6.26966	11.8759	9.58848	10.4696
1455197_at	Rnd1	Rho family GTPase 1	223881	-2.37901	-5.20179	2.33406e-05	0.000793221	-1	-1.55819	-2.94484	0.00167942	0.011058	-1	3.84989	14.4189	3.23778e-08	1.94644e-06	1	4.26201	8.1119	5.73289	6.55372
1441467_at				1.08963	2.12819	2.38827e-05	0.000807271	1	1.30998	2.47939	2.33347e-06	0.000172833	1	-1.04009	-2.05636	4.11809e-05	0.000358621	-1	7.76674	6.72665	7.81627	8.03663
1445949_at				1.69255	3.23229	2.38844e-05	0.000807271	1	1.06117	2.08663	0.00242616	0.0143156	1	-1.03035	-2.04253	0.00304784	0.0100341	-1	3.71105	2.6807	4.37325	3.74187
1433586_at	Rgmb	RGM domain family, member B	68799	0.951136	1.93339	2.39951e-05	0.000809269	0	1.22109	2.33123	9.63433e-07	0.000101895	1	-1.51221	-2.85247	4.38254e-08	2.37624e-06	-1	11.3866	9.87435	10.8255	11.0954
1442026_at				2.09977	4.28642	2.40471e-05	0.000809269	1	2.39884	5.27378	4.59574e-06	0.000264469	1	-1.62042	-3.07464	0.000394895	0.00202651	-1	9.01888	7.39846	9.49823	9.7973
1451518_at	Zfp709	zinc finger protein 709	236193	1.27778	2.42465	2.40508e-05	0.000809269	1	0.291291	1.22374	0.217702	0.363443	0	0.192459	1.14271	0.409875	0.508912	0	3.00656	3.19902	4.47679	3.49031
1435094_at	Kcnj16	potassium inwardly-rectifying channel, subfamily J, member 16	16517	3.34817	10.1836	2.4071e-05	0.000809269	1	2.67456	6.38443	0.000281558	0.00328031	1	-3.55208	-11.7295	1.17463e-05	0.000136871	-1	6.80384	3.25176	6.59994	5.92632
1448952_at	A030009H04Rik	RIKEN cDNA A030009H04 gene	80515	1.64411	3.12556	2.42086e-05	0.000812323	1	1.80672	3.49847	7.60844e-06	0.000343879	1	-1.3175	-2.49233	0.00027411	0.00152141	-1	8.57743	7.25993	8.90404	9.06666
1456231_at	Pla2g3	phospholipase A2, group III	237625	1.61872	3.07102	2.42657e-05	0.000813053	1	1.69433	3.23628	1.39806e-05	0.000496899	1	-1.79818	-3.4778	6.64897e-06	9.00885e-05	-1	6.4652	4.66703	6.28574	6.36136
1442129_at				0.729544	1.65812	2.4556e-05	0.000820602	0	0.761857	1.69567	1.45606e-05	0.000510455	0	-1.01832	-2.02556	3.05757e-07	9.41914e-06	-1	9.57611	8.55779	9.28734	9.31965
1435557_at	Fhod1	formin homology 2 domain containing 1	234686	-1.11651	-2.16822	2.45703e-05	0.000820602	-1	-0.437738	-1.35448	0.0415516	0.109705	0	0.623313	1.54041	0.00580656	0.0167948	0	8.5689	9.19221	8.0757	8.75447
1417639_at	Slc22a4	solute carrier family 22 (organic cation transporter), member 4	30805	2.08562	4.24458	2.45976e-05	0.000820627	1	2.22228	4.66629	1.13843e-05	0.00043901	1	-1.94778	-3.8578	5.4367e-05	0.000444163	-1	9.64161	7.69383	9.77945	9.9161
1445989_at				1.47398	2.77788	2.46381e-05	0.000821092	1	0.92465	1.89822	0.0024657	0.0144772	0	-0.979301	-1.97151	0.00154914	0.00591533	0	5.93233	4.95303	6.42701	5.87768
1439394_x_at	Cdc20	cell division cycle 20 homolog (S. cerevisiae)	107995	-1.53206	-2.89199	2.48972e-05	0.000827946	-1	-1.51707	-2.8621	2.79696e-05	0.000764096	-1	1.11705	2.16903	0.000692575	0.00312431	1	6.05666	7.17371	5.64165	5.65664
1449207_a_at	Kif20a	kinesin family member 20A	19348	-1.47596	-2.78169	2.50089e-05	0.000828793	-1	-1.26991	-2.41146	0.000135559	0.00207152	-1	0.818766	1.7639	0.00612695	0.0175379	0	9.52578	10.3445	8.86859	9.07464
1426218_at	Glcci1	glucocorticoid induced transcript 1	170772	1.17285	2.25456	2.52878e-05	0.000832048	1	1.34801	2.5456	4.48951e-06	0.000262445	1	-1.37836	-2.59972	3.35827e-06	5.40115e-05	-1	9.64387	8.26551	9.43836	9.61352
1436613_at	Coro6	coronin 6	216961	0.997577	1.99664	2.53162e-05	0.000832048	0	1.44738	2.72713	1.81597e-07	4.0741e-05	1	-1.61741	-3.06825	3.4897e-08	2.03085e-06	-1	8.56805	6.95064	7.94822	8.39802
1448881_at	Hp	haptoglobin	15439	-1.22509	-2.3377	2.5551e-05	0.000837986	-1	-0.999763	-1.99967	0.000238887	0.00297264	0	0.0455156	1.03205	0.838308	0.88285	0	13.7715	13.817	12.5919	12.8172
1422513_at	Ccnf	cyclin F	12449	-1.82924	-3.55349	2.56443e-05	0.000839268	-1	-1.79011	-3.45842	3.30717e-05	0.000845499	-1	0.959445	1.94456	0.00898649	0.0239351	0	7.10402	8.06346	6.23423	6.27335
1439148_a_at	Pfkl	phosphofructokinase, liver, B-type	18641	-1.17061	-2.25106	2.59704e-05	0.000847253	-1	-0.74144	-1.67184	0.0023671	0.0140528	0	1.00346	2.0048	0.000145795	0.000934343	1	9.35132	10.3548	9.18417	9.61334
1451148_at	Pink1	PTEN induced putative kinase 1	68943	0.833131	1.78155	2.62281e-05	0.000853863	0	1.11427	2.16486	6.05622e-07	7.83101e-05	1	-0.982524	-1.97592	3.34092e-06	5.38724e-05	0	13.3969	12.4144	13.2475	13.5287
1455337_at	Fgd4	FYVE, RhoGEF and PH domain containing 4	224014	1.19126	2.28352	2.63687e-05	0.000857535	1	0.166347	1.12221	0.447717	0.606462	0	0.0113493	1.0079	0.958356	0.973576	0	9.92678	9.93813	11.1294	10.1045
1422831_at	Fbn2	fibrillin 2	14119	-2.40169	-5.28424	2.651e-05	0.000861227	-1	-1.65013	-3.13862	0.00122875	0.00898445	-1	2.50438	5.67405	1.60398e-05	0.000173452	1	5.70268	8.20706	5.80537	6.55693
1425750_a_at	Jak3	Janus kinase 3	16453	-1.42661	-2.68813	2.66299e-05	0.000864216	-1	-1.51396	-2.85593	1.29976e-05	0.00047781	-1	1.55956	2.94764	8.98949e-06	0.000112269	1	2.22929	3.78885	2.36224	2.27489
1416484_at	Ttc3	tetratricopeptide repeat domain 3	22129	1.09765	2.14005	2.67059e-05	0.000865315	1	0.983903	1.97781	9.26213e-05	0.00160647	0	-1.22282	-2.33403	7.10538e-06	9.45372e-05	-1	9.5362	8.31338	9.41102	9.29728
1424971_at	Ccdc99	coiled-coil domain containing 99	70385	-1.37875	-2.60043	2.67197e-05	0.000865315	-1	-1.55211	-2.93246	6.22464e-06	0.000311836	-1	1.43499	2.7038	1.65457e-05	0.000177373	1	5.91992	7.35491	5.97616	5.8028
1429404_at	2010317E24Rik	RIKEN cDNA 2010317E24 gene	72080	-2.56343	-5.91112	2.67968e-05	0.000866584	-1	-2.12852	-4.37269	0.00020862	0.00273449	-1	1.40959	2.65661	0.00676302	0.0189968	1	6.21182	7.6214	5.05797	5.49288
1424214_at	Parm1	prostate androgen-regulated mucin-like protein 1	231440	-1.03771	-2.05297	2.68846e-05	0.000866584	-1	-0.384488	-1.3054	0.0543642	0.133209	0	-0.00178082	-1.00124	0.992508	0.99679	0	10.3806	10.3788	9.34113	9.99435
1420138_at	Slc19a1	solute carrier family 19 (folate transporter), member 1	20509	-1.02708	-2.03789	2.69008e-05	0.000866584	-1	-0.375723	-1.29749	0.0572032	0.137807	0	0.184992	1.13681	0.330759	0.428106	0	8.38741	8.5724	7.54532	8.19668
1424520_at	2010305A19Rik	RIKEN cDNA 2010305A19 gene	69893	-0.824467	-1.77088	2.71361e-05	0.000871507	0	-1.00354	-2.00492	2.28411e-06	0.000170812	-1	1.2317	2.34843	1.29109e-07	5.15106e-06	1	5.8042	7.03589	6.21143	6.03235
1419609_at	Ccr1	chemokine (C-C motif) receptor 1	12768	-4.94963	-30.9021	2.71992e-05	0.00087263	-1	-5.2301	-37.5334	1.40096e-05	0.000496899	-1	3.14013	8.81606	0.0024099	0.00834475	1	5.79202	8.93215	3.98252	3.70205
1449945_at	Ppargc1b	peroxisome proliferative activated receptor, gamma, coactivator 1 beta	170826	-0.985169	-1.97955	2.72772e-05	0.000873552	0	-0.498956	-1.41319	0.0115336	0.0435157	0	1.21004	2.31345	2.03596e-06	3.78723e-05	1	7.49974	8.70978	7.72461	8.21083
1457881_at	Osbpl6	oxysterol binding protein-like 6	99031	1.39646	2.63255	2.73359e-05	0.000873552	1	1.40239	2.6434	2.59991e-05	0.000728445	1	-2.03909	-4.10986	1.81878e-07	6.49475e-06	-1	7.14012	5.10103	6.4975	6.50343
1418905_at	Nubp1	nucleotide binding protein 1	26425	-1.24642	-2.37252	2.7383e-05	0.000873552	-1	-1.07505	-2.10679	0.000143226	0.00213907	-1	1.35715	2.56179	9.7333e-06	0.000118639	1	8.89731	10.2545	9.00804	9.17941
1442518_at	C030044O21Rik	RIKEN cDNA C030044O21 gene	320796	1.79893	3.47962	2.74448e-05	0.000873552	1	2.29024	4.89139	1.26241e-06	0.00011895	1	-3.40592	-10.5995	3.49638e-09	4.11589e-07	-1	7.37121	3.96529	5.76422	6.25553
1425649_at	Slc39a14	solute carrier family 39 (zinc transporter), member 14	213053	-2.09886	-4.28371	2.74537e-05	0.000873552	-1	-2.23233	-4.69892	1.30552e-05	0.000478896	-1	1.6701	3.18236	0.000326611	0.00175097	1	2.73767	4.40776	2.3089	2.17544
1418719_at	Haus8	4HAUS augmin-like complex, subunit 8	76478	-0.822986	-1.76906	2.77035e-05	0.000877927	0	-1.0047	-2.00653	2.24786e-06	0.000169741	-1	1.03871	2.05438	1.43607e-06	2.90404e-05	1	8.10462	9.14332	8.32034	8.13862
1436233_at	Btnl9	butyrophilin-like 9	237754	2.13775	4.40075	2.77046e-05	0.000877927	1	2.74336	6.69629	1.14463e-06	0.000112694	1	-3.64528	-12.5123	1.8156e-08	1.31641e-06	-1	8.4216	4.77632	6.91407	7.51969
1459391_at	Abca5	ATP-binding cassette, sub-family A (ABC1), member 5	217265	1.59206	3.01479	2.77557e-05	0.000878646	1	1.44351	2.71981	8.46937e-05	0.00151511	1	-2.18986	-4.56262	4.36536e-07	1.22349e-05	-1	8.52552	6.33565	7.92771	7.77916
1450928_at	Id4	inhibitor of DNA binding 4	15904	1.37537	2.59434	2.79294e-05	0.00087973	1	1.3732	2.59045	2.8453e-05	0.000772048	1	-1.50744	-2.84305	9.1542e-06	0.000113547	-1	12.2539	10.7465	12.1219	12.1197
1438603_x_at	Masp1	mannan-binding lectin serine peptidase 1	17174	-1.50224	-2.83283	2.79484e-05	0.00087973	-1	-0.862251	-1.81787	0.00516437	0.0242623	0	1.56152	2.95164	1.75986e-05	0.00018564	1	5.85775	7.41927	5.91703	6.55702
1422663_at	Orc1	origin recognition complex, subunit 1	18392	-3.16809	-8.98858	2.79604e-05	0.00087973	-1	-3.21315	-9.27374	2.36514e-05	0.000682395	-1	2.57989	5.97893	0.000263559	0.00147582	1	2.77835	5.35824	2.19015	2.14509
1435005_at	Cenpe	centromere protein E	229841	-1.75275	-3.37	2.8353e-05	0.00088937	-1	-1.68165	-3.20794	4.58601e-05	0.00102589	-1	1.69268	3.23256	4.25485e-05	0.000366937	1	8.35367	10.0463	8.2936	8.3647
1435548_at	Mrs2	MRS2 magnesium homeostasis factor homolog (S. cerevisiae)	380836	-1.41571	-2.66791	2.878e-05	0.000900559	-1	-1.04695	-2.06616	0.000680493	0.00594991	-1	1.75252	3.36947	1.94843e-06	3.66708e-05	1	5.93393	7.68645	6.27074	6.63949
1455132_at	Rasal3	RAS protein activator like 3	320484	-2.57262	-5.94887	2.8871e-05	0.000901965	-1	-1.90387	-3.74215	0.000677745	0.00593914	-1	4.24812	19.0025	3.12958e-08	1.89984e-06	1	4.16939	8.4175	5.84489	6.51364
1419909_at	Mphosph9	M-phase phosphoprotein 9	269702	-1.011	-2.0153	2.89891e-05	0.000904742	-1	-0.533933	-1.44787	0.00918847	0.0368825	0	0.686818	1.60973	0.00144254	0.00558402	0	8.77945	9.46626	8.45527	8.93233
1425985_s_at	Masp1	mannan-binding lectin serine peptidase 1	17174	-1.32694	-2.5087	2.93409e-05	0.000912958	-1	-0.552857	-1.46699	0.0337837	0.0945271	0	1.47496	2.77976	8.08552e-06	0.000104216	1	9.29612	10.7711	9.44414	10.2182
1428682_at	Zc3h6	zinc finger CCCH type containing 6	78751	1.39885	2.63691	2.94499e-05	0.000915431	1	1.65574	3.15084	3.62158e-06	0.00023457	1	-0.727056	-1.65526	0.0102417	0.0265276	0	7.34504	6.61798	8.01683	8.27372
1433211_at	Rptn	repetin	20129	-3.11644	-8.67245	2.97704e-05	0.00092354	-1	-3.57626	-11.9278	5.47545e-06	0.000296486	-1	3.75732	13.5228	2.8775e-06	4.84171e-05	1	2.09149	5.84882	2.73238	2.27256
1426225_at	Rbp4	retinol binding protein 4, plasma	19662	1.63378	3.10325	3.01842e-05	0.000933084	1	1.77035	3.41136	1.1457e-05	0.00044118	1	-3.03849	-8.21629	5.2682e-09	5.36525e-07	-1	9.2622	6.22372	7.85749	7.99406
1420080_a_at	Gfpt1	glutamine fructose-6-phosphate transaminase 1	14583	-0.698711	-1.62305	3.02288e-05	0.000933084	0	-1.03639	-2.05109	1.63885e-07	3.84386e-05	-1	0.974193	1.96454	3.99202e-07	1.15077e-05	0	2.72021	3.6944	2.99569	2.65801
1431506_s_at	Ppih	peptidyl prolyl isomerase H	66101	-1.07176	-2.10199	3.07408e-05	0.000943943	-1	-1.25555	-2.38759	4.34465e-06	0.000259978	-1	0.99583	1.99423	7.11413e-05	0.000545452	0	9.91058	10.9064	9.83466	9.65086
1418090_at	Plvap	plasmalemma vesicle associated protein	84094	-1.02266	-2.03166	3.11018e-05	0.00095114	-1	-0.294909	-1.22681	0.131197	0.251804	0	-0.0587938	-1.04159	0.75633	0.81854	0	10.1503	10.0915	9.0688	9.79655
1418674_at	Osmr	oncostatin M receptor	18414	-0.788235	-1.72696	3.14723e-05	0.000960931	0	-0.784535	-1.72254	3.32521e-05	0.00084801	0	1.03003	2.04206	1.03605e-06	2.3146e-05	1	10.9746	12.0046	11.2164	11.2201
1437873_at	Zfp799	zinc finger protein 799	240064	1.17889	2.26403	3.16015e-05	0.000962027	1	0.790375	1.72952	0.00171177	0.0111972	0	-1.10276	-2.14765	6.77726e-05	0.000524999	-1	7.8537	6.75094	7.92983	7.54131
1438915_at	6720401G13Rik	RIKEN cDNA 6720401G13 gene	103012	1.13275	2.19276	3.16753e-05	0.000963269	1	1.17396	2.2563	2.0739e-05	0.000625199	1	-1.98282	-3.95265	1.44547e-08	1.11666e-06	-1	10.0059	8.02312	9.15587	9.19708
1459983_at	Impa2	inositol (myo)-1(or 4)-monophosphatase 2	114663	-1.29685	-2.45691	3.17045e-05	0.000963269	-1	-0.944346	-1.92432	0.000843445	0.00690225	0	0.757736	1.69084	0.00491303	0.0147028	0	5.92696	6.6847	5.38785	5.74035
1417408_at	F3	coagulation factor III	14066	1.22945	2.34477	3.18852e-05	0.000967809	1	1.37018	2.58503	8.55309e-06	0.000366153	1	-1.47446	-2.77879	3.3323e-06	5.37613e-05	-1	10.539	9.06449	10.2939	10.4347
1431162_a_at	Enah	enabled homolog (Drosophila)	13800	-2.10956	-4.31559	3.19375e-05	0.000968447	-1	-2.22077	-4.66144	1.73196e-05	0.000562722	-1	1.99148	3.97645	6.17958e-05	0.000491446	1	4.55718	6.54866	4.43911	4.32789
1439111_at	Gm19597	predicted gene, 19597	100503222	0.848292	1.80037	3.20412e-05	0.000969013	0	1.09349	2.1339	1.27513e-06	0.00011895	1	-1.14812	-2.21625	6.50576e-07	1.64747e-05	-1	11.026	9.87792	10.7262	10.9714
1450862_at	Rad54l	RAD54 like (S. cerevisiae)	19366	-1.44625	-2.72498	3.22605e-05	0.000974425	-1	-1.60526	-3.0425	9.1147e-06	0.000380311	-1	0.968185	1.95638	0.00175807	0.00652561	0	6.09587	7.06405	5.6178	5.45879
1416707_a_at	Pmf1	polyamine-modulated factor 1	67037	-1.438	-2.70946	3.24019e-05	0.000977547	-1	-1.11559	-2.16683	0.000478399	0.0046537	-1	1.10299	2.14799	0.000532573	0.00254648	1	8.6966	9.79959	8.36159	8.68401
1460067_at	Ccr2	chemokine (C-C motif) receptor 2	12772	-3.78934	-13.8263	3.25078e-05	0.000978076	-1	-3.79053	-13.8377	3.23885e-05	0.000834783	-1	2.86047	7.26254	0.000619725	0.0028551	1	6.55615	9.41662	5.62728	5.62609
1455400_at	Ddah1	dimethylarginine dimethylaminohydrolase 1	69219	-1.85915	-3.62793	3.26375e-05	0.000980075	-1	-2.04952	-4.13969	1.00506e-05	0.000403066	-1	2.24151	4.7289	3.19047e-06	5.20152e-05	1	7.8164	10.0579	8.19876	8.00838
1420676_at	Lce1a1	late cornified envelope 1A1	67127	1.00273	2.00378	3.27573e-05	0.000982278	1	0.840665	1.79088	0.000225109	0.00286628	0	-0.498951	-1.41319	0.0140476	0.0342587	0	13.3417	12.8427	13.8455	13.6834
1426442_at	Gpm6a	glycoprotein m6a	234267	1.36003	2.5669	3.30354e-05	0.000987582	1	1.20441	2.30443	0.000128268	0.00200322	1	-1.45788	-2.74705	1.43903e-05	0.000159858	-1	8.62192	7.16403	8.52406	8.36844
1417643_at	Rsph1	radial spoke head 1 homolog (Chlamydomonas)	22092	-1.00543	-2.00755	3.3047e-05	0.000987582	-1	-0.883546	-1.8449	0.000139249	0.00210299	0	0.959497	1.94463	5.65314e-05	0.000456498	0	4.57766	5.53716	4.53173	4.65361
1438767_at	Osm	oncostatin M	18413	-3.71552	-13.1366	3.34833e-05	0.000996447	-1	-3.76309	-13.5769	2.88455e-05	0.000780644	-1	4.22809	18.7405	6.92874e-06	9.29436e-05	1	3.11678	7.34486	3.62935	3.58178
1435245_at	Gls2	glutaminase 2 (liver, mitochondrial)	216456	-1.73063	-3.31873	3.34877e-05	0.000996447	-1	-1.85613	-3.62035	1.45034e-05	0.000509097	-1	1.40338	2.6452	0.000320299	0.0017243	1	6.44481	7.84819	6.11756	5.99206
1433939_at	Aff3	AF4/FMR2 family, member 3	16764	1.39534	2.63051	3.35046e-05	0.000996447	1	1.21152	2.31581	0.000160011	0.00232471	1	-1.99559	-3.98779	3.14977e-07	9.66472e-06	-1	12.4035	10.4079	11.8033	11.6194
1417726_at	Sssca1	Sjogren's syndrome/scleroderma autoantigen 1 homolog (human)	56390	-1.0815	-2.11624	3.37964e-05	0.00100224	-1	-0.873675	-1.83232	0.000335067	0.00365399	0	0.693989	1.61775	0.002548	0.00871669	0	8.56558	9.25957	8.17806	8.38589
1438148_at	Cxcl3	chemokine (C-X-C motif) ligand 3	330122	-3.93434	-15.2881	3.40958e-05	0.00100726	-1	-4.13418	-17.5595	1.89475e-05	0.000591942	-1	4.86229	29.0867	2.41694e-06	4.24439e-05	1	2.02803	6.89032	2.95598	2.75614
1450763_x_at	Wnt3	wingless-related MMTV integration site 3	22415	1.53181	2.89149	3.43431e-05	0.00101263	1	1.68796	3.222	1.0668e-05	0.000418821	1	-1.75006	-3.36373	6.7726e-06	9.14181e-05	-1	9.40175	7.65169	9.1835	9.33965
1433893_s_at	Spag5	sperm associated antigen 5	54141	-1.40042	-2.63978	3.45046e-05	0.00101586	-1	-1.50227	-2.83287	1.49298e-05	0.000517891	-1	0.518269	1.43224	0.0593997	0.109547	0	9.17478	9.69305	8.29263	8.19079
1423714_at	Asf1b	ASF1 anti-silencing function 1 homolog B (S. cerevisiae)	66929	-1.08905	-2.12734	3.4531e-05	0.00101586	-1	-1.41871	-2.67347	1.20534e-06	0.000116982	-1	0.916834	1.88797	0.00022596	0.0013081	0	9.83069	10.7475	9.65847	9.32881
1418377_a_at	Siva1	SIVA1, apoptosis-inducing factor	30954	-1.08058	-2.11488	3.45516e-05	0.00101586	-1	-1.03164	-2.04435	5.87391e-05	0.00119975	-1	0.771339	1.70685	0.00107345	0.00440826	0	8.91815	9.68949	8.60891	8.65785
1460651_at	Lat	linker for activation of T cells	16797	-1.66275	-3.16619	3.47071e-05	0.00101755	-1	-1.23769	-2.35821	0.000741912	0.00630472	-1	3.44729	10.9078	1.12634e-09	1.7178e-07	1	5.66948	9.11677	7.45402	7.87908
1433935_at	AU020206	expressed sequence AU020206	100504230	-0.956155	-1.94013	3.50558e-05	0.0010268	0	-0.495277	-1.40959	0.0114577	0.0433021	0	1.49823	2.82496	8.81714e-08	3.93341e-06	1	9.92456	11.4228	10.4666	10.9275
1426658_x_at	Phgdh	3-phosphoglycerate dehydrogenase	236539	-0.97651	-1.9677	3.52872e-05	0.00103065	0	-0.769168	-1.70429	0.000443768	0.0044291	0	1.15447	2.22602	4.49819e-06	6.72449e-05	1	7.11591	8.27038	7.29387	7.50121
1429329_at	Cox10	COX10 homolog, cytochrome c oxidase assembly protein, heme A: farnesyltransferase (yeast)	70383	-1.00773	-2.01075	3.54615e-05	0.00103477	-1	-0.478831	-1.39361	0.0189105	0.0623589	0	0.706296	1.63161	0.00128147	0.00507667	0	3.74543	4.45172	3.44399	3.97289
1433696_at	Hn1l	hematological and neurological expressed 1-like	52009	-1.0046	-2.00638	3.59651e-05	0.00104749	-1	-1.14705	-2.21461	7.17624e-06	0.000332102	-1	0.813843	1.75789	0.000343455	0.00182234	0	9.89923	10.7131	9.70848	9.56603
1429171_a_at	Ncapg	non-SMC condensin I complex, subunit G	54392	-1.39681	-2.63318	3.60581e-05	0.0010478	-1	-1.49362	-2.81594	1.62552e-05	0.000544655	-1	1.08717	2.12457	0.000505957	0.00244642	1	10.8245	11.9116	10.5148	10.418
1455204_at	Pitpnc1	phosphatidylinositol transfer protein, cytoplasmic 1	71795	1.06706	2.09516	3.63016e-05	0.00105127	1	0.43437	1.35132	0.0407659	0.108261	0	-0.677054	-1.59887	0.00291543	0.00970764	0	10.058	9.38094	10.448	9.81531
1427151_at	Qser1	glutamine and serine rich 1	99003	0.752204	1.68436	3.63397e-05	0.00105127	0	0.701155	1.62581	8.04736e-05	0.00146384	0	-1.0387	-2.05438	5.71492e-07	1.49186e-05	-1	10.1239	9.08524	9.83745	9.7864
1428958_at	Paqr8	progestin and adipoQ receptor family member VIII	74229	1.76528	3.39939	3.64685e-05	0.00105127	1	1.74262	3.34643	4.23365e-05	0.000985517	1	-2.40281	-5.28834	7.01778e-07	1.74936e-05	-1	9.2745	6.87169	8.63697	8.61431
1424254_at	Ifitm1	interferon induced transmembrane protein 1	68713	-1.47911	-2.78776	3.66208e-05	0.0010537	-1	-1.51489	-2.85776	2.7686e-05	0.000759893	-1	2.84331	7.17667	4.06002e-09	4.58753e-07	1	9.6359	12.4792	11.0001	10.9643
1423524_at	Mastl	microtubule associated serine/threonine kinase-like	67121	-1.3311	-2.51594	3.67058e-05	0.00105389	-1	-1.71585	-3.2849	1.49442e-06	0.000131069	-1	1.82651	3.54677	6.31945e-07	1.61029e-05	1	5.79444	7.62094	6.28985	5.90509
1460372_at	Duoxa1	dual oxidase maturation factor 1	213696	-1.28781	-2.44157	3.67278e-05	0.00105389	-1	-1.0459	-2.06465	0.000341119	0.00369607	-1	0.735026	1.66443	0.00630754	0.0179569	0	8.73313	9.46816	8.18035	8.42226
1422860_at	Nts	neurotensin	67405	-2.43213	-5.39691	3.67616e-05	0.00105389	-1	-2.91407	-7.53743	3.95796e-06	0.000245568	-1	2.09994	4.28691	0.000184269	0.00111687	1	6.31523	8.41517	5.98304	5.5011
1451756_at	Flt1	FMS-like tyrosine kinase 1	14254	-1.21717	-2.3249	3.67636e-05	0.00105389	-1	-0.416739	-1.33491	0.0806088	0.176421	0	0.548699	1.46277	0.0253152	0.055167	0	8.71979	9.26849	8.05132	8.85175
1417602_at	Per2	period homolog 2 (Drosophila)	18627	1.51024	2.84857	3.69088e-05	0.00105548	1	0.555479	1.46966	0.0622002	0.14661	0	-0.467342	-1.38256	0.111744	0.182084	0	5.9762	5.50885	7.01909	6.06433
1428748_at	Zfp826	zinc finger protein 826	414758	0.939452	1.9178	3.69555e-05	0.00105548	0	0.789574	1.72856	0.000243824	0.00301349	0	-1.47503	-2.77989	9.1537e-08	4.02555e-06	-1	11.1467	9.67171	10.6112	10.4613
1448466_at	Cdca5	cell division cycle associated 5	67849	-2.24131	-4.72826	3.71081e-05	0.00105824	-1	-2.44859	-5.45881	1.28883e-05	0.000475026	-1	1.5437	2.91542	0.00153477	0.0058735	1	5.94269	7.48639	5.24508	5.0378
1416782_s_at	Praf2	PRA1 domain family 2	54637	-0.836062	-1.78517	3.72735e-05	0.00106065	0	-1.01006	-2.014	3.6081e-06	0.000234186	-1	0.19536	1.14501	0.223285	0.31372	0	10.8237	11.019	10.183	10.009
1448181_at	Klf15	Kruppel-like factor 15	66277	1.51187	2.85179	3.74893e-05	0.00106412	1	2.19394	4.57555	2.93683e-07	5.3172e-05	1	-2.26062	-4.79197	1.90723e-07	6.70998e-06	-1	9.54372	7.2831	8.79496	9.47704
1430117_a_at	Zfp64	zinc finger protein 64	22722	-1.74097	-3.34261	3.75523e-05	0.00106458	-1	-1.13949	-2.20303	0.00234222	0.0139345	-1	1.92006	3.78438	1.1614e-05	0.000135776	1	5.17061	7.09067	5.34969	5.95118
1419283_s_at	Tns1	tensin 1	21961	1.45813	2.74753	3.77015e-05	0.00106675	1	1.73254	3.32312	4.53818e-06	0.000263022	1	-1.34189	-2.53483	9.58497e-05	0.000682656	-1	7.84355	6.50166	7.95979	8.2342
1421015_s_at	Pole3	polymerase (DNA directed), epsilon 3 (p17 subunit)	59001	-0.97784	-1.96951	3.79019e-05	0.00106939	0	-1.03207	-2.04496	2.0046e-05	0.000612998	-1	1.09631	2.13808	9.5589e-06	0.000116974	1	9.12952	10.2258	9.248	9.19377
1417144_at	Tubg1	tubulin, gamma 1	103733	-1.19141	-2.28375	3.80288e-05	0.00107034	-1	-0.858728	-1.81344	0.00106018	0.00811248	0	0.258267	1.19604	0.258016	0.351624	0	8.79545	9.05372	7.86231	8.19499
1438916_x_at	6720401G13Rik	RIKEN cDNA 6720401G13 gene	103012	1.07598	2.10815	3.87853e-05	0.00109001	1	1.22501	2.33757	8.08224e-06	0.000353927	1	-2.01809	-4.05047	6.46887e-09	6.21976e-07	-1	10.2332	8.21508	9.29106	9.44009
1455834_x_at	Tacc3	transforming, acidic coiled-coil containing protein 3	21335	-1.02486	-2.03477	3.87983e-05	0.00109001	-1	-0.923891	-1.89723	0.000122971	0.00194282	0	0.719994	1.64718	0.00134182	0.00527124	0	8.96193	9.68192	8.65706	8.75803
1417506_at	Gmnn	geminin	57441	-1.09419	-2.13493	3.907e-05	0.00109437	-1	-1.27615	-2.42193	5.99828e-06	0.00030926	-1	0.964544	1.95145	0.000156834	0.000988315	0	10.4023	11.3669	10.2727	10.0907
1451329_at	Nudt22	nudix (nucleoside diphosphate linked moiety X)-type motif 22	68323	-1.16356	-2.24009	3.90949e-05	0.00109437	-1	-0.644509	-1.56321	0.00797722	0.0333795	0	1.2432	2.36723	1.7865e-05	0.000187934	1	3.51863	4.76183	3.59827	4.11732
1436993_x_at	Pfn2	profilin 2	18645	0.906324	1.87426	3.93571e-05	0.00109973	0	0.583901	1.4989	0.00273561	0.0156028	0	-1.43621	-2.70609	8.65369e-08	3.88287e-06	-1	11.956	10.5197	11.4261	11.1036
1452766_at	Tppp	tubulin polymerization promoting protein	72948	1.85921	3.62809	3.95122e-05	0.00110134	1	1.22002	2.32949	0.00237611	0.0140874	1	-1.65221	-3.14314	0.000145556	0.000933196	-1	10.3891	8.7369	10.5961	9.95691
1439817_at	2900064A13Rik	RIKEN cDNA 2900064A13 gene	73024	1.17323	2.25516	3.9529e-05	0.00110134	1	0.652897	1.57232	0.00778738	0.0327667	0	-1.17825	-2.26302	3.7625e-05	0.000334637	-1	7.16951	5.99126	7.16449	6.64415
1425464_at	Gata6	GATA binding protein 6	14465	1.25126	2.3805	3.95452e-05	0.00110134	1	1.71195	3.27603	7.20108e-07	8.47702e-05	1	-0.830597	-1.77842	0.00216969	0.00768928	0	7.21542	6.38482	7.63608	8.09677
1449005_at	Slc16a3	solute carrier family 16 (monocarboxylic acid transporters), member 3	80879	-1.63572	-3.10744	3.982e-05	0.00110659	-1	-1.18018	-2.26605	0.00108791	0.00826139	-1	1.64278	3.12268	3.78864e-05	0.000336382	1	9.81798	11.4608	9.82503	10.2806
1421734_at	Cxcr2	chemokine (C-X-C motif) receptor 2	12765	-1.94238	-3.84339	3.98225e-05	0.00110659	-1	-1.75786	-3.38196	0.000120822	0.00192556	-1	4.537	23.2152	1.94734e-10	4.71012e-08	1	4.43552	8.97252	7.03014	7.21466
1420351_at	Tnfrsf4	tumor necrosis factor receptor superfamily, member 4	22163	-1.24225	-2.36567	4.00144e-05	0.00110908	-1	-0.783578	-1.72139	0.00325053	0.0175569	0	1.51949	2.8669	3.32427e-06	5.36877e-05	1	7.70434	9.22383	7.98158	8.44025
1456545_at	Il18rap	interleukin 18 receptor accessory protein	16174	-2.47199	-5.54809	4.01231e-05	0.00110916	-1	-1.68959	-3.22566	0.00172954	0.0112682	-1	5.60894	48.8046	3.17531e-10	6.82692e-08	1	4.18232	9.79127	7.31928	8.10167
1417882_at	Slc39a3	solute carrier family 39 (zinc transporter), member 3	106947	-1.14782	-2.21579	4.0227e-05	0.00111055	-1	-0.580419	-1.49528	0.0141781	0.0506234	0	1.44227	2.71747	2.34341e-06	4.17205e-05	1	5.15508	6.59735	5.44953	6.01693
1449947_s_at	Zfhx3	zinc finger homeobox 3	11906	1.26473	2.40282	4.02574e-05	0.00111055	1	1.06947	2.09866	0.000247013	0.00302664	1	-0.744455	-1.67534	0.00538856	0.0158298	0	8.27097	7.52652	8.79124	8.59599
1449001_at	Ivd	isovaleryl coenzyme A dehydrogenase	56357	0.613891	1.53038	4.05523e-05	0.00111501	0	0.873724	1.83239	4.26582e-07	6.63668e-05	0	-1.6974	-3.24316	1.17886e-11	7.76544e-09	-1	11.504	9.80659	10.4205	10.6803
1432533_a_at	Slc35a2	solute carrier family 35 (UDP-galactose transporter), member A2	22232	-1.57109	-2.9713	4.06723e-05	0.00111732	-1	-1.66274	-3.16618	2.08781e-05	0.000627711	-1	1.22975	2.34526	0.000529146	0.00253301	1	3.05708	4.28683	2.71574	2.62409
1420067_at	Cd160	CD160 antigen	54215	-1.73766	-3.33494	4.0763e-05	0.00111739	-1	-1.8497	-3.60424	1.9521e-05	0.000601963	-1	2.75422	6.7469	9.02187e-08	3.97887e-06	1	4.71837	7.4726	5.73494	5.6229
1435312_at	Paqr7	progestin and adipoQ receptor family member VII	71904	2.3035	4.93654	4.08327e-05	0.00111775	1	3.14427	8.84134	7.73079e-07	9.02517e-05	1	-3.54835	-11.6993	1.37657e-07	5.34737e-06	-1	10.6397	7.09139	9.39489	10.2357
1421628_at	Il18r1	interleukin 18 receptor 1	16182	-1.19968	-2.29689	4.08863e-05	0.00111823	-1	-0.738517	-1.66846	0.00395045	0.0201526	0	1.8589	3.6273	1.26515e-07	5.08028e-06	1	6.06243	7.92133	6.72165	7.18281
1419706_a_at	Akap12	A kinase (PRKA) anchor protein (gravin) 12	83397	1.00326	2.00453	4.09946e-05	0.00112012	1	0.957612	1.94209	6.94676e-05	0.00133812	0	-1.15252	-2.22302	7.66777e-06	0.000100082	-1	12.1827	11.0302	12.0334	11.9878
1441434_at	Zfp788	zinc finger protein 788	67607	0.795491	1.73567	4.11443e-05	0.00112116	0	0.694225	1.61802	0.000182459	0.00252041	0	-1.11532	-2.16644	5.36611e-07	1.42605e-05	-1	7.85371	6.73839	7.53388	7.43262
1424517_at	Ccdc12	coiled-coil domain containing 12	72654	-0.724645	-1.65249	4.11624e-05	0.00112116	0	-0.473964	-1.38892	0.00250676	0.0146294	0	1.09049	2.12947	1.95435e-07	6.80804e-06	1	7.92929	9.01978	8.29514	8.54582
1426001_at	Eomes	eomesodermin homolog (Xenopus laevis)	13813	-1.65136	-3.14129	4.11918e-05	0.00112116	-1	-1.38297	-2.60804	0.000277709	0.00325924	-1	2.32344	5.00525	5.11478e-07	1.37939e-05	1	2.06992	4.39336	2.742	3.01039
1453129_a_at	Rgs12	regulator of G-protein signaling 12	71729	-0.839001	-1.78881	4.12106e-05	0.00112116	0	-0.359535	-1.28301	0.0339503	0.0948681	0	1.00205	2.00284	4.69023e-06	6.93088e-05	1	9.41546	10.4175	9.5785	10.058
1436068_at	Zbtb10	zinc finger and BTB domain containing 10	229055	1.49871	2.8259	4.18199e-05	0.00112528	1	1.2311	2.34747	0.000340658	0.00369414	1	-1.53513	-2.89815	3.16485e-05	0.000292926	-1	5.7893	4.25417	5.75288	5.48527
1444602_at	Ophn1	oligophrenin 1	94190	1.30333	2.46797	4.18264e-05	0.00112528	1	0.619884	1.53675	0.0203136	0.065696	0	-0.436444	-1.35326	0.090218	0.153115	0	8.11028	7.67383	8.97716	8.29372
1457732_at				1.25796	2.39157	4.18283e-05	0.00112528	1	1.50494	2.83813	4.66703e-06	0.000266098	1	-1.96156	-3.89484	1.18684e-07	4.87483e-06	-1	9.20586	7.2443	8.50226	8.74924
1453107_s_at				-1.53728	-2.90246	4.1994e-05	0.00112528	-1	-1.14776	-2.2157	0.000837555	0.00687088	-1	0.182408	1.13478	0.534225	0.62788	0	9.35831	9.54072	8.00344	8.39295
1430574_at	Cdkn3	cyclin-dependent kinase inhibitor 3	72391	-1.29727	-2.45764	4.2025e-05	0.00112528	-1	-1.79935	-3.48063	6.40458e-07	8.00308e-05	-1	1.47072	2.77161	9.30177e-06	0.000114871	1	8.60956	10.0803	8.78301	8.28094
1418652_at	Cxcl9	chemokine (C-X-C motif) ligand 9	17329	-2.85449	-7.2325	4.23363e-05	0.00113138	-1	-3.67913	-12.8094	1.76897e-06	0.000144887	-1	4.26857	19.2738	2.21855e-07	7.48219e-06	1	8.29962	12.5682	9.7137	8.88906
1435911_s_at	Slc2a12	solute carrier family 2 (facilitated glucose transporter), member 12	353169	2.17059	4.50208	4.2503e-05	0.00113384	1	2.41787	5.34382	1.17229e-05	0.000446957	1	-2.52171	-5.74263	6.91913e-06	9.28942e-05	-1	9.21537	6.69365	8.86425	9.11152
1453218_at	Lce1c	late cornified envelope 1C	73719	1.11404	2.16451	4.259e-05	0.00113384	1	0.982451	1.97582	0.000168856	0.00240958	0	-0.511525	-1.42556	0.0246024	0.0539098	0	12.8496	12.3381	13.4521	13.3205
1425416_s_at	Psrc1	proline/serine-rich coiled-coil 1	56742	-1.94171	-3.84161	4.25923e-05	0.00113384	-1	-1.16607	-2.24399	0.00484487	0.023241	-1	1.83377	3.56466	8.10651e-05	0.000598774	1	7.53507	9.36883	7.42712	8.20276
1459366_at	Rgmb	RGM domain family, member B	68799	1.81378	3.51563	4.26824e-05	0.00113526	1	1.21919	2.32817	0.00206933	0.0128056	1	-1.56873	-2.96644	0.000206825	0.00122224	-1	8.55406	6.98533	8.79911	8.20452
1423995_at	Kif1b	kinesin family member 1B	16561	1.10001	2.14356	4.27474e-05	0.00113533	1	1.46319	2.75717	1.16637e-06	0.000114275	1	-1.60608	-3.04423	3.16634e-07	9.69168e-06	-1	7.08584	5.47977	6.57978	6.94295
1438303_at	Tgfb2	transforming growth factor, beta 2	21808	1.4094	2.65627	4.27732e-05	0.00113533	1	1.3335	2.52014	7.97603e-05	0.00145598	1	-1.5139	-2.85582	1.84099e-05	0.000191958	-1	9.50324	7.98934	9.39874	9.32284
1418184_at	Cenpm	centromere protein M	66570	-1.55151	-2.93124	4.2795e-05	0.00113533	-1	-1.53742	-2.90275	4.75083e-05	0.00104836	-1	0.900351	1.86652	0.00616555	0.0176289	0	3.17876	4.07911	2.5276	2.54169
1435165_at	Cntn2	contactin 2	21367	-2.41417	-5.33012	4.28349e-05	0.00113542	-1	-2.41417	-5.33012	4.28349e-05	0.000989071	-1	2.40465	5.29507	4.48213e-05	0.000382593	1	2.02843	4.43308	2.01891	2.01891
1418100_at	A030009H04Rik	RIKEN cDNA A030009H04 gene	80515	1.17975	2.26538	4.29735e-05	0.00113715	1	1.39324	2.62668	5.68239e-06	0.000304372	1	-1.22609	-2.33932	2.74358e-05	0.00026233	-1	12.1724	10.9464	12.1261	12.3396
1428288_at	Klf9	Kruppel-like factor 9	16601	0.929823	1.90504	4.31981e-05	0.00114114	0	1.16995	2.25004	2.49865e-06	0.000181592	1	-1.05557	-2.07854	9.42361e-06	0.000115776	-1	11.9827	10.9271	11.857	12.0971
1425249_a_at	Tyro3	TYRO3 protein tyrosine kinase 3	22174	-1.22522	-2.3379	4.3816e-05	0.00115549	-1	-0.679238	-1.60129	0.00845821	0.0347705	0	1.40831	2.65426	8.18829e-06	0.000105147	1	6.35146	7.75977	6.53456	7.08054
1421087_at	Per3	period homolog 3 (Drosophila)	18628	1.10792	2.15535	4.40923e-05	0.0011608	1	1.10895	2.15689	4.36258e-05	0.00099753	1	0.018989	1.01325	0.928386	0.952791	0	9.89199	9.91098	11.0189	11.0199
1417235_at	Ehd3	EH-domain containing 3	57440	-1.39693	-2.63341	4.42904e-05	0.00116292	-1	-0.731012	-1.6598	0.0121726	0.045144	0	0.342356	1.26783	0.208887	0.297886	0	7.669	8.01136	6.61443	7.28035
1455224_at	Angptl1	angiopoietin-like 1	72713	3.06757	8.38362	4.45215e-05	0.00116713	1	2.50228	5.6658	0.000384604	0.00401326	1	-3.09696	-8.55612	3.98983e-05	0.000350519	-1	8.69782	5.60087	8.66844	8.10315
1450377_at	Thbs1	thrombospondin 1	21825	-1.81521	-3.5191	4.45919e-05	0.00116736	-1	-0.733245	-1.66237	0.0455325	0.117103	0	1.3442	2.5389	0.000943953	0.00397725	1	5.16328	6.50748	4.69227	5.77424
1428129_at	Lman1	lectin, mannose-binding, 1	70361	-1.25629	-2.38881	4.46057e-05	0.00116736	-1	-1.24242	-2.36594	5.06327e-05	0.00108559	-1	1.14168	2.20637	0.00012841	0.000855028	1	9.55976	10.7014	9.44515	9.45902
1456741_s_at	Gpm6a	glycoprotein m6a	234267	1.51207	2.8522	4.49339e-05	0.00117298	1	1.49884	2.82615	4.96783e-05	0.0010748	1	-1.74084	-3.3423	8.24902e-06	0.000105727	-1	9.24575	7.50491	9.01698	9.00375
1428827_at	Whsc1	Wolf-Hirschhorn syndrome candidate 1 (human)	107823	-1.71905	-3.2922	4.51691e-05	0.00117665	-1	-1.63585	-3.1077	7.88909e-05	0.00144781	-1	1.37341	2.59083	0.000475266	0.00233115	1	6.85189	8.2253	6.50625	6.58946
1456653_a_at	Mthfd1l	methylenetetrahydrofolate dehydrogenase (NADP+ dependent) 1-like	270685	-1.92464	-3.79642	4.51884e-05	0.00117665	-1	-1.75813	-3.3826	0.000122994	0.00194282	-1	1.85327	3.61319	6.92321e-05	0.000533456	1	7.40937	9.26265	7.338	7.50451
1416346_at	Timm8a1	translocase of inner mitochondrial membrane 8 homolog a1 (yeast)	30058	-1.27355	-2.41755	4.55794e-05	0.00118285	-1	-1.48542	-2.79999	7.10944e-06	0.00033099	-1	1.04524	2.06372	0.00036966	0.00192639	1	8.5495	9.59474	8.32119	8.10932
1460282_at	Trem1	triggering receptor expressed on myeloid cells 1	58217	-3.70153	-13.0098	4.59637e-05	0.00119182	-1	-3.70153	-13.0098	4.59637e-05	0.00102732	-1	3.70153	13.0098	4.59637e-05	0.000390193	1	2.01891	5.72044	2.01891	2.01891
1450496_a_at	Ska1	spindle and kinetochore associated complex subunit 1	66468	-1.69815	-3.24484	4.60629e-05	0.00119339	-1	-1.97565	-3.93305	7.42768e-06	0.000339175	-1	1.14475	2.21108	0.0021329	0.00758234	1	6.6638	7.80855	6.11041	5.8329
1425248_a_at	Tyro3	TYRO3 protein tyrosine kinase 3	22174	-0.99795	-1.99716	4.70643e-05	0.00121168	0	-0.657758	-1.57763	0.00258631	0.0149668	0	1.22539	2.33819	3.80292e-06	5.94939e-05	1	8.76718	9.99257	8.99462	9.33481
1448511_at	Ptprcap	protein tyrosine phosphatase, receptor type, C polypeptide-associated protein	19265	-1.33168	-2.51695	4.71067e-05	0.00121168	-1	-1.03886	-2.0546	0.000615253	0.00554857	-1	3.31472	9.95015	8.63662e-11	2.75659e-08	1	6.21125	9.52597	8.19429	8.48711
1419618_at	Bbox1	butyrobetaine (gamma), 2-oxoglutarate dioxygenase 1 (gamma-butyrobetaine hydroxylase)	170442	1.16943	2.24922	4.71209e-05	0.00121168	1	1.0891	2.12741	0.000103947	0.00174704	1	-0.595686	-1.51119	0.0147174	0.0356245	0	12.3556	11.7599	12.9294	12.849
1422460_at	Mad2l1	MAD2 mitotic arrest deficient-like 1 (yeast)	56150	-1.07515	-2.10694	4.71742e-05	0.00121204	-1	-1.26489	-2.40309	6.61894e-06	0.000319855	-1	1.08235	2.11749	4.37011e-05	0.000375412	1	9.67476	10.7571	9.68197	9.49222
1423539_at	Pms2	postmeiotic segregation increased 2 (S. cerevisiae)	18861	-1.04339	-2.06107	4.7629e-05	0.00121964	-1	-0.852623	-1.80578	0.000400289	0.00412274	0	0.649072	1.56816	0.00403309	0.0125479	0	7.09785	7.74693	6.70353	6.8943
1454966_at	Itga8	integrin alpha 8	241226	2.27863	4.85217	4.76408e-05	0.00121964	1	3.22305	9.33756	5.67434e-07	7.67151e-05	1	-3.81835	-14.1071	4.81615e-08	2.55322e-06	-1	7.82514	4.00679	6.28542	7.22983
1423639_at	Hrh2	histamine receptor H2	15466	-1.74327	-3.34792	4.77103e-05	0.00121964	-1	-1.7585	-3.38346	4.31874e-05	0.000993375	-1	1.84077	3.58201	2.53258e-05	0.000246181	1	2.48098	4.32175	2.57848	2.56325
1442143_at	Ano4	anoctamin 4	320091	-1.66244	-3.16551	4.77658e-05	0.00121964	-1	-1.40755	-2.65286	0.00028327	0.00328836	-1	1.7217	3.29825	3.18661e-05	0.000294324	1	2.17592	3.89762	2.23518	2.49007
1444628_at	Adam33	a disintegrin and metallopeptidase domain 33	110751	1.79311	3.46562	4.77849e-05	0.00121964	1	1.88461	3.69254	2.68042e-05	0.000742934	1	-2.13498	-4.39233	5.76251e-06	8.08004e-05	-1	8.90963	6.77465	8.56776	8.65926
1417434_at	Gpd2	glycerol phosphate dehydrogenase 2, mitochondrial	14571	-0.859338	-1.81421	4.81939e-05	0.00122704	0	-0.835261	-1.78418	6.64107e-05	0.00129885	0	1.38989	2.62059	8.30145e-08	3.76852e-06	1	11.2817	12.6716	11.8122	11.8363
1429052_at	Ptprd	protein tyrosine phosphatase, receptor type, D	19266	1.00462	2.00641	4.82784e-05	0.00122818	1	1.36072	2.56813	1.05276e-06	0.000107925	1	-1.26513	-2.40348	2.81053e-06	4.76267e-05	-1	7.51869	6.25356	7.25818	7.61428
1430983_at	Pdia6	protein disulfide isomerase associated 6	71853	-1.18584	-2.27496	4.83671e-05	0.00122943	-1	-1.63675	-3.10965	8.13411e-07	9.12699e-05	-1	2.31201	4.96573	4.75935e-09	5.01416e-07	1	4.69091	7.00291	5.81707	5.36616
1433823_at	Ptpdc1	protein tyrosine phosphatase domain containing 1	218232	1.20968	2.31286	4.84371e-05	0.0012302	1	1.11704	2.16902	0.00011691	0.0018901	1	-1.71381	-3.28025	5.66181e-07	1.48174e-05	-1	7.90965	6.19584	7.40552	7.31288
1433891_at	Lgr4	leucine-rich repeat-containing G protein-coupled receptor 4	107515	0.795376	1.73553	4.84984e-05	0.00123075	0	0.768619	1.70364	7.12805e-05	0.00136045	0	-1.36524	-2.5762	3.43069e-08	2.00783e-06	-1	11.6363	10.271	11.0664	11.0397
1432462_a_at	Med27	mediator complex subunit 27	68975	-1.33214	-2.51777	4.86606e-05	0.00123284	-1	-0.780822	-1.71811	0.00621709	0.027739	0	0.124714	1.09029	0.627559	0.71101	0	7.38056	7.50528	6.17313	6.72446
1422054_a_at	Skil	SKI-like	20482	-1.8042	-3.49236	4.88157e-05	0.00123576	-1	-1.79692	-3.47477	5.11153e-05	0.00109215	-1	3.16808	8.9885	2.44851e-08	1.59256e-06	1	3.09087	6.25895	4.45475	4.46203
1439195_at				1.13749	2.19997	4.91713e-05	0.00124172	1	1.02957	2.04141	0.00014666	0.00217253	1	-0.75995	-1.69343	0.00239695	0.00831262	0	8.1964	7.43645	8.57393	8.46601
1454011_a_at	Rpa2	replication protein A2	19891	-0.902448	-1.86924	4.97057e-05	0.00125317	0	-1.06629	-2.09404	6.64298e-06	0.000319855	-1	0.598537	1.51418	0.00255716	0.00874418	0	8.78047	9.37901	8.47656	8.31272
1440311_at	Sorbs1	sorbin and SH3 domain containing 1	20411	0.826776	1.77372	4.97919e-05	0.0012533	0	1.09348	2.13389	1.5118e-06	0.000131151	1	-1.201	-2.29899	4.11683e-07	1.16943e-05	-1	7.85541	6.65441	7.48118	7.74789
1456763_at	Mprip	myosin phosphatase Rho interacting protein	26936	0.806841	1.74938	4.98569e-05	0.00125391	0	1.2989	2.46041	9.29837e-08	2.73519e-05	1	-1.75139	-3.36683	8.91509e-10	1.44509e-07	-1	9.03935	7.28796	8.0948	8.58686
1429149_at	Gins3	GINS complex subunit 3 (Psf3 homolog)	78833	-1.23729	-2.35755	4.99055e-05	0.00125412	-1	-1.01616	-2.02253	0.00039673	0.0040987	-1	0.139298	1.10137	0.561026	0.652734	0	7.59265	7.73195	6.49466	6.71579
1439623_at				1.20606	2.30707	5.01169e-05	0.00125742	1	1.10697	2.15392	0.000128793	0.00200631	1	-1.45173	-2.73536	5.28722e-06	7.57133e-05	-1	7.02144	5.5697	6.77577	6.67667
1455087_at	D7Ertd715e	DNA segment, Chr 7, ERATO Doi 715, expressed	52480	0.876546	1.83597	5.01179e-05	0.00125742	0	0.837503	1.78695	8.34129e-05	0.00150056	0	-1.05393	-2.07618	5.36294e-06	7.65499e-05	-1	4.63419	3.58026	4.45681	4.41776
1423685_at	Aars	alanyl-tRNA synthetase	234734	-1.01433	-2.01997	5.05308e-05	0.00126113	-1	-0.738235	-1.66813	0.00120797	0.00888753	0	0.710159	1.63598	0.00167485	0.00629441	0	9.94667	10.6568	9.64249	9.91859
1438684_at	Nuak1	NUAK family, SNF1-like kinase, 1	77976	1.24223	2.36563	5.07072e-05	0.00126381	1	1.85694	3.62238	2.79911e-07	5.25214e-05	1	-1.57418	-2.97766	2.73878e-06	4.66664e-05	-1	9.83422	8.26004	9.50226	10.117
1420591_at	Gpr84	G protein-coupled receptor 84	80910	-2.62699	-6.17735	5.07401e-05	0.00126381	-1	-2.56202	-5.90534	6.72659e-05	0.00131048	-1	2.67653	6.39315	4.09739e-05	0.00035754	1	2.09095	4.76748	2.14049	2.20546
1432176_a_at	Eng	endoglin	13805	-1.42165	-2.67892	5.1109e-05	0.00126993	-1	-1.01489	-2.02075	0.00143585	0.0100031	-1	0.819744	1.76509	0.00714464	0.0198667	0	7.50232	8.32206	6.90041	7.30717
1454822_x_at	Apcdd1	adenomatosis polyposis coli down-regulated 1	494504	0.735769	1.66528	5.11853e-05	0.00127048	0	0.840294	1.79042	1.05258e-05	0.000414807	0	-1.18646	-2.27594	9.38702e-08	4.09327e-06	-1	13.3888	12.2023	12.9381	13.0426
1456727_a_at	Csnk1d	casein kinase 1, delta	104318	-0.742496	-1.67307	5.12172e-05	0.00127048	0	-0.352108	-1.27642	0.0226462	0.0708708	0	1.0656	2.09303	5.05935e-07	1.37041e-05	1	10.7328	11.7984	11.0559	11.4463
1419763_at	Nkap	NFKB activating protein	67050	-1.91065	-3.75979	5.12912e-05	0.00127048	-1	-1.82604	-3.54562	8.5048e-05	0.00151938	-1	2.38603	5.22716	3.36619e-06	5.40826e-05	1	4.61418	7.00021	5.08955	5.17417
1435553_at	Pdzd2	PDZ domain containing 2	68070	0.673538	1.59498	5.13116e-05	0.00127048	0	0.947307	1.92827	6.72989e-07	8.17088e-05	0	-1.10115	-2.14526	7.67942e-08	3.54329e-06	-1	13.087	11.9858	12.6594	12.9331
1435283_s_at	Fam189a2	family with sequence similarity 189, member A2	381217	0.894587	1.85908	5.13362e-05	0.00127048	0	1.26587	2.40472	6.18629e-07	7.91421e-05	1	-1.4478	-2.72792	8.93111e-08	3.96711e-06	-1	11.4044	9.95659	10.8512	11.2225
1417980_a_at	Insig2	insulin induced gene 2	72999	0.949465	1.93116	5.14555e-05	0.0012714	0	0.912799	1.8827	7.99417e-05	0.00145722	0	-1.34863	-2.54671	5.88262e-07	1.52662e-05	-1	10.9583	9.60962	10.5591	10.5224
1448604_at	Uck2	uridine-cytidine kinase 2	80914	-1.46655	-2.76361	5.25242e-05	0.00128957	-1	-1.04495	-2.0633	0.00148888	0.0102503	-1	1.14325	2.20877	0.000676471	0.00306935	1	10.3002	11.4435	9.9769	10.3985
1421058_at	Adh7	alcohol dehydrogenase 7 (class IV), mu or sigma polypeptide	11529	1.43786	2.70919	5.27347e-05	0.00129139	1	1.28503	2.43687	0.00017859	0.00248783	1	-0.878603	-1.83859	0.00489183	0.0146528	0	11.1521	10.2735	11.7114	11.5585
1452098_at	Chtf18	CTF18, chromosome transmission fidelity factor 18 homolog (S. cerevisiae)	214901	-2.12866	-4.37312	5.27633e-05	0.00129139	-1	-1.72394	-3.30337	0.000475501	0.00463378	-1	1.26932	2.41048	0.00580345	0.0167904	1	6.78644	8.05576	5.9271	6.33182
1420396_at	Cd160	CD160 antigen	54215	-2.07959	-4.22686	5.28049e-05	0.00129139	-1	-2.20541	-4.61207	2.67435e-05	0.00074241	-1	2.76935	6.818	1.47776e-06	2.97281e-05	1	2.102	4.87135	2.79176	2.66594
1418665_at	Impa2	inositol (myo)-1(or 4)-monophosphatase 2	114663	-1.02958	-2.04143	5.28176e-05	0.00129139	-1	-0.446859	-1.36307	0.0353908	0.097839	0	0.568229	1.4827	0.00965721	0.0253272	0	8.82504	9.39327	8.36369	8.94641
1456136_at	Kifc5b	kinesin family member C5B	16580	-1.08356	-2.11926	5.31897e-05	0.00129506	-1	-1.05338	-2.07538	7.30085e-05	0.00138235	-1	0.649239	1.56834	0.00564187	0.0164184	0	4.77359	5.42283	4.33927	4.36945
1451256_at	Gpr172b	G protein-coupled receptor 172B	52710	-1.27501	-2.42001	5.36618e-05	0.00130382	-1	-0.661817	-1.58207	0.0141014	0.0504075	0	1.17465	2.25738	0.000131938	0.000872431	1	3.61259	4.78723	3.51222	4.12542
1429543_at	6230424C14Rik	RIKEN cDNA 6230424C14 gene	67786	-1.05555	-2.07851	5.36943e-05	0.00130382	-1	-0.393108	-1.31322	0.0671317	0.154725	0	0.304355	1.23487	0.148924	0.228298	0	8.60108	8.90543	7.84988	8.51232
1441794_at				1.11696	2.1689	5.4212e-05	0.00131433	1	1.04071	2.05724	0.00011812	0.0018975	1	-0.837955	-1.78751	0.000979258	0.00409574	0	6.67035	5.83239	6.94936	6.8731
1423291_s_at	Hyou1	hypoxia up-regulated 1	12282	-1.0206	-2.02876	5.4375e-05	0.00131579	-1	-0.948891	-1.93039	0.000121199	0.00192822	0	0.231256	1.17386	0.252042	0.345061	0	8.61653	8.84779	7.82719	7.8989
1431088_at	Foxp4	forkhead box P4	74123	-1.0112	-2.01558	5.44366e-05	0.00131579	-1	-0.277381	-1.21199	0.169072	0.302622	0	0.497195	1.41147	0.0192375	0.0442065	0	8.05493	8.55212	7.54093	8.27474
1417068_a_at	Ptpn1	protein tyrosine phosphatase, non-receptor type 1	19246	-1.10211	-2.14669	5.48189e-05	0.00132381	-1	-1.31381	-2.48597	6.62269e-06	0.000319855	-1	1.84325	3.58817	5.96847e-08	2.98038e-06	1	7.9357	9.77895	8.67684	8.46514
1419518_at	Tuba8	tubulin, alpha 8	53857	-1.02525	-2.03532	5.49373e-05	0.00132466	-1	-0.45978	-1.37533	0.0308557	0.0887322	0	0.644719	1.56343	0.00408519	0.0126769	0	12.3478	12.9926	11.9673	12.5328
1440245_at	Ccdc88b	coiled-coil domain containing 88B	78317	-1.79574	-3.47193	5.50879e-05	0.00132725	-1	-1.98963	-3.97135	1.65472e-05	0.000550271	-1	4.66028	25.2862	5.41122e-11	2.09414e-08	1	3.72632	8.3866	6.59086	6.39697
1459601_at	Sik1	salt inducible kinase 1	17691	1.1238	2.1792	5.5286e-05	0.00132996	1	0.866481	1.82321	0.000779044	0.00653283	0	1.3732	2.59044	4.87025e-06	7.099e-05	1	4.85433	6.22753	7.35133	7.09401
1439493_at	Zfp827	zinc finger protein 827	622675	1.10499	2.15098	5.65877e-05	0.00135495	1	1.76894	3.40803	1.19094e-07	3.20621e-05	1	-2.36147	-5.13895	1.37376e-09	2.04479e-07	-1	7.87413	5.51266	6.61765	7.2816
1416595_at	Mrps22	mitochondrial ribosomal protein S22	64655	-0.914829	-1.88535	5.76299e-05	0.00137142	0	-1.00578	-2.00804	1.90742e-05	0.000594455	-1	0.808738	1.75168	0.000216562	0.00126557	0	10.7023	11.511	10.5962	10.5052
1448887_x_at	Fxc1	fractured callus expressed transcript 1	14356	-0.639919	-1.55824	5.769e-05	0.0013718	0	-0.766429	-1.70105	6.60774e-06	0.000319855	0	1.0368	2.05167	1.02324e-07	4.37562e-06	1	10.0406	11.0774	10.4375	10.311
1449632_s_at	Fkbp10	FK506 binding protein 10	14230	-1.52988	-2.88762	5.82445e-05	0.00137969	-1	-1.12943	-2.18773	0.00119048	0.00880699	-1	1.15243	2.22289	0.000998973	0.00416317	1	8.14748	9.29991	7.77003	8.17048
1417775_at	Polr1a	polymerase (RNA) I polypeptide A	20019	-1.09377	-2.13431	5.83225e-05	0.00137995	-1	-0.585994	-1.50107	0.012223	0.04525	0	0.457937	1.37358	0.0432121	0.0846739	0	8.03894	8.49687	7.4031	7.91088
1439091_at	Fancd2	Fanconi anemia, complementation group D2	211651	-1.09286	-2.13296	5.88449e-05	0.00138615	-1	-1.18395	-2.27197	2.32682e-05	0.000675782	-1	1.08137	2.11604	6.62447e-05	0.000516649	1	4.96362	6.04499	4.95213	4.86104
1429660_s_at	Smc2	structural maintenance of chromosomes 2	14211	-1.24444	-2.36926	5.89335e-05	0.00138646	-1	-1.62401	-3.08231	2.21134e-06	0.000167392	-1	1.02675	2.03743	0.000437175	0.00218587	1	8.30386	9.33061	8.08617	7.7066
1423602_at	Traf1	TNF receptor-associated factor 1	22029	-1.20763	-2.30959	5.91969e-05	0.00139078	-1	-0.956494	-1.94059	0.000644236	0.00572161	0	2.008	4.02224	7.20782e-08	3.38626e-06	1	7.47217	9.48017	8.27254	8.52368
1422462_at	Ube2t	ubiquitin-conjugating enzyme E2T (putative)	67196	-1.02828	-2.03959	5.92069e-05	0.00139078	-1	-1.03532	-2.04956	5.4824e-05	0.00114763	-1	0.216093	1.16158	0.290417	0.385612	0	6.97829	7.19439	6.16611	6.15907
1430193_at	Casc5	cancer susceptibility candidate 5	76464	-2.06845	-4.19435	5.92851e-05	0.00139156	-1	-2.21424	-4.64037	2.70249e-05	0.000745713	-1	1.35689	2.56132	0.00313701	0.0102606	1	6.04969	7.40658	5.33813	5.19234
1455169_at	Rab11fip2	RAB11 family interacting protein 2 (class I)	74998	0.814192	1.75831	5.95355e-05	0.00139427	0	0.850916	1.80365	3.59556e-05	0.000894126	0	-1.42377	-2.68286	3.40562e-08	2.00156e-06	-1	9.3798	7.95603	8.77022	8.80694
1452114_s_at	Igfbp5	insulin-like growth factor binding protein 5	16011	0.864829	1.82112	5.99268e-05	0.0013992	0	1.04611	2.06496	6.08043e-06	0.00030926	1	-1.04062	-2.05712	6.50235e-06	8.8608e-05	-1	12.7551	11.7145	12.5793	12.7606
1417300_at	Smpdl3b	sphingomyelin phosphodiesterase, acid-like 3B	100340	-1.61668	-3.06668	6.03763e-05	0.00140863	-1	-1.40088	-2.64063	0.000276365	0.00325313	-1	1.81339	3.51468	1.57307e-05	0.000170833	1	7.91015	9.72355	8.10687	8.32266
1437417_s_at	Gpc6	glypican 6	23888	1.28449	2.43596	6.05377e-05	0.00141133	1	1.44917	2.73051	1.46979e-05	0.000513597	1	-2.11746	-4.3393	8.43955e-08	3.81443e-06	-1	8.95789	6.84043	8.12492	8.2896
1437186_at	BC055324	cDNA sequence BC055324	381306	-1.30873	-2.47724	6.08797e-05	0.0014161	-1	-1.1866	-2.27615	0.000175513	0.00246546	-1	0.919798	1.89185	0.00185809	0.00679659	0	8.96807	9.88787	8.57914	8.70127
1449589_x_at	Nkap	NFKB activating protein	67050	-1.9003	-3.7329	6.10318e-05	0.00141858	-1	-1.59654	-3.02417	0.000378289	0.00397538	-1	2.27538	4.84126	7.06546e-06	9.42467e-05	1	4.00854	6.28392	4.38362	4.68738
1434948_at	Rab11fip2	RAB11 family interacting protein 2 (class I)	74998	0.934559	1.91131	6.14472e-05	0.00142502	0	1.21036	2.31395	2.5715e-06	0.000184718	1	-1.6802	-3.20472	2.33051e-08	1.53843e-06	-1	8.91414	7.23394	8.1685	8.4443
1422812_at	Cxcr6	chemokine (C-X-C motif) receptor 6	80901	-1.39283	-2.62594	6.33513e-05	0.00145286	-1	-1.24854	-2.37601	0.000204775	0.0027047	-1	3.27543	9.68285	3.41367e-10	7.09309e-08	1	5.82836	9.10379	7.71096	7.85525
1433587_at	Rgmb	RGM domain family, member B	68799	0.985023	1.97934	6.37681e-05	0.00146097	0	1.15753	2.23075	9.40202e-06	0.000388368	1	-1.55973	-2.94798	1.63311e-07	6.01917e-06	-1	10.9823	9.4226	10.4076	10.5801
1417100_at	Cd320	CD320 antigen	54219	-0.825909	-1.77265	6.44196e-05	0.00147082	0	-1.09635	-2.13813	1.95761e-06	0.000154794	-1	-0.0890051	-1.06364	0.586228	0.675284	0	8.58989	8.50089	7.67498	7.40454
1442811_at	Rgmb	RGM domain family, member B	68799	1.59553	3.02207	6.45002e-05	0.00147157	1	1.05844	2.08268	0.00305062	0.0167876	1	-1.95873	-3.8872	5.47225e-06	7.77516e-05	-1	9.05259	7.09386	8.68939	8.1523
1429326_at	Cenpl	centromere protein L	70454	-1.00991	-2.01378	6.49971e-05	0.00147855	-1	-1.48882	-2.80659	4.66803e-07	6.91405e-05	-1	0.991672	1.98849	7.95678e-05	0.000591599	0	6.70928	7.70096	6.69105	6.21214
1423366_at	Scd3	stearoyl-coenzyme A desaturase 3	30049	2.13128	4.38107	6.61269e-05	0.00149656	1	2.51765	5.7265	9.17224e-06	0.000381689	1	-3.67825	-12.8016	4.78575e-08	2.54535e-06	-1	12.1318	8.45354	10.5848	10.9712
1442886_at				0.949967	1.93183	6.71536e-05	0.00150986	0	0.750033	1.68183	0.000735168	0.00627141	0	-1.67239	-3.18742	3.62049e-08	2.0796e-06	-1	9.38727	7.71488	8.66485	8.46491
1417634_at	Sod3	superoxide dismutase 3, extracellular	20657	-2.54525	-5.83709	6.72138e-05	0.00150989	-1	-1.53	-2.88786	0.00636279	0.0282195	-1	2.0232	4.06484	0.000691713	0.00312133	1	6.0888	8.112	5.56675	6.582
1459911_at	Cdr2l	cerebellar degeneration-related protein 2-like	237988	-1.14348	-2.20913	6.73236e-05	0.00150989	-1	-0.747901	-1.67935	0.00349359	0.0184667	0	0.278606	1.21302	0.227815	0.318636	0	10.1016	10.3802	9.2367	9.63228
1418669_at	Hspg2	perlecan (heparan sulfate proteoglycan 2)	15530	-1.2253	-2.33804	6.73987e-05	0.00150989	-1	-0.103242	-1.07418	0.671168	0.797795	0	0.453814	1.36966	0.0737447	0.130383	0	8.117	8.57082	7.34552	8.46757
1458268_s_at	Igfbp3	insulin-like growth factor binding protein 3	16009	1.53302	2.89392	6.75241e-05	0.00151051	1	1.93389	3.82084	4.05942e-06	0.00024887	1	-1.55897	-2.94644	5.59324e-05	0.000453434	-1	11.7274	10.1684	11.7014	12.1023
1443071_at	AI839979	expressed sequence AI839979	100740	-1.6316	-3.09856	6.90166e-05	0.00153544	-1	-1.52593	-2.87972	0.000142667	0.00213732	-1	2.15709	4.46015	2.24481e-06	4.05669e-05	1	6.98199	9.13908	7.50748	7.61315
1450738_at	Kif21a	kinesin family member 21A	16564	0.886232	1.84834	6.91837e-05	0.00153544	0	0.661734	1.58198	0.00123225	0.00900021	0	-1.36472	-2.57527	2.71676e-07	8.68018e-06	-1	11.7148	10.3501	11.2363	11.0118
1419054_a_at	Ptpn21	protein tyrosine phosphatase, non-receptor type 21	24000	1.28205	2.43184	6.91842e-05	0.00153544	1	1.9343	3.82192	3.63916e-07	6.02504e-05	1	-2.0733	-4.20847	1.33531e-07	5.26639e-06	-1	10.6651	8.59185	9.8739	10.5261
1429658_a_at	Smc2	structural maintenance of chromosomes 2	14211	-1.09281	-2.13289	6.97304e-05	0.00154609	-1	-1.51374	-2.85549	1.21089e-06	0.000117153	-1	0.840896	1.79116	0.000954257	0.0040115	0	9.79002	10.6309	9.53811	9.11718
1422027_a_at	Ets1	E26 avian leukemia oncogene 1, 5' domain	23871	-1.60643	-3.04497	6.9785e-05	0.00154609	-1	-0.917563	-1.88892	0.00909382	0.0366213	0	1.66761	3.17687	4.57749e-05	0.000389327	1	6.06167	7.72927	6.12284	6.81171
1422758_at	Chst2	carbohydrate sulfotransferase 2	54371	-1.06178	-2.0875	7.01639e-05	0.00155043	-1	-0.738936	-1.66895	0.00222774	0.0134709	0	0.517213	1.43119	0.022784	0.0507221	0	3.18021	3.69742	2.63565	2.95849
1416961_at	Bub1b	budding uninhibited by benzimidazoles 1 homolog, beta (S. cerevisiae)	12236	-1.40265	-2.64386	7.05929e-05	0.00155666	-1	-1.43918	-2.71166	5.28963e-05	0.00112092	-1	1.02712	2.03796	0.00147627	0.00569608	1	9.18934	10.2165	8.81382	8.77728
1453409_at	Cgrrf1	cell growth regulator with ring finger domain 1	68755	1.06078	2.08605	7.10867e-05	0.00156644	1	1.28041	2.42907	7.58652e-06	0.00034339	1	-0.315238	-1.24422	0.146944	0.225832	0	5.25916	4.94392	6.00469	6.22433
1436260_at				1.77344	3.41868	7.12551e-05	0.00156658	1	1.98627	3.96211	1.91703e-05	0.000594703	1	-0.266578	-1.20295	0.453496	0.551723	0	6.33132	6.06474	7.83818	8.05101
1433608_at	Scfd2	Sec1 family domain containing 2	212986	-1.17014	-2.25033	7.16675e-05	0.00157141	-1	-0.825861	-1.77259	0.0020215	0.0125902	0	1.1665	2.24467	7.41827e-05	0.000562227	1	8.19709	9.36359	8.19345	8.53773
1448932_at	Krt16	keratin 16	16666	-1.69072	-3.22818	7.20568e-05	0.00157744	-1	-1.0478	-2.06738	0.00538635	0.025028	-1	3.57586	11.9245	2.29469e-09	2.99762e-07	1	11.1982	14.7741	13.0834	13.7263
1449484_at	Stc2	stanniocalcin 2	20856	-1.85203	-3.61008	7.20956e-05	0.00157744	-1	-1.35705	-2.56161	0.00149203	0.0102629	-1	1.92816	3.8057	4.57861e-05	0.000389327	1	2.50524	4.4334	2.58137	3.07635
1449091_at	Cldn8	claudin 8	54420	2.22261	4.66738	7.24224e-05	0.00158138	1	1.78984	3.45776	0.000652976	0.00577769	1	-3.33978	-10.1245	4.08744e-07	1.16796e-05	-1	9.46805	6.12826	8.35088	7.9181
1441807_s_at				1.22101	2.33111	7.24566e-05	0.00158138	1	1.10234	2.14703	0.000215363	0.0027863	1	-1.69485	-3.23744	1.23375e-06	2.59641e-05	-1	6.41556	4.72071	5.94172	5.82305
1420137_at				0.926234	1.90031	7.30814e-05	0.00159226	0	0.703939	1.62895	0.00110386	0.00835181	0	-1.84195	-3.58494	6.211e-09	6.02235e-07	-1	8.28983	6.44789	7.37412	7.15183
1429832_at	Ppih	peptidyl prolyl isomerase H	66101	-1.5225	-2.87289	7.31376e-05	0.00159236	-1	-1.11989	-2.1733	0.00146046	0.0101063	-1	2.34616	5.0847	2.88983e-07	9.05845e-06	1	5.29894	7.6451	6.1226	6.52521
1447363_s_at	Bub1b	budding uninhibited by benzimidazoles 1 homolog, beta (S. cerevisiae)	12236	-1.29735	-2.45777	7.32875e-05	0.00159451	-1	-1.21127	-2.31541	0.000153738	0.00225152	-1	0.886604	1.84882	0.00265085	0.00900093	0	9.84256	10.7292	9.43181	9.51789
1437271_at	Clcf1	cardiotrophin-like cytokine factor 1	56708	-1.34522	-2.54069	7.36046e-05	0.00159984	-1	-0.940373	-1.91902	0.00222525	0.0134687	0	1.24996	2.37834	0.000162311	0.00101354	1	7.01402	8.26397	6.91876	7.3236
1423620_at	Cenpq	centromere protein Q	83815	-1.01224	-2.01703	7.36878e-05	0.00159984	-1	-1.2353	-2.3543	6.8781e-06	0.000326104	-1	0.770134	1.70543	0.00110063	0.00449841	0	9.78256	10.5527	9.54046	9.3174
1421694_a_at	Vcan	versican	13003	-1.83829	-3.57585	7.40493e-05	0.00160544	-1	-2.11029	-4.31778	1.48234e-05	0.000515654	-1	1.20082	2.29871	0.00375804	0.0118905	1	10.2299	11.4307	9.59245	9.32044
1435693_at	Mall	mal, T cell differentiation protein-like	228576	-1.03981	-2.05595	7.41846e-05	0.00160725	-1	-0.730012	-1.65865	0.00216234	0.0131991	0	1.46586	2.76229	1.02723e-06	2.30423e-05	1	8.33423	9.80009	8.76029	9.07008
1429812_at	2610002D18Rik	RIKEN cDNA 2610002D18 gene	69885	-2.61508	-6.12655	7.43412e-05	0.00160951	-1	-2.73395	-6.65274	4.5057e-05	0.00102046	-1	1.9396	3.836	0.00137857	0.00538554	1	4.71589	6.65549	4.04042	3.92155
1438266_at				1.05206	2.07348	7.49857e-05	0.0016212	1	1.35034	2.54972	3.66282e-06	0.000235738	1	-1.46487	-2.76039	1.23355e-06	2.59641e-05	-1	9.62484	8.15997	9.21203	9.51031
1422425_at	Sprr2k	small proline-rich protein 2K	20765	-1.57939	-2.98843	7.50452e-05	0.00162135	-1	-1.95577	-3.87924	5.83075e-06	0.000305335	-1	3.69638	12.9634	4.73785e-10	9.11081e-08	1	6.77907	10.4754	8.89606	8.51967
1434501_at	Ypel4	yippee-like 4 (Drosophila)	241525	2.07846	4.22357	7.54692e-05	0.00162824	1	2.61106	6.10954	4.87839e-06	0.000273614	1	-2.78889	-6.91098	2.05084e-06	3.79883e-05	-1	7.63133	4.84244	6.92091	7.45351
1460014_at	Treml4	triggering receptor expressed on myeloid cells-like 4	224840	-2.18156	-4.53643	7.56756e-05	0.00163156	-1	-2.29126	-4.89484	4.35321e-05	0.000997364	-1	2.52749	5.76567	1.35662e-05	0.00015317	1	2.48671	5.0142	2.83265	2.72294
1425084_at	Gimap7	GTPase, IMAP family member 7	231932	-2.281	-4.86014	7.80952e-05	0.00167481	-1	-2.80863	-7.0062	6.56335e-06	0.000319855	-1	6.34523	81.3027	2.8463e-11	1.44461e-08	1	2.45496	8.80019	6.51919	5.99156
1458460_at				1.21372	2.31934	7.81144e-05	0.00167481	1	0.822935	1.769	0.00294511	0.0164201	0	-1.02862	-2.04007	0.000430801	0.00216239	-1	9.1022	8.07358	9.2873	8.89652
1423061_at	Arvcf	armadillo repeat gene deleted in velo-cardio-facial syndrome	11877	1.62388	3.08203	7.86757e-05	0.00168297	1	2.29358	4.9027	1.07684e-06	0.000109413	1	-2.28645	-4.87853	1.12382e-06	2.45023e-05	-1	6.37123	4.08478	5.70866	6.37836
1427035_at	Slc39a14	solute carrier family 39 (zinc transporter), member 14	213053	-1.72608	-3.30827	7.89861e-05	0.00168765	-1	-1.55821	-2.94488	0.000233318	0.00293044	-1	0.94245	1.92179	0.0128388	0.0318271	0	10.0644	11.0068	9.28076	9.44863
1455068_at	Psd4	pleckstrin and Sec7 domain containing 4	215632	-0.945912	-1.92641	7.92934e-05	0.00169305	0	-0.735978	-1.66553	0.000958614	0.00752884	0	1.11652	2.16823	1.13575e-05	0.000133243	1	6.52121	7.63773	6.69181	6.90175
1421819_a_at	Set	SET nuclear oncogene	56086	-1.00119	-2.00165	7.94003e-05	0.00169416	-1	-0.937365	-1.91503	0.000161096	0.00233608	0	0.577388	1.49215	0.00921198	0.0244097	0	11.3296	11.907	10.9058	10.9696
1429051_s_at	Sox11	SRY-box containing gene 11	20666	-3.32084	-9.99249	7.96831e-05	0.00169903	-1	-2.24028	-4.7249	0.00310311	0.0170009	-1	2.85008	7.21043	0.000388213	0.00200019	1	2.7292	5.57929	2.25844	3.339
1418746_at	Pnkd	paroxysmal nonkinesiogenic dyskinesia	56695	1.40474	2.64769	7.99908e-05	0.00170171	1	2.25749	4.78159	1.77195e-07	4.00434e-05	1	-2.68923	-6.44968	1.27691e-08	1.02683e-06	-1	8.48169	5.79246	7.1972	8.04995
1427371_at	Abca8a	ATP-binding cassette, sub-family A (ABC1), member 8a	217258	2.08704	4.24874	8.01321e-05	0.00170171	1	2.3683	5.16333	1.86056e-05	0.000584802	1	-2.81121	-7.01874	2.09452e-06	3.84844e-05	-1	9.89194	7.08073	9.16776	9.44903
1424278_a_at	Birc5	baculoviral IAP repeat-containing 5	11799	-1.07247	-2.10302	8.14488e-05	0.0017248	-1	-1.27729	-2.42384	1.04729e-05	0.000413826	-1	0.776411	1.71286	0.00180658	0.0066609	0	11.944	12.7204	11.6479	11.4431
1416746_at	H2afx	H2A histone family, member X	15270	-1.30725	-2.4747	8.16647e-05	0.00172806	-1	-1.24127	-2.36406	0.00014273	0.00213732	-1	0.341987	1.2675	0.204193	0.292635	0	9.0235	9.36549	8.05824	8.12422
1427307_a_at	Dab1	disabled homolog 1 (Drosophila)	13131	2.67678	6.39425	8.17955e-05	0.00172806	1	3.37399	10.3675	5.13279e-06	0.000283264	1	-2.9337	-7.64065	2.87999e-05	0.000271677	-1	7.70701	4.77331	7.45009	8.1473
1447475_at	Fam189a2	family with sequence similarity 189, member A2	381217	1.47061	2.77138	8.18136e-05	0.00172806	1	1.61667	3.06666	2.77916e-05	0.000760767	1	-1.66474	-3.17056	1.96006e-05	0.000201875	-1	7.87891	6.21418	7.68478	7.83085
1455091_at	Ppp2r3a	protein phosphatase 2, regulatory subunit B'', alpha	235542	1.07362	2.10471	8.23141e-05	0.00173482	1	0.655775	1.57546	0.0064632	0.028541	0	-0.753426	-1.68579	0.00233852	0.00815323	0	10.4002	9.64681	10.7204	10.3026
1419192_at				-2.27905	-4.85357	8.25582e-05	0.00173846	-1	-0.961805	-1.94775	0.0477138	0.121054	0	3.13541	8.78722	1.63497e-06	3.19731e-05	1	5.31894	8.45435	6.1753	7.49254
1424175_at	Tef	thyrotroph embryonic factor	21685	0.796826	1.73727	8.25992e-05	0.00173846	0	1.05251	2.07414	2.81864e-06	0.00019788	1	-0.186149	-1.13772	0.255227	0.348436	0	11.1607	10.9746	11.7714	12.0271
1429158_at	Fbxo28	F-box protein 28	67948	-1.00329	-2.00456	8.27037e-05	0.00173947	-1	-0.628147	-1.54558	0.00547236	0.025291	0	0.200075	1.14876	0.329167	0.426546	0	7.99142	8.1915	7.18821	7.56335
1459973_x_at	Dpp4	dipeptidylpeptidase 4	13482	1.36497	2.57572	8.30243e-05	0.0017421	1	0.483541	1.39817	0.0916185	0.19383	0	-1.67973	-3.20369	7.09625e-06	9.45269e-05	-1	6.91165	5.23192	6.59689	5.71546
1420565_at	Hoxa1	homeobox A1	15394	-1.06025	-2.08529	8.31573e-05	0.0017421	-1	-0.739576	-1.66969	0.00246998	0.014494	0	1.2596	2.3943	1.10586e-05	0.000130527	1	3.63002	4.88962	3.82937	4.15004
1419191_at	Hipk3	homeodomain interacting protein kinase 3	15259	-1.23502	-2.35385	8.31635e-05	0.0017421	-1	-0.549969	-1.46405	0.0378887	0.102863	0	0.658639	1.57859	0.015129	0.0364286	0	5.59489	6.25353	5.0185	5.70356
1459362_at				-2.38622	-5.22788	8.31662e-05	0.0017421	-1	-1.10123	-2.14538	0.032133	0.0912947	0	3.14875	8.86887	2.88e-06	4.8425e-05	1	2.20664	5.35539	2.96917	4.25416
1424173_at	Tmem48	transmembrane protein 48	72787	-1.81641	-3.52204	8.34164e-05	0.00174616	-1	-2.09251	-4.2649	1.62004e-05	0.000543406	-1	1.11073	2.15955	0.00646673	0.0183191	1	4.23587	5.3466	3.53019	3.25409
1416512_at	Nubp2	nucleotide binding protein 2	26426	-0.607365	-1.52347	8.35642e-05	0.00174803	0	-0.853356	-1.8067	1.24707e-06	0.000118433	0	1.09018	2.12901	3.64038e-08	2.08338e-06	1	9.50904	10.5992	9.99185	9.74586
1452457_a_at	Prkab1	protein kinase, AMP-activated, beta 1 non-catalytic subunit	19079	-1.02861	-2.04006	8.37741e-05	0.0017501	-1	-0.701716	-1.62644	0.00295018	0.0164424	0	1.19694	2.29252	1.43983e-05	0.00015989	1	6.11074	7.30768	6.27907	6.60597
1448968_at	Ubfd1	ubiquitin family domain containing 1	28018	-0.889915	-1.85307	8.43619e-05	0.00175682	0	-1.03401	-2.04771	1.47768e-05	0.000514611	-1	0.442027	1.35851	0.0224541	0.0501138	0	8.86541	9.30744	8.41752	8.27343
1452917_at	Rfc5	replication factor C (activator 1) 5	72151	-0.955115	-1.93873	8.45204e-05	0.00175682	0	-1.03867	-2.05433	3.2676e-05	0.000837809	-1	0.748607	1.68017	0.000945754	0.00398212	0	8.86848	9.61709	8.66198	8.57842
1420082_at	D2Ertd750e	DNA segment, Chr 2, ERATO Doi 750, expressed	51944	-1.20519	-2.30567	8.45848e-05	0.00175682	-1	-1.29662	-2.45652	3.70575e-05	0.000907807	-1	0.931722	1.90755	0.00106768	0.00438924	0	8.66987	9.60159	8.3964	8.30497
1436249_at	Ttll4	tubulin tyrosine ligase-like family, member 4	67534	-1.30913	-2.47792	8.45914e-05	0.00175682	-1	-1.12813	-2.18575	0.000393372	0.00407726	-1	0.892794	1.85677	0.00297757	0.00986893	0	7.05981	7.95261	6.64348	6.82448
1456547_at	Gm19313	predicted gene, 19313	100502668	0.750315	1.68216	8.50489e-05	0.00176482	0	1.20518	2.30566	1.9358e-07	4.28089e-05	1	-1.26284	-2.39967	9.76505e-08	4.21654e-06	-1	10.4075	9.14467	9.89498	10.3498
1449984_at	Cxcl2	chemokine (C-X-C motif) ligand 2	20310	-2.34996	-5.09809	8.51208e-05	0.00176513	-1	-2.89623	-7.44478	7.16483e-06	0.00033207	-1	8.05151	265.305	9.18737e-13	1.35638e-09	1	2.9585	11.01	8.66005	8.11378
1417123_at	Vav3	vav 3 oncogene	57257	-1.08172	-2.11657	8.52751e-05	0.00176517	-1	-0.71065	-1.63654	0.00395975	0.0201801	0	1.59276	3.01625	6.69943e-07	1.68083e-05	1	6.93048	8.52323	7.44151	7.81258
1423774_a_at	Prc1	protein regulator of cytokinesis 1	233406	-0.952792	-1.93561	8.5324e-05	0.00176517	0	-1.024	-2.03354	3.78586e-05	0.000919561	-1	0.536954	1.45091	0.0110727	0.0282265	0	11.1688	11.7058	10.753	10.6818
1424478_at	Bbs2	Bardet-Biedl syndrome 2 (human)	67378	0.726686	1.65483	8.53506e-05	0.00176517	0	1.09794	2.14049	4.66986e-07	6.91405e-05	1	-1.16785	-2.24677	1.9298e-07	6.76185e-06	-1	10.2115	9.04369	9.77037	10.1416
1431572_at	2310015K22Rik	RIKEN cDNA 2310015K22 gene	69565	1.04735	2.06673	8.58454e-05	0.00176972	1	1.10821	2.15577	4.55916e-05	0.00102572	1	-0.566854	-1.48129	0.0141308	0.0344372	0	4.15209	3.58524	4.63259	4.69345
1422904_at	Fmo2	flavin containing monooxygenase 2	55990	1.98037	3.94594	8.63061e-05	0.00177544	1	2.71828	6.58088	1.78071e-06	0.000145464	1	-3.1605	-8.94138	2.16675e-07	7.37983e-06	-1	8.94881	5.78831	7.76868	8.50659
1449125_at	Tnfaip8l1	tumor necrosis factor, alpha-induced protein 8-like 1	66443	-1.51955	-2.86702	8.66126e-05	0.00177617	-1	-1.2248	-2.33724	0.000750965	0.00636223	-1	0.653277	1.57274	0.0449389	0.0873882	0	6.04168	6.69495	5.1754	5.47015
1416482_at	Ttc3	tetratricopeptide repeat domain 3	22129	0.835661	1.78467	8.68008e-05	0.00177617	0	1.02421	2.03384	7.86245e-06	0.000349242	1	-1.07866	-2.11207	4.04702e-06	6.22124e-05	-1	10.334	9.2553	10.091	10.2795
1450456_at	Il21r	interleukin 21 receptor	60504	-1.307	-2.47427	8.69968e-05	0.00177843	-1	-1.51066	-2.8494	1.63037e-05	0.000545323	-1	1.61424	3.06151	7.15296e-06	9.50046e-05	1	3.78124	5.39548	4.08848	3.88482
1452881_at	Gins2	GINS complex subunit 2 (Psf2 homolog)	272551	-1.16323	-2.23958	8.71529e-05	0.00177868	-1	-1.14015	-2.20403	0.000108359	0.00179561	-1	1.17597	2.25944	7.73135e-05	0.000579992	1	8.98929	10.1653	9.00203	9.02512
1417910_at	Ccna2	cyclin A2	12428	-0.923046	-1.89611	8.75774e-05	0.00178526	0	-1.05054	-2.0713	1.97948e-05	0.000607982	-1	0.606393	1.52245	0.00403129	0.0125437	0	10.8002	11.4066	10.4835	10.3561
1448986_x_at	Dnase2a	deoxyribonuclease II alpha	13423	0.718932	1.64596	8.75906e-05	0.00178526	0	0.601452	1.51724	0.000537755	0.00504639	0	-1.31355	-2.48552	2.96795e-08	1.83409e-06	-1	10.5356	9.22207	9.94101	9.82353
1418446_at	Slc16a2	solute carrier family 16 (monocarboxylic acid transporters), member 2	20502	-1.0176	-2.02455	8.82567e-05	0.00179529	-1	-0.605888	-1.52192	0.00798429	0.0334	0	0.514728	1.42872	0.0208546	0.0472594	0	8.57718	9.09191	8.07431	8.48602
1424685_at	Exosc4	exosome component 4	109075	-1.11697	-2.1689	8.89573e-05	0.00180509	-1	-0.673201	-1.59461	0.00740726	0.0315751	0	0.520115	1.43407	0.031707	0.0660864	0	8.38245	8.90257	7.7856	8.22936
1415836_at	Aldh18a1	aldehyde dehydrogenase 18 family, member A1	56454	-1.17402	-2.2564	8.94728e-05	0.00180882	-1	-0.895243	-1.85992	0.0012567	0.00912441	0	0.29017	1.22278	0.232943	0.324072	0	10.0858	10.376	9.20194	9.48072
1421161_at	Btc	betacellulin, epidermal growth factor family member	12223	2.27065	4.82542	8.94956e-05	0.00180882	1	2.07417	4.21101	0.000232306	0.0029214	1	-4.86297	-29.1004	2.57177e-09	3.27662e-07	-1	9.84718	4.98421	7.25486	7.05837
1422240_s_at	Sprr2h	small proline-rich protein 2H	20762	-2.30074	-4.92711	8.97058e-05	0.00180882	-1	-1.63302	-3.10161	0.0022743	0.0136776	-1	3.07534	8.42886	2.66085e-06	4.56398e-05	1	10.4069	13.4822	11.1815	11.8492
1431225_at	Sox11	SRY-box containing gene 11	20666	-4.27397	-19.3461	8.97674e-05	0.00180882	-1	-2.52782	-5.76698	0.00842106	0.0346651	-1	3.50495	11.3526	0.00066087	0.0030089	1	5.43664	8.94158	4.66762	6.41377
1438762_at				0.75604	1.68885	9.01446e-05	0.00181226	0	0.792707	1.73232	5.3219e-05	0.00112392	0	-1.24847	-2.37589	1.3973e-07	5.406e-06	-1	10.8038	9.55537	10.3114	10.3481
1417848_at	Zfp704	zinc finger protein 704	170753	1.34231	2.53557	9.06605e-05	0.00182027	1	1.53701	2.90192	1.9115e-05	0.000594455	1	-2.11539	-4.33306	2.77201e-07	8.80219e-06	-1	9.43209	7.3167	8.65901	8.85371
1426503_a_at	Rnf121	ring finger protein 121	75212	-0.825207	-1.77179	9.13287e-05	0.0018254	0	-0.932414	-1.90847	2.26037e-05	0.000660823	0	1.03467	2.04864	6.24838e-06	8.60765e-05	1	8.5798	9.61447	8.78926	8.68205
1448471_a_at	Ctla2a	cytotoxic T lymphocyte-associated protein 2 alpha	13024	-1.09451	-2.1354	9.18359e-05	0.00183316	-1	-1.28668	-2.43966	1.40826e-05	0.000497714	-1	0.846012	1.79752	0.00114141	0.00462844	0	12.1121	12.9582	11.8636	11.6715
1426657_s_at				-1.39683	-2.63323	9.20757e-05	0.00183672	-1	-0.84219	-1.79277	0.00754417	0.032057	0	1.47636	2.78247	4.96714e-05	0.000414621	1	9.40207	10.8784	9.48161	10.0362
1436210_at	Gk5	glycerol kinase 5 (putative)	235533	1.03239	2.0454	9.21883e-05	0.00183672	1	1.45921	2.74958	1.2991e-06	0.000120025	1	-1.55929	-2.94709	5.18211e-07	1.39269e-05	-1	9.95069	8.3914	9.42378	9.85061
1424136_a_at				-0.901515	-1.86803	9.21918e-05	0.00183672	0	-1.12621	-2.18284	6.61984e-06	0.000319855	-1	0.911738	1.88131	8.14775e-05	0.000600177	0	11.1207	12.0325	11.131	10.9063
1426170_a_at	Cd8b1	CD8 antigen, beta chain 1	12526	-2.46408	-5.51775	9.28206e-05	0.0018445	-1	-1.97809	-3.9397	0.000824747	0.00679957	-1	2.47948	5.57697	8.67096e-05	0.000631951	1	2.03194	4.51143	2.04735	2.53334
1441094_at				2.99117	7.95118	9.2946e-05	0.00184483	1	2.50615	5.681	0.000557926	0.00517496	1	-3.85672	-14.4874	4.45268e-06	6.67901e-05	-1	9.40957	5.55285	8.54402	8.059
1420549_at	Gbp1	guanylate binding protein 1	14468	-3.4066	-10.6045	9.29698e-05	0.00184483	-1	-4.69835	-25.9623	1.8299e-06	0.000148697	-1	4.20116	18.394	7.87115e-06	0.000102325	1	3.80878	8.00994	4.60334	3.31159
1423439_at	Pck1	phosphoenolpyruvate carboxykinase 1, cytosolic	18534	3.37376	10.3658	9.30161e-05	0.00184483	1	3.2565	9.55664	0.000136042	0.00207584	1	-4.3283	-20.0886	4.75498e-06	6.98029e-05	-1	9.93109	5.60278	8.97654	8.85929
1434748_at	Ckap2	cytoskeleton associated protein 2	80986	-1.42483	-2.68483	9.34981e-05	0.00185202	-1	-1.23482	-2.35352	0.00040683	0.00416516	-1	0.991631	1.98843	0.00273298	0.0092175	0	9.07835	10.07	8.64515	8.83516
1441120_at	Gm19345	predicted gene, 19345	100502736	-1.1882	-2.27869	9.4008e-05	0.00185855	-1	-1.11371	-2.16402	0.000186876	0.00256117	-1	1.2105	2.31418	7.66589e-05	0.0005755	1	2.43147	3.64197	2.45377	2.52826
1441317_x_at	Jakmip1	janus kinase and microtubule interacting protein 1	76071	-2.19754	-4.58696	9.4068e-05	0.00185855	-1	-1.32231	-2.50066	0.00774289	0.0326727	-1	4.19727	18.3444	1.66301e-08	1.22296e-06	1	4.32314	8.52041	6.32287	7.1981
1435266_at	Scai	suppressor of cancer cell invasion	320271	0.884876	1.84661	9.42091e-05	0.00185876	0	0.697554	1.62175	0.000981259	0.00765384	0	-1.20298	-2.30215	2.25524e-06	4.06417e-05	-1	9.22968	8.0267	8.91158	8.72426
1418209_a_at	Pfn2	profilin 2	18645	0.574521	1.48918	9.42588e-05	0.00185876	0	0.634069	1.55194	3.08979e-05	0.000808952	0	-1.14578	-2.21265	8.53485e-09	7.61496e-07	-1	13.2858	12.14	12.7146	12.7741
1445345_at				1.25736	2.39057	9.59676e-05	0.00188453	1	1.10554	2.15179	0.000361952	0.00384955	1	-0.61281	-1.52924	0.026266	0.0567794	0	5.82508	5.21227	6.46962	6.3178
1422541_at	Ptprm	protein tyrosine phosphatase, receptor type, M	19274	1.08079	2.1152	9.62422e-05	0.00188705	1	0.384749	1.30563	0.0942251	0.197871	0	0.150916	1.11027	0.497453	0.593609	0	10.2578	10.4087	11.4895	10.7934
1416322_at	Prelp	proline arginine-rich end leucine-rich repeat	116847	-1.10643	-2.15312	9.69381e-05	0.00189709	-1	-0.526219	-1.44015	0.0297557	0.0863552	0	0.609891	1.52614	0.0135528	0.0332483	0	9.46925	10.0791	8.97271	9.55292
1449948_at	Ero1lb	ERO1-like beta (S. cerevisiae)	67475	1.00507	2.00704	9.71022e-05	0.00189799	1	0.689529	1.61276	0.0031328	0.0171002	0	-0.359688	-1.28315	0.09287	0.156681	0	6.59607	6.23638	7.24145	6.92591
1436294_at	Ankrd29	ankyrin repeat domain 29	225187	0.98032	1.9729	9.71483e-05	0.00189799	0	0.826821	1.77377	0.00054469	0.00509013	0	-1.28661	-2.43954	3.72702e-06	5.86622e-05	-1	8.00553	6.71892	7.69924	7.54574
1442916_at				1.00702	2.00976	9.7898e-05	0.00190504	1	0.620246	1.53714	0.0067988	0.0296174	0	-0.826209	-1.77302	0.000707844	0.00317883	0	6.89503	6.06882	7.07584	6.68906
1418591_at	Dnaja4	DnaJ (Hsp40) homolog, subfamily A, member 4	58233	0.817692	1.76258	9.82499e-05	0.00190911	0	0.755302	1.68798	0.000226313	0.00286688	0	-1.05471	-2.07729	4.7334e-06	6.95863e-05	-1	10.4991	9.4444	10.2621	10.1997
1458180_at				1.08855	2.1266	9.83683e-05	0.00190911	1	1.27541	2.42068	1.58454e-05	0.000536776	1	-0.519356	-1.43332	0.0294959	0.0623212	0	7.45065	6.9313	8.01985	8.20671
1417511_at	Lyar	Ly1 antibody reactive clone	17089	-1.07219	-2.10262	9.84153e-05	0.00190911	-1	-0.976511	-1.9677	0.000261372	0.003145	0	0.634509	1.55241	0.008856	0.0236425	0	10.0032	10.6378	9.56557	9.66125
1460405_at	Arhgef10l	Rho guanine nucleotide exchange factor (GEF) 10-like	72754	-0.889481	-1.85251	9.88199e-05	0.00191456	0	-0.458458	-1.37407	0.0199395	0.064779	0	1.56584	2.96051	6.14418e-08	3.03433e-06	1	7.52849	9.09433	8.20485	8.63587
1438602_s_at	Masp1	mannan-binding lectin serine peptidase 1	17174	-1.87516	-3.66842	0.000100048	0.00192749	-1	-0.589647	-1.50488	0.137411	0.260485	0	1.74369	3.3489	0.000215061	0.00126056	1	7.72577	9.46946	7.5943	8.87981
1428376_at	4932415G12Rik	RIKEN cDNA 4932415G12 gene	67723	1.34567	2.54148	0.000100601	0.00193574	1	1.34107	2.5334	0.000104398	0.00175204	1	-0.798614	-1.73943	0.0088105	0.0235454	0	7.53118	6.73257	8.07824	8.07364
1446055_at				1.29486	2.45354	0.00010107	0.00193993	1	0.429657	1.34691	0.118534	0.234105	0	0.259208	1.19682	0.336026	0.433474	0	2.80796	3.06717	4.36203	3.49683
1425161_a_at	Trabd	TraB domain containing	67976	-1.47189	-2.77384	0.000101416	0.00194417	-1	-1.13562	-2.19712	0.00125444	0.00911462	-1	1.72243	3.29991	1.66444e-05	0.000178116	1	6.63083	8.35326	6.88137	7.21764
1451972_at	Glcci1	glucocorticoid induced transcript 1	170772	1.11488	2.16577	0.00010228	0.00195469	1	1.30876	2.47729	1.6173e-05	0.000543192	1	-1.18373	-2.27163	5.26492e-05	0.000433423	-1	7.44918	6.26545	7.38033	7.57421
1460129_at	Slc6a2	solute carrier family 6 (neurotransmitter transporter, noradrenalin), member 2	20538	1.71059	3.27294	0.000102894	0.00196158	1	2.25071	4.75918	3.86456e-06	0.000242107	1	-2.9415	-7.6821	9.20708e-08	4.04328e-06	-1	9.47263	6.53113	8.24171	8.78184
1435293_at	Adam22	a disintegrin and metallopeptidase domain 22	11496	2.51046	5.698	0.00010309	0.00196383	1	2.64833	6.26941	5.71059e-05	0.00118024	1	-1.92563	-3.79904	0.00133559	0.00524943	-1	7.69182	5.76619	8.27665	8.41452
1449116_a_at	Dtymk	deoxythymidylate kinase	21915	-1.07424	-2.10562	0.000103139	0.00196383	-1	-1.17263	-2.25422	3.86759e-05	0.00093111	-1	0.875324	1.83442	0.000786999	0.00346396	0	8.51013	9.38546	8.31121	8.21283
1419717_at	Sema3e	sema domain, immunoglobulin domain (Ig), short basic domain, secreted, (semaphorin) 3E	20349	0.779732	1.71681	0.000103653	0.00196877	0	0.873105	1.8316	2.88867e-05	0.000781077	0	-1.41579	-2.66806	4.12341e-08	2.26349e-06	-1	8.38613	6.97034	7.75007	7.84344
1446700_at				1.37073	2.58601	0.000103904	0.00197144	1	0.685945	1.60876	0.0238481	0.0735163	0	-1.0969	-2.13895	0.000930686	0.00393742	-1	5.66109	4.56419	5.93491	5.25013
1456041_at	Snx16	sorting nexin 16	74718	1.17816	2.26289	0.000103921	0.00197144	1	0.285343	1.2187	0.248364	0.399488	0	-0.58316	-1.49813	0.0252164	0.0550149	0	7.43787	6.85471	8.03288	7.14006
1458851_at				2.18341	4.54225	0.000104058	0.00197284	1	1.44728	2.72693	0.00423877	0.0211665	1	-0.970298	-1.95924	0.0418885	0.0825663	0	7.68155	6.71126	8.89466	8.15854
1456851_at				1.50786	2.84388	0.000105921	0.00200203	1	2.05189	4.14648	2.57109e-06	0.000184718	1	-3.11714	-8.67664	5.75467e-09	5.63812e-07	-1	6.15444	3.0373	4.54516	5.08919
1425301_at	Ncam2	neural cell adhesion molecule 2	17968	1.71124	3.27443	0.0001063	0.00200551	1	1.18178	2.26857	0.00317454	0.0172517	1	-1.06567	-2.09315	0.00664454	0.0187399	-1	4.19906	3.13338	4.84463	4.31517
1442280_at	D2Ertd750e	DNA segment, Chr 2, ERATO Doi 750, expressed	51944	-0.906842	-1.87494	0.000106457	0.00200603	0	-0.93762	-1.91537	7.38994e-05	0.00138999	0	1.01315	2.01832	3.05345e-05	0.000284657	1	6.73923	7.75239	6.84554	6.81477
1448795_a_at	Tbrg4	transforming growth factor beta regulated gene 4	21379	-1.11398	-2.16443	0.00010688	0.00201156	-1	-0.488192	-1.40269	0.0449691	0.116118	0	0.89024	1.85348	0.000963951	0.00404338	0	7.66821	8.55845	7.44446	8.07025
1448833_at	Foxm1	forkhead box M1	14235	-1.47331	-2.77658	0.000107506	0.00202087	-1	-1.25014	-2.37864	0.00056192	0.00519519	-1	0.732647	1.66169	0.0250251	0.0546695	0	4.1726	4.90525	3.43194	3.65511
1450040_at	Timp2	tissue inhibitor of metalloproteinase 2	21858	1.0982	2.14087	0.000107595	0.00202132	1	1.12043	2.17411	8.65312e-05	0.00153877	1	-1.16447	-2.24151	5.63536e-05	0.000455442	-1	11.6956	10.5311	11.6293	11.6515
1441818_at				2.40253	5.28731	0.000108357	0.00202825	1	2.34397	5.077	0.000141003	0.00212121	1	-2.40191	-5.28502	0.000108661	0.000751935	-1	5.54768	3.14577	5.5483	5.48975
1448490_at	Adck4	aarF domain containing kinase 4	76889	-1.05504	-2.07777	0.000108782	0.00203311	-1	-0.279073	-1.21341	0.210838	0.355048	0	0.617132	1.53382	0.010102	0.0262315	0	8.0523	8.66943	7.61439	8.39036
1425015_at	Ephb2	Eph receptor B2	13844	-0.76297	-1.69698	0.000108949	0.00203442	0	-0.110649	-1.07971	0.486163	0.641888	0	1.1057	2.15204	1.1396e-06	2.469e-05	1	7.80151	8.90721	8.14424	8.79656
1459525_at				1.19308	2.2864	0.000109655	0.00204022	1	1.47003	2.77027	9.63949e-06	0.000393718	1	-1.1897	-2.28105	0.000113051	0.00077521	-1	4.31596	3.12626	4.31934	4.59629
1417130_s_at	Angptl4	angiopoietin-like 4	57875	-1.78496	-3.44608	0.000110926	0.00205837	-1	-0.940639	-1.91938	0.018741	0.061968	0	-0.0775136	-1.0552	0.834076	0.879537	0	10.9395	10.862	9.07706	9.92138
1460324_at	Dnmt3a	DNA methyltransferase 3A	13435	0.699113	1.62351	0.000110963	0.00205837	0	0.859528	1.81444	1.00418e-05	0.000403066	0	-1.11463	-2.16539	3.06549e-07	9.43198e-06	-1	9.40317	8.28854	8.98765	9.14807
1418762_at	Cd55	CD55 antigen	13136	1.14421	2.21026	0.000111459	0.00206633	1	0.521608	1.43555	0.0384909	0.103922	0	-0.533149	-1.44708	0.0348423	0.0711274	0	11.7977	11.2645	12.4087	11.7861
1456877_at	Duox1	dual oxidase 1	99439	-1.14215	-2.2071	0.000111891	0.00207184	-1	-1.15713	-2.23014	9.71869e-05	0.00166514	-1	1.13527	2.1966	0.000119385	0.00080865	1	5.57168	6.70695	5.5648	5.54981
1427257_at	Vcan	versican	13003	-1.44405	-2.72083	0.000112024	0.00207184	-1	-1.55855	-2.94557	4.81005e-05	0.00105491	-1	0.872187	1.83044	0.00839111	0.022628	0	10.4943	11.3665	9.92245	9.80795
1433471_at	Tcf7	transcription factor 7, T cell specific	21414	-1.3339	-2.52083	0.000112411	0.00207609	-1	-0.552459	-1.46658	0.0577746	0.138961	0	0.388174	1.30874	0.171766	0.254934	0	8.53419	8.92237	7.58847	8.36991
1449511_a_at	Ssbp4	single stranded DNA binding protein 4	76900	-0.887715	-1.85024	0.000112549	0.00207658	0	-0.78435	-1.72232	0.000398292	0.00411033	0	1.63215	3.09975	3.83068e-08	2.15632e-06	1	5.16079	6.79294	5.90523	6.00859
1420788_at	Klrg1	killer cell lectin-like receptor subfamily G, member 1	50928	-1.85487	-3.61719	0.00011326	0.00208597	-1	-1.27263	-2.41602	0.00348519	0.0184352	-1	4.87853	29.416	1.2891e-10	3.53191e-08	1	3.60442	8.48295	6.62808	7.21032
1425404_a_at	Tmem110	transmembrane protein 110	69179	-1.01794	-2.02503	0.000113674	0.00208987	-1	-0.632939	-1.55072	0.00699971	0.0302289	0	0.695855	1.61984	0.00359095	0.0114543	0	6.14988	6.84573	5.82779	6.21279
1428921_at	2810021B07Rik	RIKEN cDNA 2810021B07 gene	66308	1.0867	2.12387	0.000114227	0.0020972	1	0.584667	1.49969	0.0169736	0.0576231	0	-0.978629	-1.97059	0.000335294	0.00178899	0	7.61598	6.63735	7.72405	7.22202
1418210_at	Pfn2	profilin 2	18645	0.647038	1.56595	0.000115686	0.00211806	0	0.662039	1.58232	9.02654e-05	0.00158313	0	-1.27564	-2.42106	1.36985e-08	1.08119e-06	-1	12.1499	10.8743	11.5213	11.5363
1422972_s_at	Kat2a	K(lysine) acetyltransferase 2A	14534	-1.07225	-2.10271	0.000116223	0.00212412	-1	-0.427425	-1.34483	0.0676452	0.155582	0	0.248168	1.1877	0.274042	0.368201	0	7.86453	8.11269	7.04044	7.68527
1451532_s_at	Steap1	six transmembrane epithelial antigen of the prostate 1	70358	-4.5717	-23.7804	0.000116564	0.00212659	-1	-3.86514	-14.5721	0.000623302	0.0056032	-1	4.03744	16.4207	0.000412947	0.00209416	1	5.24972	9.28716	4.71546	5.42202
1439355_at	Plekha5	pleckstrin homology domain containing, family A member 5	109135	1.15505	2.22692	0.000117233	0.0021369	1	1.14065	2.2048	0.000134007	0.00205931	1	-0.978005	-1.96974	0.000617718	0.00284719	0	8.77491	7.79691	8.95195	8.93756
1421078_at	Tcf23	transcription factor 23	69852	-2.3108	-4.96158	0.000117507	0.0021369	-1	-1.99748	-3.99302	0.000510219	0.00486693	-1	3.3944	10.5152	1.04271e-06	2.32414e-05	1	2.85599	6.25039	3.93959	4.25291
1455527_at	Cd163l1	CD163 molecule-like 1	244233	-1.61769	-3.06883	0.00011757	0.0021369	-1	-0.582725	-1.49768	0.0962864	0.201	0	2.49419	5.63412	5.32183e-07	1.41793e-05	1	4.03178	6.52597	4.90828	5.94324
1434981_at	E130303B06Rik	RIKEN cDNA E130303B06 gene	102124	-1.84759	-3.59899	0.000117604	0.0021369	-1	-1.34587	-2.54184	0.00225736	0.0136018	-1	0.879067	1.83919	0.0323502	0.0671109	0	5.79271	6.67178	4.82419	5.3259
1423450_a_at	Hs3st1	heparan sulfate (glucosamine) 3-O-sulfotransferase 1	15476	-1.52177	-2.87142	0.000117803	0.00213911	-1	-1.00383	-2.00532	0.00476728	0.0230114	-1	0.986041	1.98074	0.00540665	0.0158709	0	7.44061	8.42665	6.90489	7.42282
1424444_a_at	1600014C10Rik	RIKEN cDNA 1600014C10 gene	72244	-0.999485	-1.99929	0.000118454	0.00214213	0	-1.00566	-2.00786	0.000110873	0.00182735	-1	1.07729	2.11007	5.18169e-05	0.000428944	1	9.64456	10.7218	9.72236	9.71619
1420450_at	Mmp10	matrix metallopeptidase 10	17384	-3.00084	-8.00464	0.000118692	0.00214519	-1	-3.3713	-10.3481	3.2213e-05	0.000831788	-1	3.22573	9.35495	5.35381e-05	0.000439083	1	2.16581	5.39154	2.3907	2.02024
1443225_at	Acvr1c	activin A receptor, type IC	269275	1.97249	3.92445	0.00011891	0.00214787	1	1.58573	3.0016	0.000998242	0.00775158	1	-3.90843	-15.0161	1.31841e-08	1.0493e-06	-1	7.15938	3.25094	5.22343	4.83667
1453226_at	Kif18b	kinesin family member 18B	70218	-2.23891	-4.72042	0.000119086	0.00214903	-1	-1.56111	-2.95081	0.00319778	0.017347	-1	1.03502	2.04915	0.0371575	0.0748616	0	5.38538	6.42041	4.18149	4.8593
1418666_at	Ptx3	pentraxin related gene	19288	-4.04859	-16.5481	0.000119113	0.00214903	-1	-4.79886	-27.8357	1.70775e-05	0.000559503	-1	4.99239	31.8316	1.05066e-05	0.000125641	1	5.28219	10.2746	6.22598	5.47571
1422796_at	Prep	prolyl endopeptidase	19072	-1.27149	-2.41411	0.000119823	0.00215933	-1	-0.802283	-1.74386	0.00655636	0.0288331	0	0.63783	1.55599	0.0251988	0.0549947	0	9.48996	10.1278	8.8563	9.3255
1456003_a_at	Slc1a4	solute carrier family 1 (glutamate/neutral amino acid transporter), member 4	55963	0.86018	1.81527	0.000120359	0.00216583	0	1.23522	2.35417	1.46518e-06	0.000130459	1	-0.866684	-1.82347	0.000111017	0.000765154	0	12.2143	11.3476	12.2078	12.5828
1426118_a_at	Tomm40	translocase of outer mitochondrial membrane 40 homolog (yeast)	53333	-1.64919	-3.13657	0.000120635	0.00216892	-1	-0.92756	-1.90206	0.013565	0.0489763	0	0.868333	1.82555	0.0196431	0.0449815	0	6.93709	7.80543	6.15624	6.87787
1428988_at	Abcc3	ATP-binding cassette, sub-family C (CFTR/MRP), member 3	76408	-1.12628	-2.18296	0.000121632	0.0021805	-1	-0.406134	-1.32513	0.096945	0.202133	0	2.63896	6.22882	9.57526e-10	1.51528e-07	1	8.43954	11.0785	9.95221	10.6724
1450616_at	Ear5	eosinophil-associated, ribonuclease A family, member 5	54159	-1.03651	-2.05125	0.000122086	0.00218407	-1	-0.733182	-1.6623	0.00291745	0.016304	0	0.977164	1.96859	0.000225748	0.00130747	0	12.4805	13.4577	12.4212	12.7245
1436204_at	1110059G02Rik	RIKEN cDNA 1110059G02 gene	68786	0.849094	1.80137	0.000122124	0.00218407	0	1.1065	2.15323	5.38044e-06	0.000292756	1	-1.53957	-2.90708	5.29864e-08	2.73866e-06	-1	11.7592	10.2196	11.0687	11.3261
1442347_at	Lrp8	low density lipoprotein receptor-related protein 8, apolipoprotein e receptor	16975	-1.24331	-2.36742	0.000122142	0.00218407	-1	-1.18732	-2.2773	0.000197987	0.00264895	-1	1.00823	2.01145	0.000945444	0.0039819	1	2.30946	3.3177	2.07438	2.13037
1427911_at	Tmem173	transmembrane protein 173	72512	-1.52401	-2.8759	0.000122184	0.00218407	-1	-1.78656	-3.44992	2.00873e-05	0.000613315	-1	1.64043	3.11759	5.43727e-05	0.000444163	1	9.81867	11.4591	9.93508	9.67253
1427180_at	Slc27a3	solute carrier family 27 (fatty acid transporter), member 3	26568	-1.35507	-2.55809	0.000122806	0.00218767	-1	-0.370218	-1.29255	0.201704	0.343799	0	0.221019	1.16556	0.439323	0.537819	0	9.64994	9.87096	8.51589	9.50074
1423877_at	Chaf1b	chromatin assembly factor 1, subunit B (p60)	110749	-2.01022	-4.02843	0.000123113	0.00218975	-1	-1.59816	-3.02758	0.00113173	0.00849825	-1	1.80111	3.48488	0.000377325	0.00195416	1	7.50268	9.30379	7.29357	7.70562
1447839_x_at	Adm	adrenomedullin	11535	-1.19165	-2.28414	0.000123122	0.00218975	-1	-1.13633	-2.19822	0.000202518	0.00269097	-1	0.520276	1.43423	0.0483002	0.0926503	0	11.3562	11.8765	10.6848	10.7402
1425895_a_at	Id1	inhibitor of DNA binding 1	15901	-1.3765	-2.59638	0.000123164	0.00218975	-1	-0.482754	-1.39741	0.106143	0.216096	0	0.610517	1.52681	0.0452028	0.0877911	0	10.0792	10.6897	9.31319	10.2069
1457645_at	C130079G13Rik	RIKEN cDNA C130079G13 gene	229333	1.02182	2.03047	0.000123209	0.00218975	1	0.917572	1.88893	0.000369481	0.00390516	0	-0.811068	-1.75451	0.00114822	0.00465299	0	11.6707	10.8596	11.8815	11.7772
1424766_at	Ercc6l	excision repair cross-complementing rodent repair deficiency complementation group 6 - like	236930	-1.50673	-2.84166	0.000124143	0.00220209	-1	-2.27291	-4.83296	7.75418e-07	9.02517e-05	-1	1.50064	2.82968	0.000129617	0.000860861	1	7.23881	8.73945	7.23272	6.46655
1439541_at	4930414L22Rik	RIKEN cDNA 4930414L22 gene	78108	0.919554	1.89153	0.000124188	0.00220209	0	1.38197	2.60624	8.17056e-07	9.13215e-05	1	-0.693937	-1.61769	0.00176845	0.0065539	0	5.70447	5.01053	5.93008	6.3925
1422028_a_at	Ets1	E26 avian leukemia oncogene 1, 5' domain	23871	-1.33661	-2.52558	0.000124553	0.00220325	-1	-0.662034	-1.58231	0.0273408	0.0811808	0	1.69345	3.23429	7.88469e-06	0.000102391	1	7.37744	9.07089	7.73428	8.40886
1420523_at	Ccdc50	coiled-coil domain containing 50	67501	1.6191	3.07183	0.000124622	0.00220325	1	0.48085	1.39557	0.167429	0.300673	0	-1.16353	-2.24004	0.00262104	0.00891924	-1	4.88155	3.71802	5.33712	4.19887
1446346_at				-1.26225	-2.3987	0.00012468	0.00220325	-1	-0.776862	-1.7134	0.00792545	0.0332167	0	0.29328	1.22542	0.27529	0.369617	0	3.98571	4.27899	3.01674	3.50213
1426165_a_at	Casp3	caspase 3	12367	-2.14186	-4.4133	0.000125195	0.00220983	-1	-1.87333	-3.66378	0.000482869	0.00468787	-1	2.21895	4.65555	8.5408e-05	0.000624335	1	3.45209	5.67104	3.52918	3.79771
1415878_at	Rrm1	ribonucleotide reductase M1	20133	-0.939553	-1.91793	0.000126006	0.0022216	0	-1.07789	-2.11095	2.68921e-05	0.000743373	-1	0.834261	1.78294	0.000420443	0.00212209	0	10.5516	11.3859	10.4463	10.308
1424203_at	Ncln	nicalin homolog (zebrafish)	103425	-1.01367	-2.01904	0.000126222	0.00222289	-1	-0.616144	-1.53277	0.0086539	0.0353789	0	0.960324	1.94575	0.000221724	0.00128864	0	6.89838	7.8587	6.84503	7.24256
1438447_at	Ddx11	DEAD/H (Asp-Glu-Ala-Asp/His) box polypeptide 11 (CHL1-like helicase homolog, S. cerevisiae)	320209	-1.1934	-2.2869	0.000127488	0.00223359	-1	-1.0014	-2.00194	0.000721245	0.00618482	-1	0.62635	1.54365	0.0205418	0.0466634	0	6.54623	7.17258	5.97919	6.17118
1432517_a_at	Nnmt	nicotinamide N-methyltransferase	18113	-0.909012	-1.87776	0.000127551	0.00223359	0	-1.10204	-2.14657	1.40275e-05	0.000496899	-1	0.328169	1.25542	0.097967	0.163648	0	10.9256	11.2537	10.3447	10.1517
1417005_at	Klc1	kinesin light chain 1	16593	-1.16334	-2.23975	0.000127967	0.00223617	-1	-0.634437	-1.55233	0.0166997	0.0569533	0	0.998027	1.99727	0.000590221	0.00274455	0	6.72815	7.72618	6.56284	7.09174
1433766_at	Naa25	N(alpha)-acetyltransferase 25, NatB auxiliary subunit	231713	-0.728615	-1.65705	0.000129535	0.00225227	0	-0.731975	-1.66091	0.000123339	0.00194603	0	1.04233	2.05955	1.6931e-06	3.2823e-05	1	10.4452	11.4876	10.759	10.7556
1450923_at	Tgfb2	transforming growth factor, beta 2	21808	1.27122	2.41366	0.00012957	0.00225227	1	1.31188	2.48264	9.23113e-05	0.00160469	1	-1.29955	-2.46152	0.000102284	0.000717751	-1	11.0286	9.72905	11.0003	11.0409
1443884_at	Thada	thyroid adenoma associated	240174	-1.0048	-2.00666	0.000129923	0.00225561	-1	-0.964545	-1.95145	0.000199207	0.00265953	0	1.08172	2.11656	5.79255e-05	0.000464966	1	5.2257	6.30742	5.30262	5.34287
1422089_at	Ncr1	natural cytotoxicity triggering receptor 1	17086	-2.36728	-5.15966	0.000130001	0.00225561	-1	-2.174	-4.51272	0.000311514	0.00349875	-1	4.99321	31.8498	5.66501e-09	5.60348e-07	1	3.78258	8.77579	6.40851	6.60179
1458373_at	Gen1	Gen homolog 1, endonuclease (Drosophila)	209334	-1.00232	-2.00322	0.000130359	0.0022597	-1	-1.00579	-2.00804	0.000125656	0.00197078	-1	0.761066	1.69474	0.00174539	0.00649798	0	2.27749	3.03856	2.03624	2.03277
1415795_at	Spin1	spindlin 1	20729	-1.0151	-2.02104	0.000133734	0.0023092	-1	-0.49852	-1.41276	0.0294529	0.0857336	0	0.772432	1.70815	0.00174895	0.00650578	0	7.7738	8.54623	7.53114	8.04771
1426665_at	Katnb1	katanin p80 (WD40-containing) subunit B 1	74187	-1.1281	-2.18571	0.000134158	0.00231524	-1	-0.401923	-1.32127	0.103647	0.212299	0	0.813817	1.75786	0.00268442	0.00908998	0	8.61995	9.43377	8.30566	9.03184
1435062_at	Srrm4	serine/arginine repetitive matrix 4	68955	0.965922	1.95331	0.000134769	0.00232189	0	1.14232	2.20735	2.0191e-05	0.000615268	1	-0.984587	-1.97875	0.000109842	0.000758412	0	6.4804	5.49581	6.46173	6.63813
1419675_at	Ngf	nerve growth factor	18049	-1.54257	-2.91312	0.000135649	0.00233446	-1	-0.798116	-1.73883	0.0228327	0.0712315	0	0.838035	1.78761	0.0175865	0.0411362	0	7.68302	8.52106	6.97849	7.72294
1415750_at	Tbl3	transducin (beta)-like 3	213773	-1.03901	-2.05482	0.000136219	0.00234037	-1	-0.704829	-1.62995	0.00430144	0.0214035	0	0.68229	1.60469	0.00541694	0.0158905	0	9.9743	10.6566	9.61758	9.95176
1419254_at	Mthfd2	methylenetetrahydrofolate dehydrogenase (NAD+ dependent), methenyltetrahydrofolate cyclohydrolase	17768	-1.28624	-2.43891	0.000136474	0.00234345	-1	-1.65975	-3.15961	6.97236e-06	0.000328082	-1	0.96896	1.95743	0.00192851	0.00700628	0	8.70535	9.67431	8.38808	8.01457
1422767_at	Bysl	bystin-like	53414	-1.01559	-2.02173	0.000136859	0.00234615	-1	-0.95132	-1.93364	0.000268435	0.00319644	0	0.383136	1.30417	0.0867152	0.148457	0	9.27368	9.65681	8.64122	8.70549
1417029_a_at	Trim2	tripartite motif-containing 2	80890	1.55692	2.94224	0.000136972	0.00234679	1	2.16897	4.49703	2.5903e-06	0.000185638	1	-3.32965	-10.0537	4.92439e-09	5.14359e-07	-1	7.77723	4.44757	6.00449	6.61655
1448585_at	Gtf2h4	general transcription factor II H, polypeptide 4	14885	-1.10068	-2.14455	0.000137674	0.00235658	-1	-0.995177	-1.99332	0.000382625	0.00400332	0	0.804165	1.74614	0.00247836	0.0085246	0	7.10345	7.90761	6.80693	6.91244
1427161_at	Cenpf	centromere protein F	108000	-1.45504	-2.74165	0.000137824	0.00235748	-1	-1.53851	-2.90495	7.53486e-05	0.00141005	-1	0.967532	1.95549	0.00500032	0.0149042	0	8.45656	9.42409	7.96905	7.88557
1425890_at	Ly6i	lymphocyte antigen 6 complex, locus I	57248	-2.78998	-6.9162	0.000138987	0.00237474	-1	-2.97702	-7.87359	6.87063e-05	0.00132781	-1	8.85223	462.153	7.54435e-12	5.83933e-09	1	2.12517	10.9774	8.18741	8.00037
1427680_a_at	Nfib	nuclear factor I/B	18028	0.661712	1.58196	0.000139695	0.00237896	0	0.746427	1.67763	3.67238e-05	0.000903792	0	-1.21059	-2.31433	5.60118e-08	2.8475e-06	-1	12.2311	11.0206	11.6823	11.767
1458425_at				1.18723	2.27716	0.000140469	0.00238951	1	0.970597	1.95965	0.000988485	0.00768932	0	-1.28586	-2.43827	5.87999e-05	0.000470886	-1	7.02002	5.73417	6.9214	6.70476
1423629_at	Dnm2	dynamin 2	13430	-0.741496	-1.67191	0.000141074	0.00239717	0	-0.496519	-1.41081	0.00483369	0.0232044	0	1.07354	2.10459	1.60551e-06	3.15398e-05	1	7.94232	9.01586	8.27436	8.51934
1416107_at	Nsg2	neuron specific gene family member 2	18197	-1.39464	-2.62922	0.000142243	0.00241059	-1	-1.08736	-2.12486	0.00150028	0.010299	-1	2.59855	6.05678	4.36599e-08	2.37142e-06	1	2.22398	4.82253	3.42789	3.73516
1451246_s_at	Aurkb	aurora kinase B	20877	-1.25325	-2.38378	0.000142254	0.00241059	-1	-1.30506	-2.47094	9.20964e-05	0.00160186	-1	0.158952	1.11648	0.551769	0.64422	0	9.10928	9.26823	8.01498	7.96317
1419270_a_at	Dut	deoxyuridine triphosphatase	110074	-1.13576	-2.19734	0.00014233	0.00241059	-1	-0.890556	-1.85389	0.00143127	0.00998467	0	0.0835438	1.05962	0.729152	0.79687	0	11.2432	11.3267	10.191	10.4362
1450089_a_at	Srprb	signal recognition particle receptor, B subunit	20818	-1.00872	-2.01212	0.000143123	0.00242135	-1	-0.926155	-1.90021	0.000341378	0.00369607	0	0.730361	1.65905	0.00273586	0.00922481	0	7.79791	8.52827	7.51955	7.60212
1421001_a_at	Car6	carbonic anhydrase 6	12353	4.42179	21.4333	0.000143467	0.00242447	1	4.46052	22.0166	0.000130811	0.00202987	1	-6.54106	-93.1224	1.22485e-06	2.59203e-05	-1	9.72762	3.18656	7.60835	7.64708
1443930_at	Zfp811	zinc finger protein 811	240063	1.38102	2.60453	0.000143702	0.00242586	1	0.298246	1.22965	0.315797	0.473512	0	0.110311	1.07946	0.707253	0.778684	0	2.25365	2.36396	3.74498	2.66221
1443932_at	Klhdc1	kelch domain containing 1	271005	1.46263	2.75611	0.000144089	0.00242756	1	1.13357	2.19401	0.0015933	0.0106955	1	-1.68053	-3.20545	3.06602e-05	0.000285657	-1	8.15847	6.47794	7.94057	7.61151
1439058_at	Sfpq	splicing factor proline/glutamine rich (polypyrimidine tract binding protein associated)	71514	1.35044	2.5499	0.0001455	0.00244105	1	1.27073	2.41284	0.000271841	0.00322637	1	-1.85204	-3.61011	3.4351e-06	5.48764e-05	-1	6.72806	4.87602	6.22646	6.14675
1437221_at	Rrm2b	ribonucleotide reductase M2 B (TP53 inducible)	382985	1.07895	2.1125	0.000145686	0.00244105	1	0.370232	1.29256	0.11876	0.234416	0	-0.550975	-1.46508	0.0252737	0.0550972	0	6.03749	5.48652	6.56547	5.85675
1435635_at	Pcmtd1	protein-L-isoaspartate (D-aspartate) O-methyltransferase domain containing 1	319263	1.10106	2.14512	0.000145942	0.00244105	1	0.756399	1.68927	0.00411584	0.0207315	0	-0.919378	-1.8913	0.00084616	0.0036604	0	8.67887	7.7595	8.86056	8.51589
1428319_at	Pdlim7	PDZ and LIM domain 7	67399	-1.64995	-3.13823	0.000146299	0.0024444	-1	-0.715715	-1.6423	0.053031	0.130886	0	-0.318904	-1.24738	0.368778	0.467408	0	9.19158	8.87268	7.22272	8.15696
1425039_at	Itgbl1	integrin, beta-like 1	223272	1.16028	2.23501	0.000146649	0.00244579	1	1.11983	2.17321	0.000211942	0.00275819	1	-1.02581	-2.0361	0.000502224	0.00243179	-1	11.2237	10.1979	11.3582	11.3178
1431330_at	3110002H16Rik	RIKEN cDNA 3110002H16 gene	76482	-0.892098	-1.85587	0.000146851	0.00244699	0	-0.875583	-1.83475	0.000178519	0.00248783	0	1.36175	2.56996	8.19831e-07	1.95849e-05	1	5.49794	6.85969	5.96759	5.98411
1441684_at	Ttc3	tetratricopeptide repeat domain 3	22129	0.867088	1.82398	0.000147772	0.00245705	0	1.01111	2.01546	2.64942e-05	0.00073808	1	-1.37665	-2.59665	4.76977e-07	1.31855e-05	-1	8.54115	7.1645	8.03159	8.17561
1451602_at	Snx6	sorting nexin 6	72183	-0.86962	-1.82718	0.000147959	0.00245884	0	-1.26338	-2.40058	1.62901e-06	0.0001378	-1	1.11478	2.16563	8.34712e-06	0.000106568	1	9.83745	10.9522	10.0826	9.68885
1438408_at	Sowahb	sosondowah ankyrin repeat domain family member B	78088	-1.12084	-2.17474	0.000148705	0.0024699	-1	-0.408498	-1.3273	0.0995362	0.206033	0	-0.209409	-1.15621	0.385345	0.484577	0	8.56221	8.3528	7.23195	7.9443
1434099_at	Ppargc1a	peroxisome proliferative activated receptor, gamma, coactivator 1 alpha	19017	1.23645	2.35617	0.000148952	0.00247269	1	0.993144	1.99052	0.00120959	0.00889311	0	-1.95676	-3.88189	5.04486e-07	1.36768e-05	-1	7.16528	5.20852	6.44497	6.20167
1431427_at	5430427M07Rik	RIKEN cDNA 5430427M07 gene	71349	2.27962	4.85551	0.000150142	0.00248844	1	1.56029	2.94913	0.00431052	0.0214349	1	-4.1189	-17.3744	7.4724e-08	3.47888e-06	-1	6.19888	2.07998	4.35961	3.64027
1454771_at	Gm2695	predicted gene 2695	100040297	-0.625828	-1.5431	0.000150269	0.00248899	0	-0.953573	-1.93666	8.66434e-07	9.51234e-05	0	1.00387	2.00537	4.21886e-07	1.19284e-05	1	4.06858	5.07245	4.44662	4.11888
1452305_s_at	Cenpn	centromere protein N	72155	-1.74623	-3.35481	0.00015065	0.00248899	-1	-2.02947	-4.08255	2.8166e-05	0.000767623	-1	1.21177	2.31622	0.00390859	0.0122542	1	6.97888	8.19065	6.44442	6.16118
1427947_at	B9d2	B9 protein domain 2	232987	-0.876235	-1.83558	0.000151129	0.00249411	0	-0.695286	-1.61921	0.00135814	0.00960658	0	1.36372	2.57347	6.50226e-07	1.64747e-05	1	6.512	7.87572	6.99949	7.18044
1426653_at	Mcm3	minichromosome maintenance deficient 3 (S. cerevisiae)	17215	-0.907473	-1.87576	0.000151549	0.00249971	0	-1.09421	-2.13496	1.82753e-05	0.000579717	-1	0.771035	1.70649	0.000747068	0.0033246	0	7.49412	8.26516	7.35768	7.17095
1422438_at	Ephx1	epoxide hydrolase 1, microsomal	13849	0.904086	1.87136	0.0001518	0.00250051	0	1.07306	2.10388	2.21338e-05	0.000650771	1	-1.45417	-2.74	4.11474e-07	1.16943e-05	-1	12.374	10.9198	11.8239	11.9929
1421260_a_at	Srm	spermidine synthase	20810	-1.00723	-2.01005	0.00015192	0.00250051	-1	-0.929219	-1.90425	0.00034437	0.00372526	0	0.458901	1.37449	0.0438579	0.0857061	0	10.8178	11.2767	10.2695	10.3475
1441801_at	Kctd4	potassium channel tetramerisation domain containing 4	67516	1.32178	2.49973	0.000152737	0.00250874	1	0.677154	1.59898	0.0254361	0.0770616	0	0.324706	1.25241	0.258404	0.351997	0	8.3066	8.63131	9.95308	9.30846
1448852_at	Rgn	regucalcin	19733	2.08413	4.24019	0.000152909	0.00250874	1	1.80139	3.48557	0.000643677	0.00571829	1	2.10167	4.29206	0.000139988	0.000907955	1	3.01598	5.11765	7.20178	6.91905
1448562_at	Upp1	uridine phosphorylase 1	22271	-4.05237	-16.5915	0.00015355	0.00251264	-1	-3.47292	-11.1033	0.000698543	0.00605965	-1	1.69417	3.23592	0.0624207	0.114136	0	7.80919	9.50337	5.451	6.03044
1435398_at	Stxbp5	syntaxin binding protein 5 (tomosyn)	78808	0.517809	1.43178	0.000154471	0.00252552	0	0.873116	1.83161	2.14368e-07	4.57712e-05	0	-1.05933	-2.08397	1.17814e-08	9.64957e-07	-1	10.81	9.75066	10.2685	10.6238
1451287_s_at	Aif1l	allograft inflammatory factor 1-like	108897	1.52014	2.86818	0.000154501	0.00252552	1	1.70634	3.26332	4.34034e-05	0.000996094	1	-0.852384	-1.80548	0.0157899	0.0376941	0	10.7469	9.89455	11.4147	11.6009
1449647_at				1.5047	2.83765	0.000154647	0.00252605	1	1.9931	3.98092	5.81027e-06	0.000305335	1	-2.03635	-4.10206	4.40608e-06	6.62517e-05	-1	7.38976	5.35341	6.85811	7.34651
1445543_at	Zmym5	zinc finger, MYM-type 5	219105	0.852284	1.80536	0.000154696	0.00252605	0	0.735136	1.66455	0.000662798	0.00583956	0	-1.02608	-2.03649	1.9063e-05	0.000197257	-1	6.93164	5.90556	6.75784	6.6407
1455901_at	Chpt1	choline phosphotransferase 1	212862	1.00849	2.0118	0.000154937	0.00252865	1	0.526212	1.44014	0.0233291	0.0723425	0	-1.48706	-2.80316	1.41356e-06	2.86787e-05	-1	7.68526	6.19821	7.20669	6.72442
1434777_at	Mycl1	v-myc myelocytomatosis viral oncogene homolog 1, lung carcinoma derived (avian)	16918	1.67999	3.20427	0.000155137	0.00253012	1	2.03167	4.08877	1.81179e-05	0.000576496	1	-2.57548	-5.96071	8.30373e-07	1.9653e-05	-1	10.0518	7.47631	9.1563	9.50797
1451542_at	Ssbp2	single-stranded DNA binding protein 2	66970	1.42939	2.69333	0.00015519	0.00253012	1	1.37826	2.59955	0.000226065	0.00286628	1	-0.731586	-1.66046	0.0257547	0.0559163	0	7.77256	7.04097	8.47036	8.41923
1420924_at	Timp2	tissue inhibitor of metalloproteinase 2	21858	1.18999	2.28151	0.000155747	0.00253652	1	1.44561	2.72378	1.72307e-05	0.000562722	1	-1.60495	-3.04185	4.64604e-06	6.88566e-05	-1	6.97926	5.37431	6.5643	6.81992
1446693_at	Frg1	FSHD region gene 1	14300	1.00866	2.01205	0.000156315	0.0025431	1	1.20356	2.30307	2.14758e-05	0.000638703	1	-0.24258	-1.18311	0.26922	0.363373	0	5.66121	5.41863	6.42729	6.62219
1458309_at				0.556738	1.47094	0.000156551	0.00254334	0	0.28091	1.21496	0.0277635	0.082011	0	-1.00774	-2.01077	7.71891e-08	3.55621e-06	-1	9.85867	8.85093	9.40767	9.13184
1434725_at	Gramd1c	GRAM domain containing 1C	207798	1.38087	2.60425	0.000156576	0.00254334	1	1.22954	2.34491	0.000498102	0.00479038	1	-0.369652	-1.29204	0.220656	0.310933	0	9.88861	9.51896	10.8998	10.7485
1428863_at	Ankrd39	ankyrin repeat domain 39	109346	-0.948746	-1.93019	0.000156675	0.0025436	0	-0.488638	-1.40312	0.025068	0.0762382	0	1.12428	2.17992	2.33826e-05	0.000232074	1	5.91653	7.04081	6.09207	6.55217
1428891_at	Parm1	prostate androgen-regulated mucin-like protein 1	231440	-1.43966	-2.71257	0.000157075	0.00254743	-1	-0.744847	-1.6758	0.0245281	0.0749053	0	0.376241	1.29796	0.231501	0.32253	0	8.33286	8.7091	7.26944	7.96425
1456960_at				1.09375	2.13428	0.000157195	0.00254805	1	0.0527186	1.03722	0.822	0.907255	0	-0.351417	-1.27581	0.145227	0.223849	0	6.85956	6.50814	7.60189	6.56086
1426022_a_at	Vill	villin-like	22351	-1.22117	-2.33136	0.00015735	0.00254921	-1	-1.35582	-2.55942	5.01826e-05	0.00107818	-1	2.22018	4.65952	7.28201e-08	3.40047e-06	1	6.45087	8.67105	7.44988	7.31523
1423401_at	Etv6	ets variant gene 6 (TEL oncogene)	14011	-1.29622	-2.45584	0.000157954	0.00255264	-1	-1.18693	-2.27667	0.000384017	0.00401129	-1	1.43728	2.7081	5.11365e-05	0.000424674	1	7.39908	8.83637	7.54015	7.64944
1425166_at	Rbl1	retinoblastoma-like 1 (p107)	19650	-1.02715	-2.03799	0.000159992	0.00257987	-1	-0.983385	-1.9771	0.000250216	0.00305228	0	1.07018	2.0997	0.000103388	0.000723532	1	8.47606	9.54624	8.51909	8.56285
1421731_a_at	Fen1	flap structure specific endonuclease 1	14156	-1.01856	-2.0259	0.000160362	0.00258047	-1	-1.01258	-2.01751	0.000170528	0.00242626	-1	0.746225	1.6774	0.00271578	0.00917411	0	9.95976	10.706	9.68742	9.6934
1437187_at	E2f7	E2F transcription factor 7	52679	-2.74268	-6.69313	0.000160744	0.00258526	-1	-2.29655	-4.91282	0.000895873	0.00718555	-1	1.08334	2.11893	0.078066	0.136362	0	6.2409	7.32424	4.58156	5.02769
1415977_at	Isyna1	myo-inositol 1-phosphate synthase A1	71780	-1.45725	-2.74585	0.000161122	0.00258842	-1	-1.10675	-2.1536	0.00205139	0.0127175	-1	0.93963	1.91804	0.00684123	0.0191696	0	8.23885	9.17847	7.72122	8.07173
1444592_at	Osgep	O-sialoglycoprotein endopeptidase	66246	1.16064	2.23557	0.000161191	0.00258842	1	1.92415	3.79513	2.90114e-07	5.31475e-05	1	-1.16754	-2.24628	0.000151487	0.000963049	-1	6.58486	5.41733	6.57797	7.34148
1428922_at	Tril	TLR4 interactor with leucine-rich repeats	66873	1.18296	2.27041	0.000161818	0.00259362	1	2.06333	4.17949	1.39749e-07	3.45523e-05	1	-2.79335	-6.93238	1.30659e-09	1.97327e-07	-1	10.8387	8.04536	9.22831	10.1087
1425394_at	BC023105	cDNA sequence BC023105	667597	-1.44355	-2.71989	0.00016185	0.00259362	-1	-2.21654	-4.64776	8.59038e-07	9.4647e-05	-1	2.63469	6.2104	7.15417e-08	3.38576e-06	1	2.23923	4.87391	3.43037	2.65738
1421171_at	Adam12	a disintegrin and metallopeptidase domain 12 (meltrin alpha)	11489	-1.74594	-3.35414	0.000162102	0.00259632	-1	-1.70198	-3.25346	0.000211011	0.00274839	-1	0.753087	1.6854	0.0564074	0.105114	0	8.64607	9.39916	7.65321	7.69718
1431810_a_at	Tmco4	transmembrane and coiled-coil domains 4	77056	-1.00599	-2.00833	0.000162279	0.00259646	-1	-0.49764	-1.4119	0.0310725	0.0891735	0	1.41707	2.67042	2.76954e-06	4.71386e-05	1	7.05874	8.4758	7.46981	7.97816
1442226_at	Sema3e	sema domain, immunoglobulin domain (Ig), short basic domain, secreted, (semaphorin) 3E	20349	1.43945	2.71217	0.000162598	0.00259929	1	1.30002	2.46232	0.000450419	0.00447672	1	-2.38478	-5.22263	2.96411e-07	9.23229e-06	-1	7.20826	4.82348	6.26293	6.1235
1434177_at	Ece1	endothelin converting enzyme 1	230857	-1.32177	-2.49973	0.000163046	0.0026011	-1	-0.424972	-1.34255	0.146295	0.272686	0	-0.198418	-1.14744	0.487664	0.584631	0	5.80726	5.60884	4.28706	5.18387
1429879_at	0610037L13Rik	RIKEN cDNA 0610037L13 gene	74098	0.781113	1.71846	0.000164237	0.00261562	0	0.229149	1.17214	0.183192	0.320594	0	-1.40078	-2.64044	9.48477e-08	4.11362e-06	-1	10.2659	8.86508	9.64619	9.09422
1417196_s_at	Wwc2	WW, C2 and coiled-coil domain containing 2	52357	0.517883	1.43185	0.000164352	0.00261611	0	0.549844	1.46393	8.66049e-05	0.0015392	0	-1.09132	-2.1307	8.14896e-09	7.42034e-07	-1	9.68258	8.59126	9.10914	9.1411
1422963_at	Sprr2i	small proline-rich protein 2I	20763	-4.1021	-17.1734	0.000165381	0.00262214	-1	-3.43528	-10.8174	0.000916795	0.00730162	-1	8.31286	317.995	1.50925e-08	1.15133e-06	1	4.80494	13.1178	9.0157	9.68252
1449988_at	Gimap1	GTPase, IMAP family member 1	16205	-1.55233	-2.93291	0.000165648	0.00262326	-1	-0.839616	-1.78957	0.0199755	0.0648821	0	2.3865	5.22886	8.7094e-07	2.0386e-05	1	3.93887	6.32537	4.77304	5.48575
1425518_at	Rapgef4	Rap guanine nucleotide exchange factor (GEF) 4	56508	1.25501	2.38669	0.000165998	0.00262688	1	1.76844	3.40685	2.83742e-06	0.000198299	1	-1.18526	-2.27405	0.000297095	0.0016251	-1	8.65442	7.46916	8.72417	9.2376
1435226_at	Rnf19b	ring finger protein 19B	75234	-0.742254	-1.67279	0.000166075	0.00262688	0	-0.661345	-1.58156	0.000522044	0.00494568	0	1.06066	2.08588	2.35779e-06	4.18562e-05	1	9.38006	10.4407	9.69847	9.77938
1456922_at	Snx29	sorting nexin 29	74478	1.03634	2.05102	0.000166943	0.00263567	1	1.29183	2.44838	1.3644e-05	0.000491184	1	-0.413295	-1.33172	0.0764443	0.134107	0	7.41418	7.00089	8.03723	8.29272
1447853_x_at	Kif13a	kinesin family member 13A	16553	0.959134	1.94414	0.000167057	0.00263613	0	0.838045	1.78763	0.000629738	0.00564141	0	-1.4418	-2.71659	1.19927e-06	2.54659e-05	-1	8.02126	6.57946	7.5386	7.41751
1435431_at	Psmg4	proteasome (prosome, macropain) assembly chaperone 4	69666	-1.06675	-2.09472	0.000167625	0.00264041	-1	-1.13872	-2.20186	8.33327e-05	0.00149999	-1	1.54957	2.9273	1.91614e-06	3.62615e-05	1	8.1771	9.72667	8.65992	8.58795
1438309_at	Acvr1c	activin A receptor, type IC	269275	1.58855	3.00748	0.000167716	0.00264041	1	1.70043	3.24999	8.08753e-05	0.0014688	1	-2.74996	-6.72699	1.64037e-07	6.0305e-06	-1	9.5149	6.76494	8.35349	8.46537
1449037_at	Crem	cAMP responsive element modulator	12916	-1.05246	-2.07407	0.000167755	0.00264041	-1	-1.45149	-2.7349	3.81321e-06	0.000240442	-1	1.16557	2.24321	5.53525e-05	0.000449912	1	7.26239	8.42795	7.37549	6.97646
1452314_at	Kif11	kinesin family member 11	16551	-2.22353	-4.67036	0.000169143	0.00265307	-1	-2.38844	-5.2359	7.85306e-05	0.00144377	-1	1.604	3.03985	0.00317934	0.01037	1	5.82409	7.42809	5.20455	5.03965
1422846_at	Rbp2	retinol binding protein 2, cellular	19660	-1.16474	-2.24192	0.000169244	0.00265307	-1	-0.953309	-1.93631	0.00114258	0.00854862	0	3.26849	9.63639	8.24492e-11	2.68612e-08	1	9.71859	12.9871	11.8223	12.0338
1452119_at	Rrp1b	ribosomal RNA processing 1 homolog B (S. cerevisiae)	72462	-1.44606	-2.72463	0.000169781	0.00265609	-1	-1.17222	-2.25359	0.0012446	0.00905586	-1	1.30741	2.47497	0.000463739	0.00228766	1	5.75713	7.06454	5.61848	5.89232
1438186_at				1.02157	2.03012	0.000170868	0.00266906	1	-0.0112525	-1.00783	0.959296	0.994302	0	-0.31267	-1.242	0.167361	0.249842	0	8.68752	8.37485	9.39642	8.3636
1417589_at	Galnt3	UDP-N-acetyl-alpha-D-galactosamine:polypeptide N-acetylgalactosaminyltransferase 3	14425	-1.05874	-2.08311	0.000172139	0.0026835	-1	-1.04966	-2.07004	0.000188214	0.00257267	-1	1.67929	3.20271	5.93677e-07	1.53681e-05	1	3.85997	5.53926	4.48052	4.4896
1423920_at	Ncaph	non-SMC condensin I complex, subunit H	215387	-1.0419	-2.05893	0.000172389	0.00268357	-1	-1.0259	-2.03623	0.00020226	0.00268869	-1	1.36573	2.57708	7.57591e-06	9.93015e-05	1	8.56341	9.92915	8.88725	8.90325
1449305_at	F10	coagulation factor X	14058	-1.86131	-3.63336	0.000172404	0.00268357	-1	-1.78931	-3.45648	0.000258075	0.00312231	-1	3.21552	9.28896	1.75655e-07	6.32359e-06	1	6.0056	9.22112	7.35982	7.43182
1416710_at	Tmem35	transmembrane protein 35	67564	1.24722	2.37383	0.000172803	0.00268827	1	1.29317	2.45065	0.000117957	0.00189712	1	-3.99228	-15.9146	9.25108e-12	6.81937e-09	-1	6.66803	2.67575	3.92297	3.96892
1449994_at	Epgn	epithelial mitogen	71920	-2.29298	-4.90067	0.000172879	0.00268827	-1	-2.18222	-4.53852	0.000286162	0.00331075	-1	2.72224	6.59897	2.5588e-05	0.000248106	1	8.80285	11.5251	9.23211	9.34286
1433596_at	Dnajc6	DnaJ (Hsp40) homolog, subfamily C, member 6	72685	1.80801	3.50158	0.000173079	0.00269003	1	1.88461	3.69254	0.000111597	0.00183583	1	-2.95685	-7.76428	3.88348e-07	1.1264e-05	-1	9.10943	6.15257	7.96058	8.03719
1419474_a_at	Ehf	ets homologous factor	13661	-1.35935	-2.56569	0.000173368	0.00269169	-1	-1.24535	-2.37076	0.000416615	0.00423315	-1	3.57737	11.937	2.48607e-10	5.65946e-08	1	8.01851	11.5959	10.2365	10.3505
1448673_at	Pvrl3	poliovirus receptor-related 3	58998	0.896225	1.86119	0.000174401	0.00270108	0	0.87307	1.83156	0.000228214	0.00288388	0	-2.61285	-6.11712	4.5662e-11	1.92003e-08	-1	10.7462	8.13332	9.02954	9.00639
1449885_at	Tmem47	transmembrane protein 47	192216	1.26477	2.40289	0.000174518	0.00270154	1	0.39982	1.31934	0.155342	0.284866	0	-1.41612	-2.66867	5.10406e-05	0.000423991	-1	6.53451	5.11839	6.38316	5.51821
1451775_s_at	Il13ra1	interleukin 13 receptor, alpha 1	16164	-1.11435	-2.16498	0.000175383	0.00271086	-1	-1.4079	-2.65351	1.2254e-05	0.000460465	-1	2.00344	4.00954	1.00298e-07	4.30887e-06	1	8.01822	10.0217	8.90731	8.61376
1448901_at	Cpxm1	carboxypeptidase X 1 (M14 family)	56264	-1.8896	-3.70533	0.000175805	0.00271309	-1	-1.50307	-2.83446	0.00150292	0.0103057	-1	2.18562	4.54923	3.54164e-05	0.000319397	1	10.152	12.3376	10.448	10.8345
1423596_at	Nek6	NIMA (never in mitosis gene a)-related expressed kinase 6	59126	-1.41633	-2.66906	0.000176031	0.00271309	-1	-1.18347	-2.27122	0.000985826	0.00767828	-1	1.23719	2.35739	0.000661216	0.00300959	1	8.22056	9.45775	8.04142	8.27428
1431011_at	Dlst	dihydrolipoamide S-succinyltransferase (E2 component of 2-oxo-glutarate complex)	78920	-0.727304	-1.65554	0.000176082	0.00271309	0	-0.795238	-1.73536	6.7318e-05	0.00131048	0	1.03244	2.04548	2.77369e-06	4.71693e-05	1	5.56275	6.59519	5.86789	5.79995
1420728_at	Krt32	keratin 32	16670	3.59814	12.1101	0.000176405	0.00271446	1	3.58646	12.0124	0.000182451	0.00252041	1	-5.1785	-36.2145	2.31592e-06	4.14217e-05	-1	8.83879	3.6603	7.25843	7.24675
1424719_a_at	Mapt	microtubule-associated protein tau	17762	-1.63227	-3.1	0.000177351	0.00272226	-1	-0.489633	-1.40409	0.17702	0.312691	0	1.15475	2.22646	0.0038048	0.0119939	1	4.36451	5.51926	3.88699	5.02962
1434482_at	D4Ertd22e	DNA segment, Chr 4, ERATO Doi 22, expressed	213491	-1.03546	-2.04977	0.000177899	0.00272674	-1	-1.0728	-2.10351	0.000122524	0.00194231	-1	0.96127	1.94702	0.000375438	0.0019471	0	8.95342	9.91469	8.87923	8.84189
1444511_at	Slc41a1	solute carrier family 41, member 1	98396	-1.08449	-2.12063	0.000177972	0.00272674	-1	-0.512603	-1.42662	0.039908	0.106604	0	0.496278	1.41057	0.0459234	0.0889117	0	6.63395	7.13022	6.04573	6.61762
1431688_at	LOC73899	uncharacterized LOC73899	73899	-2.24123	-4.72799	0.000177995	0.00272674	-1	-1.53754	-2.90299	0.00476551	0.0230085	-1	3.25318	9.53465	2.09115e-06	3.84683e-05	1	5.45992	8.7131	6.47187	7.17556
1427019_at	Ptprz1	protein tyrosine phosphatase, receptor type Z, polypeptide 1	19283	-1.53369	-2.89525	0.000178572	0.00273232	-1	-1.47142	-2.77294	0.000272392	0.0032299	-1	3.25195	9.5265	8.38077e-09	7.53493e-07	1	4.10184	7.35379	5.8201	5.88237
1422016_a_at	Cenph	centromere protein H	26886	-1.08419	-2.12019	0.000179112	0.00273335	-1	-1.34616	-2.54235	1.55526e-05	0.000530879	-1	0.896246	1.86122	0.00109903	0.00449364	0	8.93255	9.8288	8.74461	8.48263
1448665_at	Dmd	dystrophin, muscular dystrophy	13405	0.954727	1.93821	0.000179591	0.00273899	0	1.02107	2.02942	8.77811e-05	0.00155133	1	-1.835	-3.56771	3.82475e-08	2.15632e-06	-1	10.2871	8.45214	9.40687	9.47321
1423522_at				-1.02349	-2.03283	0.000180219	0.00274586	-1	-0.971936	-1.96147	0.000304287	0.00345	0	0.888659	1.85145	0.000713443	0.00319887	0	10.1044	10.9931	9.9696	10.0212
1425216_at	Ffar2	free fatty acid receptor 2	233079	-1.29618	-2.45578	0.000180967	0.0027559	-1	-0.686487	-1.60936	0.0233279	0.0723425	0	0.159692	1.11705	0.571938	0.662823	0	8.09484	8.25454	6.95835	7.56805
1420518_a_at	Igsf9	immunoglobulin superfamily, member 9	93842	1.20333	2.30271	0.000181785	0.00276292	1	1.36542	2.57651	4.58521e-05	0.00102589	1	-1.04887	-2.0689	0.000693904	0.00312939	-1	8.19406	7.1452	8.34853	8.51062
1435370_a_at	Ces1d	carboxylesterase 1D	104158	1.11341	2.16356	0.000182448	0.00277028	1	1.53178	2.89142	4.37362e-06	0.000260323	1	-2.26728	-4.81413	1.62024e-08	1.20361e-06	-1	13.3167	11.0494	12.1628	12.5812
1428518_at	Mlf1ip	myeloid leukemia factor 1 interacting protein	71876	-1.12504	-2.18108	0.00018334	0.0027811	-1	-1.40974	-2.6569	1.42931e-05	0.000503736	-1	1.26323	2.40032	5.21749e-05	0.000430972	1	7.81459	9.07782	7.95278	7.66807
1436030_at	Cachd1	cache domain containing 1	320508	1.06076	2.08603	0.000183466	0.00278164	1	0.963766	1.9504	0.000475202	0.00463378	0	-1.57206	-2.97329	1.64445e-06	3.21161e-05	-1	9.41141	7.83935	8.90011	8.80312
1448260_at	Uchl1	ubiquitin carboxy-terminal hydrolase L1	22223	-2.74895	-6.72227	0.0001839	0.00278549	-1	-0.414411	-1.33275	0.49081	0.646066	0	2.75986	6.77331	0.000176504	0.00108081	1	2.08076	4.84062	2.09167	4.42621
1436738_at	Pif1	PIF1 5'-to-3' DNA helicase homolog (S. cerevisiae)	208084	-1.52638	-2.88063	0.000184176	0.0027883	-1	-1.39001	-2.6208	0.000466577	0.00458163	-1	0.874798	1.83375	0.0153492	0.0368297	0	5.67064	6.54544	5.01906	5.15543
1418471_at	Pgf	placental growth factor	18654	-1.61701	-3.06738	0.000184378	0.00279001	-1	-1.29429	-2.45257	0.00148234	0.0102145	-1	1.35146	2.5517	0.00102324	0.00424657	1	2.41998	3.77145	2.15444	2.47715
1456980_at	Rab44	RAB44, member RAS oncogene family	442827	-1.34831	-2.54614	0.000185263	0.00279585	-1	-0.610212	-1.52648	0.0488977	0.12332	0	-0.0138443	-1.00964	0.962349	0.976252	0	7.48787	7.47402	6.12571	6.86381
1421477_at	Cplx2	complexin 2	12890	1.46442	2.75952	0.000185301	0.00279585	1	1.92468	3.79652	8.00033e-06	0.000351596	1	-2.21689	-4.6489	1.24861e-06	2.61904e-05	-1	4.3752	2.15831	3.62273	4.08299
1421184_a_at				0.932516	1.9086	0.000186173	0.00280346	0	1.17731	2.26155	1.32731e-05	0.000481754	1	-0.974333	-1.96473	0.00011733	0.00079801	0	10.0975	9.12313	10.0556	10.3004
1435172_at	Eomes	eomesodermin homolog (Xenopus laevis)	13813	-2.10516	-4.30246	0.000186821	0.00280912	-1	-1.55333	-2.93494	0.00287882	0.0161581	-1	2.71482	6.56512	1.02488e-05	0.000123	1	2.08826	4.80308	2.69792	3.24975
1457914_at				1.12964	2.18804	0.00018873	0.0028276	1	0.952999	1.93589	0.000961377	0.0075448	0	-0.115028	-1.083	0.641278	0.722988	0	4.90233	4.7873	5.91694	5.7403
1424629_at	Brca1	breast cancer 1	12189	-1.44435	-2.7214	0.000189075	0.00283064	-1	-1.73164	-3.32104	2.52386e-05	0.000712859	-1	0.759756	1.6932	0.0246864	0.0540539	0	8.33976	9.09951	7.65516	7.36788
1416811_s_at				-1.09563	-2.13707	0.000189281	0.00283235	-1	-1.06741	-2.09567	0.000247038	0.00302664	-1	0.688446	1.61155	0.00895902	0.0238743	0	11.9165	12.6049	11.5093	11.5375
1452912_at	Dscc1	defective in sister chromatid cohesion 1 homolog (S. cerevisiae)	72107	-1.38349	-2.60898	0.00018984	0.00283524	-1	-1.56856	-2.96609	4.85518e-05	0.00106156	-1	0.870553	1.82836	0.00889483	0.0237257	0	7.56949	8.44004	7.05655	6.87148
1451921_a_at	Nfat5	nuclear factor of activated T cells 5	54446	1.18164	2.26835	0.000190298	0.00284036	1	1.02437	2.03406	0.000759166	0.00641304	1	-1.82323	-3.53872	9.96164e-07	2.25118e-05	-1	6.2611	4.43787	5.61951	5.46223
1448183_a_at	Hif1a	hypoxia inducible factor 1, alpha subunit	15251	-1.13715	-2.19947	0.000190591	0.00284234	-1	-0.921514	-1.8941	0.00137247	0.00967002	0	0.750774	1.6827	0.00650663	0.018412	0	11.7694	12.5202	11.383	11.5986
1449249_at	Pcdh7	protocadherin 7	54216	0.871027	1.82896	0.000191157	0.00284747	0	0.387013	1.30768	0.0533864	0.131554	0	-1.52924	-2.88635	1.60551e-07	5.94576e-06	-1	9.29914	7.7699	8.64092	8.15691
1424118_a_at	Spc25	SPC25, NDC80 kinetochore complex component, homolog (S. cerevisiae)	66442	-1.36617	-2.57785	0.00019139	0.00284747	-1	-1.70656	-3.26382	1.56228e-05	0.000532616	-1	1.01859	2.02594	0.00270538	0.00914294	1	9.01301	10.0316	8.66543	8.32504
1450697_at	Slc30a7	solute carrier family 30 (zinc transporter), member 7	66500	-0.601852	-1.51766	0.000191749	0.00284992	0	-0.618352	-1.53512	0.00014463	0.00215379	0	1.10558	2.15185	8.2866e-08	3.7673e-06	1	10.0748	11.1803	10.5785	10.562
1420904_at	Il17ra	interleukin 17 receptor A	16172	-1.06744	-2.0957	0.000193174	0.00286431	-1	-0.778732	-1.71562	0.00321742	0.0174298	0	1.0666	2.0945	0.000194731	0.00116612	1	8.12609	9.19269	8.12526	8.41396
1438055_at	Rarres1	retinoic acid receptor responder (tazarotene induced) 1	109222	0.954255	1.93758	0.000194084	0.00287445	0	1.02825	2.03955	8.77885e-05	0.00155133	1	-1.1098	-2.15816	3.71411e-05	0.000331571	-1	11.9877	10.8779	11.8321	11.9061
1431358_at	4930547N16Rik	RIKEN cDNA 4930547N16 gene	75317	-1.17145	-2.25238	0.000194351	0.00287464	-1	-1.17682	-2.26077	0.000185403	0.00254774	-1	1.12107	2.17509	0.000303029	0.00164969	1	2.07953	3.2006	2.02915	2.02378
1423611_at	Alpl	alkaline phosphatase, liver/bone/kidney	11647	-1.13428	-2.1951	0.000195256	0.00288412	-1	-1.11731	-2.16941	0.00022782	0.00288125	-1	0.442168	1.35864	0.0870836	0.148977	0	7.61091	8.05308	6.91879	6.93577
1438201_at	Pdp1	pyruvate dehyrogenase phosphatase catalytic subunit 1	381511	1.07252	2.1031	0.000195544	0.00288563	1	0.480818	1.39553	0.0519482	0.128989	0	-0.453308	-1.36918	0.0654055	0.118428	0	7.56986	7.11655	8.18906	7.59737
1444233_at	Gpr132	G protein-coupled receptor 132	56696	-1.60824	-3.0488	0.000196215	0.0028921	-1	-1.50429	-2.83684	0.000382661	0.00400332	-1	3.5883	12.0278	4.34398e-09	4.76913e-07	1	5.09301	8.68131	7.07306	7.17702
1457293_at	Zbtb4	zinc finger and BTB domain containing 4	75580	0.983778	1.97764	0.000196745	0.00289645	0	1.32882	2.51197	6.08674e-06	0.00030926	1	-1.32369	-2.50306	6.39439e-06	8.75588e-05	-1	10.6989	9.37519	10.359	10.704
1416042_s_at	Nasp	nuclear autoantigenic sperm protein (histone-binding)	50927	-0.88034	-1.84081	0.000196918	0.00289761	0	-1.06584	-2.09339	2.35404e-05	0.000681133	-1	0.827269	1.77432	0.000367004	0.00191642	0	10.6324	11.4597	10.5794	10.3939
1440220_at	Ocln	occludin	18260	0.987817	1.98318	0.000197304	0.00289916	0	0.941888	1.92104	0.000318762	0.00354104	0	-1.25517	-2.38696	1.31445e-05	0.000149451	-1	10.6073	9.35212	10.3399	10.294
1421065_at	Jak2	Janus kinase 2	16452	-0.825476	-1.77212	0.000198488	0.00291379	0	-0.732801	-1.66186	0.000634287	0.0056674	0	1.33961	2.53083	5.2242e-07	1.40122e-05	1	8.87294	10.2125	9.38707	9.47975
1448449_at	Ripk3	receptor-interacting serine-threonine kinase 3	56532	-1.40524	-2.64861	0.000198718	0.00291579	-1	-1.60691	-3.046	4.63218e-05	0.00103174	-1	1.92662	3.80164	5.08927e-06	7.34906e-05	1	8.88257	10.8092	9.40396	9.20228
1439511_at	Cdk7	cyclin-dependent kinase 7	12572	0.991244	1.9879	0.000198899	0.00291706	0	1.05151	2.0727	0.000106802	0.00178061	1	-1.40523	-2.6486	3.29819e-06	5.33222e-05	-1	8.86199	7.45677	8.44801	8.50828
1425115_at	Rbbp6	retinoblastoma binding protein 6	19647	1.0848	2.12108	0.000199343	0.00292081	1	0.92198	1.89471	0.000943655	0.00744346	0	-1.44671	-2.72585	7.27582e-06	9.63058e-05	-1	6.36185	4.91514	5.99994	5.83712
1416558_at	Melk	maternal embryonic leucine zipper kinase	17279	-1.61107	-3.05477	0.00020011	0.00293066	-1	-1.68698	-3.21982	0.000123548	0.00194758	-1	1.09577	2.13727	0.00548274	0.0160531	1	8.03265	9.12841	7.51735	7.44143
1422878_at	Syt12	synaptotagmin XII	171180	-1.60067	-3.03285	0.000201104	0.00294103	-1	-1.47443	-2.77874	0.00045383	0.0045005	-1	1.81538	3.51953	5.15574e-05	0.000427243	1	3.74566	5.56104	3.96036	4.08661
1428105_at	Tpx2	TPX2, microtubule-associated protein homolog (Xenopus laevis)	72119	-1.20201	-2.3006	0.000201455	0.00294479	-1	-1.44324	-2.7193	2.66753e-05	0.000741352	-1	0.950671	1.93277	0.00175815	0.00652561	0	9.7109	10.6616	9.45956	9.21833
1417846_at	Ulk2	Unc-51 like kinase 2 (C. elegans)	29869	1.00736	2.01023	0.000202053	0.00295073	1	0.598663	1.51431	0.0131054	0.0477456	0	-0.566868	-1.4813	0.0178815	0.0416876	0	9.79493	9.22807	10.2354	9.82673
1434581_at	2410066E13Rik	RIKEN cDNA 2410066E13 gene	68235	1.29204	2.44874	0.000203648	0.00296888	1	1.55802	2.9445	2.567e-05	0.000721838	1	-1.94232	-3.84323	1.55526e-06	3.08528e-05	-1	10.0614	8.11907	9.41111	9.67709
1452368_at	Bcr	breakpoint cluster region	110279	-1.0644	-2.09131	0.000204034	0.00296986	-1	-0.519796	-1.43375	0.0365791	0.10007	0	-0.138585	-1.10082	0.555088	0.647151	0	9.46275	9.32417	8.25976	8.80437
1419427_at	Csf3	colony stimulating factor 3 (granulocyte)	12985	-3.53509	-11.5922	0.000204273	0.00297054	-1	-3.53509	-11.5922	0.000204273	0.0027047	-1	3.53509	11.5922	0.000204273	0.001209	1	2.01891	5.554	2.01891	2.01891
1450385_at	Kpna3	karyopherin (importin) alpha 3	16648	-1.27568	-2.42112	0.000204438	0.00297072	-1	-1.28077	-2.42968	0.000196243	0.00263816	-1	1.95694	3.88239	1.18681e-06	2.53231e-05	1	3.96619	5.92313	4.64746	4.64236
1458501_at	Vapb	vesicle-associated membrane protein, associated protein B and C	56491	1.3584	2.56401	0.000204623	0.00297072	1	1.68261	3.21008	1.87246e-05	0.00058735	1	-1.89401	-3.71667	4.24771e-06	6.44969e-05	-1	7.31681	5.4228	6.7812	7.10541
1453011_at	Bdh2	3-hydroxybutyrate dehydrogenase, type 2	69772	2.2447	4.7394	0.000204668	0.00297072	1	2.29169	4.89628	0.000165195	0.00237906	1	-1.72017	-3.29475	0.00229644	0.00803909	-1	6.72913	5.00896	7.25366	7.30064
1431924_at	4930432N10Rik	RIKEN cDNA 4930432N10 gene	74630	2.15336	4.44862	0.000204669	0.00297072	1	2.32817	5.02169	8.95285e-05	0.0015731	1	-3.23675	-9.42669	1.56806e-06	3.099e-05	-1	6.02687	2.79012	4.94348	5.11829
1417981_at	Insig2	insulin induced gene 2	72999	0.65428	1.57383	0.000205093	0.00297549	0	0.951935	1.93447	2.43431e-06	0.000177751	0	-1.08439	-2.12048	4.05843e-07	1.16234e-05	-1	11.7765	10.6921	11.3464	11.644
1437251_at	Cdca2	cell division cycle associated 2	108912	-1.81434	-3.51698	0.000205904	0.00298306	-1	-1.87306	-3.6631	0.000147898	0.00218356	-1	1.01063	2.01479	0.0190943	0.0439457	1	5.21111	6.22174	4.4074	4.34868
1420707_a_at	Traip	TRAF-interacting protein	22036	-1.7501	-3.36381	0.000206414	0.00298591	-1	-2.06017	-4.17034	3.45935e-05	0.000871451	-1	1.30549	2.47168	0.00285234	0.00954583	1	5.87006	7.17555	5.42545	5.11538
1447166_at				1.0831	2.11858	0.000208656	0.00301306	1	0.944515	1.92454	0.000780326	0.00653649	0	-1.16464	-2.24177	9.70012e-05	0.000688833	-1	3.48383	2.3192	3.40229	3.26371
1427083_a_at	Map4k5	mitogen-activated protein kinase kinase kinase kinase 5	399510	-0.95758	-1.94205	0.000208792	0.00301361	0	-1.01624	-2.02264	0.000111866	0.00183802	-1	1.92439	3.79576	2.42572e-08	1.58106e-06	1	7.60001	9.5244	8.56682	8.50816
1450920_at	Ccnb2	cyclin B2	12442	-1.16509	-2.24247	0.00020987	0.00302494	-1	-1.19972	-2.29694	0.000154946	0.00226316	-1	0.890181	1.85341	0.00239706	0.00831262	0	9.529	10.4192	9.25409	9.21946
1459632_at				0.885935	1.84796	0.000210469	0.00303075	0	1.1299	2.18844	1.35686e-05	0.000489607	1	-0.928884	-1.9038	0.00012842	0.000855028	0	9.39079	8.46191	9.34784	9.59181
1427164_at	Il13ra1	interleukin 13 receptor, alpha 1	16164	-0.91197	-1.88161	0.000210737	0.00303234	0	-1.17895	-2.26412	1.15014e-05	0.000441839	-1	1.74763	3.35807	5.0545e-08	2.63891e-06	1	9.98194	11.7296	10.8176	10.5506
1429734_at	4632434I11Rik	RIKEN cDNA 4632434I11 gene	74041	-1.5614	-2.95139	0.000211919	0.00304597	-1	-1.61054	-3.05366	0.000153732	0.00225152	-1	1.53927	2.90648	0.000244983	0.00139655	1	5.17426	6.71353	5.15214	5.103
1440826_s_at	2610002I17Rik	RIKEN cDNA 2610002I17	72341	-0.953392	-1.93642	0.000212037	0.00304625	0	-0.883198	-1.84446	0.000451629	0.0044873	0	1.04234	2.05957	8.22917e-05	0.000604735	1	7.77885	8.82119	7.8678	7.93799
1459238_at				1.18156	2.26821	0.000212567	0.00305044	1	1.27195	2.41488	9.77214e-05	0.00166983	1	-1.15921	-2.23336	0.00025795	0.00145436	-1	7.63221	6.47299	7.65455	7.74494
1426040_a_at	Odf2	outer dense fiber of sperm tails 2	18286	-1.22908	-2.34418	0.000212921	0.00305045	-1	-0.468561	-1.38373	0.0963043	0.201023	0	0.97092	1.96009	0.0018557	0.00679109	0	6.46421	7.43513	6.20605	6.96657
1442648_at	Zfp563	zinc finger protein 563	240068	0.783441	1.72123	0.000213312	0.00305464	0	1.07168	2.10187	5.72746e-06	0.000305335	1	-1.4044	-2.64707	1.38468e-07	5.37215e-06	-1	8.52849	7.1241	7.90754	8.19577
1427541_x_at	Hmmr	hyaluronan mediated motility receptor (RHAMM)	15366	-1.43888	-2.71111	0.000213975	0.00306131	-1	-1.97572	-3.93323	5.47771e-06	0.000296486	-1	1.23872	2.35989	0.000895379	0.00382094	1	5.39444	6.63316	5.19428	4.65744
1436194_at	Prelid2	PRELI domain containing 2	77619	-1.00326	-2.00452	0.000214532	0.00306785	-1	-0.743358	-1.67407	0.00309098	0.0169495	0	0.640716	1.5591	0.00873183	0.0233816	0	8.48919	9.12991	8.12665	8.38655
1430662_at	9430091E24Rik	RIKEN cDNA 9430091E24 gene	434350	1.03028	2.04242	0.000215042	0.00306949	1	0.663985	1.58445	0.00824822	0.0341625	0	-0.988887	-1.98465	0.000324463	0.00174066	0	5.86473	4.87584	5.90613	5.53983
1417256_at	Mmp13	matrix metallopeptidase 13	17386	-3.49899	-11.3058	0.000215104	0.00306949	-1	-4.58406	-23.985	9.99005e-06	0.000402252	-1	4.99472	31.8831	3.33007e-06	5.37533e-05	1	2.38438	7.3791	3.88011	2.79504
1444611_at				1.61443	3.06191	0.000215124	0.00306949	1	1.08289	2.11828	0.00633162	0.0281161	1	-1.5028	-2.83392	0.000437154	0.00218587	-1	7.02965	5.52686	7.14129	6.60975
1450922_a_at	Tgfb2	transforming growth factor, beta 2	21808	1.40093	2.64072	0.000215539	0.00306949	1	1.74129	3.34335	1.90953e-05	0.000594455	1	-1.57741	-2.98433	6.03859e-05	0.00048219	-1	9.50474	7.92733	9.32826	9.66863
1428289_at	Klf9	Kruppel-like factor 9	16601	0.864515	1.82073	0.000215647	0.00306963	0	1.11634	2.16796	1.19928e-05	0.000453908	1	-0.82638	-1.77323	0.000338743	0.00180321	0	11.3439	10.5175	11.382	11.6338
1426159_x_at	Tcrb-J	T cell receptor beta, joining region	21580	-0.951668	-1.93411	0.000215975	0.00307289	0	-0.888711	-1.85152	0.000425469	0.00430193	0	1.87479	3.66749	3.45425e-08	2.014e-06	1	10.4019	12.2767	11.3251	11.388
1444088_at				-1.91931	-3.78241	0.000216409	0.00307369	-1	-1.61162	-3.05594	0.0011255	0.00846584	-1	2.23587	4.71048	4.11904e-05	0.000358621	1	7.49337	9.72925	7.80994	8.11763
1416178_a_at	Plekhb1	pleckstrin homology domain containing, family B (evectins) member 1	27276	1.69236	3.23185	0.000217031	0.00307941	1	2.0696	4.19769	2.33937e-05	0.00067879	1	-2.44811	-5.457	2.82787e-06	4.7842e-05	-1	9.09053	6.64243	8.33479	8.71202
1436092_at				1.09512	2.1363	0.000217203	0.00308045	1	1.68124	3.20704	1.27339e-06	0.00011895	1	-0.645487	-1.56427	0.0143284	0.0348528	0	7.80435	7.15887	8.25398	8.84011
1426095_a_at	Tnfrsf22	tumor necrosis factor receptor superfamily, member 22	79202	-1.57291	-2.97504	0.000218532	0.00309646	-1	-1.07466	-2.10623	0.00564027	0.0258541	-1	1.57847	2.98654	0.000210793	0.00124161	1	4.85682	6.43529	4.86238	5.36063
1448618_at	Mvp	major vault protein	78388	-0.897522	-1.86286	0.000218724	0.00309775	0	-0.647488	-1.56644	0.00382829	0.019687	0	1.51799	2.86392	3.32652e-07	1.00871e-05	1	10.2047	11.7227	10.8251	11.0752
1458126_at	D030041H20Rik	RIKEN cDNA D030041H20 gene	320036	1.21793	2.32613	0.000219178	0.00310135	1	1.44154	2.71611	3.47668e-05	0.000871814	1	-1.15067	-2.22016	0.000385634	0.00198966	-1	6.89843	5.74776	6.96569	7.1893
1441984_at	Clspn	claspin homolog (Xenopus laevis)	269582	-1.56071	-2.94998	0.000221213	0.00311812	-1	-1.63192	-3.09926	0.000139197	0.00210299	-1	0.950326	1.93231	0.0119549	0.0300547	0	5.34077	6.2911	4.73039	4.65917
1447588_x_at				0.815408	1.7598	0.000222452	0.00313335	0	0.735581	1.66507	0.000606079	0.00548501	0	-1.43023	-2.69489	2.01855e-07	6.95155e-06	-1	4.38892	2.9587	3.7741	3.69428
1460571_at	Dicer1	Dicer1, Dcr-1 homolog (Drosophila)	192119	0.443905	1.36028	0.000224208	0.00315092	0	0.763361	1.69744	2.71519e-07	5.15719e-05	0	-1.02792	-2.03908	2.96415e-09	3.61931e-07	-1	11.6216	10.5937	11.0376	11.357
1451358_a_at	Racgap1	Rac GTPase-activating protein 1	26934	-1.35546	-2.55879	0.000225013	0.0031608	-1	-1.66789	-3.1775	2.26678e-05	0.000661448	-1	0.802741	1.74441	0.014223	0.0346291	0	7.39856	8.2013	6.84584	6.53341
1440726_at				1.99401	3.98342	0.000226916	0.00318032	1	1.49186	2.81252	0.00299356	0.016578	1	-2.71063	-6.54607	6.70277e-06	9.07098e-05	-1	6.2871	3.57647	5.57048	5.06833
1454850_at	Tbc1d10c	TBC1 domain family, member 10c	108995	-1.49387	-2.81644	0.000228508	0.00319372	-1	-0.915879	-1.88672	0.0116946	0.043956	0	3.05872	8.33232	2.08731e-08	1.42341e-06	1	5.91763	8.97634	7.48247	8.06047
1444785_at				0.893011	1.85705	0.000228843	0.0031956	0	1.29356	2.45132	2.97514e-06	0.000203784	1	-1.30418	-2.46943	2.67032e-06	4.57516e-05	-1	11.1376	9.83338	10.7264	11.1269
1424651_at	Acsf3	acyl-CoA synthetase family member 3	257633	-1.1233	-2.17845	0.000229457	0.00319736	-1	-0.387313	-1.30796	0.132612	0.253827	0	0.812491	1.75624	0.00388767	0.0122096	0	7.07301	7.8855	6.7622	7.49819
1435544_at				-1.04626	-2.06518	0.000229949	0.00320109	-1	-0.76708	-1.70182	0.00352279	0.0185644	0	0.532347	1.44628	0.031921	0.0664073	0	9.78159	10.3139	9.26767	9.54686
1450791_at	Nppb	natriuretic peptide type B	18158	-3.38019	-10.4121	0.000230176	0.00320136	-1	-2.00255	-4.00707	0.0143782	0.0511019	0	3.37825	10.3981	0.000231522	0.00133332	1	2.02248	5.40073	2.02054	3.39818
1419217_at	Sergef	secretion regulating guanine nucleotide exchange factor	27414	-0.844028	-1.79505	0.000233107	0.00323515	0	-0.900594	-1.86683	0.00011854	0.00189959	0	1.17748	2.26182	4.97554e-06	7.23053e-05	1	7.3992	8.57668	7.73265	7.67609
1439260_a_at	Enpp3	ectonucleotide pyrophosphatase/phosphodiesterase 3	209558	1.45884	2.74887	0.000233128	0.00323515	1	1.3833	2.60864	0.00039479	0.00408649	1	-0.922066	-1.89483	0.00981676	0.0256478	0	8.40895	7.48689	8.94573	8.87019
1428978_at	2900009J20Rik	RIKEN cDNA 2900009J20 gene	72876	0.768126	1.70306	0.000233348	0.00323677	0	0.643171	1.56176	0.00122925	0.00898445	0	-1.22912	-2.34424	7.93542e-07	1.91788e-05	-1	8.2879	7.05877	7.8269	7.70195
1453860_s_at	Nr3c1	nuclear receptor subfamily 3, group C, member 1	14815	1.02968	2.04157	0.000233969	0.00324102	1	0.954728	1.93821	0.000490911	0.00474733	0	-1.4304	-2.69521	5.27982e-06	7.56753e-05	-1	8.36789	6.93749	7.96717	7.89222
1440899_at	Fmo5	flavin containing monooxygenase 5	14263	1.90121	3.73527	0.000235002	0.00325242	1	1.45731	2.74596	0.00254988	0.0148141	1	-1.63655	-3.10921	0.000972458	0.00407296	-1	6.85485	5.2183	7.11951	6.67561
1459462_at				1.39359	2.62732	0.000236628	0.00326617	1	1.73841	3.33667	2.04232e-05	0.000620513	1	-1.01063	-2.01479	0.00389976	0.0122327	-1	4.77286	3.76223	5.15582	5.50064
1455124_at	Trim68	tripartite motif-containing 68	101700	0.51488	1.42888	0.000236927	0.0032677	0	0.792814	1.73245	1.37377e-06	0.000125463	0	-1.18268	-2.26997	3.67346e-09	4.22789e-07	-1	10.3157	9.13305	9.64793	9.92587
1455067_at	Psd4	pleckstrin and Sec7 domain containing 4	215632	-0.776513	-1.71299	0.000239285	0.00328818	0	-0.531175	-1.44511	0.00594859	0.0268389	0	1.4571	2.74556	8.33608e-08	3.77506e-06	1	7.51126	8.96837	8.19185	8.43719
1417323_at	Psrc1	proline/serine-rich coiled-coil 1	56742	-1.35502	-2.55801	0.000239914	0.00329535	-1	-1.02028	-2.02832	0.00297334	0.0165078	-1	1.30329	2.46792	0.000353324	0.00186004	1	9.50312	10.8064	9.45139	9.78613
1448507_at	Efhd1	EF hand domain containing 1	98363	1.47017	2.77054	0.000240301	0.0032992	1	1.36729	2.57986	0.000489071	0.0047362	1	-2.611	-6.10929	1.88142e-07	6.6619e-06	-1	10.994	8.38299	9.85316	9.75028
1417595_at	Meox1	mesenchyme homeobox 1	17285	-1.02512	-2.03513	0.000241059	0.00330799	-1	-0.448079	-1.36422	0.0622447	0.146669	0	0.188727	1.13976	0.413781	0.512672	0	7.59656	7.78529	6.76017	7.33721
1435155_at	Cgn	cingulin	70737	1.31468	2.48747	0.000241154	0.00330799	1	1.68187	3.20844	1.53939e-05	0.000526626	1	-1.80221	-3.48755	6.5025e-06	8.8608e-05	-1	10.9852	9.18302	10.4977	10.8649
1427469_at	Helz	helicase with zinc finger domain	78455	0.829343	1.77688	0.000241468	0.00331083	0	0.794445	1.73441	0.000369916	0.00390741	0	-1.05836	-2.08256	1.58894e-05	0.000172186	-1	8.76605	7.70769	8.53704	8.50214
1423520_at	Lmnb1	lamin B1	16906	-1.473	-2.77598	0.000241709	0.00331267	-1	-1.30145	-2.46477	0.000790011	0.00659338	-1	0.812655	1.75644	0.0218542	0.0490541	0	8.63165	9.44431	7.97131	8.14286
1415901_at	Plod3	procollagen-lysine, 2-oxoglutarate 5-dioxygenase 3	26433	-1.16332	-2.23972	0.000242077	0.00331623	-1	-1.13061	-2.18952	0.000321795	0.00356195	-1	0.953737	1.93688	0.00151567	0.00581549	0	8.56469	9.51843	8.35512	8.38782
1416414_at	Emilin1	elastin microfibril interfacer 1	100952	-1.2705	-2.41245	0.000245625	0.00335445	-1	-1.134	-2.19466	0.000731005	0.00624846	-1	1.39811	2.63556	8.97942e-05	0.000648176	1	6.35642	7.75453	6.48403	6.62053
1430617_at	Oip5	Opa interacting protein 5	70645	-1.1155	-2.16671	0.000245816	0.00335558	-1	-1.53462	-2.89712	6.36616e-06	0.000316366	-1	0.818636	1.76374	0.00367307	0.011673	0	5.91486	6.7335	5.61799	5.19887
1420537_at	Kctd4	potassium channel tetramerisation domain containing 4	67516	1.37955	2.60188	0.000246935	0.00336049	1	0.981778	1.9749	0.00460867	0.0224869	0	0.590321	1.50558	0.0680273	0.1222	0	9.04022	9.63054	11.0101	10.6123
1434794_at	Rhof	ras homolog gene family, member f	23912	-1.83719	-3.57313	0.000247212	0.00336278	-1	-1.32561	-2.50639	0.00417615	0.0209416	-1	3.55959	11.7908	5.42527e-08	2.78573e-06	1	3.89135	7.45093	5.61374	6.12532
1426837_at	Metap1	methionyl aminopeptidase 1	75624	-1.05732	-2.08106	0.00024893	0.00337481	-1	-1.15434	-2.22583	9.92967e-05	0.00168618	-1	1.19595	2.29095	6.72626e-05	0.000521914	1	6.85403	8.04998	6.99266	6.89563
1424375_s_at	Gimap4	GTPase, IMAP family member 4	107526	-1.26184	-2.39802	0.000248968	0.00337481	-1	-1.2025	-2.30138	0.000400576	0.00412432	-1	2.95201	7.73825	2.96933e-09	3.61931e-07	1	8.12342	11.0754	9.81358	9.87293
1443996_at				1.47352	2.77698	0.000249314	0.00337801	1	1.93376	3.82049	1.17185e-05	0.000446957	1	-1.67554	-3.19438	6.35201e-05	0.00050104	-1	8.90227	7.22673	8.70025	9.16049
1442058_s_at	Psmc3ip	proteasome (prosome, macropain) 26S subunit, ATPase 3, interacting protein	19183	-1.00338	-2.00469	0.000250214	0.00338692	-1	-1.03102	-2.04347	0.000189645	0.00258995	-1	0.616029	1.53265	0.0122378	0.030639	0	9.37075	9.98678	8.9834	8.95576
1456984_at	Scml2	sex comb on midleg-like 2 (Drosophila)	107815	0.882292	1.8433	0.000251782	0.0034055	0	0.52558	1.43951	0.0146612	0.0517808	0	-1.61929	-3.07225	1.24569e-07	5.02825e-06	-1	8.53022	6.91092	7.79321	7.4365
1440969_at	BC030308	cDNA sequence BC030308	407797	0.874263	1.83307	0.000252229	0.00341005	0	0.892163	1.85596	0.000205283	0.0027076	0	-1.08275	-2.11807	2.40081e-05	0.00023619	-1	8.75544	7.67269	8.54695	8.56485
1424262_at	Aif1l	allograft inflammatory factor 1-like	108897	1.1054	2.15159	0.000252527	0.00341258	1	1.10149	2.14577	0.000261687	0.0031465	1	-0.600898	-1.51666	0.0241275	0.053106	0	4.92544	4.32454	5.42994	5.42603
1453913_a_at	Tap2	transporter 2, ATP-binding cassette, sub-family B (MDR/TAP)	21355	-1.12852	-2.18634	0.000255251	0.00344156	-1	-0.636931	-1.55502	0.0199356	0.064779	0	1.31094	2.48104	5.12573e-05	0.000425449	1	9.32446	10.6354	9.50688	9.99847
1441381_at	9430029E18Rik	RIKEN cDNA 9430029E18 gene	320780	0.957894	1.94247	0.000255866	0.00344717	0	1.54651	2.92109	7.95785e-07	9.12699e-05	1	-0.994278	-1.99208	0.000174777	0.00107299	0	6.15077	5.15649	6.11438	6.703
1423516_a_at	Nid2	nidogen 2	18074	-1.06368	-2.09026	0.000256917	0.00345832	-1	-0.888297	-1.85099	0.00136364	0.00963221	0	-0.951107	-1.93336	0.000748926	0.00333047	0	9.54372	8.59262	7.52893	7.70432
1441445_at	Per3	period homolog 3 (Drosophila)	18628	1.49375	2.81621	0.00025717	0.00345873	1	1.5108	2.84968	0.000229305	0.00289531	1	0.635492	1.55347	0.0705266	0.125879	0	6.17631	6.81181	8.30556	8.32261
1423600_a_at	Tcof1	Treacher Collins Franceschetti syndrome 1, homolog	21453	-1.07657	-2.10902	0.00025756	0.00346246	-1	-0.73403	-1.66328	0.0063923	0.0283111	0	0.542323	1.45632	0.0352449	0.0717619	0	8.65015	9.19247	8.1159	8.45844
1445088_at				1.3664	2.57827	0.000258158	0.00346582	1	0.97414	1.96447	0.00469651	0.0227949	0	-1.57345	-2.97616	5.73176e-05	0.000461642	-1	7.89903	6.32557	7.69198	7.29971
1447587_at				1.42085	2.67743	0.000258487	0.0034659	1	1.30242	2.46642	0.000599608	0.00543916	1	-1.98326	-3.95386	5.63641e-06	7.95003e-05	-1	5.69348	3.71022	5.13107	5.01264
1425792_a_at	Rorc	RAR-related orphan receptor gamma	19885	1.35234	2.55326	0.000258605	0.00346598	1	2.24097	4.72715	5.61475e-07	7.62424e-05	1	-2.18253	-4.53948	8.11746e-07	1.94668e-05	-1	8.10423	5.9217	7.27404	8.16267
1419524_at	Tph1	tryptophan hydroxylase 1	21990	-1.65154	-3.14168	0.000260537	0.00348493	-1	-2.0694	-4.19713	2.17036e-05	0.000643625	-1	3.08158	8.46542	1.02695e-07	4.3828e-06	1	3.48973	6.57131	4.91977	4.5019
1439747_at	Ptges	prostaglandin E synthase	64292	-1.11147	-2.16065	0.000260695	0.00348493	-1	-0.722644	-1.6502	0.00880682	0.0358028	0	1.44651	2.72548	1.3717e-05	0.000154428	1	10.2649	11.7114	10.5999	10.9887
1418764_a_at	Bpnt1	bisphosphate 3'-nucleotidase 1	23827	-1.13719	-2.19953	0.000261254	0.0034909	-1	-1.01196	-2.01665	0.000794079	0.00661206	-1	0.534576	1.44852	0.048044	0.0922445	0	6.76963	7.30421	6.16702	6.29225
1447621_s_at	Tmem173	transmembrane protein 173	72512	-1.38921	-2.61935	0.000263823	0.00351612	-1	-1.52745	-2.88276	9.79173e-05	0.00167118	-1	1.55848	2.94544	7.85663e-05	0.000586402	1	10.0249	11.5834	10.1942	10.0559
1440224_at				-1.00689	-2.00957	0.000265501	0.00352531	-1	-0.516127	-1.43011	0.0329653	0.093013	0	1.42149	2.67862	5.04069e-06	7.29251e-05	1	6.40199	7.82348	6.8166	7.30736
1439434_x_at	Sh2d5	SH2 domain containing 5	230863	-1.91489	-3.77085	0.000265504	0.00352531	-1	-2.25227	-4.76432	4.6517e-05	0.0010346	-1	2.24385	4.73659	4.85486e-05	0.000407556	1	2.78087	5.02472	3.10983	2.77245
1437064_at	Ar	androgen receptor	11835	0.942234	1.9215	0.000265537	0.00352531	0	1.12198	2.17646	4.03884e-05	0.000958181	1	-1.32412	-2.5038	5.34875e-06	7.63825e-05	-1	12.2857	10.9616	11.9039	12.0836
1453365_at	Rabgap1l	RAB GTPase activating protein 1-like	29809	-0.836857	-1.78615	0.000266889	0.00354023	0	-1.23635	-2.35602	2.80454e-06	0.000197337	-1	2.00946	4.0263	2.18834e-09	2.89535e-07	1	6.84913	8.85859	8.02173	7.62224
1436649_at	Ikzf3	IKAROS family zinc finger 3	22780	-1.21844	-2.32695	0.000267164	0.00354236	-1	-0.888044	-1.85066	0.00410583	0.0206959	0	5.00613	32.1364	2.59316e-13	7.84679e-10	1	3.77319	8.77932	7.56088	7.89128
1422667_at	Krt15	keratin 15	16665	0.703686	1.62866	0.000267285	0.00354244	0	0.895605	1.86039	1.85493e-05	0.000583625	0	-1.04459	-2.06278	2.63754e-06	4.53153e-05	-1	14.6832	13.6386	14.3423	14.5342
1420987_at	Kif3b	kinesin family member 3B	16569	-0.759517	-1.69292	0.000267713	0.0035444	0	-0.90303	-1.86999	4.14912e-05	0.00097334	0	1.23668	2.35655	7.53069e-07	1.849e-05	1	2.58687	3.82355	3.06403	2.92052
1426334_a_at	Bcl2l11	BCL2-like 11 (apoptosis facilitator)	12125	-1.8875	-3.69995	0.000267776	0.0035444	-1	-1.8563	-3.62077	0.000316079	0.00352388	-1	1.94395	3.84757	0.00019856	0.00118265	1	2.02947	3.97342	2.08591	2.11712
1452830_s_at	Cad	carbamoyl-phosphate synthetase 2, aspartate transcarbamylase, and dihydroorotase	69719	-1.65467	-3.1485	0.000268078	0.0035444	-1	-1.06971	-2.09901	0.00929402	0.0371762	-1	0.143833	1.10484	0.700525	0.773254	0	9.15711	9.30094	7.64628	8.23124
1434015_at	Slc2a6	solute carrier family 2 (facilitated glucose transporter), member 6	227659	-1.66969	-3.18146	0.000269216	0.00355737	-1	-1.4875	-2.80402	0.000807507	0.00669559	-1	3.05181	8.2925	1.45908e-07	5.56091e-06	1	7.02524	10.0771	8.40736	8.58955
1429285_at	Serpina9	serine (or cysteine) peptidase inhibitor, clade A (alpha-1 antiproteinase, antitrypsin), member 9	71907	-4.18769	-18.223	0.000270065	0.00356403	-1	-3.14501	-8.84593	0.00331517	0.0178128	-1	4.0714	16.8118	0.000356788	0.00187353	1	4.3822	8.45361	4.26592	5.30859
1451410_a_at	Crip3	cysteine-rich protein 3	114570	1.54462	2.91728	0.000270762	0.00357018	1	1.62946	3.09397	0.00015656	0.00228314	1	-1.74447	-3.35072	7.50835e-05	0.00056711	-1	8.02212	6.27765	7.82227	7.90711
1448205_at	Ccnb1	cyclin B1	268697	-1.18426	-2.27247	0.000274934	0.00361038	-1	-1.39989	-2.63881	4.57199e-05	0.00102572	-1	1.00421	2.00584	0.0012684	0.00503781	1	9.88018	10.8844	9.70013	9.4845
1442134_at	Prr11	proline rich 11	270906	-1.22673	-2.34036	0.000274944	0.00361038	-1	-1.40857	-2.65475	6.35208e-05	0.00126145	-1	0.747364	1.67872	0.0135411	0.0332224	0	8.29877	9.04613	7.8194	7.63756
1439843_at	Camk4	calcium/calmodulin-dependent protein kinase IV	12326	-1.71791	-3.28959	0.000275188	0.00361163	-1	-0.214645	-1.16042	0.582182	0.726437	0	1.64704	3.13191	0.000416032	0.00210474	1	4.88371	6.53076	4.81285	6.31611
1442833_at	D15Ertd30e	DNA segment, Chr 15, ERATO Doi 30, expressed	52238	0.869384	1.82688	0.000276219	0.00361839	0	1.05124	2.0723	3.53942e-05	0.000882289	1	-1.03744	-2.05258	4.12411e-05	0.000358961	-1	3.77562	2.73818	3.60757	3.78942
1429792_at	Btbd19	BTB (POZ) domain containing 19	78611	-1.38033	-2.60328	0.000276419	0.00361839	-1	-0.895822	-1.86067	0.0092461	0.037037	0	1.47866	2.7869	0.000136118	0.000891706	1	7.05116	8.52983	7.1495	7.634
1425226_x_at				-1.06303	-2.08932	0.000276554	0.00361839	-1	-0.884527	-1.84616	0.00149594	0.0102761	0	1.88445	3.69213	2.36543e-07	7.83247e-06	1	10.5762	12.4607	11.3977	11.5762
1438211_s_at	Dbp	D site albumin promoter binding protein	13170	1.35467	2.55739	0.000278693	0.00363967	1	1.2659	2.40477	0.000537348	0.00504589	1	0.943388	1.92304	0.00583858	0.0168669	0	10.0001	10.9435	12.2981	12.2094
1458769_at	D7Ertd558e	DNA segment, Chr 7, ERATO Doi 558, expressed	52365	1.46484	2.76033	0.00027963	0.00364674	1	1.79141	3.46154	3.1462e-05	0.00082061	1	-1.69859	-3.24583	5.79778e-05	0.000465265	-1	6.20754	4.50896	5.9738	6.30037
1436453_at	BB144871	expressed sequence BB144871	101918	1.6202	3.07418	0.00028279	0.00368174	1	1.31928	2.49541	0.00182262	0.0116708	1	-2.86047	-7.26249	2.59049e-07	8.38052e-06	-1	8.20397	5.3435	6.96371	6.66278
1448551_a_at	Trim2	tripartite motif-containing 2	80890	1.21169	2.31608	0.000283192	0.00368313	1	1.31323	2.48497	0.000123387	0.00194603	1	-2.39183	-5.24824	5.02595e-08	2.62844e-06	-1	9.82251	7.43067	8.64236	8.7439
1426839_at	Pold3	polymerase (DNA-directed), delta 3, accessory subunit	67967	-0.821626	-1.7674	0.000283281	0.00368313	0	-0.859547	-1.81447	0.000179039	0.00249126	0	1.68423	3.2137	2.84145e-08	1.77719e-06	1	7.57646	9.2607	8.43907	8.40115
1419332_at	Egfl6	EGF-like-domain, multiple 6	54156	1.12839	2.18615	0.000283283	0.00368313	1	1.83744	3.57376	8.13646e-07	9.12699e-05	1	-3.37542	-10.3777	6.59554e-11	2.37439e-08	-1	5.54479	2.16938	3.29777	4.00682
1422472_at	Pex13	peroxisomal biogenesis factor 13	72129	1.01048	2.01458	0.000284093	0.00368785	1	0.390487	1.31084	0.100992	0.208211	0	-0.228805	-1.17186	0.32478	0.421848	0	6.46421	6.23541	7.24588	6.62589
1420408_a_at	Abcc9	ATP-binding cassette, sub-family C (CFTR/MRP), member 9	20928	1.71839	3.29069	0.000286141	0.00370976	1	2.34031	5.06413	8.7603e-06	0.000370012	1	-2.51653	-5.72206	3.45029e-06	5.50623e-05	-1	7.98297	5.46644	7.18482	7.80675
1419334_at	Ctla4	cytotoxic T-lymphocyte-associated protein 4	12477	-1.7678	-3.40535	0.000286882	0.00371526	-1	-1.25132	-2.38059	0.0053212	0.0248006	-1	3.14614	8.85281	2.3569e-07	7.81258e-06	1	6.4034	9.54954	7.78173	8.29822
1437114_at	A930001N09Rik	RIKEN cDNA A930001N09 gene	77128	1.22279	2.33398	0.000287512	0.00371665	1	0.852067	1.80509	0.00594035	0.0268293	0	-0.804443	-1.74647	0.00869576	0.0233011	0	7.12426	6.31982	7.54261	7.17188
1452384_at	Enpp3	ectonucleotide pyrophosphatase/phosphodiesterase 3	209558	1.98106	3.94784	0.000289181	0.00373208	1	2.12066	4.34894	0.000143882	0.00214575	1	-1.29295	-2.45028	0.00918191	0.0243529	-1	6.40668	5.11373	7.09479	7.23439
1433974_at	Sephs1	selenophosphate synthetase 1	109079	-0.923914	-1.89726	0.000289188	0.00373208	0	-0.723879	-1.65162	0.00252516	0.0146979	0	1.07535	2.10724	5.774e-05	0.000464199	1	7.63515	8.7105	7.78659	7.98663
1456344_at	Tnc	tenascin C	21923	-3.48571	-11.2022	0.000289414	0.00373345	-1	-3.84324	-14.3526	0.000105043	0.00175967	-1	5.08463	33.9332	3.68788e-06	5.83068e-05	1	4.52341	9.60804	6.12233	5.7648
1439510_at	Sgol1	shugoshin-like 1 (S. pombe)	72415	-1.36045	-2.56765	0.000290176	0.00373777	-1	-1.27985	-2.42815	0.000524096	0.00496057	-1	0.726671	1.65482	0.028238	0.0601726	0	5.90289	6.62956	5.26911	5.3497
1455687_at	Ick	intestinal cell kinase	56542	0.891293	1.85484	0.000291185	0.00374544	0	1.0091	2.01265	7.91934e-05	0.00144993	1	-1.49738	-2.8233	5.46988e-07	1.44715e-05	-1	8.44563	6.94825	7.83954	7.95735
1423851_a_at	Shisa2	shisa homolog 2 (Xenopus laevis)	219134	0.795217	1.73534	0.000291191	0.00374544	0	0.847383	1.79923	0.000152062	0.00223651	0	-1.84434	-3.59088	4.36406e-09	4.77182e-07	-1	11.8984	10.0541	10.8493	10.9014
1446791_at	Pi15	peptidase inhibitor 15	94227	-1.70578	-3.26206	0.000292794	0.00375982	-1	-2.44686	-5.45227	4.65666e-06	0.000265996	-1	0.462223	1.37766	0.242688	0.334772	0	7.02318	7.4854	5.77962	5.03854
1419317_x_at	Lce3c	late cornified envelope 3C	94060	-2.06343	-4.17979	0.000294252	0.00377383	-1	-1.88296	-3.6883	0.000704193	0.0060916	-1	4.77389	27.358	4.61356e-09	4.94241e-07	1	9.32126	14.0952	12.0317	12.2122
1419394_s_at	S100a8	S100 calcium binding protein A8 (calgranulin A)	20201	-1.73387	-3.3262	0.000296166	0.00379053	-1	-1.07831	-2.11157	0.0125314	0.0461144	-1	5.2046	36.8756	6.70801e-11	2.38713e-08	1	9.85615	15.0607	13.3269	13.9824
1446374_at	Arhgef10	Rho guanine nucleotide exchange factor (GEF) 10	234094	1.28262	2.43281	0.000296604	0.00379143	1	1.4574	2.74613	7.76734e-05	0.00143654	1	-0.621493	-1.53847	0.0445964	0.0868471	0	5.01835	4.39685	5.67948	5.85425
1417939_at	Rad51ap1	RAD51 associated protein 1	19362	-2.06969	-4.19796	0.000298103	0.00380224	-1	-2.37424	-5.18464	7.02818e-05	0.00134762	-1	1.41135	2.65985	0.00704543	0.0196457	1	4.47134	5.88269	3.813	3.50844
1448187_at	Pold1	polymerase (DNA directed), delta 1, catalytic subunit	18971	-1.1563	-2.22885	0.000298186	0.00380224	-1	-1.03958	-2.05562	0.000815693	0.00674515	-1	0.366156	1.28891	0.175803	0.259752	0	5.53761	5.90377	4.74746	4.86419
1423679_at	2810432L12Rik	RIKEN cDNA 2810432L12 gene	67063	0.760795	1.69442	0.000301135	0.00381977	0	1.20445	2.30449	1.30397e-06	0.000120025	1	-1.76073	-3.3887	4.76151e-09	5.01416e-07	-1	9.59176	7.83103	8.59182	9.03548
1419097_a_at	Stom	stomatin	13830	-0.919291	-1.89119	0.000301892	0.00382577	0	-0.906557	-1.87457	0.00034637	0.00374297	0	1.579	2.98762	4.21288e-07	1.19224e-05	1	10.7088	12.2878	11.3685	11.3812
1455521_at	Klf12	Kruppel-like factor 12	16597	1.01181	2.01643	0.000302308	0.00382577	1	0.58446	1.49948	0.0192758	0.0632248	0	-0.448001	-1.36415	0.064582	0.11727	0	4.62792	4.17992	5.19173	4.76438
1450569_a_at	Rbm14	RNA binding motif protein 14	56275	-1.05062	-2.07141	0.000302373	0.00382577	-1	-0.788571	-1.72736	0.00362404	0.0189404	0	0.457237	1.37291	0.0688677	0.123359	0	8.64319	9.10042	8.04981	8.31185
1431497_at	C330022C24Rik	RIKEN cDNA C330022C24 gene	78520	-0.807516	-1.7502	0.000302508	0.00382577	0	-0.881239	-1.84196	0.000123052	0.00194282	0	1.33483	2.52245	7.23959e-07	1.79024e-05	1	7.06215	8.39698	7.58946	7.51574
1422007_at	Aqp3	aquaporin 3	11828	-1.69913	-3.24705	0.000306219	0.00386173	-1	-1.50893	-2.84599	0.000932365	0.0073845	-1	1.98764	3.96589	5.82075e-05	0.000466866	1	7.77399	9.76163	8.0625	8.2527
1423213_at	Plxnc1	plexin C1	54712	1.04141	2.05824	0.000307156	0.00387039	1	0.890869	1.85429	0.00129416	0.00930067	0	-0.473973	-1.38893	0.0584679	0.108225	0	8.89399	8.42001	9.46142	9.31088
1457385_at				-1.01816	-2.02533	0.000307591	0.00387198	-1	-1.1417	-2.20641	9.34879e-05	0.00161822	-1	0.96646	1.95404	0.000509077	0.00245843	0	2.40964	3.3761	2.35794	2.2344
1436442_at	Ptpn14	protein tyrosine phosphatase, non-receptor type 14	19250	1.15181	2.22192	0.00030783	0.00387238	1	1.37309	2.59026	4.72615e-05	0.0010447	1	-1.20201	-2.3006	0.000200193	0.00119042	-1	6.87224	5.67023	6.82203	7.04332
1451928_a_at	Rad18	RAD18 homolog (S. cerevisiae)	58186	-1.29738	-2.45782	0.000309918	0.00389252	-1	-0.999648	-1.99951	0.00303181	0.0167179	0	0.951246	1.93354	0.00438017	0.0134201	0	7.23935	8.19059	6.89322	7.19095
1442077_at	2310076G05Rik	RIKEN cDNA 2310076G05 gene	76963	-1.00374	-2.00519	0.000315772	0.00395161	-1	-1.00374	-2.00519	0.000315772	0.00352189	-1	1.00374	2.00519	0.000315772	0.00170438	1	2.01891	3.02264	2.01891	2.01891
1444257_at	Prr11	proline rich 11	270906	-1.10807	-2.15558	0.000315969	0.00395249	-1	-1.28182	-2.43145	6.83579e-05	0.00132465	-1	0.75132	1.68333	0.00760524	0.0209185	0	3.44624	4.19756	3.08948	2.91574
1424046_at	Bub1	budding uninhibited by benzimidazoles 1 homolog (S. cerevisiae)	12235	-1.48709	-2.80323	0.000318019	0.00397171	-1	-1.97374	-3.92784	1.37722e-05	0.000493275	-1	0.903532	1.87064	0.0149728	0.0361336	0	8.46386	9.3674	7.88031	7.39366
1446618_at	A130088B03Rik	RIKEN cDNA A130088B03 gene	432971	0.581206	1.4961	0.000318745	0.00397917	0	0.90933	1.87817	1.65461e-06	0.000138826	0	-1.26322	-2.40031	1.38917e-08	1.09159e-06	-1	12.1767	10.9135	11.4947	11.8228
1422940_x_at				-1.2971	-2.45735	0.000319207	0.00398012	-1	-1.41299	-2.66289	0.000132884	0.00204884	-1	4.65352	25.1681	3.70577e-12	3.91521e-09	1	7.34102	11.9945	10.6974	10.5815
1443212_at				0.989059	1.98489	0.000320955	0.0039889	0	1.01607	2.0224	0.000245299	0.00301624	1	-1.80318	-3.48989	1.95889e-07	6.81429e-06	-1	8.17402	6.37084	7.3599	7.3869
1439239_at	Lin7b	lin-7 homolog B (C. elegans)	22342	0.940801	1.91959	0.000321433	0.0039889	0	1.05854	2.08283	9.45746e-05	0.00163212	1	-0.599486	-1.51518	0.011381	0.0288791	0	8.00506	7.40557	8.34637	8.46412
1453431_at	2610206C17Rik	RIKEN cDNA 2610206C17 gene	72495	1.83082	3.55739	0.000321554	0.0039889	1	1.52901	2.88588	0.00164635	0.0109346	1	-1.14252	-2.20766	0.0128996	0.0319467	-1	3.72463	2.58211	4.41293	4.11112
1447575_at				0.952489	1.93521	0.000321562	0.0039889	0	0.758791	1.69207	0.00241035	0.0142467	0	-1.18405	-2.27213	3.06355e-05	0.000285513	-1	7.84169	6.65765	7.61014	7.41644
1456756_at	Zc3hav1l	zinc finger CCCH-type, antiviral 1-like	209032	0.594496	1.50995	0.000321726	0.00398905	0	0.638753	1.55698	0.000154971	0.00226316	0	-1.46391	-2.75855	1.97576e-09	2.69469e-07	-1	8.81174	7.34783	7.94233	7.98658
1434136_at	Tmem229a	transmembrane protein 229A	319832	1.27431	2.41882	0.000321968	0.00399045	1	1.81479	3.51808	5.78148e-06	0.000305335	1	-4.09069	-17.038	2.50054e-11	1.33477e-08	-1	8.04612	3.95544	5.22974	5.77022
1416309_at	Nusap1	nucleolar and spindle associated protein 1	108907	-0.963302	-1.94977	0.000326185	0.00403624	0	-1.36969	-2.58414	6.00145e-06	0.00030926	-1	0.890195	1.85343	0.000690277	0.00311621	0	10.5198	11.41	10.4467	10.0403
1451700_a_at	Get4	golgi to ER traffic protein 4 homolog (S. cerevisiae)	67604	-0.846293	-1.79787	0.000327733	0.00404971	0	-0.458661	-1.37427	0.027929	0.0823898	0	1.12533	2.18152	1.39753e-05	0.000156483	1	8.50744	9.63277	8.78648	9.17411
1451932_a_at	Adamtsl4	ADAMTS-like 4	229595	1.26119	2.39693	0.000327927	0.00404971	1	1.40725	2.6523	0.000105824	0.00177002	1	-1.75497	-3.3752	7.94745e-06	0.000102996	-1	8.91339	7.15841	8.4196	8.56566
1439695_a_at	Kif20b	kinesin family member 20B	240641	-1.11673	-2.16856	0.00032831	0.00405282	-1	-1.35851	-2.5642	4.03786e-05	0.000958181	-1	0.754501	1.68705	0.00798434	0.0217563	0	7.69178	8.44629	7.32955	7.08777
1452837_at	Lpin2	lipin 2	64898	-0.766236	-1.70083	0.000329837	0.00406518	0	-1.16414	-2.24099	2.56804e-06	0.000184718	-1	1.2322	2.34925	1.19429e-06	2.54301e-05	1	6.84483	8.07703	7.3108	6.9129
1427707_a_at	Stil	Scl/Tal1 interrupting locus	20460	-1.26226	-2.39872	0.000330673	0.00406555	-1	-1.31653	-2.49067	0.000216888	0.00279902	-1	0.882067	1.84301	0.00641539	0.0182037	0	4.52076	5.40283	4.14056	4.08629
1427284_a_at	Ttpa	tocopherol (alpha) transfer protein	50500	-2.40368	-5.29152	0.00033145	0.00406932	-1	-1.96683	-3.90907	0.00199539	0.0124601	-1	1.25808	2.39178	0.0331963	0.0683844	0	5.99694	7.25502	4.85134	5.28819
1421842_a_at				-1.15735	-2.23047	0.000331486	0.00406932	-1	-0.753174	-1.6855	0.0101945	0.0396708	0	0.672111	1.5934	0.019695	0.0450804	0	5.96136	6.63347	5.47612	5.88029
1423700_at	Rfc3	replication factor C (activator 1) 3	69263	-0.810354	-1.75364	0.00033176	0.00407087	0	-0.9612	-1.94693	5.45459e-05	0.0011437	0	1.05477	2.07739	1.83998e-05	0.000191945	1	8.39137	9.44615	8.63579	8.48495
1430150_at	Dcp2	DCP2 decapping enzyme homolog (S. cerevisiae)	70640	-2.11909	-4.3442	0.000333897	0.00409054	-1	-2.95337	-7.74559	7.97501e-06	0.000351218	-1	2.67707	6.39557	2.65036e-05	0.000255306	1	3.57414	6.25121	4.13212	3.29783
1459237_at				0.714127	1.64049	0.000335657	0.00409698	0	0.594386	1.50983	0.001755	0.0113889	0	-1.01139	-2.01585	6.55095e-06	8.91113e-05	-1	8.02715	7.01576	7.72989	7.61015
1429522_at	Ankrd42	ankyrin repeat domain 42	73845	-1.22752	-2.34165	0.000336062	0.00409948	-1	-1.1245	-2.18025	0.000768315	0.00646563	-1	0.79342	1.73318	0.0107242	0.0275393	0	4.77433	5.56775	4.34023	4.44326
1431322_at	Igsf3	immunoglobulin superfamily, member 3	78908	-1.82496	-3.54296	0.000338346	0.00412085	-1	-1.12435	-2.18004	0.0143306	0.0509915	0	1.26916	2.41021	0.00673164	0.0189317	1	7.26647	8.53562	6.71067	7.41127
1447271_at	Nck1	non-catalytic region of tyrosine kinase adaptor protein 1	17973	1.01711	2.02386	0.000346415	0.00419437	1	0.659305	1.57932	0.0107391	0.0413074	0	-0.210759	-1.1573	0.375886	0.474745	0	8.57975	8.36899	9.3861	9.0283
1441918_x_at	Serpinb6e	serine (or cysteine) peptidase inhibitor, clade B, member 6e	435350	2.08495	4.24261	0.00034718	0.00420139	1	1.57749	2.9845	0.0037893	0.0195365	1	-3.58759	-12.0219	5.01918e-07	1.3631e-05	-1	9.76475	6.17716	8.26211	7.75465
1442786_s_at	Rufy3	RUN and FYVE domain containing 3	52822	1.68313	3.21125	0.000347266	0.00420139	1	0.944001	1.92386	0.0242295	0.0742243	0	-0.825399	-1.77202	0.0453654	0.0880358	0	6.25209	5.42669	7.10982	6.37069
1415807_s_at	Srsf2	serine/arginine-rich splicing factor 2	20382	-1.09211	-2.13186	0.000348121	0.00421009	-1	-0.728721	-1.65717	0.00898955	0.0363337	0	0.80641	1.74885	0.00453267	0.0137891	0	9.07896	9.88537	8.79326	9.15665
1448271_a_at	Ddx21	DEAD (Asp-Glu-Ala-Asp) box polypeptide 21	56200	-0.972986	-1.9629	0.000350047	0.00422572	0	-0.81396	-1.75803	0.00174364	0.0113291	0	1.03076	2.0431	0.000196207	0.00117269	1	10.322	11.3528	10.3798	10.5388
1444300_at	Gpr125	G protein-coupled receptor 125	70693	0.857516	1.81192	0.000350242	0.00422572	0	1.04631	2.06524	4.20806e-05	0.000981839	1	-1.26053	-2.39583	4.29167e-06	6.50367e-05	-1	5.94042	4.6799	5.53741	5.72621
1449182_at	Retn	resistin	57264	1.08356	2.11926	0.000350412	0.00422572	1	1.21921	2.32819	0.000103998	0.00174704	1	-1.2467	-2.37298	8.15438e-05	0.000600522	-1	12.7223	11.4756	12.5592	12.6948
1448330_at	Gstm1	glutathione S-transferase, mu 1	14862	0.865424	1.82187	0.000350642	0.00422572	0	1.26052	2.39582	4.84103e-06	0.000272506	1	-1.19636	-2.29161	9.40581e-06	0.000115667	-1	12.6775	11.4812	12.3466	12.7417
1432361_a_at	Cenpp	centromere protein P	66336	-1.04778	-2.06734	0.000353256	0.00424895	-1	-1.37198	-2.58825	1.84961e-05	0.000583136	-1	1.13034	2.18911	0.000164114	0.00102171	1	8.14249	9.27283	8.22505	7.90085
1440178_x_at	Zap70	zeta-chain (TCR) associated protein kinase	22637	-1.03587	-2.05035	0.000356079	0.00427959	-1	-0.681866	-1.60421	0.00993623	0.0389844	0	1.21018	2.31366	7.01276e-05	0.000539684	1	6.05613	7.26631	6.23044	6.58444
1426753_at	Phf17	PHD finger protein 17	269424	1.0827	2.118	0.000356323	0.00427991	1	1.55476	2.93784	5.93454e-06	0.000308277	1	-1.45965	-2.75042	1.31044e-05	0.000149105	-1	6.78909	5.32944	6.41214	6.88419
1451478_at	Angptl7	angiopoietin-like 7	654812	1.55249	2.93323	0.000356382	0.00427991	1	1.89692	3.72416	4.22733e-05	0.000984921	1	-1.45359	-2.73889	0.000664984	0.0030223	-1	7.09737	5.64378	7.19627	7.5407
1439139_at	D2Ertd640e	DNA segment, Chr 2, ERATO Doi 640, expressed	51925	0.8414	1.79179	0.000358212	0.00429169	0	0.606649	1.52272	0.00547523	0.0253005	0	-1.03505	-2.04918	3.93382e-05	0.000347082	-1	8.44754	7.41249	8.25389	8.01914
1438100_at	B230208H17Rik	RIKEN cDNA B230208H17 gene	227624	1.20566	2.30644	0.000358322	0.00429169	1	1.06417	2.09096	0.00113159	0.00849825	1	-1.51767	-2.86327	3.01028e-05	0.000281565	-1	6.31965	4.80198	6.00765	5.86615
1426288_at	Lrp4	low density lipoprotein receptor-related protein 4	228357	0.76502	1.69939	0.000358334	0.00429169	0	1.00679	2.00944	1.77123e-05	0.000569677	1	-0.547719	-1.46177	0.00574933	0.016665	0	11.8772	11.3295	12.0945	12.3363
1452752_at	Lepre1	leprecan 1	56401	-1.25118	-2.38037	0.000358524	0.0042923	-1	-1.16072	-2.2357	0.000727548	0.00622579	-1	0.824385	1.77078	0.00992035	0.0258792	0	7.32567	8.15006	6.89887	6.98933
1422852_at	Cib2	calcium and integrin binding family member 2	56506	1.04278	2.06019	0.000360447	0.00431045	1	1.24668	2.37294	5.49072e-05	0.00114782	1	-1.62465	-3.08367	2.07202e-06	3.82984e-05	-1	9.67564	8.051	9.09377	9.29767
1454157_a_at	Pla2g2d	phospholipase A2, group IID	18782	-2.03548	-4.0996	0.000361638	0.0043179	-1	-2.09825	-4.2819	0.000267837	0.00319301	-1	0.878094	1.83795	0.0759197	0.133412	0	3.98496	4.86305	2.82757	2.7648
1443997_at	Gprin2	G protein regulated inducer of neurite outgrowth 2	432839	1.13164	2.19108	0.000362989	0.00433069	1	1.46666	2.76381	2.16371e-05	0.000642884	1	-0.41166	-1.33022	0.129902	0.204942	0	9.95343	9.54177	10.6734	11.0084
1448378_at	Fscn1	fascin homolog 1, actin bundling protein (Strongylocentrotus purpuratus)	14086	-1.07014	-2.09964	0.000364909	0.00434798	-1	-0.741036	-1.67138	0.00729271	0.031207	0	1.59403	3.01892	3.81569e-06	5.96334e-05	1	9.62947	11.2235	10.1534	10.4825
1417303_at	Mvd	mevalonate (diphospho) decarboxylase	192156	-1.21273	-2.31775	0.000365	0.00434798	-1	-0.252264	-1.19108	0.376585	0.536913	0	0.356134	1.27999	0.216729	0.306515	0	8.0778	8.43393	7.2212	8.18167
1437611_x_at	Kif2c	kinesin family member 2C	73804	-1.75359	-3.37197	0.000366681	0.00436632	-1	-1.93343	-3.81963	0.000135868	0.0020742	-1	1.69196	3.23095	0.000516649	0.00248532	1	6.87019	8.56215	6.80855	6.62872
1416416_x_at	Gstm1	glutathione S-transferase, mu 1	14862	0.855849	1.80982	0.000367179	0.00437058	0	1.26423	2.40199	4.28941e-06	0.000258274	1	-1.18783	-2.27809	9.49505e-06	0.000116469	-1	12.8663	11.6785	12.5343	12.9427
1437771_at	Lrrn4cl	LRRN4 C-terminal like	68852	2.20633	4.615	0.000371535	0.00440549	1	1.94936	3.86202	0.00115841	0.00862816	1	-1.25248	-2.38251	0.0235977	0.0521661	0	7.20721	5.95473	8.16106	7.90408
1449277_at	Ccl19	chemokine (C-C motif) ligand 19	24047	-1.64696	-3.13172	0.000371869	0.00440775	-1	-1.15051	-2.21993	0.00696926	0.0301142	-1	1.97424	3.92921	5.52455e-05	0.000449278	1	8.9481	10.9223	9.27539	9.77183
1459343_at	Heatr6	HEAT repeat containing 6	217026	1.27308	2.41677	0.000373715	0.00442286	1	1.41066	2.65859	0.000131561	0.00203656	1	-0.86482	-1.82111	0.00839818	0.022642	0	5.87782	5.013	6.28608	6.42366
1424468_s_at	Phldb1	pleckstrin homology-like domain, family B, member 1	102693	0.622913	1.53998	0.000374405	0.00442922	0	0.954432	1.93782	2.72565e-06	0.000193103	0	-1.41041	-2.65813	9.5012e-09	8.19379e-07	-1	10.6506	9.24015	9.86307	10.1946
1445377_at				0.804539	1.74659	0.000374538	0.00442922	0	1.22763	2.34182	2.88034e-06	0.000200394	1	-1.97926	-3.94291	2.57042e-09	3.27662e-07	-1	7.70496	5.7257	6.53024	6.95333
1451365_at	Rbm19	RNA binding motif protein 19	74111	-1.08661	-2.12374	0.000375086	0.00443231	-1	-0.811839	-1.75545	0.00440075	0.021737	0	0.968241	1.95645	0.00108531	0.00444341	0	6.65746	7.6257	6.53909	6.81386
1448810_at	Gne	glucosamine (UDP-N-acetyl)-2-epimerase/N-acetylmannosamine kinase	50798	-1.03609	-2.05067	0.00037717	0.00444962	-1	-0.705388	-1.63058	0.00833019	0.0344095	0	1.04662	2.06568	0.00034174	0.00181729	1	7.23881	8.28543	7.24933	7.58004
1436641_at	AI415730	expressed sequence AI415730	107166	0.857309	1.81166	0.000379093	0.00446772	0	0.586763	1.50187	0.00807731	0.0336747	0	-1.3757	-2.59494	1.49285e-06	2.99297e-05	-1	6.60062	5.22491	6.08222	5.81168
1418856_a_at	Fanca	Fanconi anemia, complementation group A	14087	-1.16238	-2.23827	0.000381685	0.00449144	-1	-1.25919	-2.39361	0.000170751	0.0024272	-1	1.11953	2.17276	0.000546157	0.00259381	1	7.57648	8.69601	7.53363	7.43683
1436533_at	Trove2	TROVE domain family, member 2	20822	1.28873	2.44312	0.000382622	0.00449904	1	0.768114	1.70304	0.018526	0.0613964	0	-1.17922	-2.26454	0.000874659	0.0037527	-1	7.08698	5.90776	7.19648	6.67587
1418213_at	Krt23	keratin 23	94179	1.35706	2.56162	0.000383151	0.00450265	1	1.75254	3.36952	2.41272e-05	0.000690368	1	-2.05538	-4.15653	3.27595e-06	5.31291e-05	-1	12.7716	10.7162	12.0733	12.4688
1438081_at	Mcc	mutated in colorectal cancers	328949	0.480729	1.39545	0.000384048	0.00451066	0	0.663615	1.58405	1.07571e-05	0.000419513	0	-1.05755	-2.0814	1.54672e-08	1.16796e-06	-1	10.9339	9.87635	10.3571	10.54
1425850_a_at	Nek6	NIMA (never in mitosis gene a)-related expressed kinase 6	59126	-1.84035	-3.58097	0.00038583	0.00452427	-1	-1.64495	-3.12736	0.00108362	0.00824294	-1	1.23824	2.35911	0.00911853	0.0242139	1	4.51745	5.7557	3.91535	4.11075
1435591_at	AI426330	expressed sequence AI426330	101563	0.922462	1.89535	0.00038589	0.00452427	0	1.33333	2.51984	6.06188e-06	0.00030926	1	-1.15479	-2.22651	3.50989e-05	0.000316996	-1	9.8238	8.66901	9.59148	10.0023
1428400_at	2200002K05Rik	RIKEN cDNA 2200002K05 gene	69137	-1.415	-2.6666	0.000386123	0.00452474	-1	-0.7737	-1.70965	0.0290336	0.084824	0	1.53733	2.90256	0.000167703	0.00103967	1	8.7466	10.2839	8.86892	9.51022
1428713_s_at	Gins2	GINS complex subunit 2 (Psf2 homolog)	272551	-0.936365	-1.9137	0.000387399	0.00453626	0	-1.03082	-2.04318	0.000146583	0.00217243	-1	1.09889	2.1419	7.3425e-05	0.000558947	1	7.92345	9.02235	8.08598	7.99153
1453141_at	0610009L18Rik	RIKEN cDNA 0610009L18 gene	66838	1.05007	2.07062	0.00038838	0.00454431	1	1.05365	2.07577	0.000375764	0.00395433	1	-0.589433	-1.50466	0.0255729	0.0555978	0	7.45593	6.8665	7.91657	7.92015
1418794_at	Cds2	CDP-diacylglycerol synthase (phosphatidate cytidylyltransferase) 2	110911	-1.02345	-2.03278	0.00038869	0.00454615	-1	-1.31726	-2.49193	2.55595e-05	0.000720037	-1	1.14825	2.21646	0.000120299	0.000812842	1	7.18073	8.32899	7.30553	7.01172
1429893_at	Il17rd	interleukin 17 receptor D	171463	1.09018	2.12901	0.000389225	0.00454615	1	1.28016	2.42866	7.334e-05	0.00138335	1	-1.68197	-3.20866	2.62254e-06	4.51579e-05	-1	8.5582	6.87623	7.96641	8.15639
1456001_at	Lce3a	late cornified envelope 3A	545548	-4.51282	-22.8294	0.000389392	0.00454615	-1	-4.14948	-17.7467	0.000851122	0.0069472	-1	8.98702	507.413	7.15313e-08	3.38576e-06	1	3.98763	12.9747	8.46183	8.82517
1426113_x_at	Trav9d-3	T cell receptor alpha variable 9D-3	100038850	-1.31806	-2.49331	0.000389709	0.00454782	-1	-0.97484	-1.96542	0.00486614	0.0233054	0	3.12735	8.73826	4.86837e-09	5.10932e-07	1	5.92656	9.0539	7.73584	8.07906
1426652_at	Mcm3	minichromosome maintenance deficient 3 (S. cerevisiae)	17215	-1.25885	-2.39305	0.000390221	0.00455209	-1	-1.34731	-2.54437	0.000198105	0.00264939	-1	1.25224	2.38211	0.000410576	0.00208521	1	8.08619	9.33843	8.07958	7.99113
1448862_at	Icam2	intercellular adhesion molecule 2	15896	-1.08461	-2.1208	0.000390419	0.00455268	-1	-0.902741	-1.86961	0.00199124	0.0124417	0	1.03792	2.05326	0.000592774	0.00275353	1	8.82165	9.85957	8.77496	8.95683
1416258_at	Tk1	thymidine kinase 1	21877	-1.24024	-2.36238	0.000390994	0.00455595	-1	-1.37401	-2.59189	0.000138506	0.0020969	-1	0.855486	1.80937	0.0078393	0.0214403	0	9.80337	10.6589	9.41861	9.28485
1431981_at	Hif1a	hypoxia inducible factor 1, alpha subunit	15251	-2.34524	-5.08144	0.000392951	0.00457359	-1	-2.17633	-4.52002	0.000790311	0.00659338	-1	1.92105	3.78699	0.00227502	0.00797944	1	4.36138	6.28243	3.9372	4.1061
1451236_at	Rerg	RAS-like, estrogen-regulated, growth-inhibitor	232441	1.29214	2.4489	0.000395589	0.00458448	1	1.62902	3.09303	3.33075e-05	0.000848725	1	-1.89396	-3.71655	5.23596e-06	7.51531e-05	-1	9.05217	7.1582	8.45034	8.78722
1460243_at	Sptlc2	serine palmitoyltransferase, long chain base subunit 2	20773	-0.503284	-1.41744	0.0003957	0.00458448	0	-0.608229	-1.52439	5.41702e-05	0.00113862	0	1.16472	2.2419	7.38375e-09	6.84182e-07	1	11.3412	12.5059	12.0026	11.8977
1455049_at	Igsf3	immunoglobulin superfamily, member 3	78908	-1.23292	-2.35043	0.000395811	0.00458448	-1	-0.465417	-1.38072	0.11997	0.236126	0	0.920662	1.89298	0.00459713	0.0139365	0	9.7965	10.7172	9.48423	10.2517
1448651_at	Nudt5	nudix (nucleoside diphosphate linked moiety X)-type motif 5	53893	-1.03509	-2.04924	0.000399759	0.00462156	-1	-1.36983	-2.5844	1.89717e-05	0.000592102	-1	1.19255	2.28557	9.31899e-05	0.000668171	1	9.88212	11.0747	10.0396	9.70485
1422400_a_at				-1.3675	-2.58023	0.000401237	0.00463519	-1	-1.3675	-2.58023	0.000401237	0.00412839	-1	1.36331	2.57274	0.000413306	0.00209529	1	2.0231	3.38641	2.01891	2.01891
1458374_at	Mis18bp1	MIS18 binding protein 1	217653	-1.12113	-2.17517	0.000401796	0.00463992	-1	-1.58938	-3.00919	8.17439e-06	0.000356952	-1	0.912193	1.8819	0.00244309	0.00842859	0	8.85282	9.76502	8.64389	8.17564
1427445_a_at	Ttn	titin	22138	1.1123	2.16189	0.000403105	0.00464955	1	1.32187	2.49989	6.68343e-05	0.00130466	1	-1.31296	-2.4845	7.20584e-05	0.000550407	-1	13.1155	11.8025	12.9148	13.1244
1429566_a_at	Hipk2	homeodomain interacting protein kinase 2	15258	-1.12905	-2.18715	0.000403652	0.00464955	-1	-0.769708	-1.70492	0.0086391	0.0353418	0	1.33936	2.53039	6.82995e-05	0.000528204	1	5.66559	7.00495	5.8759	6.23524
1419204_at	Dll1	delta-like 1 (Drosophila)	13388	0.835867	1.78493	0.000403834	0.00464955	0	1.30716	2.47454	2.30486e-06	0.000171534	1	-1.22497	-2.33751	5.39359e-06	7.6881e-05	-1	8.6007	7.37573	8.2116	8.68289
1438453_at	Rad51c	RAD51 homolog c (S. cerevisiae)	114714	-0.956996	-1.94126	0.000405938	0.0046628	0	-1.05726	-2.08097	0.000148605	0.00219191	-1	0.733002	1.66209	0.00389747	0.012228	0	2.57706	3.31006	2.35306	2.2528
1425252_a_at	Mad1l1	MAD1 mitotic arrest deficient 1-like 1	17120	-1.04604	-2.06486	0.000408795	0.00468404	-1	-0.361544	-1.2848	0.153682	0.28276	0	1.41302	2.66294	1.52142e-05	0.000166855	1	5.8924	7.30542	6.25938	6.94388
1456844_at	Camk2d	calcium/calmodulin-dependent protein kinase II, delta	108058	-0.883904	-1.84536	0.000409647	0.00468687	0	-0.808852	-1.75182	0.000930714	0.0073752	0	2.27147	4.82816	1.48246e-09	2.17522e-07	1	6.14064	8.41211	7.52821	7.60326
1448777_at	Mcm2	minichromosome maintenance deficient 2 mitotin (S. cerevisiae)	17216	-1.32693	-2.50868	0.000411189	0.00469911	-1	-1.25926	-2.39372	0.000672765	0.00590752	-1	0.846375	1.79798	0.0131577	0.0324799	0	9.00953	9.8559	8.52897	8.59665
1426863_at	Rbmx	RNA binding motif protein, X chromosome	19655	0.565759	1.48017	0.000411718	0.00470028	0	0.705305	1.63049	3.98081e-05	0.000951175	0	-1.0616	-2.08725	1.86828e-07	6.64088e-06	-1	11.2484	10.1868	10.7525	10.8921
1442311_at	Zfr	zinc finger RNA binding protein	22763	0.983001	1.97657	0.000411847	0.00470028	0	0.6808	1.60303	0.00790752	0.033173	0	-1.3722	-2.58866	1.0243e-05	0.000123	-1	9.47517	8.10296	9.08597	8.78376
1439348_at	S100a10	S100 calcium binding protein A10 (calpactin)	20194	1.75578	3.37709	0.000411942	0.00470028	1	1.00309	2.00429	0.0241217	0.0739633	0	-0.920719	-1.89306	0.0364835	0.0737724	0	8.76872	7.848	9.60378	8.85109
1432492_a_at	Haao	3-hydroxyanthranilate 3,4-dioxygenase	107766	-1.55254	-2.93334	0.000412054	0.00470028	-1	-0.733461	-1.66262	0.0568326	0.137185	0	0.49171	1.40611	0.189511	0.275924	0	4.24505	4.73676	3.18422	4.0033
1435284_at	Rtn4	reticulon 4	68585	1.00318	2.00442	0.000412677	0.00470032	1	0.56133	1.47563	0.0268115	0.0800612	0	-1.28179	-2.43141	2.99698e-05	0.000280576	-1	9.33654	8.05474	9.05793	8.61607
1415945_at	Mcm5	minichromosome maintenance deficient 5, cell division cycle 46 (S. cerevisiae)	17218	-1.64825	-3.13452	0.000412728	0.00470032	-1	-1.70879	-3.26886	0.000289911	0.00334164	-1	1.43987	2.71297	0.00140013	0.00545147	1	8.29162	9.7315	8.08325	8.02271
1443648_at	9530003O04Rik	RIKEN cDNA 9530003O04 gene	77391	1.4263	2.68757	0.000412984	0.00470032	1	1.53109	2.89003	0.000204064	0.0027047	1	-2.03825	-4.10747	7.65956e-06	0.000100076	-1	6.85742	4.81916	6.24546	6.35025
1457169_at				0.814385	1.75855	0.0004131	0.00470032	0	0.918995	1.8908	0.000120969	0.00192556	0	-1.20166	-2.30005	5.09202e-06	7.3496e-05	-1	7.01888	5.81721	6.6316	6.73621
1434239_at	Rrp12	ribosomal RNA processing 12 homolog (S. cerevisiae)	107094	-1.09759	-2.13998	0.000415619	0.00472551	-1	-0.908349	-1.8769	0.00219579	0.0133585	0	0.74254	1.67312	0.00924861	0.0244942	0	8.12961	8.87214	7.77455	7.9638
1438698_at	Tmem132c	transmembrane protein 132C	208213	1.63103	3.09734	0.000425515	0.00482532	1	2.21316	4.63691	1.51521e-05	0.00052139	1	-2.32717	-5.01821	8.1248e-06	0.000104549	-1	9.38665	7.05947	8.6905	9.27264
1455925_at	Prdm8	PR domain containing 8	77630	1.7763	3.42546	0.000425744	0.00482532	1	1.91791	3.77875	0.000198592	0.00265246	1	-2.08732	-4.24958	8.0644e-05	0.00059673	-1	6.53638	4.44906	6.22536	6.36697
1426580_at	Plk4	polo-like kinase 4 (Drosophila)	20873	-1.01231	-2.01714	0.000426631	0.00482591	-1	-1.24916	-2.37703	4.67109e-05	0.00103537	-1	0.775669	1.71198	0.00403626	0.0125561	0	7.49607	8.27174	7.25943	7.02258
1422428_at	Acsbg1	acyl-CoA synthetase bubblegum family member 1	94180	0.951888	1.9344	0.00042747	0.00483363	0	1.37156	2.5875	7.22052e-06	0.00033266	1	-1.283	-2.43344	1.65375e-05	0.000177373	-1	12.1009	10.8179	11.7698	12.1894
1452928_at	Abi3	ABI gene family, member 3	66610	-1.21225	-2.31698	0.000431462	0.00486455	-1	-1.26663	-2.40599	0.00028083	0.00327723	-1	3.77617	13.7007	6.87757e-11	2.3913e-08	1	5.5071	9.28328	8.07103	8.01665
1423525_at	Mastl	microtubule associated serine/threonine kinase-like	67121	-1.53351	-2.89489	0.000431639	0.00486478	-1	-1.65364	-3.14626	0.000204213	0.0027047	-1	1.61135	3.05538	0.000265564	0.00148479	1	7.21887	8.83022	7.29671	7.17659
1438441_at				1.20944	2.31248	0.000433651	0.00487504	1	1.59533	3.02164	2.18431e-05	0.000645288	1	-1.36189	-2.57022	0.000130594	0.00086541	-1	11.5937	10.2318	11.4412	11.8271
1451326_at	Abhd14b	abhydrolase domain containing 14b	76491	0.910078	1.87915	0.000434393	0.00488032	0	1.16239	2.23828	3.20467e-05	0.000829077	1	-1.3619	-2.57023	4.54217e-06	6.76735e-05	-1	10.8572	9.49532	10.4054	10.6577
1445651_at				-0.693189	-1.61685	0.000434903	0.00488239	0	-1.00659	-2.00916	6.6935e-06	0.000320414	-1	2.05712	4.16156	1.56311e-10	4.06672e-08	1	8.36433	10.4215	9.72827	9.41487
1423017_a_at	Il1rn	interleukin 1 receptor antagonist	16181	-0.990369	-1.98669	0.000434937	0.00488239	0	-1.47345	-2.77685	4.90554e-06	0.00027365	-1	2.08197	4.23384	3.7705e-08	2.14192e-06	1	7.5871	9.66907	8.6787	8.19562
1429170_a_at	Mtf1	metal response element binding transcription factor 1	17764	-0.553931	-1.46808	0.00043559	0.00488619	0	-0.589108	-1.50432	0.000237453	0.00296228	0	1.16285	2.239	3.86022e-08	2.16508e-06	1	7.90025	9.0631	8.50917	8.47399
1421172_at	Adam12	a disintegrin and metallopeptidase domain 12 (meltrin alpha)	11489	-1.55854	-2.94556	0.000440373	0.00492912	-1	-1.57214	-2.97345	0.00040511	0.00415367	-1	0.837176	1.78655	0.0337195	0.0692645	0	9.68441	10.5216	8.96305	8.94945
1436186_at	E2f8	E2F transcription factor 8	108961	-1.14656	-2.21385	0.000441624	0.00493777	-1	-0.906571	-1.87458	0.00328399	0.0176791	0	0.590634	1.50591	0.0408172	0.0808303	0	8.71224	9.30288	8.15632	8.3963
1458765_at	Rbm10	RNA binding motif protein 10	236732	0.876485	1.8359	0.000445893	0.00496493	0	1.33653	2.52543	3.68476e-06	0.000235738	1	-1.86933	-3.65362	3.15178e-08	1.90957e-06	-1	7.39277	5.52344	6.39992	6.85997
1433972_at	Camta1	calmodulin binding transcription activator 1	100072	0.765546	1.70001	0.000445977	0.00496493	0	1.32031	2.49719	6.985e-07	8.31714e-05	1	-1.35404	-2.55627	4.90444e-07	1.34254e-05	-1	10.7611	9.4071	10.1726	10.7274
1440924_at	Kif20b	kinesin family member 20B	240641	-1.53347	-2.89481	0.000448146	0.00498037	-1	-1.95128	-3.86717	3.47768e-05	0.000871814	-1	0.972084	1.96167	0.0143733	0.0349347	0	8.53609	9.50817	7.9747	7.55689
1421003_at	Gmeb1	glucocorticoid modulatory element binding protein 1	56809	-0.834595	-1.78336	0.000448169	0.00498037	0	-0.953194	-1.93615	0.000116482	0.00188515	0	1.24808	2.37525	4.78034e-06	7.00754e-05	1	2.61864	3.86672	3.03213	2.91353
1435207_at	Dixdc1	DIX domain containing 1	330938	1.06736	2.0956	0.000449415	0.00499064	1	1.67813	3.20012	2.48953e-06	0.000181355	1	-2.07722	-4.21993	1.25331e-07	5.04583e-06	-1	8.52184	6.44462	7.51198	8.12275
1438910_a_at	Stom	stomatin	13830	-0.769767	-1.70499	0.000450507	0.00499918	0	-0.76153	-1.69529	0.000499012	0.00479349	0	1.18723	2.27715	3.21947e-06	5.24053e-05	1	12.2281	13.4154	12.6456	12.6538
1437397_at	Prlr	prolactin receptor	19116	1.14839	2.21667	0.000452466	0.00501218	1	1.59027	3.01105	1.27749e-05	0.000473102	1	-1.6726	-3.18789	6.79136e-06	9.15768e-05	-1	10.2209	8.54834	9.69673	10.1386
1458447_at	Cenpf	centromere protein F	108000	-1.64406	-3.12544	0.000458798	0.00506215	-1	-1.90712	-3.7506	0.000101144	0.00170929	-1	0.662945	1.58331	0.103093	0.170628	0	7.43154	8.09449	6.45043	6.18737
1416823_a_at	Osbpl1a	oxysterol binding protein-like 1A	64291	0.666314	1.58701	0.000460552	0.00507607	0	1.00131	2.00181	4.65661e-06	0.000265996	1	-0.450028	-1.36607	0.00999526	0.0260117	0	9.14584	8.69581	9.36212	9.69712
1418662_at	2210012G02Rik	RIKEN cDNA 2210012G02 gene	66526	-0.689677	-1.61292	0.000462685	0.00508859	0	-0.715185	-1.64169	0.000325447	0.00358571	0	1.20088	2.29881	6.45025e-07	1.63823e-05	1	6.84111	8.04199	7.35232	7.32681
1453748_a_at	Kif23	kinesin family member 23	71819	-1.30131	-2.46453	0.000462839	0.00508859	-1	-1.57571	-2.98082	6.36963e-05	0.00126332	-1	0.735367	1.66482	0.0270939	0.0581629	0	7.90728	8.64265	7.34133	7.06694
1444811_at	Sec62	SEC62 homolog (S. cerevisiae)	69276	0.913892	1.88412	0.000463705	0.0050961	0	0.783741	1.72159	0.00180622	0.0115946	0	-1.0225	-2.03144	0.000150519	0.00095886	-1	7.92642	6.90392	7.81781	7.68766
1436520_at	Ahnak2	AHNAK nucleoprotein 2	100041194	0.804259	1.74625	0.000464015	0.0050961	0	1.00225	2.00312	4.61487e-05	0.00102889	1	-0.785012	-1.72311	0.000582918	0.0027204	0	12.0584	11.2734	12.0776	12.2756
1422008_a_at	Aqp3	aquaporin 3	11828	-1.1368	-2.19893	0.000466407	0.00511874	-1	-1.02876	-2.04027	0.00115502	0.00861405	-1	1.33911	2.52994	8.71899e-05	0.000634705	1	11.5419	12.8811	11.7443	11.8523
1448842_at	Cdo1	cysteine dioxygenase 1, cytosolic	12583	1.33141	2.51648	0.000468336	0.005129	1	1.36435	2.5746	0.000370171	0.00390876	1	-2.13443	-4.39064	2.03392e-06	3.78723e-05	-1	11.8634	9.72901	11.0604	11.0934
1421934_at	Cbx5	chromobox homolog 5 (Drosophila HP1a)	12419	-0.863251	-1.81913	0.000468794	0.00513158	0	-1.09862	-2.1415	3.66729e-05	0.000903662	-1	0.289465	1.22219	0.171427	0.254539	0	8.34858	8.63805	7.7748	7.53942
1460256_at	Car3	carbonic anhydrase 3	12350	0.791749	1.73117	0.000469541	0.00513158	0	0.988117	1.98359	4.60252e-05	0.00102735	0	-1.27538	-2.42063	1.91423e-06	3.62615e-05	-1	13.7228	12.4474	13.2392	13.4356
1424724_a_at	D16Ertd472e	DNA segment, Chr 16, ERATO Doi 472, expressed	67102	-0.907847	-1.87624	0.000469553	0.00513158	0	-0.993086	-1.99044	0.000192968	0.00261686	0	1.68074	3.20592	2.7661e-07	8.79246e-06	1	7.73063	9.41136	8.50352	8.41828
1439543_at	1110064A23Rik	RIKEN cDNA 1110064A23 gene	68893	1.24136	2.36421	0.000469566	0.00513158	1	2.11388	4.32853	8.98108e-07	9.6883e-05	1	-1.60197	-3.03558	3.12431e-05	0.00028976	-1	9.39319	7.79122	9.03258	9.90509
1439037_at	Ddx17	DEAD (Asp-Glu-Ala-Asp) box polypeptide 17	67040	0.642502	1.56103	0.000470792	0.00513954	0	0.504949	1.41907	0.00361299	0.0189045	0	-1.00995	-2.01384	2.66308e-06	4.56528e-05	-1	10.1404	9.13042	9.77292	9.63536
1422264_s_at	Klf9	Kruppel-like factor 9	16601	1.23912	2.36055	0.000471096	0.00514104	1	1.09856	2.14141	0.0013891	0.00975648	1	-1.03466	-2.04862	0.00227003	0.00796557	-1	4.26418	3.22952	4.46864	4.32808
1427169_at	Pard3b	par-3 partitioning defective 3 homolog B (C. elegans)	72823	1.30797	2.47592	0.000472171	0.00514485	1	1.86389	3.63988	9.46262e-06	0.000390097	1	-2.96426	-7.80425	1.36201e-08	1.07846e-06	-1	8.83364	5.86938	7.17734	7.73327
1449500_at	Serpinb7	serine (or cysteine) peptidase inhibitor, clade B, member 7	116872	1.35154	2.55184	0.000472276	0.00514485	1	1.03635	2.05103	0.00433728	0.021525	1	-1.37121	-2.58688	0.000411257	0.00208833	-1	11.3367	9.9655	11.317	11.0019
1455538_at	6330403M23Rik	RIKEN cDNA 6330403M23 gene	109169	0.616662	1.53332	0.000472518	0.00514567	0	0.408845	1.32762	0.0113887	0.0431122	0	-1.03405	-2.04776	1.12022e-06	2.44584e-05	-1	10.8913	9.85727	10.4739	10.2661
1416121_at	Lox	lysyl oxidase	16948	-1.11625	-2.16783	0.000475349	0.00516626	-1	-0.991593	-1.98838	0.00137699	0.00968931	0	0.749061	1.6807	0.0106194	0.0273185	0	11.6401	12.3891	11.2729	11.3975
1416927_at	Trp53inp1	transformation related protein 53 inducible nuclear protein 1	60599	1.04842	2.06826	0.000475527	0.00516626	1	0.950084	1.93198	0.00116165	0.00864536	0	-1.00303	-2.0042	0.000717944	0.00321626	-1	8.80421	7.80119	8.84961	8.75127
1419481_at	Sell	selectin, lymphocyte	20343	-2.97326	-7.85311	0.000475546	0.00516626	-1	-3.68974	-12.904	4.98496e-05	0.00107589	-1	6.78714	110.442	1.23228e-08	1.00135e-06	1	4.40628	11.1934	8.22016	7.50368
1460290_at	Lpin2	lipin 2	64898	-0.801188	-1.74254	0.000477118	0.00517755	0	-0.734586	-1.66392	0.0010526	0.00807242	0	1.06136	2.0869	2.33873e-05	0.000232074	1	6.16996	7.23132	6.43014	6.49674
1441375_at				0.977647	1.96925	0.000477738	0.00517999	0	1.10646	2.15316	0.000137846	0.00209304	1	-1.64639	-3.1305	1.07323e-06	2.37168e-05	-1	9.52419	7.87779	8.85544	8.98425
1424374_at	Gimap4	GTPase, IMAP family member 4	107526	-1.32634	-2.50766	0.000477764	0.00517999	-1	-1.31481	-2.4877	0.000518907	0.00492048	-1	3.03271	8.18344	1.21011e-08	9.85921e-07	1	7.6454	10.6781	9.35177	9.3633
1423024_at				1.61297	3.05881	0.0004786	0.00518456	1	-0.648354	-1.56738	0.105544	0.215283	0	1.17965	2.26522	0.00610582	0.0174952	1	3.26402	4.44368	6.05665	3.79532
1460742_at	Alg3	asparagine-linked glycosylation 3 homolog (yeast, alpha-1,3-mannosyltransferase)	208624	-1.02624	-2.03671	0.000480128	0.00519929	-1	-0.724164	-1.65194	0.00777151	0.0327355	0	0.521731	1.43568	0.0448962	0.0873271	0	8.36389	8.88563	7.85938	8.16146
1448326_a_at	Crabp1	cellular retinoic acid binding protein I	12903	-1.13552	-2.19697	0.000480923	0.00520607	-1	-1.18307	-2.27059	0.000323407	0.00357468	-1	0.614569	1.5311	0.0339857	0.069682	0	11.4082	12.0228	10.8873	10.8397
1440682_at				0.741289	1.67167	0.000481843	0.00521371	0	0.440611	1.35718	0.0213856	0.0682436	0	-1.26681	-2.40628	8.87836e-07	2.06318e-05	-1	9.10065	7.83385	8.57514	8.27446
1440072_at	E430022K19Rik	RIKEN cDNA E430022K19 gene	320086	1.14647	2.21372	0.000483864	0.00522877	1	0.788281	1.72702	0.0092312	0.0369965	0	0.0991254	1.07112	0.718719	0.788221	0	3.66699	3.76612	4.91259	4.5544
1457373_at				1.22798	2.34239	0.0004842	0.00522956	1	2.01947	4.05435	1.5123e-06	0.000131151	1	-2.46353	-5.51565	8.98761e-08	3.97887e-06	-1	6.77131	4.30778	5.53576	6.32725
1423318_at	Rad18	RAD18 homolog (S. cerevisiae)	58186	-1.63824	-3.11286	0.000484365	0.00522956	-1	-1.32701	-2.50883	0.00294244	0.0164108	-1	1.80544	3.49535	0.00018484	0.00111923	1	7.21399	9.01943	7.38119	7.69242
1448649_at	Enpep	glutamyl aminopeptidase	13809	2.00354	4.00982	0.000487563	0.00525407	1	1.56929	2.96758	0.00380687	0.019601	1	-3.76029	-13.5507	2.40571e-07	7.9235e-06	-1	9.40304	5.64275	7.64629	7.21204
1431856_a_at	C1qtnf6	C1q and tumor necrosis factor related protein 6	72709	-1.04217	-2.05933	0.000491399	0.00528621	-1	-1.10359	-2.14888	0.0002816	0.00328031	-1	0.665492	1.58611	0.0145719	0.0353425	0	8.95528	9.62077	8.57859	8.51718
1432013_a_at	Fam54a	family with sequence similarity 54, member A	71804	-1.1296	-2.18798	0.00049278	0.00529738	-1	-1.42674	-2.68838	4.25321e-05	0.000987102	-1	0.890784	1.85418	0.003651	0.0116172	0	5.43566	6.32644	5.19685	4.8997
1452284_at	Ptprz1	protein tyrosine phosphatase, receptor type Z, polypeptide 1	19283	-1.1376	-2.20014	0.000496119	0.00532557	-1	-1.21106	-2.31507	0.000269731	0.00320817	-1	2.38648	5.22882	4.79309e-08	2.54535e-06	1	6.80868	9.19516	8.05757	7.98411
1448889_at	Slc38a4	solute carrier family 38, member 4	69354	-1.25154	-2.38095	0.00049695	0.00532557	-1	-0.47711	-1.39195	0.124855	0.243142	0	0.126732	1.09182	0.674221	0.750465	0	6.46266	6.58939	5.33785	6.11228
1444111_at				-0.856901	-1.81114	0.000497489	0.00532766	0	-0.711993	-1.63807	0.0024694	0.0144934	0	1.50362	2.83554	6.44292e-07	1.63771e-05	1	7.79461	9.29823	8.44133	8.58624
1418206_at	Sdf2l1	stromal cell-derived factor 2-like 1	64136	-1.05779	-2.08174	0.000497931	0.00533054	-1	-1.45351	-2.73874	1.58898e-05	0.000537649	-1	0.855921	1.80991	0.00303335	0.0100013	0	9.54643	10.4024	9.34456	8.94884
1447655_x_at	Sox6	SRY-box containing gene 6	20679	1.39156	2.62362	0.000498435	0.00533226	1	1.47095	2.77204	0.000290943	0.0033473	1	-0.862813	-1.81858	0.0173545	0.0407012	0	6.26475	5.40194	6.7935	6.87288
1437492_at	Mkx	mohawk homeobox	210719	1.15994	2.23448	0.000498888	0.00533341	1	1.49732	2.82317	3.35536e-05	0.000853592	1	-1.17684	-2.2608	0.000434704	0.00217844	-1	9.60802	8.43118	9.59112	9.9285
1449570_at	Klrb1c	killer cell lectin-like receptor subfamily B member 1C	17059	-1.89824	-3.72757	0.000500206	0.00534382	-1	-1.65795	-3.15568	0.00165943	0.0109754	-1	4.45786	21.976	8.6121e-09	7.63984e-07	1	4.12738	8.58524	6.68701	6.92729
1458119_at	Slc25a27	solute carrier family 25, member 27	74011	1.42514	2.6854	0.000500827	0.0053486	1	1.84588	3.59473	3.24098e-05	0.000834783	1	-2.38249	-5.21436	1.26988e-06	2.65286e-05	-1	8.63101	6.24852	7.67366	8.0944
1455162_at	Ttc39a	tetratricopeptide repeat domain 39A	230603	-1.19752	-2.29346	0.000501366	0.00535067	-1	-0.828598	-1.77596	0.00908236	0.0366085	0	1.8207	3.53252	4.49559e-06	6.72384e-05	1	7.70675	9.52745	8.32992	8.69885
1423402_at	Creb1	cAMP responsive element binding protein 1	12912	-0.626949	-1.5443	0.000501615	0.00535148	0	-0.631527	-1.5492	0.000468168	0.00458977	0	1.03549	2.0498	1.50071e-06	3.00204e-05	1	8.8441	9.87959	9.25264	9.24806
1420136_a_at				0.938354	1.91634	0.000502582	0.00535626	0	0.744878	1.67583	0.00353025	0.0185911	0	-1.78998	-3.45809	1.99237e-07	6.88434e-06	-1	9.11114	7.32117	8.25952	8.06605
1459646_at	Hs3st6	heparan sulfate (glucosamine) 3-O-sulfotransferase 6	328779	1.63298	3.10154	0.000502755	0.00535626	1	2.21018	4.62734	1.93235e-05	0.000598257	1	-2.82537	-7.08798	7.96046e-07	1.92243e-05	-1	9.47	6.64462	8.27761	8.85481
1435389_at	Reps2	RALBP1 associated Eps domain containing protein 2	194590	2.2533	4.76773	0.000502947	0.00535647	1	1.68214	3.20905	0.00549579	0.0253652	1	-1.48364	-2.79653	0.0123525	0.0308639	-1	8.96878	7.48515	9.73845	9.16729
1453747_at	2810021J22Rik	RIKEN cDNA 2810021J22 gene	69944	0.548915	1.46299	0.000504345	0.00536581	0	0.650875	1.57012	8.87836e-05	0.00156356	0	-1.09106	-2.13031	1.0982e-07	4.62588e-06	-1	7.69262	6.60156	7.15048	7.25243
1454827_at	Pogz	pogo transposable element with ZNF domain	229584	0.739577	1.66969	0.000505997	0.00537416	0	0.922236	1.89505	5.08364e-05	0.0010887	0	-1.58334	-2.99663	3.64053e-08	2.08338e-06	-1	6.67414	5.0908	5.83037	6.01303
1427677_a_at	Sox6	SRY-box containing gene 6	20679	1.15141	2.22131	0.000506497	0.00537577	1	1.28946	2.44437	0.000164299	0.00237142	1	-0.619414	-1.53625	0.0358421	0.0727176	0	9.01344	8.39402	9.54543	9.68349
1458902_at				-0.78873	-1.72755	0.000506891	0.00537578	0	-0.945717	-1.92615	7.90152e-05	0.00144915	0	1.06874	2.0976	1.92592e-05	0.00019902	1	2.57574	3.64448	2.85575	2.69876
1421709_a_at	Fmo5	flavin containing monooxygenase 5	14263	1.27038	2.41225	0.000507227	0.00537578	1	1.59223	3.01516	4.81115e-05	0.00105491	1	-0.934534	-1.91127	0.00611845	0.0175217	0	5.27409	4.33955	5.60994	5.93179
1418889_a_at	Csnk1d	casein kinase 1, delta	104318	-0.640437	-1.5588	0.00050727	0.00537578	0	-0.458024	-1.37366	0.00739296	0.0315314	0	1.17821	2.26295	3.40217e-07	1.02562e-05	1	8.75111	9.92932	9.28888	9.4713
1423250_a_at	Tgfb2	transforming growth factor, beta 2	21808	1.68237	3.20954	0.000508065	0.00537735	1	1.75608	3.37779	0.00033619	0.00366108	1	-1.82738	-3.54893	0.00022586	0.00130776	-1	8.30805	6.48067	8.16304	8.23675
1423331_a_at	Pvrl3	poliovirus receptor-related 3	58998	1.54779	2.92369	0.000508382	0.00537735	1	0.861463	1.81688	0.0306173	0.0882189	0	-3.72011	-13.1785	6.15425e-09	5.99168e-07	-1	9.53572	5.81561	7.3634	6.67708
1427391_a_at	Col12a1	collagen, type XII, alpha 1	12816	-1.61376	-3.06048	0.000510014	0.00538909	-1	-1.46863	-2.76759	0.00119354	0.00881561	-1	1.26319	2.40026	0.0039606	0.0123834	1	2.82904	4.09223	2.47847	2.6236
1425854_x_at				-0.759647	-1.69308	0.000512011	0.0054065	0	-0.708276	-1.63385	0.000969992	0.00758741	0	1.50361	2.83552	1.19582e-07	4.90364e-06	1	10.8259	12.3295	11.5699	11.6213
1439795_at	Gpr64	G protein-coupled receptor 64	237175	1.32247	2.50094	0.000512849	0.0054135	1	1.45296	2.73769	0.000203045	0.00269682	1	-2.56855	-5.93214	1.58185e-07	5.89237e-06	-1	7.54787	4.97932	6.30179	6.43228
1453632_at	4930538K18Rik	RIKEN cDNA 4930538K18 gene	75180	-1.85668	-3.62174	0.000513591	0.00541751	-1	-1.50755	-2.84326	0.00302939	0.0167148	-1	3.61359	12.2405	1.53824e-07	5.78663e-06	1	4.10863	7.72222	5.86553	6.21467
1434381_at	Atmin	ATM interactor	234776	-0.822186	-1.76808	0.00051366	0.00541751	0	-0.462155	-1.3776	0.029347	0.0855378	0	1.09128	2.13063	2.50788e-05	0.000244471	1	7.21183	8.30311	7.48093	7.84096
1449227_at	Ch25h	cholesterol 25-hydroxylase	12642	-2.08512	-4.24309	0.000514037	0.00541751	-1	-2.01041	-4.02896	0.000720895	0.00618423	-1	1.4473	2.72697	0.00905314	0.0240691	1	3.21471	4.66201	2.57689	2.6516
1432605_at				-1.06406	-2.09081	0.00051404	0.00541751	-1	-0.983409	-1.97713	0.00105177	0.0080681	0	0.578477	1.49327	0.0343936	0.07036	0	4.45411	5.03259	3.96853	4.04918
1416019_at	Dr1	down-regulator of transcription 1	13486	-0.897647	-1.86302	0.000514278	0.00541751	0	-1.18669	-2.2763	2.63332e-05	0.000734482	-1	0.752872	1.68514	0.0023581	0.00820118	0	5.7353	6.48818	5.59053	5.30148
1452458_s_at	Lrr1	leucine rich repeat protein 1	69706	-2.30575	-4.94425	0.000515325	0.00542133	-1	-2.3448	-5.0799	0.000439322	0.00439464	-1	1.64436	3.12609	0.00761486	0.0209356	1	2.958	4.60236	2.29661	2.25756
1424031_at	Snx11	sorting nexin 11	74479	-0.964935	-1.95198	0.000515568	0.00542187	0	-0.497381	-1.41165	0.043703	0.113799	0	2.15535	4.45477	1.96504e-08	1.37642e-06	1	5.148	7.30335	6.33842	6.80597
1418264_at	Cenpk	centromere protein K	60411	-0.877301	-1.83694	0.000516044	0.00542282	0	-1.28269	-2.43293	7.71019e-06	0.000346959	-1	0.599405	1.51509	0.0100241	0.0260774	0	8.91578	9.51519	8.63789	8.23249
1434191_at	Agmo	alkylglycerol monooxygenase	319660	1.29267	2.44981	0.000516369	0.00542293	1	0.602555	1.5184	0.0655498	0.152302	0	-1.42156	-2.67876	0.000202586	0.00120108	-1	8.79305	7.37148	8.66415	7.97404
1442187_at	Bdkrb2	bradykinin receptor, beta 2	12062	-1.73477	-3.32826	0.000516741	0.005425	-1	-1.28012	-2.4286	0.00607118	0.027253	-1	1.36456	2.57498	0.00386036	0.0121398	1	3.44524	4.8098	3.07503	3.52968
1451642_at	Kif1b	kinesin family member 1B	16561	0.747684	1.67909	0.000517123	0.00542535	0	0.848138	1.80018	0.000146982	0.00217626	0	-1.29359	-2.45136	8.30146e-07	1.9653e-05	-1	9.56349	8.2699	9.01759	9.11804
1455431_at	Slc5a1	solute carrier family 5 (sodium/glucose cotransporter), member 1	20537	-0.90325	-1.87027	0.00051834	0.00543256	0	-1.05389	-2.07612	0.000109157	0.00180625	-1	3.4131	10.6524	3.60444e-12	3.91521e-09	1	8.32122	11.7343	10.8311	10.6804
1433529_at	Pamr1	peptidase domain containing associated with muscle regeneration 1	210622	2.31571	4.97848	0.000522312	0.00546864	1	2.42231	5.3603	0.00033886	0.00367851	1	-1.64965	-3.13758	0.00774176	0.021211	-1	10.1239	8.47423	10.7899	10.8965
1417748_x_at	Foxm1	forkhead box M1	14235	-1.55773	-2.9439	0.000522662	0.00547046	-1	-1.27397	-2.41825	0.00290784	0.0162695	-1	0.431112	1.34827	0.260404	0.353927	0	6.82456	7.25567	5.69794	5.98171
1425359_at	Mall	mal, T cell differentiation protein-like	228576	-1.43263	-2.69939	0.000526852	0.00550687	-1	-0.849018	-1.80127	0.0228183	0.0712079	0	1.49449	2.81765	0.000351207	0.00185173	1	7.32814	8.82264	7.39001	7.97362
1449949_a_at	Cxadr	coxsackie virus and adenovirus receptor	13052	-1.17519	-2.25823	0.00052895	0.00552094	-1	-0.746813	-1.67808	0.0156631	0.0543398	0	2.57772	5.96994	2.7052e-08	1.71274e-06	1	7.19482	9.77254	8.59734	9.02572
1438033_at	Tef	thyrotroph embryonic factor	21685	1.55317	2.93462	0.000529091	0.00552094	1	1.92158	3.78838	5.86299e-05	0.00119975	1	-0.420542	-1.33843	0.271116	0.365168	0	7.15283	6.73229	8.28546	8.65387
1438881_at	Vezt	vezatin, adherens junctions transmembrane protein	215008	1.2742	2.41865	0.000533609	0.00555962	1	0.335787	1.26207	0.284133	0.439202	0	-0.582767	-1.49772	0.0712217	0.126864	0	3.24382	2.66105	3.93526	2.99684
1442842_at	Hspbap1	Hspb associated protein 1	66667	1.05506	2.07781	0.000533874	0.00555962	1	0.457319	1.37299	0.0859469	0.185197	0	0.188546	1.13961	0.463837	0.561743	0	5.44549	5.63403	6.6891	6.09135
1448650_a_at	Pole	polymerase (DNA directed), epsilon	18973	-1.20927	-2.31221	0.000534149	0.00556061	-1	-1.189	-2.27994	0.000625309	0.00561309	-1	0.752745	1.685	0.0176842	0.0413304	0	8.69921	9.45195	8.24268	8.26296
1452829_at	Cad	carbamoyl-phosphate synthetase 2, aspartate transcarbamylase, and dihydroorotase	69719	-1.83232	-3.5611	0.000534953	0.00556711	-1	-1.16041	-2.23521	0.0160788	0.0553417	0	0.357299	1.28103	0.42485	0.523558	0	8.6319	8.98919	7.15687	7.82878
1449087_at	Rnf141	ring finger protein 141	67150	-1.14735	-2.21507	0.00053578	0.00557197	-1	-1.7373	-3.3341	5.1911e-06	0.000285152	-1	1.19654	2.2919	0.000358437	0.00188025	1	6.19596	7.39251	6.24515	5.65521
1420066_s_at	Cd160	CD160 antigen	54215	-2.09734	-4.27919	0.000536868	0.00557668	-1	-2.21482	-4.64225	0.00031764	0.00353238	-1	2.82598	7.09097	2.21695e-05	0.000222485	1	2.17657	5.00255	2.90521	2.78773
1459712_at	Zfp182	zinc finger protein 182	319535	1.18315	2.27072	0.000537474	0.00557833	1	0.507824	1.4219	0.0890271	0.19001	0	-0.788906	-1.72776	0.0119479	0.0300397	0	6.82533	6.03642	7.21958	6.54425
1427385_s_at	Actn1	actinin, alpha 1	109711	-1.31046	-2.4802	0.000539859	0.00559284	-1	-0.233387	-1.17559	0.465864	0.623181	0	-0.777261	-1.71387	0.0230275	0.0511798	0	9.46093	8.68367	7.37321	8.45028
1417586_at	Timeless	timeless homolog (Drosophila)	21853	-1.01709	-2.02383	0.000539955	0.00559284	-1	-0.760385	-1.69394	0.00573213	0.0261635	0	0.0498568	1.03516	0.839847	0.884049	0	8.94786	8.99772	7.98063	8.23733
1419040_at	Cyp2d22	cytochrome P450, family 2, subfamily d, polypeptide 22	56448	1.49513	2.81889	0.000542128	0.00560408	1	2.4127	5.32471	2.29125e-06	0.000170933	1	-2.26605	-4.81005	5.21114e-06	7.48664e-05	-1	8.68399	6.41794	7.91307	8.83065
1433892_at	Spag5	sperm associated antigen 5	54141	-2.37939	-5.20316	0.000543954	0.00561696	-1	-2.32882	-5.02394	0.000663983	0.00584501	-1	1.31363	2.48567	0.0329196	0.0679602	0	5.4468	6.76043	4.38104	4.43161
1458642_at	Klre1	killer cell lectin-like receptor family E member 1	243655	-1.81029	-3.50713	0.000545606	0.0056269	-1	-1.94769	-3.85757	0.000268415	0.00319644	-1	4.21781	18.6075	1.12456e-08	9.35926e-07	1	4.21231	8.43012	6.61983	6.48243
1437865_at	Spata13	spermatogenesis associated 13	219140	-1.57361	-2.97649	0.000548048	0.00564591	-1	-0.820557	-1.76609	0.0427572	0.11205	0	1.6218	3.07758	0.000411482	0.00208878	1	5.1221	6.7439	5.17029	5.92334
1416235_at	Lrrc59	leucine rich repeat containing 59	98238	-1.40286	-2.64425	0.000548369	0.00564591	-1	-1.54095	-2.90987	0.000218864	0.00281396	-1	1.40226	2.64315	0.000550568	0.00260795	1	8.11494	9.5172	8.11434	7.97624
1421398_at	Trim7	tripartite motif-containing 7	94089	1.42523	2.68558	0.000548637	0.00564591	1	0.889322	1.85231	0.0177271	0.0594615	0	-0.330531	-1.25748	0.345572	0.44346	0	4.00117	3.67064	5.09588	4.55996
1441305_at	Nedd4l	neural precursor cell expressed, developmentally down-regulated gene 4-like	83814	0.914864	1.88539	0.000551726	0.00567301	0	1.02745	2.03842	0.000175395	0.00246546	1	-1.79098	-3.46049	1.57899e-07	5.89237e-06	-1	6.24918	4.4582	5.37307	5.48565
1425930_a_at	Mlx	MAX-like protein X	21428	-0.649551	-1.56868	0.000551942	0.00567335	0	-1.01538	-2.02143	3.57687e-06	0.000232647	-1	0.851518	1.8044	3.1764e-05	0.000293712	0	7.2297	8.08122	7.43166	7.06584
1425335_at	Cd8a	CD8 antigen, alpha chain	12525	-1.91149	-3.76197	0.000553006	0.0056824	-1	-1.72393	-3.30336	0.00138747	0.00974722	-1	4.63221	24.7989	6.22465e-09	6.02235e-07	1	4.4247	9.05691	7.14542	7.33297
1442710_at				1.20003	2.29744	0.000555848	0.00569836	1	0.584192	1.4992	0.0571748	0.137786	0	-0.570528	-1.48507	0.0626662	0.114503	0	7.12648	6.55595	7.75598	7.14015
1457692_at				1.17964	2.26521	0.000557895	0.00571556	1	1.60722	3.04663	2.03853e-05	0.000619969	1	-1.66516	-3.1715	1.32545e-05	0.000150369	-1	8.95094	7.28577	8.46542	8.89299
1457166_at				0.994326	1.99215	0.000559811	0.00572759	0	0.913909	1.88414	0.00119369	0.00881561	0	-1.407	-2.65186	1.29203e-05	0.000147551	-1	9.72589	8.31889	9.31321	9.2328
1425739_at	Pld1	phospholipase D1	18805	-0.740759	-1.67106	0.000561496	0.00573725	0	-0.759462	-1.69286	0.00044355	0.00442835	0	1.01653	2.02305	1.88519e-05	0.000195464	1	5.35027	6.3668	5.62605	5.60734
1444620_at				1.05812	2.08221	0.000561987	0.00573725	1	1.06765	2.09602	0.000516605	0.00490918	1	-1.53238	-2.89263	9.74223e-06	0.000118701	-1	9.28568	7.75329	8.81141	8.82095
1423769_at	Ptcd2	pentatricopeptide repeat domain 2	68927	-0.644131	-1.5628	0.000563271	0.00574727	0	-0.62772	-1.54512	0.000714778	0.00615735	0	1.33907	2.52988	6.72211e-08	3.25182e-06	1	8.94512	10.2842	9.64006	9.65647
1459183_at				-0.82741	-1.7745	0.000563445	0.00574727	0	-0.0675199	-1.04791	0.737952	0.84744	0	-1.09098	-2.13019	3.04559e-05	0.000284163	-1	10.0812	8.99019	8.16278	8.92267
1424263_at	Aif1l	allograft inflammatory factor 1-like	108897	1.69159	3.23012	0.000564618	0.00575138	1	2.23658	4.71279	2.95664e-05	0.000790183	1	-1.32009	-2.49682	0.00438069	0.0134204	-1	10.48	9.15996	10.8515	11.3965
1426171_x_at	Klra7	killer cell lectin-like receptor, subfamily A, member 7	16638	-1.72549	-3.30692	0.000564735	0.00575138	-1	-2.45045	-5.46588	1.25016e-05	0.000466255	-1	6.51115	91.212	4.31694e-12	4.06169e-09	1	2.80587	9.31703	7.59154	6.86657
1423284_at	Mansc1	MANSC domain containing 1	67729	0.785668	1.72389	0.000567375	0.00577257	0	1.11623	2.1678	1.25148e-05	0.000466255	1	-0.945688	-1.92611	8.64179e-05	0.00063016	0	10.7797	9.83398	10.6197	10.9502
1442346_at				1.50036	2.82913	0.00056757	0.00577265	1	1.11851	2.17123	0.00606246	0.0272217	1	-0.222297	-1.16659	0.545292	0.638222	0	5.88747	5.66518	7.16554	6.78369
1419202_at	Cst7	cystatin F (leukocystatin)	13011	-1.97076	-3.91976	0.000570911	0.00579522	-1	-1.82181	-3.53525	0.00115678	0.00862363	-1	4.4636	22.0637	1.87617e-08	1.33368e-06	1	4.24314	8.70674	6.73597	6.88492
1435449_at	Bcl2l11	BCL2-like 11 (apoptosis facilitator)	12125	-0.756576	-1.68948	0.000574934	0.0058246	0	-0.448111	-1.36425	0.0240113	0.0737697	0	1.1991	2.29596	3.16109e-06	5.18366e-05	1	2.506	3.70509	2.94852	3.25698
1455606_at	N4bp1	NEDD4 binding protein 1	80750	-0.782044	-1.71957	0.000578215	0.00585017	0	-0.522311	-1.43625	0.0123975	0.0457493	0	1.73863	3.33717	2.54678e-08	1.63926e-06	1	7.49253	9.23116	8.44911	8.70885
1435054_at	Eme1	essential meiotic endonuclease 1 homolog 1 (S. pombe)	268465	-2.25941	-4.78795	0.000579811	0.00585865	-1	-2.68973	-6.45193	9.99712e-05	0.00169409	-1	1.84023	3.58067	0.00326402	0.0105916	1	4.82409	6.66432	4.40491	3.97459
1456892_at	D030036P13Rik	RIKEN cDNA D030036P13 gene	320105	1.55325	2.93478	0.00058258	0.00587305	1	1.88643	3.69719	8.07987e-05	0.0014688	1	-2.08443	-4.24109	2.58117e-05	0.000249959	-1	7.18555	5.10112	6.65437	6.98755
1444083_at	Ttn	titin	22138	1.14017	2.20407	0.0005831	0.00587305	1	1.7732	3.4181	4.12941e-06	0.000251666	1	-1.62254	-3.07916	1.27162e-05	0.000146082	-1	12.7097	11.0871	12.2273	12.8603
1450875_at	Gpr37	G protein-coupled receptor 37	14763	2.20074	4.59716	0.000584722	0.00588524	1	2.55691	5.88444	0.000131083	0.00203222	1	-1.42146	-2.67856	0.0151767	0.0365261	-1	7.35981	5.93835	8.13909	8.49526
1435282_at	Fam189a2	family with sequence similarity 189, member A2	381217	0.81857	1.76366	0.0005851	0.00588713	0	1.34052	2.53242	2.09927e-06	0.000161675	1	-1.30731	-2.4748	2.92975e-06	4.90828e-05	-1	9.30506	7.99775	8.81632	9.33826
1444387_at	Nmt2	N-myristoyltransferase 2	18108	1.05374	2.0759	0.000586191	0.00589619	1	0.599509	1.5152	0.0296354	0.0860737	0	-1.11918	-2.17223	0.000329278	0.00176192	-1	8.54092	7.42174	8.47548	8.02125
1453495_at	Klk12	kallikrein related-peptidase 12	69511	-2.22779	-4.68416	0.000587809	0.00591005	-1	-1.63171	-3.09879	0.00700554	0.0302456	-1	3.64568	12.5158	2.13369e-06	3.90622e-05	1	5.106	8.75167	6.52388	7.11997
1417946_at	Abhd3	abhydrolase domain containing 3	106861	0.940914	1.91974	0.000592926	0.00594683	0	1.28874	2.44314	2.06948e-05	0.000624474	1	-1.91673	-3.77566	9.86132e-08	4.25218e-06	-1	8.84282	6.9261	7.86701	8.21483
1452598_at	Gins1	GINS complex subunit 1 (Psf1 homolog)	69270	-1.07151	-2.10163	0.000592954	0.00594683	-1	-1.36579	-2.57717	4.80161e-05	0.00105431	-1	1.02193	2.03064	0.000911954	0.00387352	1	9.46079	10.4827	9.41121	9.11694
1452298_a_at	Myo5b	myosin VB	17919	-1.02837	-2.03972	0.000594938	0.00596286	-1	-0.49067	-1.4051	0.0635566	0.148877	0	1.4231	2.68161	1.8363e-05	0.000191807	1	9.43577	10.8589	9.83049	10.3682
1430750_at	Dhfr	dihydrofolate reductase	13361	-1.14045	-2.2045	0.000598298	0.0059893	-1	-1.01085	-2.0151	0.00172066	0.0112373	-1	0.737754	1.66758	0.0152567	0.0366645	0	4.77845	5.51621	4.37576	4.50535
1452421_at	Hoxa3	homeobox A3	15400	0.924639	1.89821	0.000602681	0.00602486	0	1.19679	2.29229	4.10956e-05	0.000969751	1	-1.44011	-2.71342	4.24295e-06	6.44562e-05	-1	8.63297	7.19286	8.1175	8.38964
1416287_at	Rgs4	regulator of G-protein signaling 4	19736	-1.41871	-2.67347	0.000604567	0.00604134	-1	-0.746841	-1.67811	0.0429492	0.112439	0	2.25742	4.78137	3.22186e-06	5.24165e-05	1	3.51631	5.77374	4.35503	5.0269
1439073_at	Zfp160	zinc finger protein 160	224585	2.19646	4.58353	0.00060472	0.00604134	1	2.40902	5.31113	0.000247215	0.0030276	1	-2.78609	-6.89758	5.19872e-05	0.000430009	-1	7.156	4.36991	6.56637	6.77893
1456623_at	Tpm1	tropomyosin 1, alpha	22003	1.3364	2.5252	0.000613713	0.00611055	1	1.58191	2.99366	0.000113549	0.00185611	1	-2.74119	-6.68621	9.40879e-08	4.09699e-06	-1	8.26016	5.51898	6.85537	7.10089
1426214_at	Imp4	IMP4, U3 small nucleolar ribonucleoprotein, homolog (yeast)	27993	-0.989984	-1.98616	0.000613782	0.00611055	0	-0.613601	-1.53007	0.0196325	0.0640961	0	1.2005	2.29819	8.73989e-05	0.000635479	1	6.1038	7.30429	6.31431	6.69069
1440967_at	Gm15708	predicted gene 15708	100504231	1.05477	2.07738	0.000615842	0.00612282	1	1.10351	2.14877	0.000401695	0.00413062	1	-0.0426527	-1.03001	0.869409	0.907608	0	5.77996	5.7373	6.79207	6.84081
1419184_a_at	Fhl2	four and a half LIM domains 2	14200	-2.38032	-5.20654	0.000617047	0.00613086	-1	-2.04337	-4.12206	0.00228928	0.0137265	-1	1.51012	2.84835	0.0173426	0.0406793	1	7.73611	9.24624	6.86591	7.20287
1437256_at	Dcun1d5	DCN1, defective in cullin neddylation 1, domain containing 5 (S. cerevisiae)	76863	0.575717	1.49042	0.00061788	0.00613717	0	0.619629	1.53648	0.000305549	0.00345879	0	-1.82238	-3.53664	9.9398e-11	2.94333e-08	-1	6.30266	4.48029	5.056	5.09991
1426284_at	Krt20	keratin 20	66809	1.3228	2.50151	0.000618923	0.00614468	1	0.183364	1.13553	0.574785	0.720488	0	-0.817384	-1.76221	0.0200534	0.0457384	0	3.4499	2.63251	3.95531	2.81588
1429617_at	Cyld	cylindromatosis (turban tumor syndrome)	74256	-0.725879	-1.65391	0.000619033	0.00614468	0	-0.846534	-1.79818	0.000134437	0.00206297	0	1.30816	2.47626	6.15025e-07	1.57626e-05	1	6.04149	7.34966	6.62378	6.50312
1448759_at	Il2rb	interleukin 2 receptor, beta chain	16185	-1.93434	-3.82204	0.000622015	0.00616046	-1	-1.33611	-2.52469	0.0106048	0.0409076	-1	4.66372	25.3467	8.21812e-09	7.46138e-07	1	5.10129	9.76502	7.83067	8.42891
1421421_at	Angptl1	angiopoietin-like 1	72713	1.56392	2.95657	0.000623201	0.00616825	1	1.3477	2.54506	0.00223953	0.013521	1	-1.93679	-3.82852	7.05695e-05	0.000541604	-1	7.93657	5.99978	7.5637	7.34748
1435397_at	Zbtb44	zinc finger and BTB domain containing 44	235132	0.791828	1.73127	0.000624066	0.00617067	0	0.735424	1.66489	0.00120658	0.00888363	0	-1.06734	-2.09557	2.67373e-05	0.000257077	-1	8.7578	7.69045	8.48228	8.42588
1425151_a_at	Noxo1	NADPH oxidase organizer 1	71893	-1.17995	-2.26569	0.000629335	0.00620244	-1	-0.615524	-1.53211	0.0455008	0.117053	0	1.19318	2.28656	0.000567413	0.0026669	1	4.8629	6.05608	4.87613	5.44055
1435639_at	2610528A11Rik	RIKEN cDNA 2610528A11 gene	70045	-2.31999	-4.99327	0.000633504	0.00623237	-1	-1.53694	-2.90177	0.0137829	0.049509	-1	7.07723	135.039	1.91986e-10	4.68022e-08	1	6.81899	13.8962	11.5762	12.3593
1453053_at	Cenpw	centromere protein W	66311	-1.87636	-3.67147	0.000635033	0.00623948	-1	-2.18448	-4.54562	0.000140972	0.00212121	-1	1.27728	2.42382	0.0117503	0.0296317	1	3.67164	4.94892	3.07256	2.76445
1444521_at	Pigl	phosphatidylinositol glycan anchor biosynthesis, class L	327942	0.57935	1.49418	0.000635958	0.00624461	0	0.877871	1.83766	6.51094e-06	0.000319855	0	-1.24684	-2.37321	4.86659e-08	2.57115e-06	-1	6.14246	4.89562	5.47497	5.77349
1439157_at	Btnl9	butyrophilin-like 9	237754	1.4676	2.76561	0.000640719	0.0062814	1	2.3593	5.13122	3.05736e-06	0.000208035	1	-3.20913	-9.24791	3.87565e-08	2.16509e-06	-1	6.47469	3.26557	4.73317	5.62487
1434357_a_at	Kpnb1	karyopherin (importin) beta 1	16211	-0.988389	-1.98397	0.000641338	0.00628548	0	-1.09219	-2.13198	0.000244393	0.00301618	-1	0.592564	1.50792	0.0239675	0.0528026	0	7.99481	8.58738	7.59899	7.49518
1426821_at	Cog8	component of oligomeric golgi complex 8	97484	-0.983311	-1.977	0.000645292	0.00631278	0	-0.471558	-1.38661	0.0644526	0.150419	0	1.05096	2.0719	0.000342797	0.0018201	1	6.38261	7.43357	6.45026	6.96201
1435497_at	5730590G19Rik	RIKEN cDNA 5730590G19 gene	77011	-2.0237	-4.06626	0.000645713	0.00631287	-1	-2.0014	-4.00387	0.000714755	0.00615735	-1	1.43638	2.70642	0.00917692	0.0243439	1	2.77995	4.21633	2.19263	2.21493
1419255_at	Spnb2	spectrin beta 2	20742	0.742901	1.67354	0.000645968	0.00631287	0	1.04382	2.06167	1.70097e-05	0.000559503	1	-1.27906	-2.42681	1.2327e-06	2.59641e-05	-1	10.7156	9.43657	10.1795	10.4804
1430362_at	5730409N24Rik	RIKEN cDNA 5730409N24 gene	70485	1.09516	2.13637	0.000649329	0.00633824	1	2.02809	4.07865	4.51199e-07	6.81421e-05	1	-2.58113	-5.98406	1.25812e-08	1.015e-06	-1	7.21502	4.6339	5.72906	6.66199
1450855_at	Arvcf	armadillo repeat gene deleted in velo-cardio-facial syndrome	11877	0.842773	1.79349	0.000649383	0.00633824	0	1.36833	2.58172	2.73443e-06	0.000193283	1	-1.47123	-2.77259	1.02782e-06	2.30423e-05	-1	8.62403	7.15279	7.99556	8.52112
1417645_at	Sspn	sarcospan	16651	1.13695	2.19916	0.00065024	0.00634461	1	1.27682	2.42305	0.000210562	0.002746	1	-1.93221	-3.81638	1.48586e-06	2.98329e-05	-1	9.15967	7.22746	8.36442	8.50429
1421957_a_at	Pcyt1a	phosphate cytidylyltransferase 1, choline, alpha isoform	13026	1.10445	2.15016	0.000654495	0.00638171	1	0.865606	1.82211	0.00476118	0.0229963	0	-0.680855	-1.60309	0.0209711	0.0474575	0	8.85749	8.17663	9.28108	9.04224
1450956_at	Scd3	stearoyl-coenzyme A desaturase 3	30049	1.52568	2.87923	0.000655683	0.00638966	1	2.01248	4.03476	3.66894e-05	0.000903662	1	-3.2174	-9.30111	6.93399e-08	3.32316e-06	-1	11.3271	8.10972	9.6354	10.1222
1425711_a_at	Akt1	thymoma viral proto-oncogene 1	11651	-0.879683	-1.83997	0.000657741	0.00640769	0	-0.653782	-1.57329	0.00689231	0.0299195	0	1.01065	2.01481	0.000168624	0.00104349	1	7.34979	8.36044	7.48075	7.70666
1418133_at	Bcl3	B cell leukemia/lymphoma 3	12051	-1.14926	-2.218	0.000662706	0.00644188	-1	-1.3496	-2.54841	0.000135111	0.00206672	-1	2.43282	5.3995	6.66597e-08	3.22971e-06	1	7.94567	10.3785	9.22924	9.0289
1430584_s_at	Car3	carbonic anhydrase 3	12350	1.22899	2.34403	0.000663439	0.00644698	1	1.12739	2.18463	0.00141881	0.00991339	1	-1.25487	-2.38645	0.000546801	0.00259647	-1	10.928	9.67309	10.9021	10.8005
1460598_at	Il28ra	interleukin 28 receptor alpha	242700	0.717269	1.64407	0.000668816	0.00648295	0	1.1722	2.25355	2.61646e-06	0.00018622	1	-1.05993	-2.08483	9.57513e-06	0.00011708	-1	7.82722	6.7673	7.48457	7.93949
1452226_at	Rcc2	regulator of chromosome condensation 2	108911	-1.25435	-2.38559	0.000672518	0.00650458	-1	-0.7942	-1.73412	0.0184571	0.0612402	0	0.910929	1.88026	0.00815288	0.0221027	0	8.97621	9.88714	8.6328	9.09294
1442615_at				1.21348	2.31897	0.000676067	0.00652667	1	0.714817	1.64128	0.0269592	0.0803664	0	-0.754317	-1.68683	0.0204456	0.0464749	0	4.13064	3.37632	4.5898	4.09114
1458459_a_at	E230029C05Rik	RIKEN cDNA E230029C05 gene	319711	-1.94682	-3.85523	0.000676489	0.00652871	-1	-1.79236	-3.4638	0.00140095	0.00982635	-1	2.67	6.36431	2.4161e-05	0.000237242	1	3.31354	5.98354	4.03673	4.19119
1448256_at	Gosr1	golgi SNAP receptor complex member 1	53334	-0.940965	-1.91981	0.000677685	0.00653618	0	-1.24009	-2.36213	3.86477e-05	0.00093111	-1	2.94634	7.70793	1.40695e-10	3.7551e-08	1	4.59375	7.54009	6.59913	6.30001
1417587_at	Timeless	timeless homolog (Drosophila)	21853	-1.86763	-3.64933	0.000679433	0.006551	-1	-1.38106	-2.6046	0.00729602	0.0312125	-1	0.723576	1.65127	0.131088	0.206412	0	4.59354	5.31711	3.44948	3.93605
1438667_at	Sybu	syntabulin (syntaxin-interacting)	319613	1.47558	2.78096	0.000680721	0.00655525	1	1.69478	3.23728	0.000175831	0.0024688	1	-1.74516	-3.35233	0.000129239	0.000858821	-1	5.76924	4.02407	5.49966	5.71886
1455730_at	Dlgap5	discs, large (Drosophila) homolog-associated protein 5	218977	-1.19591	-2.29089	0.000681642	0.00656003	-1	-1.05878	-2.08317	0.00194962	0.0122584	-1	1.52783	2.88352	5.554e-05	0.000450962	1	7.15511	8.68294	7.48703	7.62416
1418855_at	Lce1l	late cornified envelope 1L	73730	1.53904	2.90601	0.000682946	0.0065661	1	1.74281	3.34686	0.000204245	0.0027047	1	-1.1558	-2.22807	0.00660627	0.0186547	-1	12.3254	11.1696	12.7086	12.9124
1456280_at	Clspn	claspin homolog (Xenopus laevis)	269582	-1.45647	-2.74437	0.000684655	0.0065708	-1	-1.50142	-2.83121	0.000516212	0.00490845	-1	1.01884	2.02628	0.0104604	0.026981	1	7.96521	8.98404	7.52757	7.48262
1434909_at	Rragd	Ras-related GTP binding D	52187	0.982434	1.9758	0.00068467	0.0065708	0	1.04493	2.06327	0.000382747	0.00400332	1	-1.22044	-2.33018	7.63656e-05	0.000573994	-1	12.0337	10.8133	11.7957	11.8582
1416552_at	Dppa5a	developmental pluripotency associated 5A	434423	-1.78356	-3.44276	0.000685435	0.00657609	-1	-1.88207	-3.68603	0.000413673	0.00421706	-1	4.839	28.621	1.49474e-09	2.18289e-07	1	4.57413	9.41313	7.62957	7.53107
1451544_at	Tapbpl	TAP binding protein-like	213233	-0.790925	-1.73018	0.000686052	0.00657794	0	-0.819525	-1.76483	0.000492824	0.00475767	0	1.059	2.08349	3.26504e-05	0.000299425	1	9.95401	11.013	10.2221	10.1935
1437927_at	Dlg2	discs, large homolog 2 (Drosophila)	23859	1.28037	2.42902	0.000689002	0.00659601	1	1.15423	2.22565	0.0016982	0.0111438	1	-0.601978	-1.5178	0.0712108	0.126852	0	9.54901	8.94703	10.2274	10.1013
1427141_at	2700099C18Rik	NDC80 homolog, kinetochore complex component pseudogene	77022	-0.829638	-1.77724	0.000689622	0.00659702	0	-1.17997	-2.26573	1.59952e-05	0.000539889	-1	0.574213	1.48886	0.011219	0.0285406	0	8.74032	9.31454	8.4849	8.13456
1437117_at	Acap1	ArfGAP with coiled-coil, ankyrin repeat and PH domains 1	216859	-1.28547	-2.43761	0.000690471	0.00659702	-1	-0.560001	-1.47427	0.0926579	0.195401	0	2.30302	4.93491	7.87758e-07	1.90987e-05	1	4.74227	7.04529	5.75982	6.48529
1438833_at	Casc5	cancer susceptibility candidate 5	76464	-1.15114	-2.22089	0.000690599	0.00659702	-1	-1.52816	-2.88418	3.63793e-05	0.000899604	-1	0.5445	1.45851	0.0697221	0.124746	0	8.15894	8.70344	7.5523	7.17528
1444764_at				0.770701	1.7061	0.000692381	0.00660997	0	1.50289	2.8341	2.38475e-07	4.85735e-05	1	-1.91029	-3.75885	6.39591e-09	6.16876e-07	-1	6.75685	4.84656	5.61726	6.34945
1417633_at	Sod3	superoxide dismutase 3, extracellular	20657	-1.37134	-2.5871	0.000697593	0.0066366	-1	-0.966101	-1.95355	0.010139	0.0395621	0	1.20012	2.29759	0.00218368	0.00772474	1	9.2139	10.414	9.04268	9.44792
1419100_at	Serpina3n	serine (or cysteine) peptidase inhibitor, clade A, member 3N	20716	-0.868416	-1.82566	0.000697743	0.0066366	0	-0.641494	-1.55994	0.00748888	0.0318527	0	2.33094	5.03133	1.83234e-09	2.55537e-07	1	10.2077	12.5386	11.6702	11.8971
1458647_at	6430553K19Rik	RIKEN cDNA 6430553K19 gene	619300	-1.20226	-2.301	0.000698831	0.00663869	-1	-1.31821	-2.49357	0.000290235	0.00334184	-1	1.22343	2.33501	0.000595004	0.00276223	1	2.50248	3.72592	2.52365	2.4077
1424144_at	Cdt1	chromatin licensing and DNA replication factor 1	67177	-1.2264	-2.33983	0.000699188	0.00663869	-1	-1.27604	-2.42173	0.000483199	0.00468831	-1	1.04523	2.0637	0.00269458	0.00911542	1	7.92741	8.97265	7.74625	7.69661
1434850_at	Iqgap3	IQ motif containing GTPase activating protein 3	404710	-1.30509	-2.47099	0.000700557	0.00664499	-1	-1.19569	-2.29055	0.00150726	0.0103195	-1	0.97852	1.97044	0.00680423	0.0190866	0	4.89232	5.87084	4.56575	4.67515
1453421_at	Srr	serine racemase	27364	1.45037	2.73278	0.000706333	0.00668338	1	1.47966	2.78883	0.000587471	0.00536048	1	-3.1012	-8.58134	6.36661e-08	3.11564e-06	-1	5.72082	2.61962	4.06999	4.09928
1435649_at	Nexn	nexilin	68810	0.83876	1.78851	0.000707395	0.00668845	0	1.10455	2.15033	4.11554e-05	0.000969751	1	-0.924335	-1.89781	0.000279601	0.00154745	0	9.87205	8.94772	9.78648	10.0523
1458934_at	D5Ertd505e	DNA segment, Chr 5, ERATO Doi 505, expressed	52485	1.42946	2.69345	0.000707732	0.00668845	1	1.68901	3.22435	0.000136577	0.00208091	1	-0.47185	-1.38689	0.196431	0.283599	0	5.18425	4.7124	6.14186	6.40141
1424268_at	Smox	spermine oxidase	228608	-1.01647	-2.02297	0.000708401	0.00669101	-1	-0.714129	-1.64049	0.0104218	0.0403878	0	1.86007	3.63026	6.09814e-07	1.56809e-05	1	8.4322	10.2923	9.27581	9.57815
1443603_at				1.04053	2.05698	0.000708867	0.00669101	1	1.05248	2.07409	0.000638355	0.00569032	1	-0.978013	-1.96975	0.00122679	0.00491416	0	8.64096	7.66294	8.70347	8.71542
1439689_at	9030224M15Rik	RIKEN cDNA 9030224M15 gene	327747	1.68695	3.21975	0.000710128	0.00669883	1	1.53058	2.88901	0.00165473	0.0109599	1	-1.47187	-2.77381	0.00227188	0.00797024	-1	6.62397	5.1521	6.83905	6.68268
1432600_at	2310061A09Rik	RIKEN cDNA 2310061A09 gene	70403	1.18299	2.27046	0.000710417	0.00669952	1	0.309232	1.23905	0.302397	0.459337	0	-1.14627	-2.21341	0.00094304	0.00397516	-1	3.31344	2.16717	3.35015	2.4764
1460674_at	Paqr7	progestin and adipoQ receptor family member VII	71904	1.4078	2.65332	0.00071126	0.00670542	1	2.13028	4.37801	7.73347e-06	0.000347143	1	-1.76685	-3.40309	7.14011e-05	0.00054711	-1	11.3903	9.62348	11.0313	11.7538
1429273_at	Bmper	BMP-binding endothelial regulator	73230	-1.14579	-2.21267	0.000713422	0.00671354	-1	-1.43888	-2.7111	7.11902e-05	0.00135968	-1	-0.173074	-1.12746	0.547466	0.640316	0	8.68726	8.51419	7.3684	7.07531
1418419_at	Fbxl20	F-box and leucine-rich repeat protein 20	72194	0.682807	1.60526	0.00071543	0.00672508	0	1.17371	2.25591	1.46639e-06	0.000130459	1	-0.697634	-1.62184	0.000587004	0.00273576	0	8.94582	8.24819	8.931	9.4219
1425921_a_at	1810055G02Rik	RIKEN cDNA 1810055G02 gene	72056	-0.975299	-1.96605	0.000715517	0.00672508	0	-1.04424	-2.06228	0.000376114	0.00395667	-1	0.0139827	1.00974	0.954255	0.970823	0	9.73175	9.74574	8.77044	8.7015
1442139_at				0.918432	1.89006	0.000716446	0.00672768	0	0.465402	1.3807	0.0543775	0.133211	0	-1.11721	-2.16927	0.000101473	0.000712708	-1	5.8261	4.70889	5.62732	5.17429
1421825_at	Bace1	beta-site APP cleaving enzyme 1	23821	0.480985	1.3957	0.0007191	0.00674442	0	0.705939	1.63121	1.15027e-05	0.000441839	0	-1.13988	-2.20363	1.37244e-08	1.08119e-06	-1	7.16776	6.02788	6.50886	6.73382
1453395_at	5330403D14Rik	RIKEN cDNA 5330403D14 gene	76675	1.09643	2.13825	0.000721234	0.00675811	1	1.36412	2.5742	7.99683e-05	0.00145722	1	-2.18279	-4.54031	1.88577e-07	6.66479e-06	-1	10.4718	8.28902	9.38545	9.65314
1426737_at	Gspt1	G1 to S phase transition 1	14852	-0.91122	-1.88064	0.000721551	0.00675811	0	-1.01923	-2.02683	0.000246157	0.00302181	-1	0.609973	1.52623	0.0140901	0.0343515	0	7.09835	7.70833	6.79711	6.6891
1428771_at	Klhdc10	kelch domain containing 10	76788	-1.3476	-2.54488	0.000721869	0.00675811	-1	-1.29453	-2.45297	0.0010334	0.00795692	-1	1.13216	2.19187	0.00309015	0.0101486	1	6.52912	7.66128	6.31368	6.36675
1441991_at	Prss53	protease, serine, 53	330657	-3.58717	-12.0184	0.000723789	0.00677403	-1	-2.94104	-7.67964	0.00371878	0.0192595	-1	2.02067	4.05771	0.0346194	0.070747	0	7.61815	9.63881	6.05164	6.69777
1422562_at	Rrad	Ras-related associated with diabetes	56437	-1.38295	-2.608	0.000727444	0.00679592	-1	-0.608585	-1.52476	0.0913391	0.19345	0	1.44467	2.722	0.000484844	0.00236615	1	5.84128	7.28595	5.90301	6.67737
1426772_x_at				-0.985374	-1.97983	0.00072947	0.00680275	0	-0.878508	-1.83847	0.00195654	0.0122844	0	1.99029	3.97316	1.55576e-07	5.82051e-06	1	10.2562	12.2464	11.2611	11.3679
1457429_s_at	Gm106	predicted gene 106	226866	0.887205	1.84959	0.000730248	0.00680773	0	1.00409	2.00567	0.000221462	0.00283091	1	-1.72072	-3.29601	2.80407e-07	8.8854e-06	-1	6.73494	5.01422	5.90143	6.01831
1429385_at	Dcaf7	DDB1 and CUL4 associated factor 7	71833	-1.73448	-3.32761	0.000730896	0.00681172	-1	-0.939756	-1.9182	0.0414506	0.109579	0	1.68427	3.21378	0.00095115	0.00400209	1	5.07777	6.76204	5.02756	5.82228
1423466_at	Ccr7	chemokine (C-C motif) receptor 7	12775	-2.05752	-4.16272	0.000731301	0.00681205	-1	-2.51277	-5.70715	9.96166e-05	0.00168901	-1	4.00509	16.0565	2.66738e-07	8.54004e-06	1	4.01899	8.02408	5.96656	5.51131
1440303_at	Slc7a6os	solute carrier family 7, member 6 opposite strand	66432	1.20584	2.30671	0.000733338	0.00682626	1	1.22006	2.32957	0.000658787	0.00581415	1	-1.58413	-2.99826	4.42813e-05	0.000379331	-1	7.36794	5.78382	6.98965	7.00388
1448355_at	Prss16	protease, serine, 16 (thymus)	54373	-1.32032	-2.49721	0.000735811	0.006839	-1	-1.42731	-2.68945	0.000352856	0.00379057	-1	1.19381	2.28756	0.00175806	0.00652561	1	2.70138	3.89519	2.57487	2.46788
1439669_at	6430571L13Rik	RIKEN cDNA 6430571L13 gene	235599	1.68009	3.20449	0.000737316	0.00685093	1	1.30465	2.47023	0.00556726	0.0256225	1	-2.54394	-5.83181	8.06358e-06	0.000104107	-1	8.54914	6.0052	7.68529	7.30985
1427790_at	Adam1a	a disintegrin and metallopeptidase domain 1a	280668	1.14364	2.20938	0.000739536	0.00686538	1	1.40758	2.65292	9.27792e-05	0.00160741	1	-1.22146	-2.33182	0.000399024	0.00204227	-1	6.8156	5.59414	6.73779	7.00172
1427094_at	Pole2	polymerase (DNA directed), epsilon 2 (p59 subunit)	18974	-0.913064	-1.88304	0.000741193	0.00687458	0	-1.02631	-2.0368	0.000241363	0.00299497	-1	0.246103	1.186	0.290219	0.385415	0	8.55717	8.80327	7.8902	7.77696
1418259_a_at	Entpd2	ectonucleoside triphosphate diphosphohydrolase 2	12496	1.38571	2.613	0.000743719	0.00689141	1	1.46054	2.75211	0.00045579	0.0045156	1	-1.63293	-3.10142	0.00014882	0.000949797	-1	10.75	9.1171	10.5028	10.5776
1449203_at	Slco1a5	solute carrier organic anion transporter family, member 1a5	108096	-2.99328	-7.96283	0.000746412	0.00691056	-1	-2.74644	-6.7106	0.00157784	0.0106357	-1	3.79367	13.8678	6.79204e-05	0.000525967	1	3.45095	7.24462	4.25134	4.49818
1450718_at	Sh2b2	SH2B adaptor protein 2	23921	-1.24302	-2.36693	0.000746868	0.00691272	-1	-1.13336	-2.19369	0.00166325	0.0109843	-1	2.2087	4.62257	9.94424e-07	2.24889e-05	1	6.3949	8.60359	7.36058	7.47023
1460191_at	Ykt6	YKT6 homolog (S. Cerevisiae)	56418	-0.902016	-1.86868	0.000747561	0.00691438	0	-0.984021	-1.97797	0.000328314	0.00360575	0	1.00384	2.00533	0.000269356	0.00150014	1	8.11887	9.12271	8.2207	8.13869
1455298_at				1.57611	2.98165	0.000749467	0.00692849	1	1.7022	3.25398	0.000363274	0.00385831	1	-2.74644	-6.71061	1.3059e-06	2.70107e-05	-1	9.97882	7.23237	8.80848	8.93458
1449824_at	Prg4	proteoglycan 4 (megakaryocyte stimulating factor, articular superficial zone protein)	96875	-2.36982	-5.16877	0.000749695	0.00692852	-1	-1.93437	-3.82211	0.00395306	0.0201526	-1	5.10028	34.3034	6.3703e-08	3.11564e-06	1	5.69408	10.7944	8.42454	8.85999
1445548_at				0.731189	1.66001	0.000750425	0.00693114	0	0.971454	1.96082	4.00524e-05	0.000953863	0	-1.8256	-3.54456	6.5539e-09	6.2269e-07	-1	6.45415	4.62855	5.35973	5.6
1438034_at	Fam82b	family with sequence similarity 82, member B	66302	0.736513	1.66614	0.000751211	0.00693633	0	0.485366	1.39994	0.0158086	0.0546975	0	-1.12485	-2.18079	7.42254e-06	9.78429e-05	-1	8.46422	7.33937	8.07588	7.82474
1453131_at	Cd300lg	CD300 antigen like family member G	52685	1.55987	2.94827	0.000754112	0.0069486	1	1.65318	3.14526	0.000438803	0.00439087	1	-1.49758	-2.82369	0.00108315	0.00443871	-1	7.76364	6.26605	7.82593	7.91923
1429154_at	Slc35f2	solute carrier family 35, member F2	72022	-1.14647	-2.21371	0.000754373	0.00694894	-1	-0.909405	-1.87827	0.00488198	0.023343	0	1.88616	3.6965	2.85233e-06	4.81505e-05	1	6.84445	8.73061	7.58415	7.82121
1427656_at	Tcrb-J	T cell receptor beta, joining region	21580	-1.31992	-2.49652	0.000761487	0.00700405	-1	-1.18257	-2.26981	0.00195357	0.0122735	-1	2.17743	4.52348	2.78961e-06	4.735e-05	1	6.41083	8.58826	7.26834	7.40569
1417483_at	Nfkbiz	nuclear factor of kappa light polypeptide gene enhancer in B cells inhibitor, zeta	80859	0.464373	1.37972	0.000762466	0.00700984	0	-0.0382899	-1.0269	0.743559	0.851637	0	1.0784	2.11169	2.07188e-08	1.41682e-06	1	11.4436	12.522	12.9864	12.4837
1420699_at	Clec7a	C-type lectin domain family 7, member a	56644	-2.32083	-4.9962	0.000763386	0.00700984	-1	-1.94811	-3.85868	0.00325918	0.0175883	-1	2.87428	7.33238	9.00612e-05	0.000649952	1	8.86517	11.7395	9.41862	9.79135
1429270_a_at	Syce2	synaptonemal complex central element protein 2	71846	-0.985713	-1.98029	0.000763423	0.00700984	0	-1.11671	-2.16852	0.000230367	0.0029028	-1	0.83644	1.78564	0.00300162	0.00992339	0	9.09946	9.9359	8.95019	8.8192
1421748_a_at	Tubd1	tubulin, delta 1	56427	-0.561865	-1.47618	0.000763475	0.00700984	0	-1.05364	-2.07577	4.85452e-07	6.99051e-05	-1	0.713447	1.63972	6.83855e-05	0.000528643	0	8.45779	9.17124	8.60937	8.11759
1440339_at	Enpp1	ectonucleotide pyrophosphatase/phosphodiesterase 1	18605	1.53158	2.89103	0.000764472	0.00701691	1	1.61878	3.07115	0.000456916	0.00452242	1	-2.45453	-5.48135	4.10101e-06	6.28551e-05	-1	7.84918	5.39465	6.92623	7.01343
1457324_at				0.863494	1.81944	0.000766503	0.00702307	0	1.83081	3.55737	8.25464e-08	2.4812e-05	1	-1.56682	-2.96251	7.74388e-07	1.88483e-05	-1	10.2014	8.63454	9.49803	10.4653
1439806_at	Pogk	pogo transposable element with KRAB domain	71592	0.675738	1.59741	0.000769422	0.00704356	0	1.30976	2.47901	3.07275e-07	5.35621e-05	1	-0.633409	-1.55123	0.00135614	0.005312	0	6.46575	5.83234	6.50807	7.1421
1427485_at	Lmod1	leiomodin 1 (smooth muscle)	93689	1.57709	2.98367	0.000769723	0.00704423	1	1.94479	3.84982	9.53329e-05	0.00163882	1	-2.05154	-4.14549	5.26519e-05	0.000433423	-1	8.24308	6.19154	7.76863	8.13633
1447624_s_at	Stox2	storkhead box 2	71069	0.73892	1.66893	0.000770835	0.00704768	0	0.69844	1.62275	0.00126529	0.00916118	0	-1.40594	-2.64991	4.01251e-07	1.15453e-05	-1	10.6735	9.2676	10.0065	9.96604
1452205_x_at				-0.86417	-1.82029	0.000771011	0.00704768	0	-0.793346	-1.73309	0.00161801	0.0108217	0	1.73182	3.32148	1.90616e-07	6.70998e-06	1	10.6235	12.3554	11.4912	11.562
1452803_at	Glipr2	GLI pathogenesis-related 2	384009	-1.39893	-2.63705	0.000774026	0.0070715	-1	-1.6995	-3.24788	0.000112808	0.00184692	-1	1.5742	2.97771	0.000250438	0.00142163	1	8.81221	10.3864	8.98749	8.68692
1424886_at	Ptprd	protein tyrosine phosphatase, receptor type, D	19266	1.23766	2.35816	0.000774073	0.0070715	1	1.40636	2.65067	0.000226952	0.00287379	1	-1.81537	-3.51949	1.28151e-05	0.000146641	-1	5.91093	4.09556	5.33323	5.50192
1436853_a_at	Snca	synuclein, alpha	20617	0.779683	1.71675	0.000775287	0.0070805	0	0.705605	1.63083	0.00182965	0.0116989	0	-1.07881	-2.11229	2.59851e-05	0.000251208	-1	6.56072	5.48191	6.26159	6.18751
1434253_s_at	Tmcc3	transmembrane and coiled coil domains 3	319880	0.625906	1.54318	0.000779009	0.00710192	0	1.05179	2.0731	2.25689e-06	0.000169755	1	-0.862719	-1.81846	2.73631e-05	0.000261963	0	9.57723	8.71451	9.34041	9.7663
1421916_at	Pdgfra	platelet derived growth factor receptor, alpha polypeptide	18595	-1.77389	-3.41976	0.000780256	0.0071091	-1	-1.18125	-2.26773	0.0152593	0.0532492	0	0.575111	1.48979	0.20883	0.297833	0	6.9744	7.54951	5.77562	6.36826
1422992_s_at	Pik3cd	phosphatidylinositol 3-kinase catalytic delta polypeptide	18707	-0.902614	-1.86945	0.000781398	0.00711096	0	-1.13497	-2.19615	7.84127e-05	0.00144371	-1	1.38246	2.60713	7.56543e-06	9.92482e-05	1	2.85089	4.23335	3.33074	3.09838
1455978_a_at	Matn2	matrilin 2	17181	0.951332	1.93366	0.000781524	0.00711096	0	0.534185	1.44812	0.0365214	0.0999914	0	-1.29228	-2.44915	3.2614e-05	0.000299268	-1	10.5838	9.29152	10.2429	9.8257
1457815_at				0.84113	1.79145	0.000783327	0.00712315	0	1.07748	2.11035	6.39878e-05	0.00126666	1	0.00529761	1.00368	0.980094	0.988315	0	7.86125	7.86655	8.70768	8.94403
1452834_at	Prr5l	proline rich 5 like	72446	-1.5019	-2.83215	0.000783409	0.00712315	-1	-1.4781	-2.78582	0.00090388	0.00722731	-1	-0.0475946	-1.03354	0.900117	0.931211	0	8.75919	8.71159	7.2097	7.23349
1434083_a_at	Elmod1	ELMO domain containing 1	270162	0.826445	1.77331	0.000784462	0.0071289	0	0.632925	1.55071	0.00641535	0.0283661	0	-1.16461	-2.24173	2.12256e-05	0.000214473	-1	11.2394	10.0747	10.9012	10.7077
1426230_at	Sphk2	sphingosine kinase 2	56632	1.21521	2.32174	0.00078786	0.00715732	1	1.10414	2.14971	0.00179694	0.0115518	1	0.977147	1.96857	0.00458506	0.0139088	0	8.00088	8.97802	10.1932	10.0822
1425962_at	Klrb1f	killer cell lectin-like receptor subfamily B member 1F	232408	-1.43347	-2.70096	0.000791601	0.00718215	-1	-1.11846	-2.17115	0.00568721	0.0260083	-1	2.30833	4.95311	4.05165e-06	6.22218e-05	1	2.8719	5.18023	3.74676	4.06177
1445558_at	5930430L01Rik	RIKEN cDNA 5930430L01 gene	319982	0.787139	1.72565	0.000791971	0.00718215	0	1.19736	2.2932	8.40514e-06	0.000364412	1	-0.759945	-1.69343	0.00108152	0.00443317	0	11.6786	10.9187	11.7058	12.116
1428992_at	Unc13d	unc-13 homolog D (C. elegans)	70450	-1.16523	-2.24269	0.000793349	0.0071861	-1	-0.993381	-1.99084	0.00299265	0.0165776	0	1.59463	3.02017	3.04883e-05	0.000284313	1	5.44582	7.04046	5.87522	6.04707
1422639_at	Calcb	calcitonin-related polypeptide, beta	116903	1.2245	2.33675	0.000793608	0.00718634	1	1.24146	2.36438	0.000700464	0.00606782	1	-0.521129	-1.43508	0.104747	0.172701	0	11.395	10.8739	12.0984	12.1154
1427147_at	Mms22l	MMS22-like, DNA repair protein	212377	-1.35169	-2.55211	0.0007942	0.0071875	-1	-1.40748	-2.65274	0.00054761	0.00510516	-1	1.94125	3.84038	1.71691e-05	0.000182289	1	5.26374	7.20499	5.8533	5.79751
1424155_at	Fabp4	fatty acid binding protein 4, adipocyte	11770	1.25247	2.3825	0.000796139	0.00719453	1	2.95575	7.75833	1.74167e-08	8.69709e-06	1	-3.20019	-9.19077	5.05212e-09	5.23123e-07	-1	9.15783	5.95764	7.21011	8.91339
1440589_at				-1.09294	-2.13308	0.000797469	0.00720445	-1	-0.691874	-1.61538	0.0204404	0.0659891	0	0.680432	1.60262	0.0223172	0.0498657	0	8.65737	9.3378	8.24486	8.64593
1439764_s_at	Igf2bp2	insulin-like growth factor 2 mRNA binding protein 2	319765	-0.943175	-1.92275	0.000798078	0.0072072	0	-0.618002	-1.53475	0.0169506	0.0575744	0	2.22651	4.68	1.74066e-08	1.26802e-06	1	9.28886	11.5154	10.5722	10.8974
1425728_at	Gm12185	predicted gene 12185	620913	-1.31689	-2.49129	0.000799236	0.00720779	-1	-1.73444	-3.32751	4.7948e-05	0.00105421	-1	2.00113	4.00313	8.62459e-06	0.000108853	1	3.6044	5.60553	4.28863	3.87109
1459557_at				2.19728	4.58615	0.000802853	0.00723409	1	3.00029	8.00163	3.17852e-05	0.000825563	1	-2.27831	-4.8511	0.000576145	0.00269815	-1	6.78962	4.5113	6.70859	7.5116
1453139_at	Nudt12	nudix (nucleoside diphosphate linked moiety X)-type motif 12	67993	0.653028	1.57247	0.00080506	0.00724764	0	0.864666	1.82092	4.55406e-05	0.00102572	0	-1.16024	-2.23494	1.11608e-06	2.43852e-05	-1	8.94366	7.78342	8.43645	8.64808
1438869_at	4930515G01Rik	RIKEN cDNA 4930515G01 gene	67642	-1.10611	-2.15264	0.000805896	0.00724885	-1	-0.409901	-1.32859	0.154899	0.284407	0	1.60587	3.04379	1.53479e-05	0.000167668	1	3.27047	4.87634	3.77023	4.46644
1427312_at	Cmya5	cardiomyopathy associated 5	76469	1.06096	2.08632	0.000806716	0.00725412	1	1.5109	2.84989	1.94152e-05	0.000599893	1	-1.309	-2.4777	0.000100306	0.000707386	-1	10.9585	9.6495	10.7105	11.1604
1436566_at	Rab40b	Rab40b, member RAS oncogene family	217371	0.514492	1.42849	0.000814788	0.00730548	0	0.457227	1.3729	0.00221471	0.0134262	0	-1.07197	-2.1023	1.18071e-07	4.87163e-06	-1	9.04577	7.9738	8.48829	8.43102
1426285_at	Lama2	laminin, alpha 2	16773	0.944991	1.92518	0.000816206	0.00731396	0	1.20715	2.30882	6.94628e-05	0.00133812	1	-1.44458	-2.72183	8.23984e-06	0.000105677	-1	11.36	9.9154	10.8604	11.1226
1432843_at	5730405O12Rik	RIKEN cDNA 5730405O12 gene	70488	0.8524	1.8055	0.000820938	0.00733726	0	1.38621	2.61392	3.75626e-06	0.000237847	1	-2.23035	-4.69249	3.66209e-09	4.22789e-07	-1	8.37367	6.14332	6.99572	7.52953
1439957_at	Gnal	guanine nucleotide binding protein, alpha stimulating, olfactory type	14680	-0.922022	-1.89477	0.000821505	0.00733969	0	-0.95192	-1.93445	0.000614035	0.00554243	0	1.47639	2.78251	4.59883e-06	6.83991e-05	1	3.22473	4.70112	3.7791	3.7492
1455100_at	Akr1d1	aldo-keto reductase family 1, member D1	208665	2.66684	6.35037	0.000822302	0.00734308	1	2.10688	4.3076	0.00537129	0.024973	1	0.941486	1.92051	0.175219	0.259088	0	2.02016	2.96165	5.62849	5.06854
1432464_a_at	Camsap3	calmodulin regulated spectrin-associated protein family, member 3	69697	0.847933	1.79992	0.000822751	0.00734345	0	1.22398	2.33591	1.69282e-05	0.000559104	1	-1.41295	-2.66281	2.73575e-06	4.66403e-05	-1	11.1493	9.73639	10.5843	10.9604
1424841_s_at	Rbks	ribokinase	71336	-0.492861	-1.40723	0.000823753	0.00734757	0	-0.617844	-1.53458	8.64972e-05	0.00153877	0	1.27634	2.42225	4.33851e-09	4.76913e-07	1	7.95112	9.22746	8.7346	8.60962
1447426_at				1.32435	2.5042	0.000824958	0.00735619	1	1.76166	3.39089	4.45613e-05	0.00101219	1	-1.44059	-2.71431	0.000375752	0.0019483	-1	7.8982	6.45761	7.78196	8.21927
1441218_at	Ttc21a	tetratricopeptide repeat domain 21A	74052	1.65745	3.15457	0.000828953	0.0073825	1	0.0248841	1.0174	0.952871	0.990455	0	0.163891	1.1203	0.697678	0.770837	0	2.02729	2.19118	3.84862	2.21606
1446096_at	2310001H17Rik	RIKEN cDNA 2310001H17 gene	76432	1.95678	3.88195	0.000832071	0.00740469	1	0.789674	1.72868	0.124498	0.242645	0	0.549387	1.46346	0.277165	0.371569	0	4.65612	5.20551	7.16229	5.99518
1424067_at	Icam1	intercellular adhesion molecule 1	15894	-0.74012	-1.67031	0.00084345	0.00748873	0	-0.637584	-1.55572	0.0029109	0.0162821	0	1.13078	2.18977	8.688e-06	0.000109342	1	11.2328	12.3636	11.6234	11.726
1421034_a_at	Il4ra	interleukin 4 receptor, alpha	16190	-1.36712	-2.57955	0.000845282	0.00749854	-1	-1.47288	-2.77575	0.000423314	0.00428434	-1	1.7411	3.34289	7.50242e-05	0.00056711	1	10.2067	11.9478	10.5806	10.4749
1455933_at				0.749733	1.68148	0.000847295	0.00750995	0	0.435465	1.35235	0.0325533	0.0920999	0	-1.05738	-2.08115	2.32851e-05	0.000231366	-1	4.00321	2.94583	3.69556	3.38129
1418346_at	Insl6	insulin-like 6	27356	-1.44411	-2.72094	0.000852342	0.00755036	-1	-1.55777	-2.94398	0.000422003	0.00427387	-1	2.82507	7.08649	3.16795e-07	9.69168e-06	1	5.2076	8.03267	6.58856	6.4749
1425315_at	Dock7	dedicator of cytokinesis 7	67299	1.08533	2.12187	0.000852807	0.00755232	1	0.760975	1.69464	0.0119565	0.0445935	0	-0.942629	-1.92203	0.00275987	0.00928454	0	5.88699	4.94436	6.02969	5.70534
1427931_s_at	Pdxk	pyridoxal (pyridoxine, vitamin B6) kinase	216134	-0.984607	-1.97877	0.000854019	0.00755704	0	-1.32356	-2.50283	4.12901e-05	0.000971296	-1	1.71837	3.29065	1.55713e-06	3.08635e-05	1	5.55789	7.27627	6.29166	5.95271
1424634_at	Tceal1	transcription elongation factor A (SII)-like 1	237052	0.856784	1.811	0.000858622	0.00758213	0	0.776599	1.71309	0.00198112	0.012406	0	-1.49465	-2.81796	1.579e-06	3.11374e-05	-1	7.85184	6.35719	7.21397	7.13379
1438575_a_at				1.15985	2.23434	0.00086007	0.00759125	1	0.317883	1.2465	0.290134	0.445825	0	-1.06428	-2.09113	0.00179562	0.00662998	-1	6.30459	5.2403	6.40015	5.55819
1434511_at	Phkb	phosphorylase kinase beta	102093	0.657188	1.57701	0.000861483	0.00759223	0	0.729132	1.65764	0.000324723	0.00358244	0	-1.10228	-2.14694	2.68549e-06	4.59607e-05	-1	11.131	10.0288	10.6859	10.7579
1434196_at	Dnaja4	DnaJ (Hsp40) homolog, subfamily A, member 4	58233	0.735998	1.66555	0.000865291	0.0076063	0	0.935965	1.91317	7.8479e-05	0.00144371	0	-1.3277	-2.51002	1.01144e-06	2.28072e-05	-1	11.4111	10.0834	10.8194	11.0193
1459703_at				1.15615	2.22862	0.000869253	0.0076298	1	1.1006	2.14444	0.00133476	0.00949841	1	-2.0133	-4.03705	1.64787e-06	3.21281e-05	-1	9.73714	7.72384	8.87998	8.82444
1452170_at	Chpf2	chondroitin polymerizing factor 2	100910	-1.01817	-2.02535	0.000869278	0.0076298	-1	-0.566701	-1.48113	0.0400739	0.10691	0	1.54008	2.90811	1.0273e-05	0.000123228	1	5.21232	6.75241	5.73423	6.18571
1425893_a_at	Fhit	fragile histidine triad gene	14198	0.905642	1.87338	0.00087088	0.00763593	0	0.727461	1.65572	0.00500084	0.0237149	0	-1.38774	-2.61669	8.75792e-06	0.000109953	-1	8.23315	6.84541	7.75105	7.57287
1435829_at	Zmat1	zinc finger, matrin type 1	215693	1.04979	2.07023	0.000871269	0.00763717	1	0.366492	1.28921	0.182511	0.319764	0	-0.452285	-1.36821	0.10415	0.171953	0	7.27566	6.82337	7.87316	7.18987
1425463_at	Gata6	GATA binding protein 6	14465	0.947795	1.92892	0.00087293	0.0076474	0	1.5652	2.95919	3.3608e-06	0.000223765	1	-0.481096	-1.3958	0.0589006	0.108856	0	3.36358	2.88249	3.83028	4.44769
1440448_at				1.27623	2.42206	0.000878004	0.00767231	1	0.841415	1.79181	0.0173768	0.0585403	0	-1.45291	-2.7376	0.000256632	0.00144804	-1	5.2843	3.83139	5.10762	4.6728
1423026_at	Rad51c	RAD51 homolog c (S. cerevisiae)	114714	-1.04287	-2.06032	0.000881112	0.00768862	-1	-1.06642	-2.09423	0.000720531	0.00618283	-1	0.173992	1.12818	0.516645	0.611069	0	3.42021	3.5942	2.55133	2.52779
1447693_s_at	Neo1	neogenin	18007	0.713805	1.64012	0.00088153	0.0076901	0	0.950692	1.9328	4.782e-05	0.00105224	0	-1.42255	-2.68058	2.5628e-07	8.32574e-06	-1	10.9143	9.49171	10.2055	10.4424
1448899_s_at	Rad51ap1	RAD51 associated protein 1	19362	-1.61256	-3.05795	0.000883404	0.00769777	-1	-2.18876	-4.55914	3.85803e-05	0.00093098	-1	0.994474	1.99235	0.0248469	0.0543454	0	6.59171	7.58619	5.97362	5.39743
1460606_at	Hsd17b13	hydroxysteroid (17-beta) dehydrogenase 13	243168	1.65808	3.15596	0.000888386	0.00772577	1	1.07541	2.10733	0.0191429	0.0628755	0	-1.92625	-3.80066	0.000211785	0.00124632	-1	4.11683	2.19058	3.84866	3.26599
1418334_at	Dbf4	DBF4 homolog (S. cerevisiae)	27214	-1.00641	-2.00891	0.000889563	0.00772968	-1	-1.00749	-2.01041	0.000881096	0.00710568	-1	0.905297	1.87293	0.00217438	0.00770238	0	9.90431	10.8096	9.8032	9.80212
1452302_at	Arhgef10	Rho guanine nucleotide exchange factor (GEF) 10	234094	0.671537	1.59277	0.0008903	0.00773392	0	0.801625	1.74306	0.000160332	0.00232609	0	-1.15572	-2.22796	2.00162e-06	3.74669e-05	-1	11.1301	9.97441	10.646	10.776
1446365_at	Vti1a	vesicle transport through interaction with t-SNAREs homolog 1A (yeast)	53611	1.19749	2.29341	0.000894363	0.00775616	1	0.390494	1.31084	0.212951	0.357905	0	-0.140267	-1.10211	0.648461	0.728914	0	4.26851	4.12824	5.32573	4.51873
1458340_at				0.878719	1.83874	0.000894828	0.00775801	0	0.748095	1.67957	0.00334793	0.0179453	0	-1.01297	-2.01806	0.000231058	0.00133139	-1	5.72206	4.70909	5.58781	5.45718
1455638_at	Zfp319	zinc finger protein 319	79233	1.14737	2.2151	0.000897157	0.007768	1	0.772097	1.70775	0.0157071	0.0544682	0	-1.34525	-2.54073	0.000194932	0.00116664	-1	6.76425	5.419	6.56637	6.1911
1460667_at	U90926	cDNA sequence U90926	57425	-2.36126	-5.13818	0.000898248	0.0077746	-1	-2.36126	-5.13818	0.000898248	0.00719877	-1	2.36126	5.13818	0.000898248	0.00382843	1	2.01891	4.38016	2.01891	2.01891
1458229_at	Robo2	roundabout homolog 2 (Drosophila)	268902	0.928775	1.90366	0.000898542	0.00777497	0	1.35192	2.55251	1.72419e-05	0.000562722	1	-0.833263	-1.78171	0.00224058	0.00788488	0	5.05419	4.22093	5.1497	5.57284
1434868_at	4933431E20Rik	RIKEN cDNA 4933431E20 gene	329735	1.03943	2.05541	0.00090102	0.00779137	1	1.52748	2.88283	1.54117e-05	0.000526651	1	-0.559052	-1.4733	0.0472704	0.0910697	0	6.61385	6.0548	7.09423	7.58229
1444937_at				1.10956	2.15779	0.000902046	0.0077944	1	0.900001	1.86607	0.00479911	0.0231253	0	-0.505078	-1.4192	0.0883971	0.150703	0	8.60233	8.09726	9.20681	8.99726
1442040_at	Tmem125	transmembrane protein 125	230678	-1.55858	-2.94563	0.000902674	0.00779765	-1	-0.882777	-1.84392	0.0377703	0.10263	0	1.77846	3.43059	0.000258693	0.00145726	1	4.69868	6.47713	4.91856	5.59436
1416386_a_at	M6pr	mannose-6-phosphate receptor, cation dependent	17113	-0.608677	-1.52486	0.000903845	0.00780383	0	-0.821327	-1.76703	4.25269e-05	0.000987102	0	1.08024	2.11439	1.35211e-06	2.77227e-05	1	9.26396	10.3442	9.73553	9.52288
1419130_at	Adat2	adenosine deaminase, tRNA-specific 2, TAD2 homolog (S. cerevisiae)	66757	-1.05305	-2.07492	0.000904397	0.00780383	-1	-0.769017	-1.70411	0.00969778	0.0382768	0	1.8738	3.66497	1.30589e-06	2.70107e-05	1	5.76384	7.63764	6.58459	6.86863
1440047_at	Socs1	suppressor of cytokine signaling 1	12703	-1.24013	-2.36219	0.000906459	0.00781944	-1	-1.24013	-2.36219	0.000906459	0.00724044	-1	1.24013	2.36219	0.000906459	0.00385741	1	2.01891	3.25903	2.01891	2.01891
1429405_at	2010317E24Rik	RIKEN cDNA 2010317E24 gene	72080	-1.135	-2.19618	0.000908425	0.00783422	-1	-1.02876	-2.04027	0.00208495	0.0128714	-1	0.511521	1.42555	0.091601	0.154947	0	4.99904	5.51056	4.37556	4.4818
1457446_at	Opcml	opioid binding protein/cell adhesion molecule-like	330908	2.82807	7.10122	0.000909512	0.00783922	1	2.07714	4.2197	0.00939182	0.0374608	1	-2.83799	-7.15024	0.000881603	0.00377412	-1	8.17974	5.34174	8.16981	7.41888
1421074_at	Cyp7b1	cytochrome P450, family 7, subfamily b, polypeptide 1	13123	-2.45652	-5.4889	0.000910706	0.00784733	-1	-2.50789	-5.68788	0.000756389	0.0063951	-1	3.99347	15.9277	4.38999e-06	6.60739e-05	1	7.50994	11.5034	9.04689	8.99552
1445370_at				0.766867	1.70157	0.000917617	0.00787781	0	0.924942	1.89861	0.000149064	0.0021945	0	-1.32242	-2.50086	2.03968e-06	3.78723e-05	-1	5.83812	4.51569	5.28256	5.44064
1434938_at	Rbfox2	RNA binding protein, fox-1 homolog (C. elegans) 2	93686	-1.08563	-2.12231	0.000917806	0.00787781	-1	-0.178709	-1.13187	0.524079	0.676738	0	0.603527	1.51943	0.0413836	0.0817636	0	7.68877	8.29229	7.20666	8.11358
1429090_at	Ggct	gamma-glutamyl cyclotransferase	110175	1.06109	2.0865	0.000919408	0.00788501	1	0.578085	1.49287	0.0451993	0.116545	0	0.0753953	1.05365	0.782391	0.839147	0	5.80961	5.885	6.94609	6.46309
1425942_a_at	Gpm6b	glycoprotein m6b	14758	-1.24714	-2.3737	0.000920019	0.00788779	-1	-0.535433	-1.44938	0.107272	0.217608	0	0.82708	1.77409	0.0173172	0.0406445	0	6.82827	7.65535	6.40821	7.11992
1423996_a_at	Il4ra	interleukin 4 receptor, alpha	16190	-1.76502	-3.39879	0.000920457	0.00788779	-1	-1.80825	-3.50216	0.000740777	0.00629894	-1	2.51655	5.72212	2.2846e-05	0.000227798	1	5.92904	8.44559	6.68057	6.63734
1419168_at	Mapk6	mitogen-activated protein kinase 6	50772	-1.08471	-2.12095	0.000920637	0.00788779	-1	-0.972675	-1.96248	0.00229884	0.013769	0	1.65829	3.15641	9.74911e-06	0.000118738	1	7.78069	9.43898	8.35427	8.4663
1433971_at	Camta1	calmodulin binding transcription activator 1	100072	0.611551	1.5279	0.00092608	0.00792686	0	1.0145	2.0202	3.45589e-06	0.000228133	1	-1.00802	-2.01115	3.75805e-06	5.89707e-05	-1	10.9144	9.90636	10.5179	10.9209
1417585_at	Nup210	nucleoporin 210	54563	-1.0573	-2.08103	0.000928044	0.00793927	-1	-0.676483	-1.59824	0.0211364	0.0677135	0	0.448785	1.36489	0.111361	0.181593	0	10.342	10.7908	9.73353	10.1144
1454830_at	Fbn2	fibrillin 2	14119	-1.11759	-2.16985	0.000933942	0.00797431	-1	-1.05856	-2.08285	0.00149083	0.0102592	-1	1.15969	2.2341	0.000669117	0.00304019	1	7.93765	9.09734	7.97975	8.03879
1429743_at	6720468P15Rik	RIKEN cDNA 6720468P15 gene	78073	-1.7191	-3.29232	0.000935697	0.00798489	-1	-1.73197	-3.32182	0.000875693	0.00707686	-1	1.66767	3.17702	0.00121944	0.00489104	1	2.16993	3.83761	2.1185	2.10563
1446498_at	Il20ra	interleukin 20 receptor, alpha	237313	1.59524	3.02144	0.000940633	0.00801156	1	1.60644	3.045	0.000883943	0.00712122	1	-1.63528	-3.10647	0.000753332	0.00334574	-1	9.11838	7.48311	9.07834	9.08955
1446295_at	Trim24	tripartite motif-containing 24	21848	1.48751	2.80405	0.000941111	0.00801342	1	1.75193	3.3681	0.000196702	0.00264088	1	-1.896	-3.72179	8.49114e-05	0.000621226	-1	8.74014	6.84414	8.33165	8.59607
1450974_at	Timp4	tissue inhibitor of metalloproteinase 4	110595	1.58274	2.99539	0.000941935	0.00801823	1	2.46375	5.5165	8.0285e-06	0.000352071	1	-1.80957	-3.50538	0.000266182	0.00148701	-1	5.1852	3.37563	4.95837	5.83938
1427891_at	Gimap6	GTPase, IMAP family member 6	231931	-1.03612	-2.0507	0.00094388	0.00803037	-1	-0.649335	-1.56844	0.0237784	0.07339	0	1.83102	3.55788	1.53096e-06	3.0501e-05	1	8.23249	10.0635	9.02739	9.41417
1436723_at	Cenpi	centromere protein I	102920	-1.12851	-2.18633	0.000948933	0.00806893	-1	-1.28432	-2.43568	0.000281062	0.0032787	-1	0.681491	1.6038	0.0287119	0.0610023	0	7.93293	8.61442	7.4859	7.33009
1448947_at	2810004N23Rik	RIKEN cDNA 2810004N23 gene	66523	-0.935745	-1.91288	0.000949627	0.00807138	0	-1.09076	-2.12986	0.000220934	0.00282766	-1	0.506954	1.42105	0.0470057	0.0906726	0	8.28128	8.78824	7.85249	7.69748
1455967_at	Sorbs1	sorbin and SH3 domain containing 1	20411	0.641078	1.55949	0.000950003	0.00807138	0	1.01613	2.02249	6.4623e-06	0.000318629	1	-0.932287	-1.9083	1.88114e-05	0.00019524	0	8.02704	7.09475	7.73583	8.11089
1425544_at	Plekha5	pleckstrin homology domain containing, family A member 5	109135	1.04416	2.06217	0.000951721	0.00807489	1	1.245	2.37019	0.0001755	0.00246546	1	-1.35561	-2.55905	7.02777e-05	0.000540168	-1	9.71881	8.36321	9.40737	9.60821
1459008_at				1.17586	2.25927	0.000958283	0.008115	1	1.03525	2.04947	0.00274938	0.0156472	1	-1.52165	-2.87119	7.34789e-05	0.00055922	-1	7.60464	6.08299	7.25885	7.11824
1419478_at	Sectm1b	secreted and transmembrane 1B	58210	0.980098	1.9726	0.000959157	0.00811796	0	1.74211	3.34525	1.45029e-06	0.000130326	1	1.09386	2.13444	0.000344997	0.00182708	1	5.25167	6.34552	7.32562	8.08764
1445402_at				1.00511	2.00709	0.000960232	0.0081196	1	0.0278241	1.01947	0.914648	0.967954	0	-0.230802	-1.17349	0.379063	0.478017	0	2.69622	2.46541	3.47052	2.49324
1445298_at	Cdca2	cell division cycle associated 2	108912	-0.844518	-1.79566	0.000961657	0.0081196	0	-1.00407	-2.00566	0.000183006	0.00252041	-1	0.342459	1.26792	0.128571	0.203255	0	8.36639	8.70885	7.86433	7.70477
1445330_at	Pdia3	protein disulfide isomerase associated 3	14827	-1.21247	-2.31735	0.000963273	0.00812781	-1	-1.80021	-3.4827	1.49034e-05	0.000517855	-1	0.406459	1.32543	0.204559	0.293092	0	6.05324	6.4597	5.24723	4.65949
1427029_at	Htra3	HtrA serine peptidase 3	78558	0.924363	1.89785	0.000963863	0.00812781	0	1.22815	2.34266	5.5107e-05	0.00115045	1	-0.620147	-1.53703	0.0167212	0.0394942	0	7.65414	7.034	7.95836	8.26215
1441111_at	Mylk4	myosin light chain kinase family, member 4	238564	1.98177	3.94976	0.000965443	0.0081378	1	2.26612	4.81026	0.00027332	0.00323718	1	-1.58723	-3.00473	0.00553587	0.0161705	-1	10.8259	9.23867	11.2204	11.5048
1448377_at	Slpi	secretory leukocyte peptidase inhibitor	20568	-2.63128	-6.19575	0.000966183	0.00814181	-1	-1.82332	-3.53894	0.0139284	0.0499013	-1	5.2892	39.1027	2.62778e-07	8.44938e-06	1	7.77319	13.0624	10.4311	11.2391
1435470_at				0.619028	1.53584	0.000969701	0.00816257	0	0.678865	1.60088	0.000414026	0.00421706	0	-1.12768	-2.18507	1.05475e-06	2.34423e-05	-1	8.04013	6.91246	7.53148	7.59132
1435612_at	Opcml	opioid binding protein/cell adhesion molecule-like	330908	1.91438	3.76953	0.000979802	0.00822747	1	1.35143	2.55165	0.0126041	0.0463211	1	-1.90338	-3.74089	0.00103068	0.00426794	-1	6.50703	4.60365	6.51804	5.95508
1434049_at	Entpd3	ectonucleoside triphosphate diphosphohydrolase 3	215446	-2.8846	-7.38502	0.000981467	0.00823252	-1	-1.90742	-3.75137	0.0183215	0.0609736	0	-0.389058	-1.30954	0.603746	0.690607	0	5.64982	5.26076	2.37616	3.35334
1458379_at	9330159F19Rik	RIKEN cDNA 9330159F19 gene	212448	1.5334	2.89467	0.000985974	0.00825499	1	1.35472	2.55747	0.00274445	0.0156352	1	-2.19225	-4.57016	2.42682e-05	0.000238219	-1	7.86804	5.6758	7.20919	7.03052
1443906_at	Cd55	CD55 antigen	13136	1.17913	2.26441	0.000986779	0.00825499	1	0.215884	1.16142	0.482724	0.638845	0	-0.491746	-1.40615	0.11972	0.192207	0	10.0052	9.51341	10.6925	9.72929
1453418_at	Col24a1	collagen, type XXIV, alpha 1	71355	-2.07046	-4.20021	0.000988836	0.00826749	-1	-1.77109	-3.41312	0.00351561	0.0185389	-1	1.89973	3.73143	0.00204145	0.00732538	1	2.31478	4.21451	2.14405	2.44342
1436218_at	Lgr6	leucine-rich repeat-containing G protein-coupled receptor 6	329252	0.988878	1.98464	0.000992009	0.00828726	0	1.27596	2.4216	7.925e-05	0.00145011	1	-1.09209	-2.13182	0.000396736	0.00203326	-1	10.8196	9.7275	10.7164	11.0035
1454144_a_at	Ccnc	cyclin C	51813	-0.879729	-1.84003	0.000992582	0.00828981	0	-1.00164	-2.00228	0.000294371	0.00336924	-1	1.02329	2.03256	0.00023754	0.00136039	1	3.78252	4.80582	3.92609	3.80417
1443138_at				1.05589	2.07899	0.000997817	0.00831782	1	1.6558	3.15097	7.94396e-06	0.000350807	1	-1.31009	-2.47957	0.000122114	0.00082224	-1	10.7928	9.4827	10.5386	11.1385
1440884_s_at	A530047J11Rik	RIKEN cDNA A530047J11 gene	103767	1.09441	2.13525	0.000998527	0.00831786	1	1.12307	2.1781	0.000793254	0.00661079	1	-1.63632	-3.10872	1.43809e-05	0.000159811	-1	10.1013	8.46496	9.55937	9.58803
1433825_at	Ntrk3	neurotrophic tyrosine kinase, receptor, type 3	18213	1.76818	3.40624	0.00099922	0.00831786	1	2.69453	6.47342	1.13865e-05	0.00043901	1	-3.02585	-8.14466	2.56925e-06	4.45125e-05	-1	6.8961	3.87024	5.63842	6.56477
1419811_at	Adcy9	adenylate cyclase 9	11515	0.718355	1.64531	0.000999755	0.0083183	0	0.905098	1.87267	0.000103775	0.00174612	0	-1.05639	-2.07972	1.76308e-05	0.000185916	-1	9.97122	8.91483	9.63319	9.81993
1436369_at	2900076A07Rik	RIKEN cDNA 2900076A07 gene	100504421	0.951037	1.93326	0.00100068	0.00832379	0	1.33791	2.52785	2.99537e-05	0.000795999	1	-2.202	-4.60117	3.45022e-08	2.014e-06	-1	7.2527	5.0507	6.00174	6.38861
1446524_at				0.98414	1.97813	0.00100329	0.00833834	0	0.971526	1.96091	0.00112285	0.00845417	0	-1.22007	-2.32959	0.000124009	0.000831923	-1	6.0575	4.83743	5.82157	5.80896
1442071_at	Abce1	ATP-binding cassette, sub-family E (OABP), member 1	24015	0.653689	1.57319	0.00100347	0.00833834	0	0.35709	1.28084	0.046607	0.119056	0	-1.76902	-3.40821	3.07131e-09	3.72893e-07	-1	9.06959	7.30058	7.95426	7.65767
1438483_at	Nos1	nitric oxide synthase 1, neuronal	18125	1.74823	3.35947	0.00101313	0.00840246	1	2.25222	4.76417	8.27907e-05	0.00149371	1	-2.73889	-6.67556	8.21798e-06	0.000105485	-1	7.73607	4.99718	6.74542	7.24941
1437869_at	Ppp2r3a	protein phosphatase 2, regulatory subunit B'', alpha	235542	1.00511	2.0071	0.00101448	0.00841065	1	0.854403	1.80801	0.00376358	0.0194168	0	-1.09676	-2.13874	0.000456282	0.00225907	-1	10.1493	9.05258	10.0577	9.90698
1423037_at	Aplnr	apelin receptor	23796	-1.1233	-2.17844	0.0010215	0.00845378	-1	-0.112286	-1.08094	0.701291	0.819845	0	-0.795391	-1.73555	0.012732	0.0316231	0	9.77294	8.97755	7.85426	8.86527
1423499_at	Sncaip	synuclein, alpha interacting protein (synphilin)	67847	0.668924	1.58989	0.00102346	0.00846548	0	0.895193	1.85986	5.48671e-05	0.00114776	0	-1.83267	-3.56195	2.6168e-09	3.32033e-07	-1	7.07545	5.24278	5.91171	6.13798
1439872_at				1.87398	3.66544	0.00102432	0.00847033	1	3.56491	11.8344	6.30966e-07	8.00308e-05	1	-2.87208	-7.32121	1.09882e-05	0.000129895	-1	5.90498	3.0329	4.90688	6.59781
1455504_a_at				-0.531743	-1.44568	0.00102912	0.00849412	0	-0.393342	-1.31343	0.00980691	0.0385944	0	1.08507	2.12149	2.3463e-07	7.78579e-06	1	10.4831	11.5682	11.0365	11.1749
1427853_a_at				0.71694	1.64369	0.00103113	0.00850622	0	1.2533	2.38386	2.02868e-06	0.000157227	1	-1.44443	-2.72156	2.82818e-07	8.93475e-06	-1	12.7372	11.2928	12.0097	12.5461
1449725_at	Gfpt1	glutamine fructose-6-phosphate transaminase 1	14583	-1.01915	-2.02673	0.00103188	0.00851012	-1	-1.65863	-3.15717	5.19718e-06	0.000285152	-1	1.16257	2.23856	0.000301914	0.0016449	1	3.51195	4.67452	3.65537	3.01589
1434240_at	4632434I11Rik	RIKEN cDNA 4632434I11 gene	74041	-1.08779	-2.12549	0.00103653	0.00853707	-1	-1.34291	-2.53662	0.000134921	0.00206483	-1	1.74575	3.35369	6.25872e-06	8.61583e-05	1	5.92763	7.67338	6.58559	6.33047
1452260_at	Cidec	cell death-inducing DFFA-like effector c	14311	1.36424	2.57441	0.00103847	0.00854054	1	1.74024	3.34091	9.51366e-05	0.00163726	1	-2.56756	-5.92805	7.48837e-07	1.84267e-05	-1	11.7148	9.14727	10.5115	10.8875
1428948_at	Kcnma1	potassium large conductance calcium-activated channel, subfamily M, alpha member 1	16531	1.23503	2.35386	0.00104325	0.00856514	1	1.47666	2.78303	0.000190016	0.00259217	1	-2.02727	-4.07633	4.72865e-06	6.95813e-05	-1	7.95938	5.93211	7.16714	7.40877
1427854_x_at				0.785506	1.7237	0.00104756	0.00858909	0	1.25214	2.38195	6.92605e-06	0.000326876	1	-1.5026	-2.83354	6.05108e-07	1.55988e-05	-1	12.2656	10.763	11.5485	12.0152
1421930_at	Icos	inducible T cell co-stimulator	54167	-1.66046	-3.16118	0.00104905	0.00859901	-1	-1.06926	-2.09835	0.0219853	0.0694841	0	4.06115	16.6928	1.62114e-08	1.20361e-06	1	6.00359	10.0647	8.40427	8.99548
1434399_at	Galnt6	UDP-N-acetyl-alpha-D-galactosamine:polypeptide N-acetylgalactosaminyltransferase 6	207839	-1.12975	-2.1882	0.00105129	0.00861288	-1	-0.695566	-1.61952	0.0276489	0.081766	0	2.53982	5.81516	5.85476e-08	2.94737e-06	1	8.73668	11.2765	10.1467	10.5809
1436698_x_at	Tmem204	transmembrane protein 204	407831	0.836355	1.78553	0.00105545	0.00864451	0	1.01653	2.02304	0.000162482	0.00234967	1	-1.00189	-2.00262	0.000188895	0.00113933	-1	9.42236	8.42047	9.25682	9.43699
1429146_at	Svip	small VCP/p97-interacting protein	75744	0.862519	1.81821	0.00105731	0.00864847	0	0.756299	1.68915	0.00309064	0.0169495	0	-1.82739	-3.54894	1.42239e-07	5.46452e-06	-1	8.11076	6.28337	7.14589	7.03967
1424380_at	Vps37b	vacuolar protein sorting 37B (yeast)	330192	-0.640209	-1.55855	0.00105821	0.00865301	0	-0.55003	-1.46412	0.00360528	0.0188834	0	1.10546	2.15168	2.48755e-06	4.33397e-05	1	8.17974	9.2852	8.64499	8.73517
1454855_at	Magi2	membrane associated guanylate kinase, WW and PDZ domain containing 2	50791	0.62379	1.54092	0.00105843	0.00865301	0	1.06397	2.09067	2.92786e-06	0.000202312	1	-1.37447	-2.59273	7.99148e-08	3.64984e-06	-1	6.56158	5.18711	5.8109	6.25108
1417307_at	Dmd	dystrophin, muscular dystrophy	13405	0.864137	1.82025	0.00106112	0.00866817	0	1.16856	2.24787	5.10904e-05	0.00109215	1	-1.95467	-3.87626	5.4257e-08	2.78573e-06	-1	10.3706	8.41597	9.2801	9.58452
1442140_at	Tnn	tenascin N	329278	-1.13845	-2.20144	0.00106422	0.00868137	-1	-1.03207	-2.04496	0.00240196	0.0142053	-1	0.782316	1.71989	0.0155677	0.0372758	0	2.42657	3.20889	2.07044	2.17681
1449184_at	Pglyrp1	peptidoglycan recognition protein 1	21946	-2.10667	-4.30696	0.00106442	0.00868137	-1	-1.71641	-3.28618	0.00530952	0.0247703	-1	2.88689	7.39674	4.40845e-05	0.000378077	1	7.34962	10.2365	8.12984	8.5201
1437751_at	Ppargc1a	peroxisome proliferative activated receptor, gamma, coactivator 1 alpha	19017	0.656853	1.57664	0.0010677	0.00869895	0	0.861171	1.81651	7.29009e-05	0.00138128	0	-1.34674	-2.54338	2.32842e-07	7.7514e-06	-1	5.43784	4.0911	4.74795	4.95227
1419358_at	Sorcs2	sortilin-related VPS10 domain containing receptor 2	81840	-1.91378	-3.76796	0.00107182	0.00872911	-1	-1.01264	-2.0176	0.0548001	0.133981	0	0.900493	1.8667	0.0844744	0.145385	0	6.35661	7.25711	5.34332	6.24446
1448093_s_at	C77405	expressed sequence C77405	98108	0.975853	1.9668	0.00107197	0.00872911	0	1.1281	2.18571	0.000276154	0.00325313	1	-1.15505	-2.22692	0.000217597	0.00126918	-1	7.17821	6.02316	6.99901	7.15126
1451527_at	Pcolce2	procollagen C-endopeptidase enhancer 2	76477	1.16265	2.23869	0.00107591	0.0087474	1	1.44495	2.72253	0.000131512	0.00203656	1	-1.44651	-2.72548	0.000130011	0.000862653	-1	11.9812	10.5347	11.6973	11.9796
1434766_at	Prkaa2	protein kinase, AMP-activated, alpha 2 catalytic subunit	108079	1.01214	2.01689	0.00108198	0.00877836	1	1.17005	2.25019	0.000279114	0.00326567	1	-1.26702	-2.40664	0.000122597	0.000824954	-1	10.312	9.04503	10.0572	10.2151
1427912_at	Cbr3	carbonyl reductase 3	109857	-0.596364	-1.5119	0.00108543	0.00879669	0	-0.531454	-1.44539	0.00279409	0.0158116	0	1.17826	2.26304	4.06388e-07	1.16283e-05	1	10.7056	11.8839	11.2875	11.3524
1437258_at				-2.67047	-6.36638	0.00108665	0.00879851	-1	-1.78414	-3.44414	0.0184531	0.0612402	0	6.50437	90.7846	1.83885e-08	1.32397e-06	1	5.66851	12.1729	9.50241	10.3887
1451698_at	Psrc1	proline/serine-rich coiled-coil 1	56742	-1.06742	-2.09568	0.00108674	0.00879851	-1	-1.01457	-2.0203	0.00167174	0.0110286	-1	0.321617	1.24973	0.258484	0.352076	0	3.40022	3.72183	2.65442	2.70726
1436968_x_at	Klhl24	kelch-like 24 (Drosophila)	75785	1.16283	2.23896	0.00108773	0.00880134	1	0.941379	1.92036	0.00564749	0.0258783	0	-0.792859	-1.7325	0.0164998	0.0390664	0	8.4433	7.65044	8.81327	8.59182
1456908_at	BC023202	cDNA sequence BC023202	407816	1.05357	2.07566	0.00109145	0.00882047	1	1.0536	2.0757	0.00109118	0.00828014	1	-1.00909	-2.01264	0.00157563	0.00599207	-1	6.4515	5.44242	6.49598	6.49601
1441897_at	B230120H23Rik	RIKEN cDNA B230120H23 gene	65964	1.19857	2.29512	0.00109848	0.00886571	1	1.26461	2.40262	0.000680511	0.00594991	1	-1.92498	-3.79732	6.7473e-06	9.12212e-05	-1	8.64529	6.72031	7.91888	7.98491
1442445_at	2610027H17Rik	RIKEN cDNA 2610027H17 gene	71811	1.37153	2.58746	0.00110036	0.00887628	1	0.552245	1.46637	0.136745	0.259572	0	-0.267722	-1.20391	0.460178	0.558316	0	4.51897	4.25125	5.62279	4.8035
1451968_at	Xrcc5	X-ray repair complementing defective repair in Chinese hamster cells 5	22596	-0.856755	-1.81096	0.00110925	0.00892793	0	-0.719672	-1.64681	0.00442261	0.0218171	0	1.04362	2.06139	0.000168543	0.00104345	1	9.06727	10.1109	9.25413	9.39121
1424961_at	Tapbpl	TAP binding protein-like	213233	-0.774341	-1.71041	0.00111048	0.00893229	0	-0.783332	-1.7211	0.00100398	0.00778445	0	1.04353	2.06126	5.63565e-05	0.000455442	1	2.91891	3.96244	3.1881	3.17911
1429276_at	Trank1	tetratricopeptide repeat and ankyrin repeat containing 1	320429	1.89833	3.7278	0.00111202	0.00894003	1	2.41634	5.33814	0.000106023	0.00177238	1	-0.663796	-1.58425	0.193498	0.280371	0	5.78985	5.12606	7.02438	7.54239
1451862_a_at	Prf1	perforin 1 (pore forming protein)	18646	-1.9667	-3.90874	0.0011138	0.00894706	-1	-1.79392	-3.46756	0.00238485	0.0141257	-1	3.44068	10.8579	2.26009e-06	4.0658e-05	1	3.57433	7.01501	5.04831	5.22109
1423253_at	Mpz	myelin protein zero	17528	1.20003	2.29745	0.001115	0.00894771	1	1.8714	3.65888	9.99134e-06	0.000402252	1	-1.80359	-3.49088	1.57489e-05	0.000170963	-1	11.6486	9.84504	11.0451	11.7164
1417171_at	Itk	IL2 inducible T cell kinase	16428	-1.70163	-3.25267	0.00111697	0.00895657	-1	-1.32778	-2.51017	0.00739203	0.0315314	-1	3.46361	11.0319	2.78492e-07	8.83413e-06	1	4.38774	7.85135	6.14973	6.52357
1436528_at	Kazald1	Kazal-type serine peptidase inhibitor domain 1	107250	1.3466	2.54312	0.00111807	0.00896309	1	1.65598	3.15138	0.000154038	0.00225379	1	-1.41368	-2.66417	0.000725768	0.00324473	-1	9.68875	8.27506	9.62166	9.93105
1423358_at	Ece2	endothelin converting enzyme 2	107522	-0.896244	-1.86121	0.00112446	0.00899332	0	-1.09523	-2.13647	0.00016568	0.00238358	-1	1.06633	2.0941	0.000218296	0.00127206	1	8.69083	9.75717	8.86092	8.66194
1438849_at	Krt78	keratin 78	332131	1.41539	2.66733	0.00113924	0.00907874	1	1.60078	3.03308	0.000367283	0.0038902	1	-0.572843	-1.48745	0.136324	0.212936	0	12.094	11.5212	12.9366	13.122
1425623_a_at	Cbs	cystathionine beta-synthase	12411	1.58711	3.00448	0.00114179	0.00909408	1	1.81604	3.52114	0.000328503	0.00360654	1	-2.54047	-5.81778	7.45042e-06	9.80301e-05	-1	8.89336	6.3529	7.94001	8.16894
1448834_at	Foxm1	forkhead box M1	14235	-1.95084	-3.86599	0.00114385	0.00910376	-1	-2.02981	-4.08352	0.000805845	0.00668598	-1	1.06339	2.08983	0.0500698	0.095469	0	3.36773	4.43112	2.48028	2.4013
1434558_at	Wdr47	WD repeat domain 47	99512	0.668418	1.58933	0.00114503	0.00910771	0	0.55425	1.46841	0.00497825	0.023645	0	-1.23696	-2.35701	1.10358e-06	2.41803e-05	-1	11.4354	10.1984	10.8669	10.7527
1427231_at	Robo1	roundabout homolog 1 (Drosophila)	19876	0.81484	1.7591	0.00114939	0.0091291	0	1.06356	2.09008	8.40914e-05	0.00150972	1	-1.32515	-2.5056	6.14947e-06	8.49566e-05	-1	12.0542	10.729	11.5439	11.7926
1449267_at	Chid1	chitinase domain containing 1	68038	-0.708492	-1.63409	0.00115004	0.00913189	0	-1.22309	-2.33446	2.83281e-06	0.000198299	-1	0.389281	1.30974	0.0485699	0.0931041	0	9.26713	9.65641	8.94792	8.43332
1449903_at	Crtam	cytotoxic and regulatory T cell molecule	54698	-0.92718	-1.90156	0.00116331	0.00921241	0	-0.916842	-1.88798	0.00128088	0.00923735	0	1.43424	2.70239	1.17425e-05	0.000136871	1	3.01361	4.44784	3.52066	3.531
1442137_at	Enox	expressed neighbor of Xist	70252	-0.477409	-1.39224	0.00116608	0.00922965	0	-0.440625	-1.35719	0.00226573	0.013634	0	1.20506	2.30548	1.20173e-08	9.8168e-07	1	7.23086	8.43593	7.95852	7.9953
1427922_at	2310061C15Rik	RIKEN cDNA 2310061C15 gene	66531	-1.05981	-2.08465	0.00116623	0.00922965	-1	-1.15081	-2.22038	0.000555932	0.00516556	-1	0.582574	1.49752	0.0488063	0.0934647	0	5.44311	6.02569	4.96588	4.87488
1416695_at	Tspo	translocator protein	12257	-0.747287	-1.67863	0.00117053	0.00924541	0	-0.864455	-1.82065	0.000303456	0.00344392	0	1.11225	2.16183	1.89701e-05	0.000196558	1	11.1691	12.2813	11.5341	11.4169
1430744_at	Napsa	napsin A aspartic peptidase	16541	-1.05756	-2.08141	0.00117098	0.00924541	-1	-0.640199	-1.55854	0.0318604	0.09077	0	0.883052	1.84427	0.00482665	0.0144884	0	3.70683	4.58988	3.53233	3.94968
1435212_at	P2rx2	purinergic receptor P2X, ligand-gated ion channel, 2	231602	1.52992	2.8877	0.00118039	0.00929422	1	2.29583	4.91036	1.7387e-05	0.000563299	1	-1.27381	-2.41799	0.00495824	0.0148058	-1	4.70011	3.4263	4.95622	5.72212
1439821_at	Lrp2bp	Lrp2 binding protein	67620	1.50856	2.84525	0.00118249	0.00930362	1	1.12738	2.18462	0.0101654	0.0395925	1	-1.06629	-2.09405	0.0141994	0.0345825	-1	4.51671	3.45042	4.95898	4.5778
1431431_a_at	Nfs1	nitrogen fixation gene 1 (S. cerevisiae)	18041	-0.607636	-1.52376	0.00118365	0.00931028	0	-0.758753	-1.69203	0.000140562	0.00211664	0	1.04134	2.05814	3.25952e-06	5.2918e-05	1	4.70321	5.74455	5.13691	4.9858
1417626_at	Pde4dip	phosphodiesterase 4D interacting protein (myomegalin)	83679	1.15659	2.22929	0.00118402	0.00931028	1	1.60098	3.03349	4.52158e-05	0.00102301	1	-1.26917	-2.41023	0.000512021	0.0024688	-1	11.025	9.75587	10.9125	11.3568
1457296_at	Cilp	cartilage intermediate layer protein, nucleotide pyrophosphohydrolase	214425	1.23324	2.35095	0.00118976	0.00933712	1	1.52441	2.87668	0.000157378	0.00229386	1	-1.29098	-2.44693	0.000794983	0.00348868	-1	11.4571	10.1661	11.3994	11.6905
1440645_at	BB114814	expressed sequence BB114814	100043173	-2.01645	-4.04587	0.00119214	0.00934868	-1	-1.00712	-2.00989	0.0715467	0.161873	0	5.68795	51.5517	2.17476e-09	2.88973e-07	1	2.06601	7.75396	5.73751	6.74684
1427348_at	Zc3h12a	zinc finger CCCH type containing 12A	230738	-0.755504	-1.68822	0.0012011	0.00940705	0	-0.400401	-1.31987	0.0573683	0.138109	0	2.30755	4.95042	6.10805e-10	1.06839e-07	1	8.6794	10.9869	10.2314	10.5865
1429120_at	Lnp	limb and neural patterns	69605	1.08124	2.11585	0.00120354	0.00941878	1	0.812072	1.75573	0.0099817	0.0391281	0	-1.23679	-2.35674	0.000349903	0.00184643	-1	7.14847	5.91168	6.99291	6.72375
1455785_at	Kcna1	potassium voltage-gated channel, shaker-related subfamily, member 1	16485	2.06517	4.18485	0.00120611	0.00942211	1	4.10352	17.1902	4.45585e-07	6.81421e-05	1	-3.92755	-15.2164	8.23018e-07	1.96005e-05	-1	7.50773	3.58018	5.64535	7.68369
1460386_a_at	Slc1a1	solute carrier family 1 (neuronal/epithelial high affinity glutamate transporter, system Xag), member 1	20510	-1.23946	-2.36111	0.00120637	0.00942211	-1	-1.23713	-2.35729	0.00122607	0.00898019	-1	1.23931	2.36085	0.00120766	0.00485636	1	2.09748	3.33679	2.09732	2.09966
1449361_at	Tbx21	T-box 21	57765	-1.29465	-2.45318	0.00120911	0.00943401	-1	-0.812807	-1.75663	0.0271914	0.0808546	0	3.77209	13.6619	1.32816e-09	1.98646e-07	1	2.22095	5.99303	4.69838	5.18022
1415978_at	Tubb3	tubulin, beta 3 class III	22152	-4.5529	-23.4726	0.00121725	0.00948551	-1	-3.84529	-14.373	0.00459457	0.0224579	-1	1.89733	3.72522	0.128489	0.203162	0	5.27574	7.17307	2.62016	3.32778
1422912_at	Bmp4	bone morphogenetic protein 4	12159	1.15337	2.22433	0.00122311	0.00952349	1	1.51054	2.84916	8.76871e-05	0.00155133	1	-2.15712	-4.46022	1.06004e-06	2.3526e-05	-1	9.38742	7.23031	8.38368	8.74084
1423259_at	Id4	inhibitor of DNA binding 4	15904	1.16519	2.24263	0.00122338	0.00952349	1	1.69367	3.23479	2.67613e-05	0.00074241	1	-1.46345	-2.75767	0.000137665	0.000898411	-1	11.3397	9.87629	11.0415	11.57
1460693_a_at	Col9a3	collagen, type IX, alpha 3	12841	1.13601	2.19772	0.00122502	0.00952831	1	0.233255	1.17548	0.443183	0.601981	0	-0.204163	-1.15202	0.501286	0.597123	0	2.78642	2.58226	3.71827	2.81551
1442876_at				1.22583	2.33889	0.0012252	0.00952831	1	1.20169	2.30009	0.00145073	0.0100637	1	-1.22595	-2.33909	0.00122417	0.00490617	-1	4.86899	3.64304	4.86887	4.84473
1453007_at	3110082I17Rik	RIKEN cDNA 3110082I17 gene	73212	-0.797605	-1.73821	0.00122698	0.00953734	0	-0.815612	-1.76005	0.00101086	0.00783192	0	1.1024	2.14712	4.8231e-05	0.000405219	1	7.36294	8.46534	7.66774	7.64973
1423835_at	Zfp503	zinc finger protein 503	218820	0.811322	1.75482	0.00122885	0.00954708	0	0.760422	1.69399	0.00210378	0.0129489	0	-1.48236	-2.79405	1.46905e-06	2.95912e-05	-1	9.97932	8.49697	9.30829	9.25739
1432281_a_at	Itgb6	integrin beta 6	16420	-1.32278	-2.50148	0.00122954	0.00954783	-1	-1.08842	-2.12642	0.00556691	0.0256225	-1	0.737407	1.66718	0.0472228	0.0910007	0	3.47388	4.21129	2.88851	3.12287
1421403_at	Pi15	peptidase inhibitor 15	94227	-1.79741	-3.47597	0.00123047	0.00955248	-1	-1.70491	-3.26008	0.00191268	0.0120924	-1	0.951071	1.93331	0.0583693	0.108068	0	2.95405	3.90512	2.1077	2.20021
1455116_at	Relt	RELT tumor necrosis factor receptor	320100	-0.960093	-1.94544	0.0012349	0.00957725	0	-1.22703	-2.34085	0.000115684	0.0018795	-1	1.55288	2.93401	7.32864e-06	9.67981e-05	1	4.15797	5.71084	4.75075	4.48381
1424524_at	Dram1	DNA-damage regulated autophagy modulator 1	71712	-0.759527	-1.69294	0.00123949	0.00960803	0	-0.98168	-1.97476	0.000102966	0.0017344	0	1.23411	2.35236	6.95373e-06	9.31139e-05	1	10.5821	11.8162	11.0566	10.8345
1456586_x_at	Mvp	major vault protein	78388	-0.458211	-1.37384	0.00124448	0.00963349	0	-0.712684	-1.63885	1.20924e-05	0.000457119	0	1.08966	2.12824	3.36801e-08	1.99376e-06	1	8.71866	9.80832	9.35011	9.09564
1422317_a_at	Il1rl1	interleukin 1 receptor-like 1	17082	-3.84367	-14.3569	0.00124535	0.00963349	-1	-3.42253	-10.7222	0.00317508	0.0172517	-1	5.6658	50.7662	2.32267e-05	0.000230925	1	4.29783	9.96363	6.11996	6.5411
1449422_at	Cdh4	cadherin 4	12561	1.47998	2.78945	0.00124557	0.00963349	1	1.98937	3.97062	6.73441e-05	0.00131048	1	-1.8673	-3.6485	0.00013412	0.000883104	-1	5.09347	3.22617	4.70614	5.21553
1449135_at	Sox18	SRY-box containing gene 18	20672	-0.991396	-1.98811	0.00125333	0.00967415	0	0.837159	1.78653	0.00471385	0.0228389	0	-1.58377	-2.99753	8.75624e-06	0.000109953	-1	6.96924	5.38546	4.39407	6.22262
1429958_x_at	Haghl	hydroxyacylglutathione hydrolase-like	68977	-0.558568	-1.47281	0.00125822	0.00970463	0	-0.286832	-1.21996	0.0661074	0.15316	0	1.43541	2.70459	1.04397e-08	8.80687e-07	1	7.36513	8.80054	8.24197	8.5137
1424840_at	Rbks	ribokinase	71336	-0.731853	-1.66077	0.00126314	0.00973543	0	-0.771551	-1.7071	0.000794277	0.00661206	0	1.5751	2.97956	1.52745e-07	5.76707e-06	1	6.63345	8.20855	7.47669	7.437
1437293_x_at	Ust	uronyl-2-sulfotransferase	338362	1.22612	2.33936	0.00126315	0.00973543	1	0.881723	1.84257	0.0134308	0.0485871	0	-0.304015	-1.23458	0.357899	0.456126	0	6.63862	6.3346	7.56072	7.21633
1443772_at	Dzip1	DAZ interacting protein 1	66573	1.60036	3.03218	0.00126426	0.00973911	1	2.18113	4.53509	5.8814e-05	0.00119975	1	-2.5027	-5.66745	1.15668e-05	0.000135339	-1	6.95068	4.44798	6.04833	6.62911
1426566_s_at	Il17re	interleukin 17 receptor E	57890	-1.20687	-2.30836	0.00126734	0.00976038	-1	-0.412259	-1.33077	0.210116	0.354194	0	0.0036118	1.00251	0.991045	0.99574	0	7.10193	7.10555	5.89868	6.69329
1455279_at	Ccdc164	coiled-coil domain containing 164	381738	1.10488	2.15081	0.00127278	0.00978772	1	1.15986	2.23436	0.000831908	0.00683542	1	-0.85923	-1.81407	0.00834263	0.0225343	0	6.07238	5.21315	6.31803	6.37301
1420352_at	Prss22	protease, serine, 22	70835	-1.29449	-2.45289	0.00127553	0.00980639	-1	-0.642125	-1.56063	0.0754275	0.16822	0	1.41195	2.66096	0.00058768	0.00273679	1	7.5973	9.00925	7.71477	8.36713
1444570_at				0.772422	1.70813	0.00127657	0.009812	0	0.392728	1.31287	0.069019	0.157734	0	-1.09694	-2.13901	3.72434e-05	0.000332006	-1	7.86174	6.7648	7.53722	7.15753
1418745_at	Omd	osteomodulin	27047	1.17916	2.26445	0.00127966	0.00983085	1	0.705301	1.63048	0.0353618	0.0977762	0	-1.75604	-3.37769	2.13473e-05	0.000215492	-1	10.2183	8.46222	9.64138	9.16752
1422313_a_at	Igfbp5	insulin-like growth factor binding protein 5	16011	0.913806	1.88401	0.00128039	0.00983154	0	0.841314	1.79168	0.00251747	0.0146652	0	-1.4745	-2.77887	7.96712e-06	0.00010312	-1	10.6071	9.13264	10.0464	9.97395
[truncated: 4,243 more rows]
